# Supplementary material
Source: HighWire-hosted journal article supplement (doi:10.1101/rna.079727.123)
Supplement: Supplementary_Table_1_to_6.xlsx [file Supplementary_Table_1_to_6.xlsx]

## Sheet: Supplementary_Table_1
chromosome	normal_shamRV	as_all_shamRV	as_unblocked_shamRV	normal_dep2	as_all_dep2	as_unblocked_dep2
1	89168	63948	43964	71998	60462	38437
2	22118	21888	150	19296	21948	82
3	11746	11497	45	10323	11697	28
4	14652	13933	42	13235	14995	19
5	22970	22264	59	19688	22338	32
6	12711	12524	37	10839	12557	14
7	27916	27498	79	23051	26049	49
8	14834	14486	35	13125	14911	24
9	20744	20147	57	17905	20728	31
10	16642	15804	49	14153	15822	29
11	22724	22371	58	19192	22296	39
12	7047	6890	21	5967	6690	13
13	9188	8914	26	7844	8844	18
14	9624	9261	22	8139	9750	18
15	16710	16467	57	14888	17240	32
16	6508	6507	19	5946	6582	10
17	10753	10547	34	9186	10798	17
18	5489	5434	14	4757	5473	8
19	8571	8087	25	7471	8248	13
X	7248	7131	28	6212	7195	10
Y	79	66	0	58	81	0
MT	183797	97803	84727	132385	90615	74960

## Sheet: Supplementary_Table_2
Gene	chromosome	adaptive_sampling_pass_rep1	normal_run_pass_genes_rep1	adaptive_sampling_pass_unblock_rep1	adaptive_sampling_pass_rep2	normal_run_pass_genes_rep2	adaptive_sampling_pass_unblock_rep2
Gnai3	3	12	6	0	2	3	0
Pbsn	X	0	0	0	0	0	0
Cdc45	16	0	2	0	0	1	0
H19	7	9	8	0	7	6	0
Scml2	X	0	0	0	0	0	0
Apoh	11	0	0	0	0	0	0
Narf	11	22	15	0	21	28	0
Cav2	6	25	22	0	20	19	0
Klf6	13	5	12	0	18	12	1
Scmh1	4	3	2	0	4	4	0
Cox5a	9	888	884	0	846	778	1
Tbx2	11	0	1	0	2	0	0
Tbx4	11	0	0	0	0	0	0
Zfy2	Y	0	0	0	0	0	0
Ngfr	11	0	0	0	0	0	0
Wnt3	11	0	0	0	0	0	0
Wnt9a	11	1	1	0	3	1	0
Fer	17	5	8	0	6	9	0
Xpo6	7	2	2	0	1	0	0
Tfe3	X	1	3	0	3	3	0
Axin2	11	1	0	0	0	1	0
Brat1	5	1	0	0	2	3	0
Gna12	5	23	18	0	21	23	0
Slc22a18	7	0	0	0	0	0	0
Itgb2l	16	0	0	0	0	0	0
Igsf5	16	0	0	0	0	0	0
Pih1d2	9	0	0	0	1	0	0
Dlat	9	118	122	0	136	115	1
Sdhd	9	253	217	0	225	202	1
Fgf23	6	0	0	0	0	0	0
Fgf6	6	0	0	0	0	0	0
Ccnd2	6	12	12	0	14	10	0
Gpr107	2	4	6	0	4	8	0
Nalcn	14	0	0	0	0	0	0
Btbd17	11	0	0	0	0	0	0
Slfn4	11	0	0	0	0	0	0
Th	7	0	0	0	0	0	0
Ins2	7	0	0	0	0	0	0
Scnn1g	7	0	0	0	0	0	0
Drp2	X	0	0	0	0	0	0
Tspan32	7	0	0	0	0	0	0
Lhx2	2	0	0	0	0	0	0
Clec2g	6	0	0	0	0	0	0
Gmpr	13	42	52	0	47	35	0
Glra1	11	0	0	0	0	0	0
Mid2	X	3	8	0	6	10	0
Trim25	11	6	2	0	9	3	0
Dgke	11	9	3	0	8	4	0
Scpep1	11	4	3	0	1	3	0
Mnt	11	0	1	0	1	0	0
Itgb2	10	1	0	0	2	1	0
Hddc2	10	2	1	0	0	1	0
Tpd52l1	10	6	5	0	3	2	0
Pemt	11	0	1	0	2	0	0
Cdh1	8	0	0	0	0	0	0
Cdh4	2	0	0	0	0	1	0
Ckmt1	2	0	0	0	0	0	0
Bcl6b	11	2	2	0	3	1	0
Clec10a	11	2	1	0	2	0	0
Alox12	11	4	9	0	4	1	0
Comt	16	34	46	0	68	54	1
Rtca	3	8	12	1	4	7	0
Dbt	3	15	15	0	15	16	0
Dazap2	15	62	58	0	76	63	0
Mcts1	X	17	14	0	12	13	0
Rem1	2	0	1	0	2	1	0
Rnf17	14	0	0	0	0	0	0
Trappc10	10	11	9	0	6	6	0
Ccm2	11	3	9	0	8	2	0
Wap	11	0	0	0	0	0	0
Tbrg4	11	11	14	0	14	15	0
Tmprss2	16	0	0	0	0	0	0
Mx1	16	0	0	0	0	0	0
Fap	2	1	2	0	0	0	0
Gcg	2	0	0	0	0	0	0
Ndufa9	6	233	230	3	253	218	1
Egfl6	X	0	0	0	0	0	0
Lck	4	0	0	0	0	0	0
Tssk3	4	0	0	0	0	0	0
Cttnbp2	6	1	0	0	0	0	0
Galnt1	18	12	22	0	22	19	0
Myf5	10	0	0	0	0	0	0
Mkrn2	6	11	8	0	8	16	0
Pparg	6	2	7	0	4	4	0
Raf1	6	23	23	0	21	21	0
Sept1	7	0	0	0	1	0	0
Pdgfb	15	4	5	0	9	4	0
Acvrl1	15	7	5	0	9	4	1
Grasp	15	2	2	0	4	2	0
Acvr1b	15	2	4	0	4	4	0
Tom1l2	11	21	16	0	22	12	0
Gpa33	1	0	0	0	0	0	0
Zfp385a	15	0	2	0	1	0	0
Itga5	15	4	5	0	6	7	0
Gabra2	5	0	0	0	0	0	0
Wdr77	3	15	14	0	11	15	0
Adora3	3	0	0	0	0	0	0
Atp5f1	3	708	685	0	711	651	1
Sox9	11	0	1	0	1	0	0
Hnrnpd	5	28	19	0	23	18	0
Dynlt1c	17	6	4	0	7	7	0
C1d	11	20	24	0	26	15	0
Gm2a	11	7	3	0	2	7	0
Krit1	5	8	10	0	9	7	0
Clcn4	7	13	12	0	17	10	0
Vmn2r88	14	0	0	0	0	0	0
Grm6	11	0	0	0	0	0	0
Sema4f	6	0	0	0	0	0	0
Hk2	6	42	50	0	50	42	0
Myo18a	11	5	12	0	10	7	0
Sez6	11	0	0	0	0	0	0
Haao	17	0	0	0	0	0	0
Cd52	4	3	6	0	4	2	0
Abhd15	11	0	0	0	0	0	0
Hoxb6	11	0	0	0	0	0	0
Loxl3	6	3	1	0	0	2	0
Tcl1b5	12	0	0	0	0	0	0
Btn1a1	13	0	0	0	0	0	0
Kat2b	17	12	22	0	12	14	0
Rab5b	10	16	19	1	21	14	0
Cryba1	11	0	0	0	0	0	0
Dnmt3l	10	0	0	0	0	0	0
Aire	10	0	0	0	0	0	0
Icosl	10	1	1	0	3	0	0
Spg7	8	19	11	0	16	23	0
Sult5a1	8	1	0	0	1	0	0
Rpl13	8	200	205	0	177	145	1
Chmp1a	8	13	13	0	13	14	0
Rpa1	11	5	8	0	12	12	0
Serpinf1	11	10	6	0	7	6	0
Tubgcp3	8	3	4	0	4	3	0
Oprm1	10	0	0	0	0	0	0
Polr3d	14	1	2	0	7	2	0
Tcf7	11	0	0	0	0	0	0
Ddx3x	X	33	26	0	40	21	0
Il12rb1	8	0	0	0	0	0	0
Slc5a5	8	0	0	0	0	0	0
Kcnn3	3	0	0	0	0	0	0
Usp32	11	7	3	0	4	3	0
Car4	11	7	3	0	7	6	0
Txnrd3	6	4	8	0	3	2	0
Fasl	1	0	0	0	0	0	0
Zfp512b	2	4	2	0	1	4	0
Dnajc5	2	12	11	0	7	13	0
Tpd52l2	2	18	15	0	12	19	0
Fmr1	X	0	5	0	5	6	0
Bcl11a	11	2	1	0	1	0	0
Il4	11	0	0	0	0	0	0
Pxmp4	2	14	12	0	13	7	0
Dlg3	X	1	0	0	2	0	0
Gnb1l	16	0	1	0	2	0	0
Dbh	2	2	3	0	2	1	0
Mmp11	10	1	1	0	0	1	0
Smarcb1	10	3	4	0	6	1	0
Vpreb3	10	0	0	0	0	0	0
Hip1r	5	0	3	0	2	1	0
Nsun5	5	3	2	0	3	1	0
Top1mt	15	1	1	0	0	1	0
Hoxa10	6	0	0	0	0	0	0
Hoxa4	6	0	1	0	0	0	0
Gm38393	7	0	0	0	0	0	0
Mmp14	14	0	4	0	0	2	0
Slc7a7	14	1	0	0	0	0	0
Oxa1l	14	29	24	0	36	31	0
Heatr6	11	1	1	0	1	0	0
Ccl3	11	0	0	0	0	0	0
Wfdc18	11	0	0	0	0	0	0
Icam4	9	0	0	0	0	0	0
Ilf2	3	10	8	0	7	7	0
Chtop	3	26	37	0	25	27	0
Snapin	3	23	17	0	21	24	0
S100a4	3	8	4	0	2	4	0
S100a3	3	0	0	0	0	0	0
S100a5	3	0	0	0	0	0	0
S100a6	3	46	48	0	39	38	0
Scn4a	11	2	3	0	0	1	0
Icam2	11	7	7	0	9	7	0
Mapk7	11	0	0	0	1	4	0
Epn2	11	6	1	0	4	4	0
B9d1	11	1	2	0	3	0	0
Sec24b	3	3	5	0	5	3	0
N4bp3	11	1	0	0	2	1	0
Rmnd5b	11	3	4	0	5	10	0
Nhp2	11	9	12	0	15	7	0
Vps9d1	8	1	7	0	6	3	0
Zfp276	8	1	2	0	1	0	0
C1ql4	15	0	0	0	0	0	0
Mfsd10	5	1	0	0	0	0	0
Luzp1	4	3	2	0	4	2	0
Slc13a2	11	0	0	0	0	0	0
Kctd10	5	5	7	0	9	9	0
Poldip2	11	33	39	0	47	36	0
Sebox	11	0	0	0	0	0	0
Ift20	11	15	17	0	12	6	0
Col6a1	10	4	4	0	10	8	0
Pcbp3	10	0	0	0	0	0	0
Lgals9	11	10	7	0	10	10	0
Araf	X	25	16	1	14	28	0
Cfp	X	3	3	0	4	3	0
Timp1	X	3	3	0	3	1	0
Uxt	X	13	26	0	11	18	0
Cnnm3	1	6	3	0	3	1	0
Lman2l	1	4	10	0	7	11	0
Mcm3ap	10	4	1	0	3	3	0
Pcnt	10	8	10	0	8	7	0
Ftcd	10	0	2	0	0	0	0
Mxd1	6	3	1	0	0	2	0
Gmcl1	6	1	2	0	0	2	0
Snrnp27	6	19	12	0	18	16	0
Oas1c	5	0	0	0	0	0	0
Oas1h	5	0	0	0	0	0	0
Ocrl	X	1	3	0	0	0	0
Calm1	12	74	90	0	87	73	0
Agpat3	10	71	50	0	37	29	0
Slc26a3	12	0	0	0	0	0	0
Sema6b	17	4	6	0	6	4	0
Uhrf1	17	1	1	0	0	0	0
Dpp9	17	8	2	0	11	3	0
Ramp2	11	38	43	0	47	33	0
Lsr	7	0	0	0	0	0	0
Gramd1a	7	2	6	0	5	4	0
Hpn	7	1	0	0	0	0	0
Gabrg1	5	0	0	0	0	0	0
Ckb	12	17	14	1	14	5	0
Sp1	15	3	2	0	5	5	0
Itgb7	15	1	1	0	0	0	0
Myg1	15	5	8	0	9	9	0
Rarg	15	1	3	0	2	1	0
Pfdn5	15	83	80	0	72	62	0
Efnb2	8	2	3	0	4	3	0
Rrp15	1	2	2	0	1	3	0
Rnd2	11	0	0	0	3	0	0
Srr	11	5	7	0	2	4	0
Sync	4	7	1	0	1	6	0
Fndc5	4	71	71	0	76	59	0
Acp5	9	0	0	0	0	0	0
Cnn1	9	0	1	0	0	0	0
Fbxo9	9	7	12	0	10	7	0
Vps50	6	6	4	0	2	7	0
Hars	18	5	10	0	7	7	0
Zmat2	18	10	19	0	13	22	0
Ube2c	2	0	0	0	1	0	0
Smg5	3	12	9	1	4	6	0
Cct3	3	36	35	0	27	35	0
Glmp	3	10	10	0	11	10	0
Mef2d	3	26	18	0	20	24	0
Tmem79	3	0	3	0	1	0	0
Snd1	6	5	4	0	2	9	0
Col18a1	10	0	0	0	0	1	0
Slc19a1	10	1	0	0	1	1	0
Kpnb1	11	18	27	0	22	21	0
Npepps	11	12	13	0	19	14	0
Tbx21	11	0	0	0	0	0	0
Mrpl10	11	22	26	0	17	11	0
Cyp51	5	3	5	0	4	4	0
Tcf25	8	32	30	0	20	22	0
Tubb6	18	6	9	0	2	8	0
Def8	8	9	7	0	11	11	0
Meox1	11	1	1	0	4	4	0
Sost	11	1	0	0	0	1	0
Nkx2-1	12	0	0	0	0	0	0
Pax9	12	0	0	0	0	0	0
Irx2	13	0	3	0	4	2	0
Col1a1	11	7	18	1	13	8	1
Itga3	11	1	0	0	3	0	0
Sgca	11	46	33	0	50	31	0
Dlx3	11	0	0	0	0	0	0
Foxm1	6	0	0	0	0	0	0
Itfg2	6	2	2	0	2	1	0
Nrip2	6	1	0	0	0	1	0
Tulp3	6	0	3	0	5	2	0
Gtf2h4	17	3	5	0	7	5	0
Tubb5	17	21	17	0	26	20	0
Ell2	13	13	9	1	11	15	0
Jup	11	23	26	0	29	30	0
Fkbp10	11	4	5	0	6	3	0
Klhl10	11	0	0	0	0	1	0
Mnx1	5	0	0	0	0	0	0
Nom1	5	3	3	0	1	3	0
Ergic1	17	9	9	0	4	13	0
Tnk1	11	0	0	0	0	1	0
Acap1	11	0	0	0	0	0	0
Tcea3	4	24	20	0	26	21	0
Csn3	5	0	0	0	0	0	0
Ifrd1	12	11	14	0	23	24	0
Stk38l	6	2	1	0	4	5	0
Brpf1	6	3	3	0	0	2	0
Akr1b3	6	59	69	1	66	76	0
Hoxc13	15	0	0	0	0	0	0
Hoxc11	15	0	0	0	0	0	0
Hoxc8	15	0	0	0	0	0	0
Hoxc6	15	0	0	0	0	0	0
Gstt1	10	7	5	0	2	3	0
Gstt3	10	1	1	0	1	0	0
Ddt	10	28	42	0	30	27	0
Tat	8	0	0	0	0	0	0
Marveld3	8	0	0	0	0	0	0
Ddx18	1	4	8	0	3	5	0
Ubl3	5	19	20	0	33	17	0
Gramd3	18	3	10	0	3	2	0
Eef1e1	13	4	8	0	4	8	0
Akt1	12	35	33	0	37	34	1
Cldn15	5	0	3	0	1	1	0
Il16	7	2	1	0	2	1	0
Tcirg1	19	0	0	0	1	1	0
Naglu	11	2	1	0	2	0	0
Coasy	11	2	0	0	1	3	0
Smo	6	2	1	0	4	0	0
Tspan33	6	1	1	0	1	0	0
Crnkl1	2	9	4	0	1	7	0
Rin2	2	1	3	0	4	0	0
Folh1	7	0	0	0	0	0	0
Chordc1	9	10	12	0	11	14	0
Rtcb	10	10	19	0	11	11	0
Pwp1	10	4	2	0	8	7	0
Fbxo7	10	9	4	0	2	3	0
Capns1	7	88	96	0	72	81	0
Lrp3	7	0	0	0	2	4	0
Dsg4	18	0	0	0	0	0	0
Evx2	2	0	0	0	0	0	0
Hoxd13	2	0	0	0	0	0	0
Hoxd12	2	0	0	0	0	0	0
Folr1	7	0	0	0	0	0	0
Clpb	7	18	12	0	8	8	0
Sept7	9	45	48	1	40	34	0
Zdhhc4	5	5	6	0	3	2	0
Rac1	5	39	53	0	39	45	0
Nup214	2	1	0	0	3	2	0
Aif1l	2	0	1	0	0	0	0
Cpa3	3	0	0	0	0	1	0
Ltbp1	17	12	13	0	8	3	0
Ugp2	11	83	105	0	137	94	1
Kcnh6	11	0	0	0	0	0	0
Trmt1	8	2	0	0	1	4	0
Nacc1	8	2	3	0	2	1	0
Nfix	8	9	2	0	7	8	0
Slc1a5	7	4	4	1	3	5	0
Uba1	X	25	21	0	18	16	0
Vwf	6	10	12	0	1	1	0
Siae	9	3	5	0	3	1	0
Vsig2	9	0	2	0	0	1	0
Esam	9	20	17	0	21	15	0
Spa17	9	2	1	0	0	2	0
Fam50a	X	4	5	0	9	3	0
Emd	X	21	22	0	28	20	0
Taco1	11	10	16	0	8	15	0
Grik3	4	0	0	0	0	0	0
Gria3	X	1	0	0	0	0	0
Npas1	7	0	0	0	0	0	0
Sipa1l2	8	3	6	0	5	6	0
Ap4e1	2	0	0	0	0	0	0
Blvra	2	5	10	0	3	3	0
Pdzd4	X	1	0	0	1	0	0
Srpk3	X	5	8	0	6	4	0
Idh3g	X	205	201	0	198	191	1
Pnck	X	2	2	1	2	4	0
Ssr4	X	30	23	0	32	25	0
Bcap31	X	21	22	0	29	14	0
Fam98a	17	9	3	0	14	9	0
Ltbp2	12	0	1	0	1	0	0
Kmt2a	9	4	4	0	3	2	0
Ift46	9	3	4	0	3	2	0
Tmem25	9	2	6	0	3	3	0
Cd3g	9	0	0	0	0	1	0
Trappc6a	7	8	2	0	11	5	0
Supt6	11	4	4	0	6	1	0
Spag5	11	1	0	0	0	0	0
Foxn1	11	0	0	0	0	0	0
Unc119	11	2	1	0	1	1	0
Rab34	11	1	0	0	1	8	0
Sdf2	11	23	21	0	21	18	0
Ccne1	7	0	0	0	1	0	0
Hsf2bp	17	0	0	0	0	0	0
Bbc3	7	0	0	0	2	1	0
Mybpc3	2	405	380	2	468	420	1
Psmc3	2	53	82	0	64	59	2
Acp2	2	6	5	0	5	6	0
Rapsn	2	2	3	0	1	6	0
Slc39a13	2	8	1	0	8	6	0
Celf2	2	14	20	0	16	15	0
Nr1h3	2	11	4	0	7	4	0
Ddb2	2	2	0	0	0	1	0
Spi1	2	0	1	0	1	1	0
Sf3a1	11	7	6	0	3	2	0
Stat6	10	10	7	0	8	6	0
Clgn	8	0	0	0	0	0	0
Napsa	7	0	1	0	0	0	0
Vrk3	7	0	12	0	10	6	0
Smg9	7	1	1	0	0	1	0
Paxip1	5	2	0	0	2	2	0
Rmnd5a	6	23	17	0	21	7	0
Mov10	3	0	0	0	0	1	0
Ppm1j	3	0	8	0	7	4	0
Rhoc	3	12	24	0	36	23	0
Prr27	5	0	0	0	0	0	0
Tead3	17	2	2	0	1	4	0
Ppard	17	2	0	0	1	2	0
Def6	17	0	1	0	0	0	0
Peg3	7	3	0	0	0	0	0
Zim1	7	0	0	0	1	0	0
Metrn	17	15	10	0	9	8	0
Lmf1	17	9	8	0	7	3	1
Narfl	17	10	16	0	20	10	0
Angptl4	17	1	3	0	1	0	0
Dbf4	5	1	0	0	0	0	0
Daxx	17	0	4	0	1	0	0
Cd320	17	8	12	0	10	6	0
Ipo4	14	8	3	0	5	2	0
Tm9sf1	14	18	12	0	17	5	0
Rec8	14	0	0	0	0	0	0
Irf9	14	1	5	0	3	7	0
Gmpr2	14	2	3	0	3	2	0
Mdp1	14	22	18	0	15	20	1
Dhrs1	14	7	20	1	12	15	0
Ncan	8	0	0	0	0	0	0
Tmem161a	8	16	20	0	14	13	0
Armc6	8	3	1	0	2	0	0
Borcs8	8	6	12	0	7	4	0
Slc25a42	8	9	7	0	11	14	0
Snx9	17	15	7	0	4	10	1
Ranbp3	17	9	5	0	3	4	0
Ndufa11	17	339	313	1	348	288	1
Bmp8b	4	0	0	0	0	0	0
Nr2f6	8	13	15	0	13	12	0
Use1	8	65	50	0	48	57	0
Ocel1	8	4	2	0	4	4	0
Dyrk1b	7	3	5	0	0	2	0
Braf	6	4	4	0	4	1	0
Ndufb2	6	306	335	0	290	279	0
Hltf	3	4	4	0	1	0	0
Prpf6	2	8	8	1	15	6	0
Rgs19	2	1	2	0	5	2	0
Rgs20	1	0	0	0	0	0	0
Abhd3	18	1	2	0	2	1	0
Snrpd1	18	9	7	0	13	8	0
Tchp	5	0	0	0	0	0	0
Tiam1	16	0	0	0	0	0	0
Tsc2	17	9	13	0	17	9	0
Rpl3l	17	75	73	0	70	63	0
Slc9a3r2	17	27	29	0	32	28	0
Puf60	15	17	19	0	13	19	0
Golga2	2	10	9	0	7	6	0
Uck1	2	3	4	0	6	5	0
Scin	12	1	1	0	1	1	0
Ikzf4	10	0	0	0	0	0	0
Mien1	11	21	23	0	22	28	0
Pon1	6	0	0	0	0	0	0
Axl	7	24	18	0	11	9	0
Tgfb1	7	7	2	0	5	3	0
Ccdc97	7	6	5	0	2	7	0
Zfp40	17	0	1	0	1	3	0
Akap8l	17	6	4	0	8	4	0
Shh	5	0	0	0	0	0	0
Pdcd2l	7	3	10	0	4	3	0
Gtf2f1	17	1	4	0	3	1	0
Clpp	17	19	38	0	30	29	0
Alkbh7	17	43	38	0	37	29	0
Pspn	17	0	0	0	0	0	0
Dennd1c	17	0	0	0	1	0	0
Med6	12	2	4	0	2	5	0
Prkd1	12	1	0	0	1	1	0
Lcp2	11	0	0	0	0	0	0
Cse1l	2	18	13	0	17	20	0
Naa20	2	25	35	0	29	24	1
Prkra	2	8	11	0	8	1	0
Fkbp7	2	12	13	0	16	11	0
Plekha3	2	8	7	0	6	3	0
Ykt6	11	15	19	0	21	8	0
Baz1b	5	8	6	0	3	16	0
Pex6	17	15	12	0	4	10	0
Mrpl2	17	34	34	0	24	32	0
Mea1	17	9	15	0	11	7	0
Gnmt	17	1	2	0	1	1	0
Grin2d	7	0	0	0	0	0	0
Kdelr1	7	31	37	0	33	39	0
Tmem143	7	9	19	0	16	15	0
Pdxk-ps	17	0	0	0	0	0	0
Ggct	6	6	7	0	4	10	0
Jag2	12	3	2	0	0	5	0
Btbd6	12	4	8	0	8	6	0
Nudt14	12	5	3	0	2	0	0
Epdr1	13	9	6	0	7	3	0
Flii	11	11	7	0	14	9	0
Top3a	11	0	0	0	0	0	0
Atg4d	9	16	21	0	12	17	0
Qtrt1	9	1	1	0	1	1	0
Plin4	17	22	24	0	22	18	0
Hdgfl2	17	1	3	0	2	6	0
Chaf1a	17	0	0	0	0	0	0
Adprh	16	10	12	0	15	15	0
Tmem39a	16	2	3	0	3	5	0
Timmdc1	16	9	9	0	6	8	0
Pla1a	16	5	1	0	8	7	0
Mcm2	6	1	3	0	3	0	0
Tpra1	6	7	6	0	4	0	0
Nab1	1	9	9	0	9	5	0
Adgre5	8	10	10	0	12	5	0
Il17ra	6	0	0	0	1	0	0
Lamb1	12	13	13	0	18	14	0
Kcnn1	8	4	5	0	1	3	0
Arrdc2	8	4	2	0	3	4	0
Ppp1r17	6	0	0	0	0	0	0
Cd36	5	476	528	1	500	480	0
Map2k7	8	12	7	0	8	5	0
Timm44	8	27	17	0	32	28	0
Ap2a2	7	13	7	0	13	4	0
Pnkp	7	4	10	0	8	5	0
Med25	7	5	11	0	12	11	0
Bcam	7	53	43	1	54	48	0
Clptm1	7	18	26	1	15	22	0
Relb	7	0	2	0	10	3	0
Tomm40	7	21	22	0	31	12	0
Apoe	7	60	69	0	56	54	0
Apoc2	7	0	0	0	0	0	0
Hbp1	12	17	24	0	14	19	0
Prkar2b	12	0	0	0	2	2	0
Cdkn1b	6	16	18	0	10	7	0
Klf4	4	11	14	0	17	17	0
Ap1m1	8	7	8	0	13	7	1
Rab8a	8	7	5	0	7	9	0
Hmgn2	4	42	55	0	52	40	0
Fam32a	8	5	8	0	10	9	0
Elf3	1	0	0	0	0	0	0
Cyp2c29	19	0	0	0	0	0	0
Stard3nl	13	7	3	0	6	1	0
Stk11	10	18	23	0	21	18	0
Efna2	10	0	0	0	1	0	0
Atp5d	10	347	361	1	364	291	1
Ppp5c	7	12	19	0	12	26	0
Cdk12	11	2	1	0	2	0	0
Lipe	7	7	6	0	6	6	0
Pafah1b2	9	10	10	0	10	7	0
Tbc1d8	1	3	1	0	1	1	0
Cnot11	1	9	4	0	7	6	0
Slc2a3	6	1	0	0	0	0	0
Foxj2	6	5	3	0	5	8	0
Sri	5	18	11	0	22	18	0
Dgcr2	16	5	13	0	7	5	0
Irf3	7	7	10	0	7	5	0
Bcl2l12	7	2	3	0	5	3	0
Zfp959	17	0	0	0	0	1	0
Mpnd	17	16	8	0	15	8	0
Sh3gl1	17	3	5	0	5	1	0
Ebi3	17	1	0	0	1	1	0
Yju2	17	1	2	0	1	0	0
Ranbp2	10	6	4	0	24	6	0
Edar	10	0	0	0	0	0	0
Grk5	19	3	4	0	5	6	0
Dvl3	16	6	5	0	2	3	0
Abcf3	16	6	6	0	13	7	0
Eif2b5	16	12	11	0	9	9	0
Cyth2	7	6	5	0	3	7	0
Sult2b1	7	0	0	0	0	0	0
Car11	7	0	0	0	4	3	0
Dlgap1	17	0	1	0	0	0	0
Plag1	4	0	0	0	0	0	0
Hck	2	0	0	0	1	0	0
Mrpl4	9	37	45	0	47	38	0
Keap1	9	8	9	0	15	10	0
Ap1m2	9	0	0	0	0	0	0
Glg1	8	23	19	0	18	19	0
Atp8b3	10	0	0	0	0	0	0
Btbd2	10	9	8	0	9	10	0
Csnk1g2	10	20	12	0	18	24	0
Abhd17a	10	12	18	0	14	18	0
Mob3a	10	2	0	0	2	1	0
Cacnb3	15	5	1	0	0	0	0
Ccdc65	15	0	0	0	0	0	0
Fkbp11	15	1	3	0	0	4	0
Ddx23	15	1	2	0	1	6	0
Pld3	7	4	8	0	2	5	0
Grik5	7	1	0	0	1	0	0
Cd79a	7	0	0	0	0	0	0
Rabac1	7	109	130	0	99	84	0
Etv3	3	2	5	0	7	5	0
Prkcsh	9	5	7	0	9	9	0
Elavl3	9	0	0	0	0	0	0
Rab3b	4	0	0	0	0	0	0
St8sia6	2	1	0	0	0	1	0
Fcgrt	7	28	27	0	25	21	0
Nosip	7	9	7	0	14	8	0
Pih1d1	7	8	5	0	11	10	0
Rps11	7	173	155	0	133	118	0
Supt5	7	10	8	0	5	3	0
Dll3	7	0	0	0	0	0	0
Paf1	7	1	2	0	3	3	0
Timm50	7	15	20	0	19	15	0
Med29	7	17	8	0	16	16	0
Bicd1	6	3	1	0	0	1	0
Ncstn	1	7	7	0	11	3	0
Pex19	1	51	45	1	33	29	0
Phyhip	14	5	5	0	3	1	0
Crhr2	6	10	7	0	3	3	0
Inmt	6	4	6	0	0	3	0
Cyp4f18	8	0	0	0	0	0	0
Impdh1	6	1	6	0	6	1	0
Psg18	7	0	0	0	0	0	0
Dusp3	11	5	12	0	28	14	0
Prodh	16	5	7	0	10	4	0
Ess2	16	2	4	0	0	1	0
Slc25a1	16	0	1	0	0	1	0
Dgcr6	16	12	10	0	15	15	0
Ddr1	17	3	3	0	0	1	0
Ier3	17	16	15	0	17	8	0
Fosb	7	1	0	0	1	0	0
Klc4	17	3	4	0	3	5	0
Ercc1	7	6	4	0	6	7	0
Cyp17a1	19	0	0	0	0	0	0
As3mt	19	23	18	0	27	16	0
Homer3	8	2	0	0	6	1	0
Crtc1	8	3	3	0	0	1	0
Rnf215	11	3	6	0	3	2	0
Sec14l2	11	0	0	0	0	0	0
Aven	2	7	2	0	1	8	0
Cp	3	11	19	0	19	13	0
Crot	5	11	12	0	12	5	0
Rps6ka1	4	0	0	0	1	0	0
Calb2	8	0	0	0	0	0	0
Snrnp200	2	15	6	0	21	18	0
Ciao1	2	14	7	0	22	9	0
Has1	17	0	0	0	0	0	0
Taf6l	19	1	0	0	2	1	0
Insig2	1	10	18	0	21	21	0
Kpna6	4	7	13	0	11	13	0
Man1a	10	15	6	0	8	9	0
Itpkc	7	2	0	0	0	0	0
Coq8b	7	1	2	0	1	4	0
Brd8	18	0	6	0	9	1	0
Kif20a	18	1	0	0	1	0	0
Farsa	8	7	1	0	4	8	0
Gcdh	8	21	21	0	28	26	0
Mast2	4	14	17	0	13	4	0
Dnase2a	8	3	1	0	5	3	0
Rad23a	8	28	21	0	19	14	0
Calr	8	58	57	0	65	45	0
Syce2	8	0	1	0	0	0	0
Nfat5	8	9	9	0	9	8	0
Nob1	8	6	9	0	5	5	0
Nqo1	8	12	16	0	24	16	0
Ppfia3	7	0	0	0	0	0	0
Gys1	7	10	18	0	19	11	0
Ruvbl2	7	11	11	0	5	9	0
Lin7b	7	1	0	0	1	0	0
Bax	7	7	15	0	12	11	0
Il7r	15	0	0	0	0	0	0
Tfam	10	18	15	0	24	17	0
Zfp81	17	1	1	0	0	0	0
Efnb3	11	23	35	0	21	12	0
Mmd	11	13	10	0	10	4	0
Hlf	11	6	13	0	4	2	0
Fam162a	16	72	77	0	79	76	0
Rpl8	15	204	188	1	213	185	0
Grm3	5	0	0	0	0	0	0
Ssbp2	13	15	13	0	7	12	0
Fancl	11	2	2	0	0	1	0
Brinp2	1	0	0	0	0	0	0
Gstm5	3	25	22	1	38	27	0
Gstm7	3	8	17	0	9	5	0
Gstm3	3	0	0	0	0	0	0
Stat3	11	9	19	0	22	14	0
Stat5a	11	5	4	0	6	3	0
Cavin1	11	35	35	1	54	44	0
Map3k11	19	4	1	0	7	3	0
Akt2	7	32	38	0	32	33	0
Dnaja3	16	45	41	0	35	34	0
Hmox2	16	16	27	0	26	20	0
Cdip1	16	12	4	0	19	13	0
Map3k20	2	34	27	0	31	37	0
Cwc15	9	26	24	0	19	24	0
Col5a3	9	0	2	0	2	3	0
Dnmt1	9	5	1	0	2	2	0
Ppan	9	1	0	0	0	0	0
Angptl2	2	22	15	0	12	8	0
Cacna1e	1	0	0	0	0	0	0
Cacna1b	2	0	0	0	0	0	0
Trmt10a	3	1	0	0	0	1	0
Etv1	12	4	3	0	1	4	0
Kifc2	15	0	1	0	0	0	0
Psap	10	120	140	0	139	105	1
Ikbkg	X	10	5	0	9	3	0
Pax2	19	0	0	0	0	0	0
Wars2	3	1	3	0	0	1	0
Atn1	6	1	3	0	1	1	0
Phb2	6	68	50	0	49	55	0
Ptpn6	6	1	1	0	1	3	0
Eno2	6	0	0	0	0	0	0
Emg1	6	20	21	0	28	20	0
Lpcat3	6	14	8	0	9	6	1
Atp6v1f	6	38	31	0	28	31	0
Il12b	11	0	0	0	0	0	0
Clcn5	X	1	1	0	0	0	0
Clcn3	8	11	9	0	12	12	0
Hif3a	7	0	1	0	0	0	0
Gpx6	13	0	0	0	0	0	0
Gpx5	13	0	0	0	0	0	0
Pde1c	6	12	12	1	12	13	0
Utp20	10	4	4	0	0	3	0
Spic	10	0	0	0	0	0	0
9330159F19Rik	10	0	0	0	0	0	0
Cul3	1	30	32	0	23	33	0
Sst	16	0	0	0	0	0	0
Il11	7	0	0	0	0	0	0
Large1	8	7	11	0	17	10	0
Ddx56	11	1	8	0	6	7	0
Tmed4	11	39	31	0	31	26	0
Col26a1	5	0	0	0	0	0	0
Bid	6	1	0	0	1	0	0
Ralb	1	3	4	0	10	8	0
Ppp1cc	5	23	29	0	21	30	0
Dnajb11	16	7	12	0	16	11	0
Tbccd1	16	0	4	0	1	7	0
Clec11a	7	1	0	0	0	1	0
Zfp324	7	1	2	0	0	0	0
Gab2	7	9	3	0	2	2	0
Coro1c	5	3	4	0	6	5	0
Tax1bp1	6	27	27	1	21	28	0
Psg17	7	0	0	0	0	0	0
Psg19	7	0	0	0	0	0	0
Ctse	1	1	0	0	0	0	0
Ndrg2	14	245	291	0	281	236	0
Mettl17	14	8	6	0	7	6	0
Arhgef40	14	5	5	0	3	3	0
Pnpla6	8	1	0	0	2	1	0
Mcoln1	8	3	5	0	7	6	0
Arhgef18	8	0	4	0	0	3	0
Pkn2	3	6	5	0	8	5	0
Cd33	7	2	3	0	1	3	0
Etfb	7	347	317	2	336	297	0
Nkg7	7	0	0	0	0	0	0
Stxbp2	8	0	1	0	0	1	0
Pcp2	8	0	0	0	0	0	0
Sgce	6	11	12	0	5	5	0
Chn2	6	0	1	0	0	0	0
Wwox	8	2	1	0	0	0	0
Slbp	5	5	4	0	9	2	0
Tyr	7	0	0	0	0	0	0
Ghrhr	6	0	0	0	0	0	0
Aqp1	6	75	63	0	57	60	0
Arid3b	9	0	0	0	0	0	0
Cnn2	10	5	16	0	18	11	0
Polr2e	10	31	40	0	32	34	0
Abca13	11	0	0	0	0	0	0
Myo9b	8	2	0	0	2	3	0
Hdac9	12	3	3	0	1	1	0
Ly9	1	0	0	0	0	0	0
Cd244a	1	0	0	0	0	0	0
Adgre1	17	3	5	0	1	2	0
Mtfp1	11	53	50	0	54	38	0
Rab23	1	0	3	0	4	1	0
Rab11a	9	36	42	0	41	35	0
Eif2b2	12	8	11	0	10	7	0
Dlst	12	134	133	1	117	113	0
Pgf	12	1	1	0	0	4	0
Ulk2	11	8	18	0	15	12	0
Ccl24	5	0	1	0	1	1	0
Dgkq	5	1	1	0	3	1	0
Tmed11	5	0	0	0	0	0	0
Grap	11	0	1	0	0	2	0
Pou1f1	16	0	0	0	0	0	0
Chmp2b	16	17	16	1	18	11	0
Plod3	5	4	4	0	8	3	0
Ap1s1	5	4	8	0	10	6	0
Mapk13	17	0	0	0	0	0	0
Srpk1	17	3	4	0	3	3	0
Pax3	1	0	0	0	0	0	0
Lbr	1	4	7	0	10	8	0
Crabp2	3	0	0	0	0	0	0
Nes	3	3	2	0	4	9	0
Bcan	3	0	0	0	0	0	0
Hapln2	3	0	0	0	0	0	0
Prcc	3	5	3	0	5	4	0
Rrnad1	3	2	2	0	3	2	0
Hdgf	3	22	25	0	26	13	0
Slc25a18	6	0	0	0	1	0	0
Thop1	10	3	5	0	4	1	0
Apba3	10	15	10	0	14	14	0
Matk	10	0	0	0	0	0	0
Pias4	10	2	4	0	4	5	0
Map2k1	9	15	9	0	7	9	0
Sgta	10	15	15	0	19	15	0
Nmrk2	10	3	2	0	8	0	0
Tmem242	17	33	30	0	50	38	0
Dtx2	5	4	4	0	2	0	0
Zp3	5	0	0	0	0	0	0
Hspb1	5	97	76	0	93	93	0
Rasa4	5	1	0	0	2	1	0
Syt5	7	0	1	0	0	0	0
Hnrnpa2b1	6	142	128	0	143	125	1
Fxyd4	6	0	0	0	0	0	0
Ccdc130	8	2	3	0	1	0	0
Mri1	8	4	5	0	10	3	0
Prkacb	3	12	13	0	16	13	0
Sgsh	11	2	0	0	1	1	0
Chd5	4	0	0	0	0	0	0
Cstb	10	17	17	0	21	13	0
Sh2b2	5	0	0	0	0	0	0
Pex5	6	6	5	0	4	3	0
Jkamp	12	8	8	0	12	9	0
Cd44	2	4	3	0	2	0	0
Slc1a2	2	0	0	0	0	0	0
Eif2ak4	2	6	5	0	2	6	0
Wdr1	5	23	28	0	30	36	0
Slc2a9	5	0	0	0	1	0	0
Ccn4	15	0	0	0	0	0	0
Ndrg1	15	5	7	0	7	8	0
4930550C14Rik	9	0	0	0	0	0	0
Man2b1	8	5	6	0	6	8	0
Klf5	14	0	0	0	0	0	0
Wdr83	8	10	9	0	12	7	0
Prdx2	8	216	191	1	172	180	0
Polr2a	11	4	4	0	2	4	0
Shbg	11	0	0	0	0	0	0
Senp3	11	5	7	0	7	6	0
Corin	5	58	39	0	27	24	0
Plekha8	6	5	1	0	1	2	0
G6pc2	2	0	0	0	0	0	0
Spc25	2	0	0	0	1	0	0
Dnah2	11	0	0	0	0	0	0
Ripk4	16	0	0	0	0	0	0
Ufd1	16	16	8	0	15	14	0
Zfp287	11	2	1	0	1	0	0
Prlr	15	1	1	0	1	2	0
Letm1	5	23	17	0	11	15	0
Ubqln1	13	9	12	0	18	12	0
Fgfr4	13	0	0	0	0	0	0
Cadm3	1	1	0	0	0	0	0
Fcer1a	1	0	0	0	0	0	0
Txn2	15	76	106	0	81	83	0
Casp14	10	0	0	0	0	0	0
Slc1a6	10	0	0	0	0	0	0
Slc1a3	15	0	1	0	1	1	0
Crbn	6	9	8	0	15	10	0
Il5ra	6	0	0	0	0	0	0
Msh6	17	3	0	0	0	2	0
Fbxo11	17	9	8	0	7	9	0
Mlxipl	5	6	2	0	0	4	0
Tbl2	5	5	3	0	1	2	0
Bud23	5	5	5	0	8	3	0
Nid1	13	24	30	0	23	21	0
Mcm5	8	0	1	0	0	0	0
Hmox1	8	2	1	0	3	3	0
Mprip	11	17	20	0	18	12	0
Cic	7	4	3	0	8	4	0
Pafah1b3	7	0	0	0	2	1	0
Il27ra	8	0	1	0	1	0	0
Prkaca	8	68	59	0	60	78	0
Asf1b	8	0	0	0	1	0	0
Myl10	5	0	0	0	0	0	0
Ddx39	8	6	2	0	3	5	0
Dnajb1	8	3	8	0	6	8	0
Msh4	3	0	0	0	0	0	0
Usp40	1	7	3	0	5	5	0
Evx1	6	0	0	0	0	0	0
Kbtbd4	2	4	2	0	3	2	0
Celf1	2	16	19	0	23	16	0
Ndufs3	2	241	252	1	215	214	0
Por	5	11	16	0	16	16	0
Igf1r	7	2	4	0	4	3	0
Insr	8	15	24	0	23	18	0
Fcer2a	8	0	0	0	0	1	0
Cyp2a5	7	0	0	0	0	0	0
Atp4a	7	0	0	0	0	0	0
Trim28	7	14	10	0	10	6	0
Ube2m	7	73	63	0	71	69	0
Adcy9	16	0	3	0	0	0	0
Mef2c	13	13	12	0	6	15	0
Ctr9	7	4	2	0	2	1	0
Eif4g2	7	167	180	1	175	160	0
Mrvi1	7	1	1	0	2	1	0
Pcyt1a	16	21	10	0	16	11	0
Zfp592	7	4	6	0	2	3	0
Psmd4	3	26	32	0	29	22	0
Tmod4	3	16	6	0	8	7	0
Insrr	3	0	0	0	0	0	0
Cabp5	7	0	0	0	0	0	0
Snx6	12	6	8	0	8	12	0
Mthfd2	6	0	1	0	0	1	0
Kit	5	1	0	0	2	0	0
Tomm40l	1	27	27	0	21	18	0
Nr1i3	1	0	0	0	0	0	0
Apoa2	1	1	0	0	2	2	0
Pan2	10	0	1	0	2	1	0
Cs	10	274	289	0	246	258	0
Ampd3	7	7	11	0	19	7	0
Bcas2	3	21	16	1	16	16	1
Sh2d1a	X	0	6	0	0	0	0
Ctcf	8	6	8	0	5	7	0
Pard6a	8	4	3	0	2	3	0
Agrp	8	0	0	0	0	0	0
Pvalb	15	0	0	0	0	0	0
Tfap4	16	1	2	0	0	0	0
Ranbp1	16	11	9	0	17	13	0
Cd247	1	0	0	0	0	0	0
Rfx5	3	0	1	0	1	1	0
Psmb4	3	87	93	0	76	80	0
Mmp8	9	0	0	0	0	0	0
Slc30a4	2	1	3	0	5	4	0
Sqor	2	11	21	0	15	15	0
Bloc1s6	2	14	9	0	15	6	0
Metap1	3	10	5	0	14	9	0
Gpr108	17	9	6	0	7	4	0
Tnfsf14	17	0	0	0	0	1	0
Gata6	18	18	11	0	16	19	0
Rsl1d1	16	24	18	0	17	17	0
Cnga2	X	0	0	0	0	0	0
Apc	18	5	5	0	5	6	0
Reep5	18	134	131	2	111	114	0
Ergic3	2	11	9	0	12	11	0
Uqcc1	2	41	64	0	48	51	0
Spo11	2	0	0	0	0	0	0
Ncoa2	1	6	11	0	10	6	0
Prl4a1	13	0	0	0	0	0	0
Trh	6	0	0	0	0	0	0
Nr2c2	6	6	6	0	5	4	0
Nr2c1	10	2	1	0	2	1	0
Smpd4	16	6	0	0	2	1	0
Pex1	5	0	1	0	1	1	0
Otx1	11	0	0	0	0	0	0
Kctd20	17	7	4	0	5	6	0
Itgae	11	0	0	0	0	0	0
Ctns	11	2	1	0	4	1	0
P2rx5	11	0	2	0	6	1	0
Shpk	11	1	0	0	1	0	0
Trpv1	11	0	0	0	0	0	0
Ephb3	16	2	3	0	1	2	0
Tuft1	3	0	1	0	0	0	0
Rcn1	2	9	10	0	6	10	0
Dnase1	16	0	0	0	0	0	0
Trap1	16	34	39	0	35	30	0
Naa60	16	5	7	0	8	9	0
1700037C18Rik	16	2	0	0	0	1	0
Ankrd13d	19	0	0	0	0	0	0
Tyrp1	4	0	0	0	0	0	0
Tpr	1	7	22	0	10	11	0
Pdc	1	0	0	0	0	0	0
Odr4	1	6	17	0	5	16	0
Prg4	1	0	1	0	0	0	0
Dhx34	7	1	2	0	1	0	0
Kptn	7	9	5	0	9	4	0
Napa	7	22	27	0	37	24	0
Sra1	18	24	25	0	19	12	0
Calcoco2	11	0	0	0	0	0	0
Atp5g1	11	1165	1139	3	1041	906	1
Snf8	11	18	9	0	13	17	0
Tbcb	7	24	13	0	21	16	0
Inpp5k	11	6	7	0	5	5	0
Crkl	16	5	5	0	2	7	0
Upk3bl	5	0	0	0	0	0	0
Eps8l1	7	0	0	0	1	0	0
Clint1	11	11	13	0	14	11	0
Prss16	13	0	0	0	0	0	0
Cdkal1	13	2	0	0	7	4	0
Rhox6	X	0	0	0	0	0	0
5430419D17Rik	7	0	0	0	0	0	0
Htra1	7	17	33	0	25	22	0
Zbtb17	4	2	7	0	5	2	0
Clcnkb	4	0	2	0	0	2	0
Fam131c	4	0	0	0	1	0	0
Fblim1	4	49	51	1	61	48	0
Hspb7	4	448	454	3	565	500	0
Epor	9	2	0	0	0	0	0
Ccdc159	9	0	0	0	0	0	0
Mob1b	5	6	12	0	11	6	0
Atp6v1b1	6	0	0	0	0	0	0
Vax1	19	0	0	0	0	0	0
Atp6v1b2	8	21	24	0	31	16	0
Eps15l1	8	9	7	0	5	4	0
Tep1	14	3	0	0	3	1	0
Ttc5	14	0	1	0	3	2	0
Osgep	14	20	21	0	26	9	0
Aamp	1	26	24	1	31	29	0
Tmbim1	1	11	11	0	9	14	0
Arpc2	1	50	49	0	38	54	0
Kmt2b	7	3	1	0	4	3	0
Zbtb32	7	0	0	0	0	0	0
Etv2	7	0	0	0	0	0	0
Upk1a	7	0	0	0	0	2	0
Tmem147	7	56	51	1	71	62	0
Rps9	7	261	276	2	245	193	0
Tfpt	7	4	1	0	3	1	0
Susd2	10	0	0	0	0	0	0
Ggt5	10	2	3	0	0	0	0
Ggt1	10	0	0	0	0	0	0
Crip2	12	376	389	0	316	308	0
Crip1	12	59	62	0	65	45	1
Cbfa2t3	8	0	0	0	2	0	0
Fbln1	15	23	21	0	13	8	0
Pgrmc1	X	5	7	0	5	5	0
Gcat	15	5	5	0	5	2	0
Tek	4	8	10	0	2	8	0
Mpl	4	0	0	0	0	0	0
Elovl1	4	5	3	0	3	4	0
Med8	4	8	4	0	7	5	0
Hyi	4	1	0	0	1	0	0
Cdc20	4	0	0	0	0	1	0
Adamts4	1	0	0	0	1	0	0
Nectin4	1	0	2	0	0	0	0
Pfdn2	1	15	21	0	19	19	0
Rnf114	2	28	24	0	30	18	0
C330007P06Rik	X	11	7	0	5	2	0
Neurl1a	19	0	0	0	2	1	0
Srm	4	1	4	0	2	4	0
Epha2	4	1	0	0	1	4	0
Rbm14	19	0	2	0	6	5	0
Actn3	19	0	0	0	0	0	0
A530013C23Rik	2	0	2	0	0	1	0
Zdhhc24	19	0	1	0	1	0	0
Bbs1	19	0	0	0	0	0	0
Slc34a3	2	0	0	0	0	0	0
Ndor1	2	1	1	0	0	0	0
Nsmf	2	1	0	0	2	1	0
Prl7a1	13	0	0	0	0	0	0
Prl8a9	13	0	0	0	0	0	0
Pdk1	2	24	24	0	30	15	0
Ptbp1	10	6	8	0	6	9	0
Mvd	8	1	0	0	1	0	0
Cyba	8	16	13	0	15	12	0
Itih3	14	0	0	0	0	0	0
Tmem110	14	1	1	0	5	0	0
Sfmbt1	14	3	1	0	3	3	0
Itih1	14	0	0	0	0	0	0
Ihh	1	0	0	0	0	0	0
Prkag3	1	3	0	0	0	0	0
Cryba2	1	0	0	0	0	0	0
Atp7b	8	0	0	0	0	0	0
Defb2	8	0	0	0	0	0	0
Slc4a1	11	0	1	0	0	0	0
Rundc3a	11	0	0	0	0	0	0
Slc4a3	1	24	24	0	19	15	0
Cdt1	8	0	0	0	1	0	0
Runx1t1	4	1	0	0	0	2	0
Snai3	8	1	1	0	0	1	0
Aprt	8	6	12	0	8	4	0
Gtf2h1	7	6	5	0	3	2	0
Hfe	13	18	21	0	13	12	0
Abhd1	5	3	0	0	3	1	0
Slc5a6	5	3	6	0	2	2	0
Tcf23	5	2	1	0	0	0	0
Nphs1	7	0	0	0	0	0	0
Aplp1	7	0	1	0	0	0	0
Qrich1	9	11	7	0	9	9	0
P4htm	9	2	5	0	4	2	0
Usp19	9	16	14	0	10	13	0
Pola1	X	0	1	0	3	3	0
Cdc42	4	65	69	0	61	70	0
Pknox1	17	3	4	0	2	1	0
D130043K22Rik	13	0	0	0	0	0	0
Gmnn	13	10	26	0	18	14	0
Acot13	13	200	208	1	208	172	0
Zfp184	13	0	0	0	0	0	0
Cyp27b1	10	0	0	0	0	0	0
Cdk4	10	21	16	0	16	11	0
B4galnt1	10	0	0	0	0	0	0
Mettl1	10	2	3	0	6	2	0
Tspan31	10	11	13	0	11	9	0
Kif5b	18	22	28	0	40	20	0
Saal1	7	0	0	0	2	1	0
Tph2	10	0	0	0	0	0	0
Krt23	11	0	0	0	0	0	0
Cnp	11	3	2	0	3	0	0
Ttc25	11	0	0	0	0	0	0
Sulf2	2	9	9	0	10	13	0
Sod2	17	323	303	2	299	226	1
Tmco6	18	0	1	0	1	0	0
Stambp	6	2	8	0	8	5	0
Ezh1	11	10	7	0	8	4	0
Hap1	11	0	0	0	0	0	0
P3h4	11	11	6	0	4	9	0
Ctnnb1	9	56	62	0	62	55	0
Eif1b	9	33	20	0	23	25	0
Klk4	7	0	0	0	0	0	0
Chrd	16	0	1	0	0	0	0
Psmd2	16	28	39	0	43	30	1
Syngr3	17	0	0	0	0	0	0
Vars	17	1	4	0	4	4	0
Vwa7	17	0	2	0	0	1	0
Hspa1l	17	1	0	0	3	3	0
Slc44a4	17	0	0	0	0	0	0
Msh5	17	0	0	0	0	0	0
Abhd16a	17	12	13	0	7	11	0
Neu1	17	6	5	0	6	4	0
Ddah2	17	6	8	0	8	7	0
Clic1	17	16	12	0	18	16	0
Lsm2	17	5	6	0	5	2	0
Pole	5	0	0	0	0	0	0
Atp1a2	1	110	106	1	130	87	0
Atp1a4	1	0	0	0	0	0	0
Casq1	1	1	1	0	3	3	0
Stx1a	5	0	0	0	0	0	0
Ceacam9	7	0	0	0	0	0	0
Zfp775	6	0	2	0	3	0	0
Scube2	7	3	6	0	10	5	0
Mrpl49	19	14	22	0	13	9	0
Dennd2c	3	0	0	0	0	1	0
Mark3	12	13	1	0	17	11	0
Gatad1	5	28	23	0	43	24	0
Pcdha11	18	0	0	0	0	0	0
2310003L06Rik	5	0	0	0	0	0	0
M6pr	6	16	17	0	17	14	0
Lrrc8a	2	8	6	0	12	8	0
Mc5r	18	0	0	0	0	0	0
Ppp2r1a	17	55	40	0	45	41	0
Fance	17	4	1	0	2	2	0
Tinf2	14	3	3	0	5	3	0
Tssk4	14	0	0	0	0	0	0
Hapln4	8	0	0	0	0	0	0
Dus3l	17	1	3	0	5	6	0
Gtpbp3	8	2	5	0	1	4	0
Tgfbr1	4	3	1	0	3	1	0
Homer1	13	8	8	0	15	8	0
Rad51c	11	0	1	0	0	1	0
Gabrb2	11	0	0	0	0	0	0
Cav1	6	51	50	0	49	55	0
Arpp19	9	55	35	0	37	43	0
Bcl2l1	2	5	5	0	11	10	0
Khsrp	17	1	4	0	4	2	0
Dio2	12	0	0	0	0	1	0
Ccdc124	8	13	19	0	29	17	0
Cct4	11	42	50	0	42	34	0
0610009B22Rik	11	18	7	0	16	13	0
Cpt1c	7	0	0	0	0	1	0
Twist2	1	1	1	0	0	0	0
Zfp655	5	7	10	0	6	10	0
Rhoa	9	84	90	0	73	75	0
Zmiz1	14	8	8	0	6	8	0
Ankrd26	6	0	0	0	0	0	0
Aldh16a1	7	1	2	0	3	3	0
Hnrnpa0	13	33	30	0	36	35	0
Prrg2	7	1	2	0	2	1	0
Hnrnph1	11	33	48	1	54	36	0
Ift43	12	8	12	0	13	7	0
Id3	4	25	33	0	36	33	0
Tcap	11	307	320	0	301	226	2
Arid1a	4	3	7	0	4	6	0
Crlf1	8	1	0	0	0	0	0
Ctsd	7	244	283	2	312	245	1
Rplp1	9	592	545	3	523	504	0
Cabs1	5	0	0	0	0	0	0
Hmgcll1	9	0	0	0	0	0	0
Ttc9b	7	0	0	0	0	0	0
Phox2a	7	1	0	0	0	0	0
Abhd8	8	5	4	0	6	3	0
Ift22	5	2	3	0	6	3	0
Fzd3	14	0	3	0	0	0	0
1700008O03Rik	7	1	0	0	0	0	0
Mid1ip1	X	31	37	0	31	18	0
Ap2s1	7	20	24	0	19	20	0
Fgfrl1	5	1	2	0	2	2	0
4930432K21Rik	8	0	0	0	0	0	0
Fhl2	1	719	668	1	794	702	1
Emc10	7	37	33	0	29	33	1
Clstn3	6	0	0	0	0	0	0
Fbxw9	8	0	0	0	4	1	0
Spib	7	0	0	0	0	0	0
Fnbp4	2	3	4	0	4	3	0
Cers4	8	11	4	0	11	2	0
Scrn3	2	8	7	0	10	9	0
Phax	18	5	5	0	9	6	0
Tle1	4	2	1	0	3	3	0
1700109H08Rik	5	1	0	1	0	1	0
Relt	7	2	0	0	2	0	0
Snrpb2	2	12	7	0	13	7	0
Ubc	5	131	152	0	148	125	0
Prpf31	7	2	7	0	3	6	0
Sertad1	7	1	4	0	3	6	0
Carhsp1	16	4	6	0	10	7	0
Elk3	10	4	4	0	6	10	0
Herpud2	9	14	12	0	10	11	0
Rdh13	7	4	8	0	5	4	0
Adam21	12	0	0	0	0	0	0
Nutf2	8	19	20	0	16	18	0
Fut1	7	0	0	0	0	0	0
Arpc5	1	20	11	0	23	12	0
Rnf151	17	0	0	0	0	0	0
Elavl2	4	0	0	0	0	0	0
Pou2f2	7	0	0	0	0	1	0
Mgst1	6	52	45	0	37	30	0
Nfib	4	28	20	0	21	18	0
Htr3b	9	0	0	0	0	0	0
Rab25	3	0	0	0	1	0	0
Ubqln4	3	8	13	0	10	6	0
Rbfox1	16	6	17	0	6	10	0
Rps18	17	195	185	2	170	147	0
Rpl10	X	21	14	0	18	15	0
Rps15a	7	191	196	0	168	123	0
Ncaph2	15	11	7	0	11	10	0
Hipk1	3	20	16	0	13	10	0
Gprc5b	7	3	4	0	3	3	0
Man1a2	3	2	3	0	6	0	0
Ceacam5	7	0	0	0	0	0	0
Tppp2	14	0	0	0	0	0	0
Acyp1	12	9	12	0	10	9	0
Cldn13	5	0	0	0	0	0	0
Cd163	6	2	7	0	5	5	0
Hdac5	11	5	10	0	12	9	1
Rala	13	23	15	0	15	16	0
Clec3a	8	0	0	0	0	0	0
Vdac3	8	118	123	0	111	103	0
Slc1a7	4	2	0	0	4	0	0
Vps72	3	2	2	0	2	2	0
Gabpa	16	5	9	0	8	15	0
Bmp7	2	1	0	0	0	0	0
Dynll1	5	29	17	0	31	20	0
Pdcl	2	6	5	0	5	2	0
Tmem184b	15	5	7	0	4	3	0
Gm5965	16	0	0	0	0	0	0
Rsph14	10	0	0	0	0	0	0
Nf2	11	12	14	0	10	12	0
Cabp7	11	0	0	0	0	0	0
Zmat5	11	13	12	0	14	4	0
Ewsr1	11	11	20	0	16	12	0
Ap1b1	11	11	14	0	13	6	0
Derl3	10	1	0	0	0	0	0
Gstt4	10	0	0	0	0	0	0
Tbx1	16	0	1	0	0	0	0
Gnat2	3	0	0	0	0	0	0
Bcl2l13	6	18	13	0	17	18	0
2610028H24Rik	10	0	0	0	0	0	0
Spatc1l	10	0	0	0	0	0	0
Dqx1	6	0	0	0	0	0	0
Ccl8	11	0	1	0	0	0	0
Lnpk	2	2	1	0	5	1	0
Prr29	11	0	0	0	0	0	0
Mymk	2	0	0	0	0	0	0
Fam163b	2	0	0	0	0	0	0
Trpm5	7	0	0	0	0	0	0
Ascl2	7	0	0	0	0	0	0
Rarres2	6	14	11	0	16	14	0
Pttg1ip	10	40	31	1	37	21	0
Trpm2	10	0	0	0	0	0	0
Ube2g2	10	27	20	0	32	17	0
Mpo	11	0	0	0	0	0	0
Lpo	11	0	0	0	0	0	0
Met	6	0	0	0	0	0	0
Slc16a12	19	1	0	0	0	0	0
Syn2	6	0	0	0	2	0	0
Elk1	X	1	3	0	4	1	0
Nav1	1	2	1	0	2	5	0
Tnpo1	13	9	10	0	11	14	0
Myod1	7	0	0	0	0	0	0
Otog	7	0	0	0	0	0	0
Rnmt	18	4	5	0	3	2	0
Kcnq1	7	3	7	0	10	6	0
Srp14	2	36	45	1	41	39	0
6330409D20Rik	2	0	0	0	0	0	0
Cdk9	2	4	9	0	5	3	0
Tor2a	2	1	3	0	1	4	0
Fpgs	2	0	0	0	0	1	0
Mrtfb	16	5	4	0	3	1	0
Cbx5	15	11	11	0	13	8	0
Odam	5	0	0	0	0	0	0
Apobec3	15	1	0	0	1	1	0
St6galnac1	11	0	0	0	0	0	0
Taf7l	X	0	0	0	0	0	0
Sardh	2	0	1	0	2	0	0
Vav2	2	3	4	0	2	1	0
Tex15	8	0	0	0	0	0	0
Ppp2cb	8	18	22	1	23	18	0
G0s2	1	22	25	0	18	22	0
Dmap1	4	8	3	0	2	5	0
Pla2g12b	10	0	0	0	0	0	0
Mcu	10	2	2	0	4	1	0
Oit3	10	0	0	0	0	0	0
Tex11	X	0	0	0	0	0	0
Bcr	10	2	2	0	1	1	0
Fxyd5	7	7	14	0	7	7	0
Kcnd1	X	0	0	0	0	0	0
Tfcp2	15	1	3	0	0	0	0
Pou6f2	13	0	0	0	0	0	0
Pou6f1	15	0	1	0	2	1	0
Ubp1	9	9	6	0	3	8	0
Nuak2	1	1	2	0	1	0	0
Ick	9	3	4	0	3	1	0
Sdhb	4	586	611	4	530	491	1
Cox4i2	2	1	2	0	5	7	0
Snap47	11	7	14	0	9	15	0
Wnt3a	11	0	0	0	0	0	0
Kdsr	1	5	4	0	1	4	0
Vps4b	1	16	7	0	7	9	0
Rps25	9	187	204	1	175	158	0
Nxf2	X	0	0	0	0	0	0
Taz	X	18	14	0	12	16	0
Kif19a	11	0	0	0	0	0	0
Aldh3a2	11	6	7	0	5	2	0
Zmynd10	9	0	0	0	0	0	0
Tmem115	9	8	7	0	2	6	0
Hyal2	9	5	8	0	9	7	0
Ifrd2	9	7	10	0	11	6	0
Hyal1	9	0	0	0	0	0	0
Tusc2	9	12	6	0	14	10	0
Nprl2	9	5	2	0	3	7	0
Slc38a3	9	13	13	0	15	11	0
Cacna2d2	9	0	0	0	0	1	0
Rassf1	9	7	6	0	5	0	0
Epn3	11	2	4	0	6	4	0
Rnf112	11	0	0	0	0	0	0
Slc3a2	19	9	7	0	7	3	0
Nxf1	19	2	7	0	4	4	0
Stx5a	19	7	5	0	3	4	0
Slc47a1	11	7	18	0	13	8	0
Pifo	3	0	0	0	0	0	0
Tnfrsf13b	11	0	0	0	0	0	0
Spire2	8	0	0	0	0	0	0
Prox1	1	8	2	0	14	12	0
Raver1	9	0	0	0	0	0	0
2610507B11Rik	11	35	20	0	31	29	0
AI597479	1	10	7	0	9	3	0
Tmem86a	7	10	9	0	9	5	0
Optc	1	0	0	0	0	0	0
Tex14	11	0	0	0	0	0	0
Ifi35	11	3	6	0	9	7	0
Rdm1	11	10	24	0	18	17	0
Nedd8	14	40	45	0	52	41	0
Gosr1	11	2	5	0	6	7	0
Mrpl52	14	52	36	0	31	36	0
Spaca7	8	0	0	0	0	0	0
Kansl3	1	7	9	0	1	9	0
Eya4	10	0	0	0	0	0	0
Ebf3	7	0	1	0	14	8	0
Uckl1os	2	5	0	0	2	0	0
Myt1	2	0	0	0	0	0	0
Faf1	4	21	21	0	15	16	0
Gm266	12	0	0	0	0	0	0
Tsacc	3	1	2	0	0	2	0
Mettl16	11	4	4	0	6	4	0
Dazl	17	1	0	0	0	0	0
Apol7a	15	0	0	0	0	0	0
Pigyl	9	15	8	1	14	12	0
Rbm25	12	7	6	0	7	4	0
Psen2	1	2	3	0	2	1	0
Acaa1b	9	0	0	0	0	0	0
Plcd1	9	3	0	0	8	7	0
Fads1	19	3	4	0	4	4	0
Lmbr1	5	4	5	0	9	3	0
Tnfrsf22	7	0	0	0	0	0	0
Cars	7	2	5	0	1	1	0
Phlda2	7	0	0	0	0	0	0
Asz1	6	0	0	0	0	0	0
Wnt2	6	0	0	0	0	0	0
Gabra1	11	0	0	0	0	0	0
Grid2ip	5	0	0	0	0	0	0
Kdelr3	15	3	2	0	2	0	0
Cfap97d1	11	0	0	0	0	0	0
Apip	2	33	29	0	44	30	0
Pdhx	2	39	48	0	50	37	0
Vac14	8	6	4	0	5	1	0
Mcoln2	3	0	0	0	0	0	0
Slc5a1	5	0	0	0	1	0	0
Akt1s1	7	21	17	0	14	17	0
Tbrg1	9	11	10	0	12	6	0
Panx3	9	0	0	0	0	0	0
Adssl1	12	47	29	0	38	36	0
Cfap161	7	0	0	0	0	0	0
Brf1	12	1	3	0	6	1	0
Vipr2	12	1	1	0	0	0	0
Odc1	12	24	22	0	24	15	0
Thg1l	11	0	0	0	1	0	0
Adam19	11	1	0	0	2	4	0
Pabpc4	4	74	55	0	79	101	0
Exoc3l2	7	0	0	0	0	0	0
Zfp296	7	0	0	0	2	1	0
Plin5	17	36	37	0	29	25	0
Sugp1	8	3	4	0	2	4	0
Dmrtc2	7	0	0	0	0	0	0
Gm5893	7	0	0	0	0	0	0
Dhdh	7	5	1	0	5	2	0
Zfp790	7	0	1	0	1	2	0
Cpb1	3	0	0	0	0	0	0
Slc25a41	17	0	0	0	0	0	0
Fsd1	17	0	0	0	0	0	0
Pinlyp	7	0	0	0	0	0	0
Fuz	7	3	2	0	0	0	0
Sptbn4	7	0	0	0	0	0	0
Pgam1	19	18	18	0	12	25	0
Evi5	5	5	2	0	6	8	0
Evi5l	8	1	2	0	2	1	0
Snapc2	8	7	6	0	1	6	0
Git1	11	8	9	0	6	14	1
Gltp	5	4	5	0	3	4	0
Bnip2	9	12	16	0	19	12	0
Ccnt1	15	3	2	0	3	1	0
Scarf2	16	1	2	0	2	1	0
4930579F01Rik	3	0	0	0	0	0	0
Brms1l	12	4	8	0	6	2	0
Med15	16	1	3	0	2	5	0
Dhdds	4	4	7	0	4	5	0
Crybg2	4	0	0	0	0	0	0
Ubxn11	4	1	0	0	0	0	0
Mogat1	1	0	0	0	0	1	0
Tex22	12	0	0	0	0	0	0
Wnt8a	18	0	0	0	0	0	0
Tjap1	17	6	3	0	1	3	0
Ehf	2	0	0	0	0	0	0
Nanog	6	0	0	0	0	0	0
Rpl15	14	49	51	0	49	40	0
Tmem167	13	13	7	0	15	12	0
Steap4	5	10	8	0	12	6	0
Mplkip	13	5	3	0	4	1	0
Kif11	19	1	0	0	1	0	0
Rpa3	6	3	8	0	9	3	0
Mlkl	8	2	0	0	2	0	0
Phox2b	5	0	0	0	0	0	0
Tnpo3	6	7	9	0	8	6	0
Ttll5	12	0	1	0	0	0	0
Zfp715	7	3	2	0	5	3	0
Retn	8	0	0	0	0	0	0
Acp4	7	0	0	0	0	0	0
Cdh23	10	0	0	0	0	0	0
Rps5	7	223	239	1	219	205	1
Podnl1	8	0	0	0	0	0	0
Adgrl1	8	1	2	0	1	0	0
Amotl1	9	6	6	0	7	5	0
2200002J24Rik	7	0	0	0	0	0	0
Etv5	16	6	2	0	1	7	0
Tmem190	7	0	0	0	0	0	0
Gfod2	8	0	0	0	1	1	0
Enkd1	8	0	0	0	0	0	0
4933405L10Rik	8	0	0	0	0	0	0
Atp6v0d1	8	12	12	0	9	10	0
Ptprs	17	4	5	0	3	2	0
Slc41a1	1	8	13	0	12	9	0
Fer1l4	2	0	0	0	0	0	0
4931406B18Rik	7	0	0	0	0	0	0
Iglon5	7	0	0	0	0	0	0
Igf2bp1	11	0	0	0	0	0	0
B4galnt2	11	0	0	0	0	0	0
Zfp651	9	15	10	1	11	10	0
Nelfb	2	5	11	0	8	6	0
Card14	11	0	0	0	0	0	0
Tmem175	5	4	7	0	5	5	0
Bcas1	2	0	0	0	0	0	0
Tango2	16	50	46	0	58	48	0
4833413E03Rik	17	0	0	0	0	0	0
Aldh1a2	9	3	5	0	2	1	0
Ndufs2	1	350	391	0	398	333	1
Snx31	15	0	0	0	0	0	0
Atraid	5	29	32	0	33	25	0
Cad	5	4	1	0	1	0	0
Lypd8	11	0	0	0	0	0	0
Sh3bp5l	11	1	4	0	3	3	0
1810065E05Rik	11	0	0	0	0	0	0
Atad1	19	32	30	0	30	27	0
Pten	19	15	13	0	21	12	0
4933402N03Rik	7	0	0	0	0	0	0
Pea15a	1	14	12	0	17	8	0
Timm23	14	74	65	0	60	61	0
Tnfaip8l2	3	0	4	0	0	0	0
Trnt1	6	7	6	0	6	9	0
Ly6g6e	17	0	0	0	0	0	0
Ehmt2	17	5	6	0	7	6	0
Elof1	9	18	8	0	19	8	0
Med16	10	6	4	0	4	5	0
St3gal1	15	0	3	0	2	2	0
Tmem259	10	13	19	0	25	25	0
Rnf170	8	4	2	2	4	2	1
Clip3	7	0	1	0	3	3	0
Thap8	7	0	0	0	0	0	0
Myl2	5	6202	6394	15	6381	5413	9
Dedd	1	8	10	0	8	3	0
Mcemp1	8	0	1	0	0	0	0
Nit1	1	3	13	0	4	3	0
Pax5	4	0	0	0	0	0	0
Prdm15	16	0	0	0	0	1	0
Rnf168	16	6	2	0	1	3	0
Tctex1d2	16	3	3	0	7	3	0
Chp1	2	31	25	0	25	20	0
Sval2	6	0	0	0	0	0	0
Trpv4	5	3	2	0	10	2	0
Klhl3	13	1	1	0	0	0	0
Tvp23b	11	8	4	0	8	5	0
Dnajc7	11	17	22	0	20	12	0
Zfp385c	11	0	0	0	0	0	0
Cacybp	1	27	28	0	27	21	1
Cluap1	16	5	3	0	4	2	0
Zswim7	11	5	6	0	5	7	0
Pigl	11	0	6	0	2	0	0
Ndufa2	18	363	357	1	336	298	0
Pam16	16	22	18	0	26	9	0
Glis2	16	1	0	0	0	6	0
Cox6c	15	1277	1335	2	1286	1080	4
Bicc1	10	6	4	0	3	6	0
Ube2z	11	9	10	0	3	14	0
Gip	11	0	0	0	0	0	0
Tmem87b	2	6	8	0	5	3	0
Anapc1	2	8	13	0	10	4	0
Mertk	2	0	1	0	0	1	0
Tsg101	7	23	21	0	25	24	0
Hps5	7	2	6	0	4	0	0
Map3k4	17	5	2	0	6	6	0
Piezo1	8	4	2	0	4	1	0
Blk	14	0	0	0	0	0	0
Rnf166	8	7	12	0	17	10	0
Ankrd28	14	3	8	0	5	9	0
Ankrd52	10	3	4	0	1	0	0
Pkd2l2	18	2	6	0	4	2	0
Srp19	18	29	21	0	23	29	0
Tmbim7	5	0	0	0	0	0	0
Clec4f	6	1	0	0	0	0	0
Klra17	6	0	0	0	0	0	0
Wdfy2	14	2	2	0	3	1	0
Rbsn	6	5	3	0	3	4	0
Mrps25	6	13	11	0	12	12	0
Dguok	6	8	11	1	7	8	0
Camta1	4	48	33	0	52	33	0
Csf1	3	4	6	0	4	5	0
Strip1	3	5	4	0	3	6	0
Kif1a	1	0	0	0	0	0	0
Alx3	3	0	0	0	0	0	0
Slc25a11	11	207	199	0	212	192	0
Chrne	11	0	0	0	0	0	0
Cmc2	8	33	24	0	34	15	0
Chfr	5	3	0	0	1	4	0
Ceacam16	7	0	0	0	0	0	0
Hoxa2	6	0	0	0	0	0	0
Adam28	14	0	0	0	0	0	0
Ankrd53	6	0	0	0	0	0	0
Tex261	6	19	24	0	18	16	0
Fam120b	17	2	8	0	10	6	0
Tbp	17	2	4	0	5	3	0
Psmb1	17	92	97	0	98	81	0
Pdcd2	17	7	4	0	6	5	0
Dll1	17	1	3	0	1	1	0
Nol3	8	9	14	0	12	7	0
Fhod1	8	0	2	0	2	1	0
Plekhg4	8	0	0	0	0	0	0
Slc9a5	8	0	0	0	0	0	0
Elmo3	8	0	0	0	0	0	0
Stc1	14	0	0	0	2	5	0
4931428F04Rik	8	1	0	0	0	0	0
Tppp3	8	12	7	0	10	10	0
Msh3	13	1	5	0	1	1	0
Adamts13	2	0	0	0	0	0	0
Tmem208	8	13	12	0	18	10	0
E2f4	8	8	9	0	2	7	0
Surf4	2	27	32	0	37	27	0
Surf2	2	8	8	0	4	3	0
Dnajb9	12	21	31	0	20	19	0
Naf1	8	2	2	0	2	3	0
Yes1	5	1	5	0	9	0	0
Ppp1cb	5	121	97	0	99	95	0
Gorasp2	2	19	14	0	16	14	0
Tsen15	1	8	7	0	7	4	0
Oc90	15	0	0	0	0	0	0
Efr3a	15	5	13	0	6	14	0
Trappc2l	8	33	38	0	25	21	0
Acsf3	8	7	4	0	5	3	0
Ddx19a	8	3	6	0	5	5	0
Galns	8	1	0	0	2	4	0
Gata2	6	4	1	0	4	5	0
C8g	2	0	0	0	0	1	0
Entpd2	2	6	4	0	4	4	0
Rabl6	2	16	15	0	9	13	0
Ptgds	2	65	82	0	132	149	0
Edf1	2	67	62	0	77	62	0
Clic3	2	0	0	0	0	0	0
Npdc1	2	5	6	0	8	5	0
Fbxw5	2	10	10	0	12	15	0
Slc25a13	6	53	57	0	42	28	0
Ube2i	17	23	11	0	14	15	0
Tsr3	17	1	2	0	2	2	0
Unkl	17	0	2	0	2	1	0
Lrrk1	7	1	2	0	2	2	0
Aldh1a3	7	0	0	0	0	0	0
Actn1	12	5	3	0	3	4	0
Sirt2	7	21	27	0	26	18	0
Hnrnpl	7	18	27	0	17	17	0
Nolc1	19	5	5	0	3	5	0
Casd1	6	7	13	0	5	4	0
Cnksr3	10	4	7	0	1	5	0
Mtmr1	X	2	4	0	8	4	0
Hmgb3	X	24	33	0	32	27	0
Map2	1	0	0	0	0	0	0
Cyp2j9	4	0	1	0	0	0	0
Nipsnap3a	4	0	0	0	0	0	0
Abca1	4	6	6	0	4	4	0
Nipsnap3b	4	3	2	0	5	1	0
Lage3	X	9	6	0	5	12	0
Ubl4a	X	22	23	0	27	23	0
Gdi1	X	13	9	0	10	12	0
Sash1	10	5	6	0	6	5	0
Gadd45b	10	2	2	0	2	7	0
Slamf6	1	0	0	0	0	0	0
Slamf1	1	0	0	0	0	1	0
Zdhhc12	2	1	1	0	0	0	0
Endog	2	34	44	0	37	30	0
Cybb	X	3	2	0	3	0	0
Golga7	8	16	13	0	10	12	0
Xk	X	2	1	0	3	4	0
Pcolce2	9	8	5	0	12	4	0
Cd48	1	2	2	0	1	0	0
Clpx	9	30	33	1	18	27	0
Trabd	15	8	9	0	5	9	0
Mov10l1	15	28	17	0	19	17	0
Dennd6b	15	1	3	0	2	4	0
Cd83	13	1	2	0	3	1	0
Cltrn	X	0	0	0	0	0	0
Ace2	X	1	0	0	0	0	0
Gzmb	14	0	0	0	0	0	0
Gzmf	14	0	0	0	0	0	0
Gzmn	14	0	0	0	0	0	0
C4a	17	0	0	0	0	0	0
Ager	17	0	0	0	0	0	0
Atf6b	17	5	3	0	6	2	0
Egfl8	17	0	0	0	0	0	0
Notch4	17	3	1	0	2	3	0
Ppt2	17	8	10	1	12	12	0
Prrt1	17	1	1	0	0	1	0
Rnf5	17	10	16	0	12	13	0
Fam163a	1	0	0	0	0	0	0
Cacfd1	2	9	7	0	5	7	0
Hivep2	10	6	5	0	7	4	0
2310057J18Rik	10	0	0	0	0	0	0
Arnt	3	3	3	0	4	3	0
Itga2	13	0	1	0	0	0	0
Mocs2	13	8	7	0	12	4	0
Nat9	11	0	1	0	8	4	0
Lpl	8	800	895	2	854	805	0
Atp6v0e	17	27	25	0	24	29	0
Nkx2-5	17	19	18	0	15	26	0
Zfp318	17	0	2	0	3	1	0
Ttbk1	17	0	0	0	0	0	0
Srf	17	22	17	0	19	11	0
Gata3	2	0	0	0	0	0	0
Gata5	2	0	0	0	0	0	0
Lama5	2	8	9	0	8	10	0
Steap1	5	0	0	0	0	0	0
Steap2	5	0	0	0	0	0	0
Hspa8	9	319	341	1	329	287	0
Serac1	17	2	0	0	1	0	0
Awat1	X	0	0	0	0	0	0
Pdzd11	X	18	16	0	7	11	0
Psma2	13	43	45	0	51	56	0
Mrpl32	13	25	29	0	24	19	0
Setdb1	3	2	4	0	4	2	0
Anxa9	3	0	0	0	0	0	0
Arnt2	7	0	0	0	0	0	0
Prune1	3	10	2	0	7	6	0
Cers2	3	10	7	0	8	3	0
Nlrp5	7	0	0	0	0	0	0
Capza2	6	67	69	0	64	43	0
Plekho1	3	12	9	0	12	13	0
Vps45	3	9	7	0	7	9	0
Prpf3	3	4	3	0	2	2	0
Anp32e	3	12	25	0	25	17	0
Aph1a	3	20	10	2	17	16	0
Tab2	10	10	13	0	12	6	0
Ppil4	10	5	5	0	4	6	0
Cnih1	14	29	24	0	26	28	1
Eps8	6	2	0	0	2	4	0
Med22	2	4	7	0	5	10	0
Abo	2	0	0	0	0	0	0
Surf1	2	13	8	0	11	16	0
Med28	5	20	23	0	24	19	0
Qdpr	5	31	25	0	23	18	0
Gnrh1	14	1	0	1	2	0	0
Tnr	1	0	0	0	0	0	0
Sqstm1	11	89	89	0	102	86	1
Nfe2l2	2	26	30	0	31	21	0
Rxrg	1	15	21	0	24	12	0
Rxra	2	7	7	0	6	7	0
Adamtsl4	3	6	5	0	8	5	0
Fcrls	3	3	3	0	3	2	0
Cd5l	3	0	0	0	0	0	0
Prpsap1	11	2	1	0	1	4	0
Fam184b	5	0	0	0	0	0	0
Ncapg	5	0	0	0	0	0	0
Lcorl	5	0	1	0	1	1	0
Lta4h	10	5	4	0	5	10	0
Amdhd1	10	0	0	0	0	0	0
Dstn	2	52	45	0	44	49	0
H2afy	13	13	11	0	13	13	0
Gtf2ird2	5	0	1	0	0	1	0
Bola1	3	22	23	0	24	15	0
Castor2	5	2	4	0	2	0	0
Fcgr1	3	1	1	0	1	1	0
Ncf1	5	1	1	0	1	1	0
Wnt11	7	6	1	0	0	1	0
Adss	1	4	2	0	2	1	0
1700016C15Rik	1	0	0	0	0	0	0
Il17rb	14	0	0	0	0	0	0
Cacna1d	14	1	0	0	1	0	0
Chdh	14	0	0	0	0	0	0
Actr8	14	6	9	0	6	9	0
Lrrc27	7	5	6	0	4	8	0
Stk32c	7	1	0	0	0	0	0
Fnta	8	17	22	0	20	21	0
Mtrex	13	5	6	0	4	6	0
Lbp	2	3	1	0	4	2	0
Celsr1	15	0	0	0	1	0	0
Fli1	9	7	4	0	6	2	0
Stard13	5	4	3	0	8	5	0
Tenm1	X	0	0	0	0	0	0
Camk1g	1	0	0	0	0	0	0
Diexf	1	2	1	0	0	0	0
Hsd11b1	1	7	12	0	9	9	0
Syt14	1	0	0	0	0	0	0
H2-M3	17	2	2	0	2	0	0
Lonrf3	X	0	0	0	0	0	0
Atp5e	2	705	693	3	696	615	4
Nelfcd	2	4	4	0	6	2	0
Tubb1	2	0	0	0	0	0	0
Ctsz	2	15	5	0	7	8	0
Prelid3b	2	27	33	0	19	26	0
Sertad4	1	1	2	0	0	0	0
H2-M2	17	0	0	0	0	0	0
Ube2a	X	29	23	0	21	25	0
Slc25a5	X	151	151	0	155	125	0
Atp1b4	X	0	0	0	0	0	0
Ppdpf	2	18	13	0	24	16	0
Kcnq2	2	0	0	0	0	0	0
Eef1a2	2	271	249	3	259	230	1
Col20a1	2	0	0	0	0	0	0
Pls3	X	10	11	0	13	9	0
Mpped2	2	6	7	0	3	3	0
Nkap	X	2	3	0	3	1	0
Ndufa1	X	312	303	1	314	286	1
Wt1	2	2	2	0	2	2	0
E2f3	13	2	1	0	3	0	1
Cr1l	1	11	19	0	20	14	0
Ppfibp1	6	14	8	0	10	13	0
Cd46	1	0	0	0	0	0	0
Cd34	1	21	20	0	29	21	0
Plgrkt	19	8	13	0	11	9	0
Cd274	19	3	0	0	1	0	0
Pdcd1lg2	19	0	0	0	0	0	0
Gtf3a	5	4	9	0	4	6	0
Mtif3	5	6	3	0	6	10	0
Lnx2	5	6	3	0	3	8	0
Il19	1	0	0	0	0	0	0
Dyrk3	1	0	0	0	1	0	0
Mapkapk2	1	103	108	1	113	92	0
Il10	1	0	0	0	0	0	0
Lamp2	X	52	52	0	53	30	0
Atxn10	15	16	26	0	18	26	0
Foxred2	15	0	1	0	0	0	0
Eif3d	15	12	16	1	14	16	0
H3f3b	11	50	57	0	48	46	0
Nup50	15	6	4	0	5	7	0
Phf21b	15	2	0	0	0	0	0
Nlrp14	7	0	0	0	0	0	0
Ift27	15	6	4	0	6	2	0
Pacsin2	15	49	36	0	50	31	0
Cmah	13	0	0	0	0	0	0
Ttll12	15	1	0	0	3	1	0
Bik	15	5	2	0	2	0	0
Scube1	15	0	0	0	0	0	0
Tox4	14	10	11	0	7	4	1
Mrps18c	5	21	24	0	34	20	0
Sulf1	1	4	3	0	4	4	0
Srsf6	2	21	30	0	14	22	0
Plcg1	2	5	6	0	6	12	0
Kctd2	11	11	5	0	4	3	0
Tmprss6	15	0	0	0	0	0	0
Kctd5	17	3	5	0	5	3	0
Pom121l2	13	0	0	0	0	0	0
Etaa1	11	0	0	0	0	0	0
Matn4	2	0	0	0	0	0	0
Svs4	2	0	0	0	0	0	0
Svs6	2	0	0	0	0	0	0
Slpi	2	2	0	0	0	0	0
Svs3a	2	0	0	0	0	0	0
Svs5	2	0	0	0	0	0	0
Rbpjl	2	0	0	0	0	0	0
Sdc4	2	1	8	0	5	8	0
Ccdc70	8	0	0	0	0	0	0
Il13ra1	X	11	13	0	10	5	0
Prl5a1	13	0	0	0	0	0	0
Nbr1	11	21	20	0	16	12	0
Cyth1	11	11	12	0	12	8	0
Rnd3	2	3	3	0	3	2	0
Brca1	11	0	0	0	0	0	0
Gast	11	0	0	0	0	0	0
Cntnap1	11	0	0	0	1	0	0
Nt5c3b	11	6	5	0	5	4	0
Coa3	11	32	38	0	48	31	1
Zpbp2	11	0	0	0	0	0	0
Gsdma	11	0	0	0	0	0	0
Med24	11	8	2	0	7	4	0
Gsdma2	11	0	0	0	0	0	0
Psmd3	11	22	13	0	22	29	0
Exosc10	4	5	1	0	5	4	0
Glod4	11	14	16	0	25	18	0
Vps53	11	4	2	0	1	12	0
Taok1	11	17	12	0	13	22	0
Dnttip1	2	6	10	0	7	11	0
Tnnc2	2	0	0	0	0	0	0
Acot8	2	4	3	0	3	4	0
Cd300lg	11	17	22	0	26	17	0
Spint4	2	0	0	0	0	0	0
Pyy	11	0	0	0	0	0	0
Mpp2	11	0	0	0	0	0	0
Ppy	11	0	0	0	0	0	0
Vtn	11	3	11	0	10	8	0
Nlk	11	2	4	0	5	0	0
Traf4	11	0	2	0	1	1	0
Aldoc	11	0	0	0	0	0	0
Stac2	11	0	0	0	0	0	0
Rpl19	11	93	127	0	112	84	0
Nek8	11	0	0	0	1	0	0
Cacnb4	2	0	0	0	1	0	0
Plxdc1	11	0	0	0	0	0	0
Arl5b	2	2	5	0	4	3	0
Zfp207	11	16	23	0	29	25	0
Psmd11	11	22	13	0	24	17	0
C1qtnf1	11	2	0	0	0	1	0
Pipox	11	0	0	0	0	0	0
Timp2	11	28	21	0	27	22	0
Zc3h18	8	3	4	0	4	1	0
Top2b	14	16	19	0	27	11	0
Rarb	14	5	2	0	6	3	0
Igfbp4	11	17	13	0	11	10	0
Cdc6	11	0	0	0	0	0	0
Suz12	11	5	7	1	5	4	0
Atad5	11	0	0	0	0	0	0
Crlf3	11	2	1	0	2	1	0
Krt27	11	0	0	0	0	0	0
Tns4	11	0	0	0	0	0	0
Tnfaip1	11	10	13	0	10	11	0
Abr	11	8	7	0	4	1	0
Rab11fip4	11	0	0	0	0	0	0
Cd40	2	1	0	0	1	0	0
Slc35c2	2	2	2	0	4	5	0
Zfp334	2	1	0	0	0	1	0
Elmo2	2	4	2	0	0	3	0
Wsb1	11	6	5	0	3	8	0
Ttpal	2	5	1	0	3	3	0
Rhot1	11	16	25	0	18	14	0
Hnf4g	3	0	0	0	0	0	0
Rhbdl3	11	6	2	0	5	5	0
Ada	2	0	0	0	1	0	0
Serinc3	2	148	144	1	130	103	0
Tha1	11	2	3	0	3	3	0
Pgs1	11	5	4	0	3	4	0
Birc5	11	0	1	0	0	0	0
Afmid	11	3	1	0	0	1	0
Trp53tg5	2	0	0	0	0	0	0
Pigt	2	8	6	0	4	6	0
Wfdc2	2	0	0	0	0	0	0
Etv4	11	0	0	0	0	0	0
Eppin	2	0	0	0	0	0	0
Dbndd2	2	5	8	0	10	11	0
Mmp9	2	0	1	0	0	0	0
Slc12a5	2	0	0	0	0	4	0
Ghdc	11	1	2	0	0	1	0
Pltp	2	7	14	0	10	3	0
Slc12a7	13	19	25	0	33	23	0
Ctsa	2	25	22	0	22	14	0
Zswim1	2	1	0	0	0	0	0
Slc12a4	8	5	9	0	8	8	0
Spata25	2	0	0	0	0	0	0
Myo1c	11	15	22	0	22	29	0
Crk	11	17	25	0	28	17	0
Cox7c	13	597	638	2	532	483	1
Pitpna	11	26	30	0	28	14	0
Mlx	11	5	9	0	5	8	0
Retreg3	11	4	5	0	9	7	0
Jph2	2	49	59	0	64	45	0
Dhx58	11	0	0	0	0	0	0
Rab5a	17	21	16	0	22	26	0
Hspb9	11	0	0	0	0	0	0
Nkiras2	11	13	7	0	8	16	0
Ppp2r5c	12	33	26	0	22	25	0
Ift52	2	9	3	0	4	2	0
Mybl2	2	0	0	0	0	0	0
Sgk2	2	0	0	0	0	0	0
Eya2	2	1	0	0	0	0	0
Prl3c1	13	0	0	0	0	0	0
B4galt5	2	1	4	0	3	2	0
Gdap1l1	2	0	0	0	0	0	0
Hnf4a	2	0	0	0	0	0	0
Ptgis	2	7	5	0	3	6	0
Cadps2	6	1	0	0	0	1	0
Ddx27	2	2	1	0	2	0	0
Cyth3	5	9	9	0	7	7	0
Cyth4	15	0	1	0	3	1	0
Rac3	11	0	0	0	0	0	0
Rrp7a	15	11	4	0	9	6	0
Cyb5r3	15	15	15	0	20	18	0
Ints2	11	0	0	0	2	2	0
Med13l	5	2	2	0	4	1	0
Hist1h2bc	13	56	55	1	54	56	1
Baiap2l2	15	0	0	0	0	0	0
Mafk	5	7	9	0	9	11	0
Med1	11	9	3	0	8	6	0
Erbb3	10	1	1	0	2	1	0
Stard3	11	8	9	0	5	6	0
Ikzf3	11	0	0	0	1	0	0
Mfng	15	3	3	0	4	5	0
Vmp1	11	17	22	0	17	19	0
Uchl5	1	9	6	0	3	7	0
Glrx2	1	8	11	0	10	13	0
Trove2	1	3	2	0	3	7	0
Stk4	2	1	7	0	1	5	0
Wfdc15b	2	0	0	0	0	0	0
Pmp22	11	21	19	0	24	18	0
Gdf9	11	0	0	0	0	0	0
Zcchc10	11	5	3	0	2	5	0
Prl8a2	13	0	0	0	0	0	0
Tbx5	5	5	5	0	3	5	0
Psmb6	11	69	86	1	70	63	0
Spag7	11	40	48	0	31	29	0
Pfn1	11	81	65	0	73	63	0
Tomm34	2	8	7	0	7	8	0
Ywhab	2	21	20	0	19	18	0
Ksr1	11	1	0	0	0	3	0
Gpx3	11	54	59	0	79	65	0
Anxa6	11	34	32	0	48	46	0
Il12rb2	6	0	0	0	0	0	0
Zkscan6	11	2	0	0	3	1	0
Kpna2	11	5	9	0	14	15	0
Smurf2	11	3	3	0	10	6	0
Cep95	11	2	3	0	1	3	0
Vezf1	11	9	5	0	9	8	0
Cuedc1	11	2	5	0	13	4	0
Srsf1	11	12	22	0	28	28	0
Abi3	11	2	2	0	1	1	0
Shroom1	11	0	0	0	0	0	0
Kif3a	11	2	0	0	0	2	0
Sept8	11	13	10	0	7	4	0
Mtmr4	11	1	1	0	2	2	0
Mrm1	11	5	8	0	11	4	0
Mapt	11	6	4	0	10	4	0
Kansl1	11	6	6	0	5	1	0
Gid4	11	11	6	0	12	11	0
Myo1b	1	3	4	0	6	6	0
Dhx40	11	5	3	0	4	1	0
Ypel2	11	4	0	0	3	1	0
Akap1	11	26	14	0	26	18	0
Nol11	11	11	3	0	14	5	0
Derl2	11	17	14	0	12	14	0
C1qbp	11	49	63	0	57	58	0
Rpain	11	0	5	0	3	3	0
6330403K07Rik	11	1	0	0	0	0	0
Slc13a3	2	0	0	0	0	0	0
Kcnab3	11	0	0	0	0	0	0
Chd3	11	2	0	0	0	1	0
Kdm6b	11	2	0	0	0	2	0
1700125H20Rik	11	0	0	0	0	0	0
Appbp2	11	11	9	0	6	4	0
Wnt9b	11	0	0	0	0	0	0
Adora2b	11	0	0	0	0	0	0
Ncor1	11	11	12	0	18	15	0
Trpv2	11	0	3	0	0	5	0
Cenpv	11	10	9	0	8	6	0
Pcgf2	11	0	0	0	2	1	0
Cwc25	11	1	1	0	3	2	0
1700001P01Rik	11	0	0	0	0	0	0
Pip4k2b	11	2	3	0	5	6	0
Trim37	11	2	3	0	5	1	0
Ybx2	11	1	2	0	5	2	0
Ctdnep1	11	26	21	0	21	25	0
Elp5	11	14	11	0	18	13	0
Slc2a4	11	86	110	0	114	89	1
Gabarap	11	126	128	1	106	101	0
Cldn7	11	0	0	0	0	3	0
2810408A11Rik	11	0	0	0	0	0	0
Phf23	11	4	3	0	5	7	0
Acadvl	11	251	255	1	229	207	0
Dnah11	12	0	0	0	0	0	0
G3bp1	11	35	25	0	27	26	0
Atox1	11	42	29	0	34	33	0
Glra2	X	0	0	0	0	0	0
Sparc	11	75	63	0	88	58	1
Glra4	X	0	0	0	0	0	0
Mief2	11	9	6	0	6	10	0
Tbx3	5	3	1	0	2	1	0
Mmp20	9	0	0	0	0	0	0
Mmp7	9	0	0	0	0	0	0
Crhr1	11	0	0	0	0	0	0
Dusp14	11	0	0	0	0	0	0
Tada2a	11	1	4	0	1	1	0
Ikzf1	11	0	1	0	0	0	0
Tcaf3	6	0	0	0	0	0	0
Pnpo	11	5	12	0	6	4	0
Cog1	11	6	1	0	7	0	0
Cbx1	11	10	5	0	7	9	0
Cdk5rap3	11	3	5	0	8	3	0
Copz2	11	8	9	1	10	4	0
Slc25a39	11	50	40	0	36	40	0
Sp2	11	3	1	0	2	3	0
Aatf	11	1	2	0	1	2	0
Lhx1	11	0	0	0	0	0	0
Dync1h1	12	23	9	0	12	15	0
Cpsf4l	11	0	0	0	0	0	0
Pex12	11	6	5	0	12	2	0
Ndel1	11	11	8	0	14	16	0
Slc25a35	11	3	0	0	2	0	0
Zbtb4	11	5	8	0	7	8	0
Tnfsfm13	11	3	2	0	3	5	0
Mpdu1	11	6	3	0	4	1	0
Fxr2	11	12	14	0	20	20	0
Atp5g3	2	1410	1430	2	1329	1137	2
Cd68	11	2	1	0	5	5	0
Slc35g3	11	0	0	0	0	0	0
Acsl1	8	166	174	1	157	172	0
Abca5	11	1	3	0	2	2	0
Smyd4	11	0	0	0	4	1	0
Lsp1	7	8	13	0	5	10	0
Zfyve27	19	2	5	0	2	0	0
[truncated: 53,415 more rows]

## Sheet: Supplementary_Table_3
logFC	logCPM	F	PValue	FDR	ID
-2.79755302857212	14.7382313716815	1047.49798545999	1.04106677207499e-57	3.84986492313329e-54	Gm10925
-1.11703718816533	15.14605594918	193.581842371836	3.85336167847657e-27	7.12486574350317e-24	mt-Cytb
-0.807991128740514	15.2505896413566	104.852029947098	3.13051694226054e-18	3.76355808302976e-15	mt-Co2
-0.86038842735738	14.8059076337266	111.522324927427	4.07091193405058e-18	3.76355808302976e-15	mt-Nd1
-1.51525577987399	15.7075842410383	248.99773257005	2.68654419071966e-14	1.98696808345626e-11	mt-Co3
1.0094030865359	13.4187687152374	123.696154132398	3.58564876740079e-14	2.20995485697469e-11	mt-Atp6
5.25796861704219	5.1204562910618	51.8463870493824	4.97660259849598e-11	2.62906805846259e-08	Bdnf
5.00847942345205	4.9117571307025	41.0122971430742	2.79890259285136e-09	1.29379272354554e-06	Pm20d2
-0.533247578183721	11.8645308066234	37.5658644333896	1.07086137359023e-08	4.40005039948517e-06	mt-Rnr1
-0.953296137899609	14.0687113579876	85.8050456634365	1.9992939668978e-08	7.39338908958806e-06	mt-Nd2
-4.8072656600169	4.64660672057644	31.9718087783899	1.01240701761606e-07	3.403528319222e-05	mt-Ts1
4.04676178100427	4.85651942922806	31.7586572151661	1.18511605345385e-07	3.65213263806028e-05	U2af1l4
-1.7105038629661	6.20290146856297	29.181834162882	3.23284373578277e-07	9.19619702686513e-05	mt-Tg
-1.51880665096056	6.15969701433598	23.5009840185376	3.64008502987313e-06	0.00096150246003363	mt-Ti
-1.58597881827272	5.79332997530104	19.8428780029105	1.84679768291158e-05	0.00455297188760469	Dysf
0.784965109697659	7.17624318138664	13.6684694350546	0.000325347176877759	0.075195866255872	Ivd
2.39636279156592	5.19854997624797	15.1127918170091	0.000860173899224555	0.187113122313671	Tnik
-1.64416886253903	4.95265979649368	10.649964479868	0.00142055772680995	0.291845692985732	Odr4
0.720933465374393	6.97194728448131	9.66945598082071	0.00234233431103649	0.455892225379629	Slmap
1.61226857304278	5.12098428697861	9.97340399728244	0.00268670259289758	0.496771309426762	Sybu
0.434104148377472	8.49863536209977	9.0155966555174	0.0033845786969991	0.596008191500128	Gm13340
-0.557323379572031	7.40998724122613	8.25609092719364	0.00477574533676302	0.792119005126401	Gstp1
1.535678239821	4.85535201380393	8.18125640979123	0.00496393546586474	0.792119005126401	Atp2c1
2.24376947815068	4.28824527002598	8.06857223297667	0.00526188879605598	0.792119005126401	Gtf2h2
1.10704002000916	5.50806313811817	8.03468931546282	0.00535505006169822	0.792119005126401	Tgoln1
1.30048014058019	5.1281202112396	7.86753320275473	0.00584025588417659	0.830664086910963	Dhx32
-1.2451690693648	5.08311184656976	7.23480721627766	0.00812957432651222	0.883656795571503	Ammecr1l
0.625031593440368	6.90753777695412	7.17069033282147	0.00840853183779402	0.883656795571503	Tmem14c
1.03318659214643	5.53021354427118	7.17057398614711	0.00840904696415618	0.883656795571503	Pcca
-0.887130697444269	5.83892745549415	7.04339002074198	0.00899222044151309	0.883656795571503	Sdf4
1.5902288949509	4.63638308221311	7.04168053300439	0.00900033878085966	0.883656795571503	Adgrl2
1.82161874486523	4.4513989677783	7.02875097046565	0.00906198810756885	0.883656795571503	Gm36372
-0.616548000391597	6.90768819256961	6.96935589939979	0.00935087440652536	0.883656795571503	Rilpl1
1.05432308642883	5.55010002708259	7.06387118631776	0.0093665334281041	0.883656795571503	Polr2g
-1.4033258439755	4.80323866716968	6.86534416975824	0.00988003712499585	0.883656795571503	Bcl2l2
-0.328425998433211	8.88315697334045	6.74229986241429	0.0105464468092371	0.883656795571503	Phyh
1.15428476292344	5.19830606982813	6.73014966540106	0.0106147402854475	0.883656795571503	Rbms2
1.31030963602748	4.94600724145515	6.72908676197148	0.0106207364556364	0.883656795571503	Tmem53
-1.20969178838792	5.06064473887591	6.72295260936103	0.0106554100155066	0.883656795571503	Phf20l1
-1.79626458251595	4.80857836441209	7.55108883268435	0.0108604159332854	0.883656795571503	Gm10819
-0.988970894618964	5.52241796026613	6.60670231570771	0.0113352592583362	0.883656795571503	Ppp5c
-0.377410005359913	8.35286802704934	6.59584168982908	0.0114010379376421	0.883656795571503	Ryr2
0.317982977675412	8.95644289324594	6.55976857475042	0.0116223846070763	0.883656795571503	Fxyd1
1.04194078751869	5.41575207584239	6.53552660858784	0.0117736438704364	0.883656795571503	Sh3bgrl
-0.854696208837206	5.81951077193345	6.52263499555014	0.0118549151592564	0.883656795571503	Rnase4
0.914977918956625	5.66834024107531	6.50373933368411	0.0119750941095951	0.883656795571503	Gm13341
0.824320692943599	5.97332249320055	6.47224932840677	0.0121782014012352	0.883656795571503	1110004F10Rik
1.80834327387197	4.45679139379831	6.53158521100803	0.0123765781025896	0.883656795571503	Mettl2
1.7552278210693	4.41294637995636	6.38072446756064	0.0127891495134589	0.883656795571503	Cers4
1.59191282643986	4.76240631762498	6.73421040547897	0.0128349023347954	0.883656795571503	B4gat1
-1.35899673579803	4.77542246163257	6.33409800239644	0.0131125871088984	0.883656795571503	Efr3a
-1.21807908253311	4.98095618841184	6.31945866059235	0.0132158864298681	0.883656795571503	Flot2
0.450095917744258	7.69850261745586	6.3273657233171	0.0132175374433265	0.883656795571503	Park7
-0.567170454564354	7.01224027449744	6.31776040885651	0.0132279245604073	0.883656795571503	Slc8a1
1.53103753239844	4.60254295172795	6.29971169062112	0.0133565722203841	0.883656795571503	Nol11
-1.21242482144236	4.97775759043003	6.24763266415078	0.0137351449714966	0.883656795571503	U2af1
1.26860910545182	4.91784602849509	6.23963698512635	0.0137942505996662	0.883656795571503	Dsc2
1.11551018650641	5.17470665590988	6.23086381323956	0.0138594089083686	0.883656795571503	Elof1
1.39221188911886	4.76342793039498	6.12258312657185	0.0148552732296035	0.905428552918247	Atp5k-ps2
-1.28768065784887	4.83610435327786	6.05852094038211	0.015206652986969	0.905428552918247	Prune2
-0.488299666284962	7.37070800459749	6.02027916102449	0.0155398443565172	0.905428552918247	Pigp
-0.946538461938122	5.49854349191489	6.00442527126109	0.0156571809150982	0.905428552918247	1700021F05Rik
-0.476946902602123	7.49254541511014	6.05191408841262	0.0157342004147043	0.905428552918247	Cox6a1
-0.943276409391232	5.49658773198336	5.96277487514916	0.0160135490162269	0.905428552918247	Uxt
1.07328459281185	5.2189467453275	5.95612901766835	0.0160711915071151	0.905428552918247	Mgat1
-1.07326513656602	5.20567583908165	5.94598166491171	0.0161596226318562	0.905428552918247	Timm22
-1.06407274010331	5.20248172287298	5.81012695399424	0.0173937937667433	0.957764336019836	Tmem41b
1.02710302931319	5.32673153649877	5.79178091391669	0.0176116751891154	0.957764336019836	Gm10073
-1.07379203507765	5.13521531257574	5.7205387764511	0.0182612855515878	0.96432626641932	Pde2a
0.94007062627846	5.47381792786009	5.70673412247941	0.018398932145012	0.96432626641932	Bud31
1.48099972327506	4.56417866966444	5.67614884271901	0.0187077824082187	0.96432626641932	Cyyr1
-1.07488876997118	5.1365811516507	5.64794634777061	0.0189973836456792	0.96432626641932	Gm8186
-0.815344890412223	5.75484317335559	5.62146094664007	0.0192736296467092	0.96432626641932	Anp32a
1.07314465909652	5.1515835496165	5.61924272815904	0.0192969561154758	0.96432626641932	Ciao1
-0.192428915394788	13.3493607964223	5.39406212232237	0.0218401408515744	0.998879330486655	mt-Nd3
1.53664900597161	4.45426551912629	5.33396631145991	0.022558146928025	0.998879330486655	Sema4d
0.793399104203833	5.77939521914166	5.28529149046334	0.0231700351434411	0.998879330486655	Srsf7
0.850981151744248	5.58451896318946	5.22979688650098	0.0238889891205706	0.998879330486655	Gpbp1
-0.912988580866268	5.42301155725023	5.22336198663664	0.0239738601769149	0.998879330486655	Zmat2
-0.472331233952389	7.22222260031914	5.1997401844478	0.0242881402598462	0.998879330486655	Psma6
0.74498764397904	6.00025498137712	5.22698419038453	0.0243573772091362	0.998879330486655	Parm1
0.812234359180257	5.79668272759714	5.24633620715545	0.024732183554936	0.998879330486655	Cobll1
0.702135390580668	6.07373793996784	5.12999164574804	0.0252416642996532	0.998879330486655	Cmc2
1.28162045100666	4.70187522812416	5.12602458960769	0.0252970677069621	0.998879330486655	Klhl23
1.27839402403564	4.70254249014384	5.12440276931187	0.0253197546851874	0.998879330486655	Ergic2
0.538870016734295	6.83357176041514	5.12263755861322	0.0253444718299055	0.998879330486655	Hnrnpa1
-0.328308184491868	8.40482653417874	5.10205820987531	0.0256345127180365	0.998879330486655	Cisd1
-0.785321710159774	5.73880254428932	5.09028784580831	0.0258019703787113	0.998879330486655	Sfr1
-0.889902018881075	5.46375404472097	5.07651318658297	0.0259994068419482	0.998879330486655	Atp1b3
-0.956837643210844	5.27171869254717	5.07592812972143	0.0260078277771703	0.998879330486655	Atg9a
-0.876594576359114	5.45759105396829	5.00649543476152	0.0270278863164434	0.998879330486655	Paqr9
0.991253785142567	5.17467601494281	4.99569035528135	0.0271903793419108	0.998879330486655	Pitpnc1
-1.01866636198983	5.10373544838066	4.98875372850655	0.0272952386698409	0.998879330486655	Tpr
-0.437532995173759	7.3654102195164	4.98324644639399	0.0273787944073089	0.998879330486655	Rpl5
-0.78334135943154	5.69388432804495	4.97582226393714	0.0274918599898307	0.998879330486655	1810022K09Rik
0.612194137853819	6.44499792495084	4.95611496047137	0.0277943834791469	0.998879330486655	Flot1
-1.02476505932778	5.1084731762211	4.94997922072927	0.027995643618731	0.998879330486655	Tmem248
-0.986064894367726	5.15659510466641	4.93159158863066	0.0281757464307821	0.998879330486655	Gm11716
-0.731791417371974	5.86770642523891	4.90940957992709	0.0285254529793397	0.998879330486655	Tecrl
-0.983041207360779	5.15424827669668	4.90153707505306	0.0286506637719971	0.998879330486655	Paip1
0.883090245405851	5.4311860240183	4.86690269771679	0.0292084439822496	0.998879330486655	Abcb8
-0.743755408499488	5.79544310885626	4.77229805628918	0.0307912483778883	0.998879330486655	Strip2
0.583593883094575	6.51656808267771	4.76486425184396	0.0309194020470585	0.998879330486655	Gabarapl2
0.994508626846485	5.10250925623592	4.75057016199849	0.0311674086320978	0.998879330486655	Cmas
-0.951010670251427	5.20288549045786	4.74205326493094	0.0313161779194551	0.998879330486655	Dhrs1
1.03472319499517	5.05502656007673	4.73163779939571	0.0315835096788563	0.998879330486655	Trappc3
0.798417331812382	5.60130976207949	4.71012716314606	0.0318805631481343	0.998879330486655	Sptan1
0.87030572475831	5.43689286576378	4.68580683191486	0.0323177066900783	0.998879330486655	Rab3ip
0.794258314122584	5.60310334245598	4.64418284531933	0.0330806487628055	0.998879330486655	Hist1h4h
-0.687668852417554	5.95080722987799	4.64301005714345	0.0331024193076781	0.998879330486655	Diablo
1.12510471333117	4.82968385598195	4.6247148484516	0.0334440046996623	0.998879330486655	Kank2
-0.856776554738901	5.44592287684176	4.61934782318924	0.0335449173498617	0.998879330486655	Dpm3
1.12293034743476	4.83086096780944	4.57595506411537	0.0343727388243543	0.998879330486655	Gga2
0.630084901364125	6.23352037860919	4.55745304352847	0.034732263322529	0.998879330486655	Rps19-ps6
0.957863132732936	5.14809159462158	4.53580171676815	0.0351580490638055	0.998879330486655	Tm9sf1
-0.64909287552505	6.09455932527752	4.51050492502529	0.0356625420986887	0.998879330486655	Vapb
-0.694086289312064	5.88255499106018	4.50693301250501	0.0357343925243794	0.998879330486655	Ywhaq
0.403158932538302	7.46927444941476	4.48144002084825	0.0362516716837351	0.998879330486655	Ppif
0.616008422222645	6.308392608169	4.47102528925566	0.0364705278366352	0.998879330486655	Mrpl11
0.668715438833844	6.0260077140741	4.44491110759086	0.0370067672270255	0.998879330486655	Rhobtb1
0.507951282049057	6.80892784535922	4.44099576296023	0.0370886864433161	0.998879330486655	Mlf2
-0.886113731894393	5.2923010331946	4.43968878833325	0.0371160745749661	0.998879330486655	Rtn4ip1
1.21090413588878	4.89302432650475	4.61193250463548	0.0374907689412352	0.998879330486655	Mark3
1.06275978061272	4.88793583247771	4.41551649678881	0.0376265018707075	0.998879330486655	Ptdss1
0.400711196431063	7.46361862384389	4.40445481868488	0.0378625626055009	0.998879330486655	Mlf1
0.628913872772406	6.19804010779478	4.38797559939472	0.0382171562419901	0.998879330486655	Ppip5k2
1.14562406521196	4.73495761869206	4.34077547381852	0.0392524476119238	0.998879330486655	Ap2a2
0.910973361875829	5.19788133552327	4.32500777384415	0.0396049038057372	0.998879330486655	Kdr
-0.69185661682915	5.84546190638389	4.30426635830213	0.0400736687028777	0.998879330486655	Ubr5
-0.859435992533156	5.33570711178189	4.3001963367235	0.0401663432535682	0.998879330486655	BC031181
-0.692882523897156	5.806353777021	4.28515266566077	0.0405108709998065	0.998879330486655	Atxn10
0.41558092709213	7.32752164688973	4.26992446693514	0.040862827494133	0.998879330486655	Ptgr2
0.812237060750325	5.45441109769226	4.24665680180684	0.041406889659657	0.998879330486655	Arpc5
0.579824616179071	6.37406552639895	4.23852887712898	0.0415987551017218	0.998879330486655	Atp6v0c-ps2
1.15125889720032	4.7332325102709	4.23944654290591	0.0416666348421128	0.998879330486655	Atxn2
0.513358525686793	6.68780825396352	4.21232607254848	0.0422237602796021	0.998879330486655	Camta1
0.367999027282332	7.66180213434266	4.19498492160781	0.0426428843298003	0.998879330486655	Apobec2
0.750965170045582	5.61556007560639	4.18315957151117	0.0429312345762495	0.998879330486655	Pam16
-0.790709533732088	5.51294814739332	4.18294660667645	0.0429742618546042	0.998879330486655	Ddost
0.337032376939495	7.9364173040814	4.18106324832197	0.0429825678390563	0.998879330486655	Rps2-ps10
-0.60697060338878	6.24608906117461	4.1645753227496	0.04343395926885	0.998879330486655	Tacc2
-0.877563668489291	5.22596727517222	4.15993377007854	0.0435036377437571	0.998879330486655	Mccc2
-0.738248522032672	5.62431131924651	4.1508291805922	0.043730235461217	0.998879330486655	Lamb2
0.90214888556447	5.20192055620695	4.14914661868883	0.0437722490914466	0.998879330486655	Timm21
0.796578053099573	5.48817118202531	4.14780937415674	0.0438056708161915	0.998879330486655	Rmnd5a
-0.935923965614426	5.05704686888841	4.13430404651617	0.044144737763005	0.998879330486655	Atp5s
-0.937626410653483	5.05818088435208	4.12010125472861	0.0445043356028244	0.998879330486655	Rnf181
0.23133819098019	9.30775734662602	4.09561682852978	0.0451316064325002	0.998879330486655	Gnas
1.16211862579673	4.63712400722583	4.01325535698586	0.0473118277942519	0.998879330486655	Slc35b1
0.997449305476041	5.24165640450315	4.20518607017209	0.0473411008923565	0.998879330486655	Gm14327
-0.845534442707867	5.26969534264882	3.98629015470977	0.0480498576444654	0.998879330486655	Trafd1
0.607230646061041	6.12839642154416	3.98104452563819	0.0481948531995923	0.998879330486655	St13
-1.01239673203112	4.86261230311041	3.96810415369212	0.0485545445080856	0.998879330486655	Eml1
-0.447277078610194	6.97678065686036	3.93499985083285	0.0494878421334852	0.998879330486655	Uqcc1
-0.449175382044458	6.96224904929578	3.92437924982945	0.0497913158083998	0.998879330486655	Cmya5
-0.821002855449618	5.31507410639519	3.9113667601856	0.0501658524412039	0.998879330486655	Mypn
-0.760251852129827	5.49491671722105	3.90870285977233	0.0502428982491711	0.998879330486655	Gata4
1.01221468224127	4.85876825479912	3.9024263099779	0.0504249309449715	0.998879330486655	Seh1l
-0.34434901164187	7.71582504298065	3.89581409960996	0.0506174623211541	0.998879330486655	Txn2
0.786108437477633	5.43277812911224	3.87785687444704	0.0511443147695124	0.998879330486655	Eif2b4
1.29014506825357	4.45201913975731	3.87682703974369	0.051174706902402	0.998879330486655	Rnf141
0.500400741137527	6.63666199603631	3.87165839274443	0.0513275346817598	0.998879330486655	Sgca
-0.310154122874324	8.08212170758425	3.87098525916132	0.0513474740023344	0.998879330486655	Map1lc3b
0.553577710143649	6.38299217342356	3.83106991450947	0.0525447966099342	0.998879330486655	Jund
-1.76591957947647	7.54783717759423	10.4401895813015	0.0529345194053487	0.998879330486655	mt-Atp8
-0.267812358652605	8.58825479306349	3.81066087359743	0.0531685279053914	0.998879330486655	Dld
-0.931175205613079	4.9790994939204	3.81029861073916	0.0531796706560554	0.998879330486655	Snap47
0.593191198978852	6.11317601406046	3.78576055483592	0.0539402920727302	0.998879330486655	Ube2n
-0.223890388654734	9.25340674477227	3.7791499597521	0.054147194424031	0.998879330486655	Gm13394
-0.77459524470222	5.39961123006747	3.75519927985576	0.0549039790620038	0.998879330486655	Lmbrd1
0.720024939070791	5.59782157455941	3.74397034819277	0.0552735566229372	0.998879330486655	Syncrip
0.640261602274866	5.85605102091772	3.7387651858554	0.0554298214196132	0.998879330486655	Mccc1
-0.610557886164384	5.97653691636883	3.73817596965039	0.0554487747287098	0.998879330486655	Lamtor1
-5.30562278102757	12.5774286973294	14.5524588475546	0.0554720669470919	0.998879330486655	mt-Td
0.666879969472075	5.7501843961296	3.73061739740544	0.0556925294954968	0.998879330486655	Bmi1
0.409761715655107	7.16523138070311	3.7280387445649	0.0557759509943743	0.998879330486655	Polr2m
0.481148425443936	6.68657340964607	3.7167224831305	0.0561436314392148	0.998879330486655	Pacsin2
-0.580032194808657	6.14628359428404	3.71201636288423	0.0562973054347499	0.998879330486655	Wsb2
-0.643739878344545	5.81851267661218	3.70428537951418	0.0565507354652384	0.998879330486655	Srsf6
0.28775352659888	8.27329567920926	3.70357033480884	0.0565742372692316	0.998879330486655	Bola3
0.773022408606935	5.43825701199351	3.69706482470846	0.0567994827526029	0.998879330486655	Bri3bp
-0.627990715131743	5.88164017770799	3.69319920748425	0.056916294175166	0.998879330486655	Kremen1
0.665301624699752	5.75126007906514	3.69006180255295	0.0570202084062866	0.998879330486655	Parl
0.965661633435206	4.91301758987112	3.68481629948119	0.0572036839316724	0.998879330486655	Ccnl2
0.543017823893437	6.35472071015602	3.67923042870166	0.0573805255671153	0.998879330486655	Psmd7
-0.581754668818993	6.17635085739443	3.6798658132224	0.0574003192169939	0.998879330486655	Sgk1
0.591959714429986	6.05249886279454	3.64211684046427	0.0586338364088483	0.998879330486655	Cab39
0.625280200153419	5.88501658334962	3.64042202490111	0.058691768360248	0.998879330486655	Uqcc3
1.18223257273186	4.53182735857308	3.62388761265598	0.0592601884104934	0.998879330486655	Tpgs1
0.607952858375491	5.96040116507424	3.61478982431809	0.0595754772180572	0.998879330486655	Dynll1
0.425989860839438	6.99799962983153	3.59116217221665	0.0604027748902935	0.998879330486655	Sumo2
-0.494391722784523	6.64984313569668	3.60520384616043	0.0605741201216285	0.998879330486655	Ly6e
-0.856775202235614	5.08333045379985	3.56953098853957	0.0611710267452624	0.998879330486655	Taco1
0.90828410552202	4.97238395185785	3.56510737336837	0.0613294287817525	0.998879330486655	Dusp7
-0.373554939493676	7.34295138376205	3.55330315931318	0.061754285631216	0.998879330486655	Ost4
-5.32550156251461	8.91133911034496	13.0021151863814	0.0618375961653548	0.998879330486655	mt-Tk
0.552948252834843	6.24293051749717	3.5507913359242	0.0618450999040596	0.998879330486655	Ddx3x
0.432648557267284	6.98476063016985	3.55313657873093	0.0619272979999053	0.998879330486655	Gm15543
0.905704907995299	4.97327845473468	3.53652833209755	0.0623635131145952	0.998879330486655	Maip1
1.00096899855281	4.86436848916754	3.55391455631619	0.0627600591487644	0.998879330486655	Asrgl1
-0.534506894558007	6.33936664722361	3.52299616003303	0.0628596983372852	0.998879330486655	Ncl
-0.965898498342834	4.83617013162854	3.48861154287318	0.0641397509478524	0.998879330486655	Prorsd1
0.394347078576834	7.20285438899747	3.48856155272714	0.0641416323144557	0.998879330486655	Sar1b
1.10099285212413	4.60233926425089	3.48501020309261	0.0642754390859683	0.998879330486655	Gypc
-0.787679469451902	5.29498115756848	3.48430938269064	0.064301880000194	0.998879330486655	Eif3b
0.417972478693213	7.00004413953093	3.46193027593008	0.0651524190349549	0.998879330486655	Lrrc10
0.962989459329249	4.82834413161706	3.44987191860174	0.0656157412344144	0.998879330486655	Sap30l
0.316064683425841	7.80385253791986	3.44098020397115	0.065959671385653	0.998879330486655	Gm10275
0.699688470692905	5.5507706795417	3.43949063556138	0.0660174780080779	0.998879330486655	Ehbp1
-0.6790369850865	5.58997974182757	3.42293511396132	0.0666636594143425	0.998879330486655	Mrpl1
0.86471699082868	5.02545108154184	3.41597748039714	0.0669372626228564	0.998879330486655	Lrrfip1
0.183012673928894	10.0261972115223	3.41293384287931	0.0670573328747062	0.998879330486655	Atp5k
-0.430970529500958	6.87160106497538	3.41158236395779	0.0671107228493761	0.998879330486655	Rpl17-ps5
0.86423836023929	5.02519981269473	3.40787187415821	0.0672575418137457	0.998879330486655	Mtfr1
0.51540638139513	6.3815112066225	3.39874275561047	0.0676202500485075	0.998879330486655	Cops4
0.862406664050553	5.02646276197215	3.39805902016758	0.0676475005632752	0.998879330486655	Mpnd
-0.56059874983218	6.13483200159905	3.3955056348913	0.0677493717464383	0.998879330486655	Tmem30a
-0.616830298375699	5.80338065590494	3.38859477820501	0.0680259247047536	0.998879330486655	2210408F21Rik
0.589142365103704	5.9441276002487	3.3860694483214	0.0681272859302553	0.998879330486655	Ube2g2
0.870048638793116	5.02380543631596	3.38471731577227	0.0681816247787221	0.998879330486655	Zfp445
-0.591302949277178	5.96696412013433	3.38204333707971	0.0683097431388134	0.998879330486655	Ensa
-0.373783891448018	7.27014139527686	3.37390224310089	0.0686179482626998	0.998879330486655	Pnpla2
-0.325641977956157	7.65991642559093	3.37182935967878	0.068701921500702	0.998879330486655	Rpl12
-0.526629614368235	6.30902635127639	3.36082679568057	0.0691495065619667	0.998879330486655	Cisd2
-0.393982992212519	7.12341328702771	3.35988624956233	0.0691879143326432	0.998879330486655	Rpl36al
0.462319222150393	6.65158981965527	3.3434769249024	0.0698617318833066	0.998879330486655	Lrpprc
-0.327088879982807	7.62306329038627	3.30819060680815	0.0713349174747235	0.998879330486655	Mrpl33
0.246992897080299	8.7513790577275	3.31078155783987	0.0723660895092516	0.998879330486655	Gm9794
0.761315361645597	5.31374193137941	3.2725254217126	0.0728582304886646	0.998879330486655	Elavl1
0.505278623410672	6.40370294927594	3.27143401073306	0.0729053996625726	0.998879330486655	Palld
-0.377111449254459	7.23319478179518	3.26901106912424	0.0730217812214414	0.998879330486655	Inpp5a
0.345911739202503	7.43433378363791	3.25134869609215	0.0737794055047033	0.998879330486655	Sparc
-0.536406090866782	6.18050597887278	3.24689130293656	0.0739749068317074	0.998879330486655	Ndufaf4
0.235340193108076	8.78566855179937	3.24252053828449	0.0741671553765135	0.998879330486655	Sod1
-0.629356009736104	5.69228790933432	3.23927653739755	0.0743101941421711	0.998879330486655	Ptcd2
0.770020141857272	5.30777258817654	3.24111021101393	0.0745498483277622	0.998879330486655	Gm6136
-0.539483898580625	6.20905562907032	3.22866102327274	0.0749222993692527	0.998879330486655	Snrpe
-0.872051066561532	4.94665287456035	3.22494459820932	0.0749457356752923	0.998879330486655	Ski
0.458003787597976	6.63935575308349	3.22363707950933	0.0750040103177673	0.998879330486655	Kcng2
-0.72436897188096	5.42481862769883	3.22473775579019	0.0751284968137962	0.998879330486655	Dynlt1b
-0.357808181269513	7.33322201500756	3.21937699744627	0.0751942194510438	0.998879330486655	Rab7
-0.460486994125951	6.65075658640297	3.21169319066997	0.0756807988041239	0.998879330486655	Nudt7
-0.61657377522101	5.72548224205488	3.20302233989083	0.0759293294084561	0.998879330486655	Clptm1
-0.429607645471136	6.80338828269141	3.19141525385131	0.0764557877263624	0.998879330486655	Gstk1
0.609732808021921	5.77047683378761	3.18754727539978	0.0766321076262621	0.998879330486655	Akap1
-0.569349708443227	5.95372410361289	3.18595883619351	0.0767046440074871	0.998879330486655	Wbp2
-0.693678276635227	5.45787767562217	3.17850927962146	0.0770458281482936	0.998879330486655	Itfg1
0.628729943335294	5.68461060561216	3.17150580702165	0.0773680893001697	0.998879330486655	Gm6581
-0.587004954158678	5.85977882865092	3.1679794829426	0.0775309066362312	0.998879330486655	Plpp3
-0.836568379242931	5.0019811502484	3.16689619332832	0.077580999152792	0.998879330486655	Phf5a
1.11881525821527	4.49365324584548	3.15568021177748	0.0781017157352029	0.998879330486655	Hmgn2-ps1
0.505813428964978	6.33374144770191	3.15155669834794	0.0782941114661161	0.998879330486655	Dele1
-0.527816255444687	6.2021423128068	3.14068821007288	0.0788036947356024	0.998879330486655	Clpp
0.862009329683243	4.94398597260942	3.1347002582541	0.0790859913109211	0.998879330486655	Bloc1s6
1.01906667190185	4.67508318468037	3.13404372096196	0.0792845548017076	0.998879330486655	Paip2b
0.418428731983614	6.84499418607037	3.12648975264925	0.0794748619878627	0.998879330486655	Mrps16
1.11630483326893	4.49475448778598	3.11965839798309	0.0798000018566286	0.998879330486655	Med7
0.866916063812742	4.94206236764736	3.11807374513946	0.0798756308844016	0.998879330486655	Postn
0.686746834156584	5.49608183237542	3.11373240762761	0.0800832260410628	0.998879330486655	Usp14
0.960891001499758	4.73824319120211	3.11125575581273	0.0802019187992848	0.998879330486655	Usp24
-0.556897497489113	5.98002173534708	3.11029471856225	0.0802480278806874	0.998879330486655	Epn1
0.857824709802801	4.94629390779981	3.09951997563237	0.0807669681180214	0.998879330486655	Cdc26
-0.75750839414724	5.27819608212166	3.10162519407145	0.0809232814430758	0.998879330486655	Rpl7l1
-0.741193764217481	5.27093140391731	3.09595499169552	0.0809394726221637	0.998879330486655	Snhg6
0.660724357199247	5.56211922237561	3.08470892707692	0.081486294534864	0.998879330486655	Cacnb2
-0.497637885659198	6.3178917112992	3.05093231183693	0.0831530301306568	0.998879330486655	Ak3
-0.524826652064991	6.33145884622667	3.08958414218534	0.0832163710666833	0.998879330486655	Mylk4
0.347716740848204	7.32628926128199	3.038204181411	0.0837907451573065	0.998879330486655	Alas1
-0.719317964526631	5.31510388065058	3.028940910616	0.0842582229216192	0.998879330486655	Aip
0.364422705890516	7.19483575115519	3.02641753418902	0.0843860608054695	0.998879330486655	Cebpb
-0.948054358559221	4.73850988271312	3.02524342688588	0.0844668756766405	0.998879330486655	Npm3
-0.778541138677466	5.10691671636548	3.02104172650201	0.0846591150606992	0.998879330486655	AC090881.3
0.852410114668411	4.94796480943526	3.01686573081702	0.0848718942133723	0.998879330486655	Psmg4
-0.90427854901274	4.80307527111762	3.0164367605139	0.0848937846217235	0.998879330486655	Pde6d
-0.736007092437002	5.26779266970435	3.01514967279916	0.0849595019566492	0.998879330486655	Mapre3
0.486731615353013	6.46052896805506	3.01795127608278	0.0856276831852231	0.998879330486655	Pgls
1.03823687171131	4.56724048067947	2.99834782430249	0.0858225135433222	0.998879330486655	Prmt7
1.03771299265975	4.56696802083854	2.99608005484756	0.0859397286775685	0.998879330486655	Cept1
-0.486453582983172	6.36096816906237	2.9953779404162	0.085976054684877	0.998879330486655	Pim3
0.90679967981581	4.79925880995145	2.9922814425002	0.0861364620636729	0.998879330486655	Tapbp
0.820477509132151	4.99832134018997	2.99033310226724	0.0862375595874759	0.998879330486655	Flad1
0.534324662440077	6.05218323238008	2.98076612761199	0.0867358703717581	0.998879330486655	Rbm3
0.727604026447785	5.29035881082541	2.97869325883496	0.0868442542181309	0.998879330486655	Pcyt1a
0.310373235078306	7.62063980190236	2.97704861167702	0.0869303532645823	0.998879330486655	Hibadh
0.489125939074103	6.3400099591688	2.96967423715874	0.0873175613496663	0.998879330486655	Pttg1ip
0.89792537340874	4.89360529909341	2.9865012169906	0.0874939715016069	0.998879330486655	Eapp
0.825086381382143	4.99628982700284	2.96619546166882	0.0875008780771254	0.998879330486655	Neurl2
-0.411679246718059	6.84552469823363	2.95880089716256	0.0879489744288188	0.998879330486655	Fitm2
0.724733856265781	5.29096386491893	2.95513192365873	0.0880866896963045	0.998879330486655	Pcna
-0.612350510324236	5.64139211785529	2.93703317009529	0.089054308643493	0.998879330486655	Isoc1
0.265181811482805	8.17783127118765	2.9299386480304	0.0894367814326516	0.998879330486655	Coq8a
-0.464977642116526	6.46747703366897	2.92968152353554	0.0894506770798017	0.998879330486655	Psma5
0.428966409186101	6.67856525423333	2.92568910882723	0.0896667414072482	0.998879330486655	Ktn1
-0.474861237210768	6.40333519073964	2.92452497490582	0.0897298506494195	0.998879330486655	Psmc5
-0.343703699752925	7.30169534850376	2.91120440771731	0.0904554579233504	0.998879330486655	Psmc3
0.507162764076934	6.22235802283545	2.90608424884041	0.09073607906982	0.998879330486655	Gatad1
0.746439107081272	5.1774444637812	2.88118850263725	0.0921142441978684	0.998879330486655	Nmt1
-0.730304573066827	5.26489556475735	2.88396406248192	0.0921380119009167	0.998879330486655	Bub3
-0.40825908719019	6.77322027516203	2.86345047557665	0.0931102109314928	0.998879330486655	Rac1
0.463900472521141	6.43501759714374	2.86315269025984	0.0931270319492774	0.998879330486655	S100a10
0.486581717469141	6.28695648200735	2.84065244094361	0.0944077290612613	0.998879330486655	Fahd1
0.965821339868056	4.63816859212565	2.8343225044385	0.0947715095729833	0.998879330486655	Pde7a
0.640082223654358	5.51102006739487	2.82332518862237	0.0954072001771897	0.998879330486655	Arpc1b
0.698800905688035	5.33212077233027	2.82193337107208	0.0954879873113059	0.998879330486655	Gbe1
-0.771447348052867	5.10255247612766	2.82608614865972	0.0956150227819967	0.998879330486655	Naa15
0.56074552943378	5.81322096434998	2.78981301628099	0.0973735003784184	0.998879330486655	Nsa2
-0.447843945753702	6.47940681578066	2.78954487690675	0.0973894123501128	0.998879330486655	Polr1d
0.849825821137847	4.8621203390882	2.773628544397	0.0983390812222548	0.998879330486655	Hsd17b11
0.676081539092311	5.37276426685439	2.76107436987927	0.0990953544442196	0.998879330486655	Pex7
0.503866817600259	6.12553828199493	2.76098360896863	0.0991008452805069	0.998879330486655	Ube2d2a
0.50318221168968	6.12688595778285	2.75389649073425	0.099530639748032	0.998879330486655	Isca2
-0.640626300069464	5.47667128335208	2.75230070687805	0.0996276989386457	0.998879330486655	Wls
0.515775487329666	6.03822082803935	2.74968301588535	0.0997871393591772	0.998879330486655	Tob1
-0.767272590825208	5.03441492775064	2.73624671209127	0.100609978989654	0.998879330486655	Tollip
-0.495644213437075	6.18467105412055	2.73531181487992	0.100667510552384	0.998879330486655	Rnf13
-0.763778450666204	5.0321347291304	2.7345706825996	0.100713144081179	0.998879330486655	Fbxo31
-0.550228018327824	5.83874616211615	2.72410044801952	0.101360274814508	0.998879330486655	Myo1c
0.204570624416445	8.98902978022444	2.72253686943057	0.101457308470282	0.998879330486655	Rps13-ps2
-0.545014330084756	5.83630587685328	2.71528773925621	0.10190852457567	0.998879330486655	Pdia6
-0.237101225766284	8.41033062105823	2.71326474542561	0.102034840036412	0.998879330486655	Echs1
-0.62286655781403	5.51438635771863	2.70738298649516	0.102403081431941	0.998879330486655	Slc39a1
0.813796834776585	4.91491746731162	2.70685551837613	0.102436176609386	0.998879330486655	Pgam5
0.904134833308566	4.7044766055011	2.68661212379805	0.10371530896842	0.998879330486655	Fam213a
0.410416007655278	6.68764811250015	2.68245923882686	0.103979900749527	0.998879330486655	Gnb2
-0.604172149705833	5.59428179324774	2.6758257206789	0.104404093235034	0.998879330486655	Pgam1
0.748022396959538	5.10094746392183	2.67596803733833	0.10440703454629	0.998879330486655	Smap2
-0.623605664055814	5.5140475970054	2.67342385173139	0.104558157724343	0.998879330486655	Rdm1
-0.505339921102238	6.04630336309912	2.67200234819747	0.104649456735279	0.998879330486655	Ppp1cc
0.193286095211994	9.13807006053366	2.66947515720764	0.104811989079876	0.998879330486655	Rps21
-0.489871045856992	6.15440326707957	2.66905160447384	0.104839256580192	0.998879330486655	Dcaf8
-0.680343075895962	5.29344246764743	2.66586409004272	0.105044715006425	0.998879330486655	Gm15710
0.511940627263764	6.03794782296128	2.65717042021523	0.105607357905422	0.998879330486655	Eng
-0.459555335416611	6.34749132403906	2.65427750421951	0.105795324061003	0.998879330486655	Coq2
0.805437197122199	4.91955607526806	2.65285003895332	0.105888209793526	0.998879330486655	0610037L13Rik
0.401355159969345	6.74493575302031	2.64245310367397	0.106567478123193	0.998879330486655	Banf1
-0.738799153195171	5.08499658331367	2.64004961212374	0.106725193854972	0.998879330486655	Rab3gap1
-0.415488696171544	6.64641798108277	2.63938366839204	0.106781015728202	0.998879330486655	Mkks
0.613137186452365	5.54995958384346	2.63524406041437	0.107041308793092	0.998879330486655	Rras
0.648224728919918	5.41482713319718	2.63095615232172	0.1073242501643	0.998879330486655	Idh1
-0.475060709739534	6.22852582152387	2.62883356526204	0.10746461811086	0.998879330486655	Pnkd
-0.445814493502995	6.40997736414867	2.62140658953947	0.107957375473271	0.998879330486655	C1qa
0.646322084248893	5.41587904801681	2.6188664256852	0.108126483169992	0.998879330486655	Ak2
-0.523968160613187	5.89561881907761	2.61690059984149	0.108257557144314	0.998879330486655	Anapc16
-0.57274950591045	5.66068473063633	2.61679729710347	0.108264449867745	0.998879330486655	Slc25a34
0.688699208927021	5.26868154128308	2.61233283028267	0.108562801255912	0.998879330486655	Hsph1
-0.236709566991931	8.3789775905662	2.60286180557079	0.109208999589084	0.998879330486655	Pygm
-0.525159371734142	5.89665762182719	2.60082657592727	0.109335962066858	0.998879330486655	Arl2
0.685137678956704	5.26893058049251	2.5979666706594	0.109529081356322	0.998879330486655	Ypel3
0.771384333842202	4.97120395061594	2.59585982577352	0.109671591761439	0.998879330486655	Kcnh2
-0.495977234143395	6.07191235167698	2.59437905409906	0.109771876944259	0.998879330486655	Copb2
-0.888344848020554	4.70838091840008	2.59161827670583	0.109959122879464	0.998879330486655	Trpm7
0.769320369376075	4.97235200873271	2.59121814943278	0.109986290423526	0.998879330486655	Fbxw7
0.506712599327886	5.99745416334576	2.58850651530844	0.110170599802231	0.998879330486655	Dnlz
-0.466542709930146	6.27586414234274	2.58730083303673	0.110252660169272	0.998879330486655	Rtn3
0.772116401772043	4.9715847195496	2.58618823618481	0.110328445343486	0.998879330486655	Ubtf
-0.243671400161805	8.24596090749537	2.58320685105385	0.110531809987093	0.998879330486655	Rpl18
0.767010042597948	4.97337350477097	2.57596935730691	0.111027227547585	0.998879330486655	Kbtbd3
-0.235790474842501	8.32769688771336	2.57160624901584	0.111327082747595	0.998879330486655	Ube2d3
0.670474535338805	5.30773240838129	2.56534430700983	0.111759012250684	0.998879330486655	Ube3b
0.764880013831655	5.0567296531542	2.5789013849705	0.111787627450721	0.998879330486655	Cdip1
0.484976053213791	6.19284300825449	2.56418340148591	0.112020307354309	0.998879330486655	Pfdn1
0.856189680987393	4.76662684857571	2.55790906718208	0.112274297383205	0.998879330486655	Vps52
-0.394729059622342	6.7116223004922	2.55386799334997	0.112555465940647	0.998879330486655	Gdi2
0.51897981761738	5.90120904126316	2.55304483290487	0.112612835657814	0.998879330486655	Antxr2
-0.654936351026029	5.33433037524509	2.55023215181671	0.112809109929128	0.998879330486655	Kat2b
-0.641089952014978	5.37838462393173	2.54098320856635	0.113457211765021	0.998879330486655	Smarcd3
-0.174549851704026	9.63999530893384	2.54438678173375	0.114181962579689	0.998879330486655	Tmsb4x
-0.80757978509262	4.83475876280123	2.50927609867294	0.115710745811781	0.998879330486655	Tmem135
-0.494130876721019	6.03932089800706	2.49137612885559	0.117004996251179	0.998879330486655	Usp28
0.535355086543379	5.79539407838081	2.48919477553253	0.117163820657555	0.998879330486655	Tomm40
-0.545634459779364	5.76262941896457	2.48485537440281	0.117661709201498	0.998879330486655	Tnfrsf12a
-0.693471907244322	5.18629097096678	2.47425770742763	0.118303167523859	0.998879330486655	Hdac2
-0.197572972553398	8.92402940835738	2.46833391081999	0.118694934522523	0.998879330486655	Hopx
0.468543055754746	6.29468448921308	2.47767363230602	0.119063612376876	0.998879330486655	Ap4s1
-0.503053923564132	5.9517860732208	2.45394528838924	0.119764049669991	0.998879330486655	Osgepl1
-0.647691068489596	12.8865372030934	5.73951464042803	0.119803906258539	0.998879330486655	mt-Rnr2
0.807841828729958	4.827395832228	2.43853181449516	0.120921290042434	0.998879330486655	Fam49b
-4.31686157373969	7.8877352282222	6.19511117964455	0.121726219556537	0.998879330486655	mt-Tw
-0.810278208480575	4.98630608304045	2.48064436442937	0.121751225714575	0.998879330486655	Ap5s1
0.337185271964606	7.10002086098242	2.42511269956044	0.121939001919494	0.998879330486655	BC004004
0.907177757261296	4.60135703103565	2.41815969410727	0.122470095044302	0.998879330486655	Cerk
-1.46995157837447	14.0953654860134	6.14262028120929	0.122620159339212	0.998879330486655	mt-Nd5
0.177868566201751	9.32384025300665	2.41251896893206	0.122902858260117	0.998879330486655	Hadha
0.909357646480714	4.60013859384685	2.40673978007759	0.123348024661232	0.998879330486655	Cdc5l
0.51105076961969	5.90248151430871	2.40726464360908	0.12341984133616	0.998879330486655	Fbxo32
0.438207076677996	6.34181948534838	2.4036652652096	0.123585589285813	0.998879330486655	Polr2f
-0.513361818982506	5.82005850541673	2.40299744331902	0.123637259059352	0.998879330486655	Egln3
0.90228499587096	4.60352465176809	2.39722407159369	0.124084960603047	0.998879330486655	Zeb1
-0.153895001021027	10.0428806163851	2.39573898544996	0.124200417104476	0.998879330486655	Myoz2
0.320298801410029	7.24332214316205	2.39323527889155	0.12439533841792	0.998879330486655	Hsd17b10
0.634449080474733	5.3539997542695	2.38738667844082	0.124852010127193	0.998879330486655	Ppp1ccb
-0.182071240987138	9.22024214909333	2.38297426064484	0.125346055044513	0.998879330486655	Rpl18a
-0.302941713870506	7.37258879932629	2.37383056378555	0.125917761881339	0.998879330486655	Akr1b3
-0.738228503467699	4.94912294590212	2.36988990890902	0.126229482837919	0.998879330486655	Wfs1
0.483661182621775	6.02945693148176	2.36722603420653	0.126440697073688	0.998879330486655	Mrps33
0.418791412240845	6.50416920966795	2.36894705461789	0.12648538422175	0.998879330486655	Cast
-0.660083292985701	5.22760835885833	2.36523509673244	0.126598814745443	0.998879330486655	Xpnpep1
-0.323625568420249	7.16623177457423	2.35756183993939	0.127210298631555	0.998879330486655	Rab1a
0.670229880160179	5.20271829609595	2.34399567408882	0.128299539541345	0.998879330486655	0610009B22Rik
0.618056912452297	5.3939156093641	2.34243137864741	0.128425812089702	0.998879330486655	Fars2
-0.412897582912931	6.46036186221296	2.33997655695915	0.128624251634777	0.998879330486655	Sesn1
0.468235277127073	6.07759261003618	2.33099192916277	0.129353489586944	0.998879330486655	Trim35
0.426440035392662	6.38253415580258	2.32568812312883	0.129786159391311	0.998879330486655	Ndufb4c
0.194812489929584	8.8631029637813	2.32251154391177	0.130046076815341	0.998879330486655	Acat1
0.527646111680407	5.72100283568435	2.31762541107679	0.130447021442671	0.998879330486655	D5Ertd579e
0.198792614319057	8.74284950841122	2.30424187311381	0.131552401141181	0.998879330486655	Rps17
-0.344492756250695	6.98141586661054	2.30134951218134	0.131792674796311	0.998879330486655	Pcbp1
0.340578386919566	7.00945126588301	2.30077907671305	0.131840120352592	0.998879330486655	Ppp1r14c
-0.709660586593878	5.00430142928999	2.30012978893557	0.131894147853968	0.998879330486655	Mreg
0.57188452564673	5.56312003234568	2.29375833087085	0.132537784383757	0.998879330486655	Cyfip2
-0.360216512808311	6.88380051513484	2.29247063704351	0.132868078537953	0.998879330486655	Cystm1
0.851026382312264	4.66847647440783	2.28010698988639	0.133572589520137	0.998879330486655	Ralgapa2
0.555223006201144	5.60055069200951	2.27939843342738	0.133632425818405	0.998879330486655	Coq3
0.602044685330951	5.43016824829489	2.27867161873136	0.13369383546544	0.998879330486655	Slc43a3
-0.583547416316499	5.49267943968212	2.278060963022	0.133757547119323	0.998879330486655	Gmnn
-0.546969136237988	5.60623594653156	2.27726809515827	0.133812511523248	0.998879330486655	Hbp1
0.753086464009151	4.89098081288676	2.27386658672776	0.134100623062353	0.998879330486655	Arfgap2
-0.636376623363341	5.26951629633188	2.26412746129166	0.134929424120998	0.998879330486655	Msra
-0.48712992301664	5.91005952521362	2.26212772030074	0.135100318329462	0.998879330486655	Ube2e3
-0.480840987012588	5.93810690708857	2.26174295559289	0.135133227696548	0.998879330486655	4833439L19Rik
-0.619473842703414	5.315015186087	2.25930762343574	0.135341734928106	0.998879330486655	Emc9
-0.532885130660322	5.68051990017335	2.2531527645504	0.135870323513189	0.998879330486655	Mipep
-0.63289985541507	5.26926720253034	2.24515085661216	0.136561036667783	0.998879330486655	Scoc
0.670350377552598	5.12449547038965	2.23859109134919	0.13713023264458	0.998879330486655	Sbk1
0.280672442470808	7.53090592758106	2.23802842393689	0.137191257445318	0.998879330486655	Fundc2
-0.494161676326593	5.84564293306492	2.23761942116953	0.137214773513473	0.998879330486655	Riok3
0.468009569606787	6.05575290727803	2.2302225588308	0.137872355518814	0.998879330486655	Dusp1
-0.41027622650722	6.43810133678161	2.22455656829842	0.138357069469463	0.998879330486655	Rab10
-0.159516267784836	9.65543764302878	2.22404770590127	0.138412007534276	0.998879330486655	Gm5559
-0.680112727495489	5.05521843222295	2.22071268239957	0.138695252283429	0.998879330486655	Rpl36a-ps3
0.838677601019539	4.67370688105883	2.22058518476849	0.138706485499619	0.998879330486655	Dnm2
0.664837758344657	5.12808851615268	2.21996287896645	0.138761328744809	0.998879330486655	Tinagl1
0.544502657447301	5.60470414623106	2.21944657011874	0.138806849240503	0.998879330486655	Tbcb
-0.479616325317306	5.90559942173423	2.21571487030966	0.139136359505073	0.998879330486655	Rfk
0.541532499408278	5.6323492498924	2.21404769807624	0.139295923928452	0.998879330486655	Osgep
0.663415463838666	5.12734969998325	2.21298419769084	0.13937804097957	0.998879330486655	Cpq
-0.478500866509403	5.97018929195743	2.20905566869197	0.139874216143705	0.998879330486655	Fabp5
-0.661351491817886	5.10807086789277	2.19964189826149	0.140565789028675	0.998879330486655	Plec
0.310807471812036	7.18708225508255	2.18703413750031	0.141698718909374	0.998879330486655	Paip2
-0.327502480892901	7.08661400992794	2.18914206510242	0.141761903053121	0.998879330486655	Vegfa
-0.404649029267017	6.43336902965341	2.17886219608593	0.142438588777411	0.998879330486655	Kmt5a
-0.523929706539924	5.71514406620794	2.18343338478876	0.142502877255014	0.998879330486655	Ube2d1
-0.441653018128154	6.15587970172684	2.17072111348592	0.14318003532048	0.998879330486655	Dctn3
-0.2457634738892	7.88815207924831	2.16829727757399	0.143401632771164	0.998879330486655	Vegfb
0.268323904479782	7.63083505360295	2.15981625247355	0.14436012508303	0.998879330486655	Ndrg4
-0.674612213615258	5.05194589956043	2.15558680283667	0.144570087602656	0.998879330486655	Mta1
0.657647483152229	5.13082267706038	2.15516048552399	0.144609465750212	0.998879330486655	Bfar
0.444296585632626	6.12900925230769	2.15408251606649	0.144709090308284	0.998879330486655	Pmpca
0.334242670026306	6.9526746027913	2.15394059410641	0.144722212375629	0.998879330486655	Rbm38
-0.657890433900267	5.10582528160024	2.15240910791608	0.144863899430996	0.998879330486655	Arglu1
-1.93311768799105	14.936707046119	5.00712208399703	0.145639872867059	0.998879330486655	Gm28661
0.234691200505457	8.0279953947296	2.14233649523784	0.145799724718708	0.998879330486655	Atp1a2
-0.597651147914447	5.35658161113377	2.14139795636304	0.145887272656792	0.998879330486655	Ubald2
0.525975909011352	5.63968094513112	2.13673438674398	0.146323185133201	0.998879330486655	Psmd11
-0.308437550681882	7.15857856407186	2.13269198366641	0.146702237748957	0.998879330486655	Dnajc19
-0.162635105697019	9.42823353727	2.12125676534338	0.147780587894443	0.998879330486655	Ndufa12
0.685970427476641	4.99778456554561	2.11431019158621	0.148440070723408	0.998879330486655	Ggnbp1
-0.483916671497994	5.80397352007827	2.11138562707292	0.148718722976509	0.998879330486655	Tbx20
0.633785409975759	5.17630772931958	2.11024098478476	0.148827947006278	0.998879330486655	Gm15920
0.352959290072392	6.77956247543437	2.11014669262898	0.148836948633679	0.998879330486655	Itgb1
-0.462522651933469	5.9603871487209	2.10965429413511	0.14888396569878	0.998879330486655	Htra1
0.552036510767445	5.51224638836833	2.10958835706253	0.14889026304082	0.998879330486655	Plac9a
0.446561557730375	6.06398159050443	2.10828837950907	0.149014479975713	0.998879330486655	Tnfaip8
-0.186946754613523	8.79865398514116	2.10803838593056	0.149038381214747	0.998879330486655	Ndufa10
-0.753511981109634	4.80521545335319	2.10739438236744	0.149099972901789	0.998879330486655	Leprotl1
0.685726457782735	4.99765832516866	2.10588316179172	0.149244618331644	0.998879330486655	Babam2
0.276745540377085	7.44690371553487	2.10463567482313	0.149364141474687	0.998879330486655	Ly6a
-0.130597847727336	10.9199870389067	2.10236602499238	0.149581879807872	0.998879330486655	Fth1
-0.75138906870165	4.80416167630586	2.10050912306156	0.149760291052247	0.998879330486655	Zfp664
-0.481185428814298	5.8370760261395	2.09756915388506	0.150043261033742	0.998879330486655	Tead1
-0.26404981471068	7.57031105943477	2.09429705250269	0.150358917401057	0.998879330486655	Igfbp7
0.23899041886628	7.94740817442536	2.0941596502051	0.150372189064104	0.998879330486655	Rpl11
-0.55438484731288	5.47796682490149	2.08729970719747	0.151036495830943	0.998879330486655	Mcrip1
-0.151730417916247	9.68366713047072	2.08727851723854	0.151038553028755	0.998879330486655	Acadl
-0.452265108855128	6.0167340314527	2.08626532600428	0.151136954712622	0.998879330486655	Mrps17
-0.213693463456204	8.41072191444943	2.0921226388837	0.151226474190339	0.998879330486655	Chpt1
-0.54501494732326	5.51830920792842	2.08311222815225	0.151443654881465	0.998879330486655	Kitl
-0.48744650177845	5.7699640588674	2.07851365807056	0.151892232956582	0.998879330486655	Dnpep
0.170323519381283	9.15447353801103	2.07414361111182	0.152319929024832	0.998879330486655	Rpl31-ps8
-0.471226698348661	5.86655663576066	2.07092382754381	0.152635931180235	0.998879330486655	Morf4l2
0.536224451028021	5.54765377365205	2.06385702100857	0.153332131185127	0.998879330486655	Tom1l2
0.372530016050366	6.58475058094309	2.06323987540215	0.153393102988848	0.998879330486655	Psmd8
0.897173840807175	4.495683573558	2.05941385635646	0.153771720739753	0.998879330486655	Aggf1
0.288091309122886	7.30465701182598	2.05915358364476	0.15379751586233	0.998879330486655	Retreg1
0.676830835025508	5.00185106207795	2.05878782806396	0.153833773569135	0.998879330486655	Slc35e1
0.222779077242172	8.13072294052565	2.05616233778219	0.154094328753483	0.998879330486655	Rpl29
0.58262084528906	5.37249040063003	2.05593010555716	0.154117399956786	0.998879330486655	Rsph3b
-0.546234795777008	5.51774414683508	2.05321658614169	0.154387269308023	0.998879330486655	Mrps31
0.16007266846872	9.42091014528662	2.05233168037182	0.154475393524116	0.998879330486655	Sod2
0.744362959869031	4.80014652758276	2.04764464517612	0.154943119581982	0.998879330486655	Snrpb2
0.469522216624297	5.87044052617509	2.04096021210515	0.155612982216054	0.998879330486655	Bves
-0.26252455288775	7.55072128012312	2.0347971391222	0.156233544327701	0.998879330486655	Tuba1b
-0.627806068360126	5.15161974379823	2.03154626125036	0.156562020715135	0.998879330486655	Fbxo6
0.425377849551202	6.17718383830814	2.03115567604874	0.156601539706417	0.998879330486655	E2f6
0.614437617477388	5.2194376262699	2.03029042037141	0.156689126152845	0.998879330486655	Bet1
0.598830714738755	5.33445794174734	2.03109460904504	0.156820210614849	0.998879330486655	Rps15a-ps5
0.304814350484031	7.12489819703404	2.0256039088551	0.157164502214	0.998879330486655	Grsf1
-0.547576020846849	5.56509300156026	2.03605462499638	0.157320603527706	0.998879330486655	Gde1
-0.377164746798596	6.5062263421956	2.02168508100914	0.157563280665003	0.998879330486655	Cd164
-0.460465998850675	5.89440164900212	2.02002684081633	0.157732372581877	0.998879330486655	Psmd13
-0.603423660805245	5.25263368193468	2.01925762042711	0.157810881332344	0.998879330486655	Klhl41
0.742759326555198	4.80159223452837	2.01893607780214	0.157843712168697	0.998879330486655	Dmxl1
0.202807955616988	8.46525140301825	2.01535329543568	0.158210060762848	0.998879330486655	Rps24
-0.726092232229016	4.86972118403297	2.01555284156377	0.15852256702954	0.998879330486655	Gm6644
-0.344932884454777	6.75757856827797	2.00880375086213	0.158882298567076	0.998879330486655	Tmem134
-0.522632685180956	5.59172822746996	2.00598628246094	0.159172490543781	0.998879330486655	Ftl1-ps1
0.382141729903639	6.84824532074852	2.06588707011832	0.159273376191262	0.998879330486655	Agpat3
-2.76918368748497	6.64276672623308	4.45169479274998	0.160236211005679	0.998879330486655	mt-Nd4l
-0.358232685547863	6.6753577476209	1.99492127071688	0.160362558269056	0.998879330486655	Asb14
-0.434704327311972	6.06885798122842	1.99392323243598	0.160421869974294	0.998879330486655	Prelid3b
0.433098958105721	6.09184944732649	1.99330502699055	0.160486201492415	0.998879330486655	Svil
0.6535257520424	5.04952205630587	1.99127216628359	0.160697954042456	0.998879330486655	Lsmem2
0.836095329546779	4.56815964021223	1.9874430018458	0.161097692890948	0.998879330486655	Trip11
0.406456321426437	6.3195361533801	1.98270782763249	0.161605487907226	0.998879330486655	Etfrf1
0.61810221086517	5.2171286412016	1.98319038877577	0.161804268496591	0.998879330486655	Gm12251
-1.46301958382768	13.5549983488877	4.39400261262605	0.161926675111356	0.998879330486655	mt-Co1
-0.598497958639739	5.25117036610451	1.97130392218727	0.162795146519135	0.998879330486655	Ddx1
-0.453433753455049	5.89126875698962	1.96701651782805	0.163249542658457	0.998879330486655	Mrpl43
-0.391579220036516	6.3819748757207	1.9626670885171	0.163712008624423	0.998879330486655	Ptcd3
0.556049669552721	5.41549136123214	1.95984162083903	0.164013245144739	0.998879330486655	Osbp
-0.139566422150597	9.99093127824595	1.95705789339504	0.164310657581743	0.998879330486655	Nme2
0.603034473511553	5.22406952565274	1.95341860442657	0.164700417793128	0.998879330486655	Tns2
-0.625187345581835	5.2066578603929	1.95742614092153	0.165460000699695	0.998879330486655	Fdx1l
-0.520107885206946	5.54945452199666	1.94390835998488	0.165723998291871	0.998879330486655	Actr3b
0.471957373859794	5.76838570219145	1.94086851166912	0.166052724267066	0.998879330486655	As3mt
-0.483978472449747	5.69311336901117	1.93681822531583	0.166491890249424	0.998879330486655	Nisch
5.75434552239358	13.1502770456027	4.23145662982394	0.16685596687668	0.998879330486655	Gm28439
-0.411773931626606	6.19424469603838	1.93232085602043	0.166981107698692	0.998879330486655	Usf2
-0.594353877267683	5.24934695364273	1.92776612946037	0.167478260525449	0.998879330486655	Mospd1
-0.641567856532487	5.03432062707044	1.9240553854075	0.167884558650789	0.998879330486655	Rilp
-0.475149924671908	5.7630806651886	1.9135158660849	0.169056604993002	0.998879330486655	Emc4
0.627978360004299	5.09942502930676	1.91292869433183	0.169109706688534	0.998879330486655	Ckb
0.274002846990302	7.38467587549979	1.90978747731077	0.169626431615905	0.998879330486655	Rbm24
0.699539337863818	4.8622174731106	1.90814588759651	0.169639517951785	0.998879330486655	Nabp2
0.469119912022688	5.77063496411164	1.9036207918098	0.170142553928789	0.998879330486655	Agpat2
0.510886475813975	5.58644509814478	1.90348253773361	0.170157950267981	0.998879330486655	Bmpr1a
-0.566020571792044	5.33948456446859	1.90192332241456	0.170331700533362	0.998879330486655	Pfkl
0.594983858917211	5.33245530421781	1.91265052247655	0.170669042686698	0.998879330486655	2300009A05Rik
-0.161015348075287	9.22941157911437	1.8978407798367	0.170787612142088	0.998879330486655	Rps14
0.523127083903828	5.55265805641777	1.89699167562816	0.171005821320134	0.998879330486655	Ccpg1
-0.478743346070364	5.69047617756926	1.89052139636442	0.171608543149722	0.998879330486655	Gm3362
-0.185108447154644	8.65511844292499	1.89011468516745	0.171654293438179	0.998879330486655	Acsl1
0.780766137321665	4.63813465644125	1.88942045785551	0.171732418674357	0.998879330486655	Cog4
0.281610732815879	7.23941185640237	1.88825739061494	0.171863397608901	0.998879330486655	Rpl17-ps9
0.299704318333419	7.09598336334972	1.88698015470274	0.172007367330966	0.998879330486655	Cat
-0.631371884060824	5.02925237295924	1.88583277651774	0.172136818965864	0.998879330486655	Sec11c
0.534629582556117	5.45525302941331	1.885293251063	0.172197729423349	0.998879330486655	Tspo
0.276405558367394	7.30165659578401	1.88459741464351	0.172276323789447	0.998879330486655	Sh3bgr
0.297098751883999	7.10594250519414	1.88270497532265	0.172490284709138	0.998879330486655	Polr2l
0.217644345019618	8.06020904035319	1.88163329490756	0.172611586790991	0.998879330486655	Asb2
-0.268354854448382	7.36590363313131	1.87733354725547	0.173099267265464	0.998879330486655	Gm10335
-0.330388054142865	6.801807143591	1.8740161674519	0.173476621523089	0.998879330486655	Mrps28
0.617293914872791	5.10465901870187	1.87377230637221	0.17350439860576	0.998879330486655	Alyref
-0.560041098631542	5.38503889918104	1.87444169199637	0.173604043476098	0.998879330486655	Tor1aip2
-0.477231931092097	5.68948952506271	1.87134477191996	0.173781189944728	0.998879330486655	Pf4
-0.512604756045874	5.7103171780002	1.89981732549706	0.17380716730502	0.998879330486655	Mrpl23
-0.122457414925704	10.9645362122914	1.87079153688667	0.17384434250997	0.998879330486655	Lpl
-0.54843697716848	5.37947647627876	1.86959920460541	0.173980539708028	0.998879330486655	Abhd17a
-0.463124606935825	5.75702363334631	1.86843046041445	0.174114162960833	0.998879330486655	Srp54c
-0.440623054328379	5.91815922365997	1.86782526310834	0.174183402457792	0.998879330486655	Actr10
-0.328383685336764	6.81514647122213	1.86577451318406	0.174418263226474	0.998879330486655	Timm13
0.547638327057791	5.41923870026664	1.86228399232512	0.17481886065819	0.998879330486655	Emp1
-0.616087307818964	5.08414810860099	1.85980998987554	0.175103443581847	0.998879330486655	Polr2b
0.30009590287621	7.04928601035501	1.85864892603783	0.175237185919723	0.998879330486655	Abcc9
0.673834161988129	4.91398307585995	1.85759334663716	0.175358880779727	0.998879330486655	Zmat5
-0.558394107236837	5.33566721832639	1.85747598321011	0.175372417365282	0.998879330486655	Hectd1
-0.571659957844747	5.28950464018776	1.85678609190904	0.175452013369663	0.998879330486655	Cited2
0.56904128114549	5.30782093316731	1.85001366840623	0.176235617570852	0.998879330486655	Tnks2
-0.536754841016251	5.42148330426571	1.84794284105311	0.176476036321214	0.998879330486655	Npepl1
-0.402346741347419	6.18983952100671	1.84704376944876	0.1765805356339	0.998879330486655	Chtop
-0.154400377144471	9.32001918228924	1.84579277138803	0.176726059448351	0.998879330486655	Cs
0.66791293202256	4.91758851705822	1.84490808945579	0.176829055488653	0.998879330486655	Ppp2r2d
0.457137844930948	5.79953052697931	1.84199628619063	0.17716854662223	0.998879330486655	Rmdn1
-0.389030306283089	6.30900406416261	1.83901602908383	0.177516806074811	0.998879330486655	Cct6a
-0.14471409104993	9.59404358141584	1.83856188767446	0.177569945061956	0.998879330486655	Bsg
-0.555348069915377	5.33340659671522	1.83775714604904	0.177664153274018	0.998879330486655	Gm15387
0.518781444238454	5.49222999225378	1.83756969389171	0.177686105994943	0.998879330486655	Marc2
-0.626761488722552	5.02747887440525	1.83710977448741	0.177739981049496	0.998879330486655	Pgam1-ps2
0.575713950163376	5.27107307260089	1.8326611180103	0.178262082380573	0.998879330486655	Usp15
0.150721848898135	9.38532301889217	1.8270033478074	0.178928674712567	0.998879330486655	Gm7336
0.324972886262179	6.81852426392232	1.82507741181817	0.179156249909409	0.998879330486655	Rpl30
-0.543023176250235	5.37652322489079	1.8239232133575	0.179292795913207	0.998879330486655	Sqor
0.51650560226489	5.49303664750333	1.81811208108878	0.179982123932279	0.998879330486655	Smim12
0.601370419278551	5.14799927727695	1.81680499250143	0.180158609544099	0.998879330486655	Klhl7
-0.384920421774409	6.33094990072128	1.81561854868387	0.180278860695603	0.998879330486655	Fsd2
0.286625244480259	7.15396916838095	1.81549484436685	0.180293596705316	0.998879330486655	Myl6
-0.488317226145979	5.73187383171216	1.83084970496595	0.180362972968873	0.998879330486655	Abhd18
-0.163274779431297	9.07283929794122	1.81301816318898	0.180588922450472	0.998879330486655	Mrpl42
-0.533637054105551	5.42112407564362	1.81087677438724	0.180844722975833	0.998879330486655	Rpn2
0.660228136401582	4.92029920057285	1.80551661526819	0.181486882809914	0.998879330486655	Fcf1
-0.591697925142491	5.13260136797128	1.80444841994719	0.181615173631197	0.998879330486655	Slc41a3
-0.129770799237337	10.2097603093055	1.80411993751171	0.181654645869972	0.998879330486655	Cd36
0.734278438682839	4.70364208654067	1.80409417615575	0.181657741919212	0.998879330486655	Chtf8
-0.53163489487046	5.41843951475639	1.80277058833278	0.181816896345477	0.998879330486655	1110008P14Rik
0.347128934077812	6.60826827756836	1.79932541277239	0.182231926088343	0.998879330486655	Arpc5l
0.275831277291198	7.23178239344257	1.7987814181847	0.182297560754078	0.998879330486655	Ndfip1
-0.594904347535738	5.13496119149754	1.79625374900946	0.182602895246354	0.998879330486655	Lims2
0.312660610101564	6.8749439227383	1.79253682694475	0.18305297599566	0.998879330486655	Gyg
-0.313295520373622	6.8901038096186	1.79106671313542	0.183231349975867	0.998879330486655	Arpc2
-0.529763946182191	5.41750250595712	1.78789122141648	0.183617338647715	0.998879330486655	Cand2
-0.53925060847897	5.37463342319389	1.78348736247611	0.184154216203699	0.998879330486655	Ddx3y
-0.316843109033643	6.84338482429495	1.77294055769914	0.185447483170457	0.998879330486655	Tmem59
0.67868249452188	4.9120515954686	1.77902432599449	0.185832238573808	0.998879330486655	Olfr1033
-0.515657174102714	5.45816431436372	1.76962706186245	0.185855986772988	0.998879330486655	Atg4d
-0.575196748668432	5.18225411953583	1.76039481156496	0.186999766280353	0.998879330486655	Synpo2l
-0.231265246768136	7.72616569263303	1.76024304753526	0.187018637202854	0.998879330486655	Eef1g
0.726585610052798	4.70657909992777	1.75585055779025	0.187565786941089	0.998879330486655	Inka2
0.328381573301002	6.70653041686405	1.75487211440373	0.187687922602465	0.998879330486655	Kcnk3
0.588828017245489	5.15429548568001	1.75447333548217	0.187737727586863	0.998879330486655	Hp1bp3
0.540824950488821	5.35207301532774	1.75080201273417	0.18819698336592	0.998879330486655	Ddx17
0.491186135117861	5.56387072438629	1.74410418877611	0.189038240349548	0.998879330486655	Chrac1
-0.583710412920967	5.12862576839239	1.74327107673301	0.189143189518196	0.998879330486655	Rtcb
-0.121047387825436	10.6603858631639	1.74236949122082	0.189256841703876	0.998879330486655	Uqcrh
-0.421547655905222	5.93915868748859	1.73858993397683	0.189734161090853	0.998879330486655	Polr2c
-0.400085909817145	6.10625962769466	1.7385767097002	0.189735833667333	0.998879330486655	Mrpl57
-0.237273997842071	7.61359498668978	1.73365914082671	0.19035900179207	0.998879330486655	Pla2g16
0.536810092660716	5.35408751868593	1.73364879015618	0.190360315997492	0.998879330486655	Ddrgk1
-0.197202386298819	8.25587218285867	1.73130430395383	0.190658266585427	0.998879330486655	Rps6-ps4
-0.391396193843418	6.18346170352904	1.72670374764861	0.19124452961765	0.998879330486655	Gm2606
0.302216123808051	6.91719477901456	1.72616042321947	0.191313907273519	0.998879330486655	Tmbim6
-0.591022513937082	5.13099066197218	1.72645849193949	0.191448210855977	0.998879330486655	Htatsf1
-0.501145587060379	5.49477532381371	1.72337096005204	0.19167056414929	0.998879330486655	Arfgef1
0.21183981003068	7.9788824530207	1.71236729772643	0.193085145387295	0.998879330486655	Trp53inp2
-0.231344042612154	7.69219022231364	1.71176740839646	0.193162617851414	0.998879330486655	Crat
0.691186710022718	4.76738660136628	1.70946875968529	0.193459815751391	0.998879330486655	Esyt2
-0.687345163377979	4.77131974340847	1.70943181932648	0.19346459626561	0.998879330486655	Zkscan3
-0.391990354906976	6.15667684892128	1.70875256739292	0.193552524268858	0.998879330486655	Ccny
0.526430406630012	5.3913105624813	1.7084246973199	0.193594983372599	0.998879330486655	Dync1li2
0.495299653218469	5.53358193026151	1.7060166226913	0.193907165750818	0.998879330486655	Tcn2
-0.499681504160591	5.49545596598145	1.70122111828498	0.194530626832351	0.998879330486655	Maob
0.604114592959109	5.02538787222801	1.69787376099227	0.19496721878107	0.998879330486655	Mfap1b
0.564549705516788	5.19914167295639	1.6967773567527	0.195110473221316	0.998879330486655	Stx4a
0.695899481650182	4.76527441936662	1.69535583155482	0.19529639272842	0.998879330486655	Nubp2
0.686206943186854	4.76936862866757	1.69498047115272	0.195345520594889	0.998879330486655	Mrps18b
-0.39823394804685	6.10712004743578	1.6917691423349	0.195766423088907	0.998879330486655	Clpx
-0.376775096802928	6.50357724942514	1.71844571511755	0.195772062841929	0.998879330486655	Ppp1r3c
0.449106242485844	6.24310981132709	1.74910915766586	0.196103598032676	0.998879330486655	Id1
-0.413370154649573	5.93503510249842	1.68665602526241	0.196438804899249	0.998879330486655	Prkag1
0.449727490148325	5.74883360013488	1.68596397566886	0.19657280409671	0.998879330486655	Map2k3
-0.459149661853481	5.68043862193053	1.68480986842672	0.196682248145051	0.998879330486655	Nkx2-5
0.296561713122245	6.94390547021864	1.68124740122252	0.197153022543836	0.998879330486655	Fis1
-0.656690713317825	4.83374337355793	1.67982444319873	0.197341436953045	0.998879330486655	Mapk9
-0.658532455137466	4.83492224788226	1.67967652939548	0.197361034506074	0.998879330486655	Anxa3
0.233432419560277	7.64732142926986	1.6755784797614	0.197904915331831	0.998879330486655	Gm7331
0.598864671890529	5.02703440240611	1.67448164849319	0.198050784531929	0.998879330486655	Stag2
0.235405735253194	7.62358279819591	1.67224055218298	0.198369780106966	0.998879330486655	Pcbp2
-0.411045480357538	6.02777218392615	1.6750552810896	0.198399945316808	0.998879330486655	Akap6
-0.380297617503876	6.23036223848286	1.67138926601095	0.198462731422595	0.998879330486655	Sypl
0.3474718906568	6.48112360888214	1.66296922300726	0.199589552619493	0.998879330486655	Anapc13
-0.687508320343664	4.77330207681736	1.66121389932121	0.199988575305683	0.998879330486655	Cux1
-0.545272441760958	5.27547039590096	1.65669063973552	0.200434731717396	0.998879330486655	Hikeshi
-0.655689004576916	4.83217350550124	1.65011090545749	0.201325012608689	0.998879330486655	Copb1
-0.344270889993316	6.53163171940578	1.64926853055598	0.201609461753171	0.998879330486655	Neat1
0.514064463919386	5.39706816357973	1.64767917112282	0.201655230190702	0.998879330486655	Ethe1
0.40673946631017	6.05821599077646	1.65070078201165	0.201696928724006	0.998879330486655	Rps2-ps13
-0.377112550338344	6.2289398781617	1.64727806967896	0.201709759602179	0.998879330486655	Cul3
-0.630429746458927	4.8929937097165	1.64680515945684	0.201774073866124	0.998879330486655	Ptpn3
0.472818274410398	5.65851656913355	1.65392176013823	0.201801555865836	0.998879330486655	Synj2bp
0.680960231104023	4.77122021604889	1.64514829800551	0.201999594003966	0.998879330486655	Metap1
0.309301897964609	6.81069585916847	1.64159599215996	0.202484119026812	0.998879330486655	Tm9sf2
-0.354243185950587	6.40636528924571	1.64152992128539	0.20249314399703	0.998879330486655	Tmed10
-0.273556165214369	7.12648187531534	1.64081083264811	0.20259139905309	0.998879330486655	C1qbp
-0.536212369725872	5.27219796487761	1.63508281401012	0.20337609384406	0.998879330486655	Tiprl
0.430222004006045	5.785035027097	1.63426565140848	0.203488333335344	0.998879330486655	Mrps6
0.163991690008583	8.81593094159158	1.6330418238671	0.203656567242235	0.998879330486655	Ndufs4
0.279869673690856	7.09307799049795	1.62892224053291	0.204244477267686	0.998879330486655	Ran
0.773779165486404	4.52847370181699	1.62509071828169	0.204753610046553	0.998879330486655	Prkab2
0.18724207278948	8.32349816663237	1.62152515143122	0.205247849030731	0.998879330486655	Ndufs5
-0.608530897286437	4.95108348047256	1.61785152011198	0.205758554893751	0.998879330486655	Kras
-0.334785716551554	6.52547148882099	1.614520919472	0.20622288258202	0.998879330486655	Ppm1a
-0.653850229395192	4.83099579755921	1.6143795826882	0.2062629501626	0.998879330486655	Tmem141
0.592315825712029	5.0301978983737	1.60936648844035	0.206943941127925	0.998879330486655	Sdc2
0.328179537864644	6.60097708894738	1.60884429168007	0.207017159422346	0.998879330486655	Bod1
-0.606724057802488	4.94992736004044	1.60503227326085	0.207552588074211	0.998879330486655	Kpna6
-0.428228953941575	5.77558078068025	1.60318547078315	0.207812580697272	0.998879330486655	Jak1
-0.224220291235806	7.67951995214056	1.60278237003351	0.207869380860405	0.998879330486655	Capns1
0.404370193591918	5.94537440216943	1.60232081566631	0.207934440379117	0.998879330486655	Arl2bp
-0.392573042466208	6.01654281376049	1.5978477988182	0.2085662069073	0.998879330486655	Hnrnpa3
-0.603825033008485	4.94928291756566	1.59701107272518	0.208684640103201	0.998879330486655	Rbbp6
-0.606997403397315	4.94979951888146	1.59422362875995	0.209079765085039	0.998879330486655	Szrd1
-0.512796059984188	5.3608921401703	1.59416625299344	0.209087907585698	0.998879330486655	Pon2
-0.364292845998623	6.27124947462348	1.59016119234744	0.20965722504301	0.998879330486655	Gm9803
0.311325471706299	6.71286295109946	1.5891320649458	0.209803814218216	0.998879330486655	Rnaset2b
-0.460486929880305	5.60144700103418	1.58507788524573	0.210382486667609	0.998879330486655	Ubxn6
-0.519006803182719	5.3139683015225	1.58385422491056	0.210557520577325	0.998879330486655	Dynlt3
0.368941499901415	6.27905713348241	1.58180296735619	0.21089328712597	0.998879330486655	Thoc7
-0.423304174351403	5.7728905763929	1.57970241965041	0.211152700306435	0.998879330486655	Hccs
-0.253055798452802	7.28995376906055	1.57865092643286	0.211303756025724	0.998879330486655	Aldh6a1
0.250521526795518	7.33224501084491	1.57803906923441	0.211391713939318	0.998879330486655	Nenf
-0.585934305897953	5.00637029749663	1.576572785594	0.211602678964871	0.998879330486655	Tmod3
-0.51926067839118	5.31384986761912	1.57500156799128	0.211829021558406	0.998879330486655	Tmem143
-0.383879919033689	6.07017952525085	1.57493914929902	0.211838019304401	0.998879330486655	Khdrbs3
0.342654621491311	6.43291912524304	1.57414630227349	0.211952349218858	0.998879330486655	Timm10
-0.627338495828034	4.8904022021212	1.57175122999017	0.212398370617002	0.998879330486655	Oard1
0.128656239898876	9.82630363529923	1.57062962248433	0.2124603526361	0.998879330486655	Eif1
0.391411545288082	6.0411938582803	1.5700612510261	0.212542593877623	0.998879330486655	Cox16
0.30417142938057	6.758432989405	1.56690308044196	0.213000265219761	0.998879330486655	Mff
-0.645827941381545	4.82863840191752	1.5660695174275	0.213224997683446	0.998879330486655	Gm24474
0.659218198265804	4.82501231581886	1.5694519920615	0.213263318525721	0.998879330486655	Rbpms2
-0.849407815887494	14.668307181763	3.04690856942949	0.214053066167052	0.998879330486655	mt-Nd4
-0.363492009469373	6.24636579028046	1.55735322566429	0.214391406490935	0.998879330486655	Smyd2
-0.420324918380042	5.77095705958992	1.55700209145617	0.214442764198653	0.998879330486655	Shld1
-0.580569190521318	5.00293587198674	1.55562697953754	0.214644033508824	0.998879330486655	Lzts2
-0.302387122556201	6.76889075047533	1.55134985838707	0.215271509320368	0.998879330486655	Serpinb6a
0.482532924585607	5.47482688241449	1.55107985904758	0.215311193500929	0.998879330486655	Bmpr2
-0.58539324027259	5.00662348908107	1.54978740126576	0.215501279178901	0.998879330486655	Mef2c
0.355475553585116	6.32144693565914	1.54775590887569	0.215800464640522	0.998879330486655	Cops3
0.188015581831833	8.25376500405144	1.54771485459047	0.215806516002084	0.998879330486655	Obscn
-0.441080568513233	5.67182664689915	1.54328058719002	0.216461325199671	0.998879330486655	Mrpl38
0.377337766084544	6.11289023938821	1.54132214077621	0.216751289801743	0.998879330486655	Usp13
0.322256288262778	6.57344664852236	1.54114923543801	0.216776912339375	0.998879330486655	Sgcb
0.529332823191839	5.2845427661871	1.54137292101863	0.216910275592771	0.998879330486655	Kansl2
-0.581274234991299	5.00458628233867	1.53538456190361	0.217633258944971	0.998879330486655	H2-Eb1
-0.349805977202863	6.3603739679594	1.53521099920159	0.217659104880717	0.998879330486655	Mbnl1
0.413384906967875	5.84387057545237	1.53492036897532	0.217714088712491	0.998879330486655	Vps35
0.389435633419184	5.99720740703636	1.5347659170391	0.217725400783286	0.998879330486655	Pkp2
0.470398805329256	5.51027315817423	1.53434292397389	0.217788428997998	0.998879330486655	Srf
0.548485451053368	5.12644911141024	1.52954922360014	0.218504253277237	0.998879330486655	Pea15a
-0.34920682434839	6.35786614177179	1.52881907677509	0.218613531706654	0.998879330486655	Amfr
-0.500853610808099	5.35542711973763	1.5281943856643	0.218707079224117	0.998879330486655	Ppid
0.610805936803702	4.88978227622627	1.5247608676603	0.219222110597023	0.998879330486655	Gm13392
0.549682146682468	5.12706461600023	1.52216087376104	0.219613085182926	0.998879330486655	Arhgap5
0.638202397044306	4.83443088871402	1.52130405450049	0.219762057948554	0.998879330486655	Ttc33
-0.41712112541066	5.7691297188896	1.52054593007693	0.219856355907189	0.998879330486655	Gm15417
0.480330004142878	5.47368762394268	1.51996541354059	0.219943882726842	0.998879330486655	Scn5a
0.42779315400805	5.78377421333297	1.52362361850554	0.220050842275583	0.998879330486655	Ssr2
-0.332804974601117	6.46110639564878	1.51807433500783	0.220229299836641	0.998879330486655	Kdelr1
0.287327581299277	6.87355137960832	1.51643263288248	0.220477441354272	0.998879330486655	Tomm6
0.385477397778372	5.99862655666062	1.51551505107383	0.220616279814798	0.998879330486655	Rnf114
0.114976911370227	10.5696183264765	1.51539732290461	0.220634100790606	0.998879330486655	Atp5h
0.358276632062654	6.28151173588306	1.51517343513235	0.220667996355886	0.998879330486655	Ptpn11
0.402626954845115	5.87259995300063	1.51191170743334	0.221162520137064	0.998879330486655	Acacb
-0.307753395180632	6.66594640312232	1.51138463772019	0.221242556809054	0.998879330486655	Snrpd2
0.317183413233572	6.59070023877384	1.50758558378398	0.22182048702482	0.998879330486655	Rbm39
-0.547922603434051	5.11034921803499	1.50556762597191	0.222128209836955	0.998879330486655	2310022A10Rik
0.283547735905061	6.91364116936607	1.50308624124811	0.222507308974432	0.998879330486655	Myadm
-0.369775534534906	6.1188306924453	1.50301647115134	0.222517979553886	0.998879330486655	Pacsin3
0.344970374791298	6.36213711513197	1.50117269618482	0.222800189198621	0.998879330486655	Ces1d
0.181679898997568	8.30204332356361	1.49841524495504	0.223223054718834	0.998879330486655	Mpc1-ps
-0.377064536042829	6.17834506956866	1.50412336924212	0.223317247582374	0.998879330486655	Acta2
0.406855111394055	5.84411184437851	1.49726020149865	0.223400473335712	0.998879330486655	Ubl3
-0.370795884494891	6.11835457178983	1.49577163147319	0.2236293743712	0.998879330486655	Egfl7
-0.546695583160146	5.10897745570324	1.49554534176482	0.223664196327118	0.998879330486655	Tpm3
-0.403629750111976	5.83137653508085	1.49363362581326	0.223958637311924	0.998879330486655	Lamtor5
0.709205283010298	4.60552438942813	1.49345508876715	0.223986159384679	0.998879330486655	Arf2
-0.575105812757387	5.00153307250151	1.49263619473535	0.224112447040568	0.998879330486655	Adi1
0.360583504101877	6.52785381250081	1.52142770044176	0.224414939067304	0.998879330486655	Corin
-0.361455391178658	6.21930096867805	1.48829348761275	0.224783609945707	0.998879330486655	Wdr1
-0.420960199859992	5.73525240170347	1.4874435881858	0.224915245989005	0.998879330486655	Nsmce4a
-0.545371987754755	5.10959743139273	1.48677041046032	0.225019576879629	0.998879330486655	Rps18-ps3
0.384527020426511	5.99813326944067	1.48633570700609	0.225086979532212	0.998879330486655	Prepl
0.605926835015869	4.89172743450638	1.48431673355171	0.225400350842405	0.998879330486655	Tusc2
-0.297567307320288	6.73185018688551	1.48143078668578	0.225849206147568	0.998879330486655	Rnf10
-0.237910633175788	7.39355543630583	1.48076331082344	0.225953173774301	0.998879330486655	Dynlrb1
-0.476171374605025	5.4379796505181	1.47663439503397	0.226597594562894	0.998879330486655	Becn1
0.263206662357718	7.17429108530713	1.48041483701908	0.22660929195785	0.998879330486655	Serinc1
-0.401275965643125	5.83084060146344	1.47627500746021	0.226653791359421	0.998879330486655	Maged1
-0.454613664369711	5.55789061259415	1.47422701981759	0.226974354362233	0.998879330486655	Azi2
-0.410209564378401	5.86690897720746	1.47438889325128	0.227940814923131	0.998879330486655	Srsf1
0.40163584613391	5.84684954646304	1.4679608013251	0.227958601759255	0.998879330486655	Gnb1
-0.315469000586395	6.55522856985946	1.46360757612786	0.228645422537312	0.998879330486655	Slc30a9
-0.447794976167832	5.55402738816578	1.46271231518014	0.228786981863296	0.998879330486655	Ptges3l
-0.36020475406883	6.16709934280758	1.46192815180395	0.228911061846819	0.998879330486655	Tcim
0.391755253266995	5.90044744597779	1.46082580911141	0.229085626374791	0.998879330486655	Pdk1
0.254737175543345	7.17916501420955	1.46054600045517	0.229129961988645	0.998879330486655	Mrps23
0.582520512815987	4.94520312037241	1.45860658022814	0.229437549468642	0.998879330486655	Hnrnpr
0.511969465287174	5.29211447764468	1.45783497567614	0.229608843872897	0.998879330486655	Snta1
-0.53203195311645	5.15932100383083	1.45627079343912	0.229808666342507	0.998879330486655	Dhrs3
-0.370363540300143	6.14435288204035	1.45689885862925	0.230010791603218	0.998879330486655	9530068E07Rik
-0.398043424732308	5.86122851303969	1.45333759833146	0.230275735712931	0.998879330486655	Mrpl39
-0.379119733794145	6.00893740044601	1.45114962958012	0.230624890535467	0.998879330486655	Golph3
0.389258134639019	5.90271719836591	1.45039000064405	0.230746262316583	0.998879330486655	Derl1
-0.337457712136651	6.39680325748273	1.45002365025875	0.230824432006481	0.998879330486655	Ube2l3
0.580236735535339	4.94622965279574	1.44964011731626	0.230866153219393	0.998879330486655	Iars
0.580236735535339	4.94622965279574	1.44964011731626	0.230866153219393	0.998879330486655	Gm13835
-0.222940271580881	7.5484380969177	1.44891272754829	0.230982520311968	0.998879330486655	Gsto1
0.285900594513759	6.84741237926969	1.44763690811607	0.231186797124838	0.998879330486655	Lamp2
0.585588165838089	4.94238591148405	1.44735577022188	0.231231840862293	0.998879330486655	Gtf3c6
-0.135322709404308	9.36293661417781	1.44583743212736	0.231475292812531	0.998879330486655	Ivns1abp
0.54187389811719	5.35466252878637	1.46700884950489	0.232372352437815	0.998879330486655	Ubap2l
-0.43172349981788	5.62721422267044	1.44023131043792	0.23237689296814	0.998879330486655	Dpy30
-0.437504734807621	5.58938348969317	1.43967553129534	0.232466508638282	0.998879330486655	Gns
-0.255822778148225	7.15527673488876	1.43515915802138	0.233196307965982	0.998879330486655	Ank
0.369403994844429	6.05061478956951	1.43228863630043	0.233661607039021	0.998879330486655	Ppp1r12b
-0.538786327491954	5.10684752397919	1.42966052665016	0.234099444216003	0.998879330486655	Ccl6
0.405346612855914	5.76802619148444	1.4267516529729	0.234562332191568	0.998879330486655	2610001J05Rik
0.437120125403147	5.58404749721051	1.42424671997611	0.234971212876148	0.998879330486655	Eif4e3
-0.530553580342012	5.15808504056651	1.42487253416104	0.23502392699591	0.998879330486655	Gars
-0.194130824360609	7.99872670569782	1.42179295866107	0.235372585155044	0.998879330486655	Dsp
0.328197046941856	6.42208746139152	1.42020568190883	0.235632669060137	0.998879330486655	Sdr39u1
0.445883294745732	5.55159521238546	1.42009293473904	0.235651156650962	0.998879330486655	Pdcl3
0.38165600791275	5.92967674085543	1.41980970921227	0.235697606059708	0.998879330486655	Spryd7
-0.515366713603283	5.20766095501127	1.41921275630136	0.235795543879914	0.998879330486655	Ndufaf6
-0.517351115535491	5.20864284797155	1.41812966192722	0.235984172065135	0.998879330486655	Ccrl2
-0.433655434427758	5.58769158154904	1.41688492968255	0.236177929366476	0.998879330486655	Timp4
-0.519513101958179	5.15362775637701	1.41683912595068	0.236185461017918	0.998879330486655	Ctsc
0.444584425210785	5.55092394016926	1.41333795859097	0.236762039257938	0.998879330486655	Ppdpf
0.518424510349701	5.17689533603528	1.41241714525473	0.236913966220376	0.998879330486655	Ube2f
-0.434129472306013	5.58746984973987	1.41039328632878	0.237248306438051	0.998879330486655	Mrpl22
0.440253226459922	5.58180389026218	1.4097624014567	0.237352646248475	0.998879330486655	Top2b
0.408616356328542	5.74010876282159	1.40727140441455	0.237765172520092	0.998879330486655	Dennd5a
0.333453315247359	6.367025590937	1.40703981213075	0.237803570377344	0.998879330486655	Cenpb
-0.36816416923459	6.03243653668632	1.40628931004365	0.237928055339913	0.998879330486655	Anapc5
0.433553286726021	5.58607050628977	1.40294522205628	0.238483706570477	0.998879330486655	Ube3a
-0.223470101305199	7.46950138629166	1.39648741000852	0.239561239016797	0.998879330486655	Mrps24
0.377430403960448	5.93102247805769	1.39636686946765	0.239581408751993	0.998879330486655	C1qc
-0.371898632266015	5.97631933763868	1.391989017786	0.240315356870973	0.998879330486655	Ciao2b
-0.423002685546407	5.62263412658826	1.3916608400974	0.240370487022094	0.998879330486655	Rcsd1
-0.164976991079158	8.51913286716015	1.39159853113535	0.240380955978084	0.998879330486655	Gm10250
0.198300455569061	7.84257400055407	1.39108205509568	0.240467754203713	0.998879330486655	Glul
0.273492813464076	6.90568700169432	1.39080869647989	0.240513710028478	0.998879330486655	Selenof
0.551562796380651	5.00003799691714	1.39061122864651	0.240546914140782	0.998879330486655	Ndufaf7
-0.356242585042293	6.13899348511951	1.39003856751794	0.2406432386295	0.998879330486655	Hint3
0.395194611886908	5.79704814972839	1.38197173449066	0.242005166512516	0.998879330486655	Bcap31
0.632939714820744	4.73485760339775	1.38087431553726	0.242191175267789	0.998879330486655	Mmd
0.627962487809285	4.73684882440785	1.3798889950302	0.242358333454157	0.998879330486655	Gtpbp2
-0.495802290011914	5.25071943715674	1.37768784979048	0.242732267147836	0.998879330486655	Ypel5
-0.241673459295771	7.24703715788724	1.37617714975603	0.242989317605425	0.998879330486655	Kif1c
0.249650867481913	7.15894365341886	1.37423254451828	0.243320691494668	0.998879330486655	Nudt8
0.397311957900881	5.77125837304347	1.37319728984839	0.243497332670006	0.998879330486655	Tor1aip1
-0.503223862782487	5.20189695848264	1.36712608113991	0.244536420513772	0.998879330486655	Prpf8
-0.622726098841515	4.7388418654803	1.36169202932309	0.245471093919689	0.998879330486655	Mterf2
-0.622726098841515	4.7388418654803	1.36169202932309	0.245471093919689	0.998879330486655	Inafm2
0.203866640514223	7.71973310170057	1.35846283139619	0.246028611800444	0.998879330486655	Timm8b
-0.272793671631753	6.91456336037641	1.35887749362724	0.246055458498775	0.998879330486655	Rbx1
0.511642809123614	5.21794206838182	1.35960428188864	0.246253639898122	0.998879330486655	Irak1
0.497735610326389	5.22330544656363	1.35668384032919	0.246336419971992	0.998879330486655	Gm10222
-0.258518480987853	7.00953512533578	1.35326820518969	0.246928739783739	0.998879330486655	Pkia
0.418657902461929	5.65072023271584	1.35276416259237	0.247030629374583	0.998879330486655	Sec61g
-0.388864379513003	5.78988140316638	1.35050938516787	0.247408442198161	0.998879330486655	Lamc1
-0.482456231764786	5.29566652362151	1.35030241872632	0.247444475806716	0.998879330486655	St6galnac6
0.223883718650462	7.41727787203525	1.34976110401292	0.247538751307621	0.998879330486655	Hnrnpk
-0.363020928272221	6.00084792698625	1.34754346184057	0.247925439839351	0.998879330486655	Rab6a
0.246494208430227	7.13955958085715	1.3472606105915	0.247974814027185	0.998879330486655	Asb11
-0.336850240400477	6.25759626357219	1.34712336053649	0.247998776615727	0.998879330486655	Taf10
0.358467243133942	6.05519896214605	1.34427093325306	0.24849743224374	0.998879330486655	Mrpl9
-0.600641201036559	4.80603675330721	1.34191477078534	0.248910266707861	0.998879330486655	Nr1d1
0.283482817563095	6.73939657750689	1.33813638172989	0.249574068273224	0.998879330486655	Rnf187
-0.59560675461699	4.80221959201809	1.33766608185155	0.249656845480635	0.998879330486655	Tln1
-0.478569502580559	5.29374042843044	1.33504271523885	0.250119206500198	0.998879330486655	Epb41
0.588315493430221	5.33519761521094	1.39017965121252	0.250239652036663	0.998879330486655	Rbm5
0.340049600586219	6.38162551298118	1.34287832187389	0.250448606321695	0.998879330486655	Cish
0.450252895989928	5.45371141074136	1.32985802683902	0.251036115147331	0.998879330486655	R3hdm4
-0.402142335210716	5.68885375469661	1.32923339023823	0.251146862486618	0.998879330486655	Hnrnpl
0.527395209434708	5.0507468319052	1.32872362473788	0.251237288172665	0.998879330486655	Gm47283
0.243399967913067	7.18484828470023	1.32681219258466	0.251576710504123	0.998879330486655	Rpl3
0.527151239740803	5.05062186582254	1.32309313227182	0.252238752567986	0.998879330486655	Magt1
-0.263770358058495	6.93905611633509	1.32290880845127	0.252271620802507	0.998879330486655	AC132253.9
-0.510753602254091	5.15004187208166	1.32291209659389	0.252399715252014	0.998879330486655	Fubp1
0.196831936997611	7.79595426061677	1.3220503637896	0.252424766835402	0.998879330486655	Msrb1
0.450529614029132	5.45186843080757	1.3202064287153	0.252754113869007	0.998879330486655	Ahcyl1
0.261203143394869	6.95916306591467	1.31931352596869	0.25291378767208	0.998879330486655	Ywhag
-0.227022026523274	7.34454465507285	1.31900005379231	0.252969874181598	0.998879330486655	Cdc42
0.498492656733381	5.22160639936936	1.31900965898105	0.252987054716534	0.998879330486655	Mkrn1
0.526907287703349	5.05049690434924	1.31512370798559	0.25366470822462	0.998879330486655	Pi16
0.379003839085711	5.83113566505322	1.31342901993968	0.253969224984908	0.998879330486655	Hnrnpd
0.180785692965482	8.076484221967	1.31292352803248	0.254060144207399	0.998879330486655	Trdn
0.482213171361743	5.26597253857861	1.31217187038598	0.2541954142767	0.998879330486655	Nucb1
-0.219426312460997	7.42655031549372	1.30707671886839	0.255114712998646	0.998879330486655	Adipor1
-0.311354207788405	6.42862011781271	1.3049646282415	0.25549700096392	0.998879330486655	Polr2e
-0.21345262658955	7.50465578329165	1.3001609138558	0.256369129253045	0.998879330486655	Atp6v1g1
-0.59402485601871	4.80090466931115	1.29946244454638	0.256506684292883	0.998879330486655	Dcaf7
0.3202771302137	6.40617047964049	1.30006901536138	0.256513612536306	0.998879330486655	Atp6ap1
0.485748243992277	5.26572374475521	1.29890557606891	0.256606487693886	0.998879330486655	Angptl2
-0.310804876286759	6.42887751741611	1.29622007675216	0.257087367976351	0.998879330486655	Rabggtb
0.478395187065794	5.2681432875576	1.29600147951803	0.257127281804523	0.998879330486655	Rabgap1l
0.382577331205083	5.80333896577761	1.29546707851509	0.257224890979183	0.998879330486655	Tfrc
0.357394540979344	5.98721105630463	1.29462799900426	0.257378243314324	0.998879330486655	Acaa1a
-0.48956303005143	5.2979615908892	1.29811627757603	0.257685483151086	0.998879330486655	Gm43672
-0.161314464862659	8.44375711648375	1.28975783480169	0.258270580395428	0.998879330486655	Rpl10-ps3
-0.32285410431286	6.32206781065727	1.28836103507302	0.258527220849152	0.998879330486655	Ddt
-0.334317271687394	6.23077451402215	1.28762548743296	0.258662494251394	0.998879330486655	Cops5
-0.484816490659813	5.24453219013539	1.28364986457381	0.259405559669672	0.998879330486655	Inpp4b
0.518452530488223	5.05477553527893	1.28275536887189	0.259560381692807	0.998879330486655	Zmynd11
0.484677186269026	5.33885594120438	1.287662238	0.259810999234868	0.998879330486655	Snrnp200
-0.548475610095542	4.92168820042342	1.27948714179861	0.26016511595559	0.998879330486655	Arel1
0.397548153094493	5.68847327617656	1.27890635764942	0.260272765034431	0.998879330486655	Sept2.1
-0.572092366711261	4.86258049894154	1.27869290900998	0.260351089232494	0.998879330486655	Otud1
-0.374115713579918	5.81681151461487	1.27796441771215	0.260447473129466	0.998879330486655	Ubxn2a
0.332483549162595	6.25469537398971	1.27671955546017	0.260678591162041	0.998879330486655	Hand2os1
-0.537978072631069	4.9813710169859	1.27644230801168	0.260730099125327	0.998879330486655	Sike1
-0.131810389453819	9.23235381383246	1.27243060414429	0.261476832804239	0.998879330486655	Rps20
0.389227772174404	5.71854981430876	1.27039431206489	0.261856888982668	0.998879330486655	Sf3b6
0.297283701216089	6.55314346483892	1.27026479744124	0.261881085124641	0.998879330486655	Adssl1
0.493924897160187	5.2234354601606	1.26978631551201	0.26233401114736	0.998879330486655	Usp50
-0.442277810328728	5.4198684744479	1.26645549205484	0.262593998961649	0.998879330486655	Ppa1
-0.564079324745287	4.86023269555027	1.26536863293469	0.262797850611316	0.998879330486655	Wdr82
0.33722015845251	6.19255678203648	1.26521135620584	0.262827365894098	0.998879330486655	2610507B11Rik
-0.307513419285911	6.42632148693274	1.26437580819705	0.262984238344662	0.998879330486655	Ddb1
-0.200108535824032	7.7017794944937	1.25985548175452	0.263961041944601	0.998879330486655	Gm11273
-0.238213210873351	7.14739609753369	1.25525828770073	0.264703682875612	0.998879330486655	Glrx3
0.499965050652375	5.10325858365124	1.25357082889936	0.265023459644504	0.998879330486655	Txnrd2
-0.363760180924677	5.87681961399483	1.25034320420786	0.265636452375878	0.998879330486655	Tspyl1
-0.513301536787718	5.0324498999341	1.24968794023903	0.265761117827929	0.998879330486655	Ric8b
-0.382641301335943	5.75228759575456	1.24886820608485	0.265917177555666	0.998879330486655	Csnk2a1
-0.530376508323384	4.97893531605472	1.24507952603401	0.266639957804698	0.998879330486655	Sun1
0.345167378209761	6.037757632083	1.24309031545379	0.267020435023659	0.998879330486655	Tardbp
0.559531588411924	4.85880001528931	1.24303565514925	0.267030899555184	0.998879330486655	Trnau1ap
-0.1214333816717	9.49808323799498	1.24111548007566	0.267398838032916	0.998879330486655	Ndufb2
0.125918204484378	9.35269552171508	1.23925029308117	0.267756850458434	0.998879330486655	Pdha1
0.562345147726836	4.85801828657064	1.23867168739821	0.26786803316161	0.998879330486655	Tial1
0.288191488438373	6.58833135880226	1.23810290818724	0.267977384262485	0.998879330486655	Gfm1
0.463051086973407	5.31089824927106	1.23786089058802	0.268023930582361	0.998879330486655	Rnf130
-0.525762947655991	4.97510349919861	1.23774584142023	0.268046061116415	0.998879330486655	Bax
0.416847014158033	5.53036658076921	1.23630099386674	0.268324183790441	0.998879330486655	Pts
0.331538216997032	6.17292546309536	1.23255783307645	0.269046406527655	0.998879330486655	Mtln
-0.509717591899283	5.03017116923412	1.23198079814704	0.269157959975029	0.998879330486655	Gm12715
0.381536029557488	5.72203434981787	1.2288998141432	0.269754568569353	0.998879330486655	Akap2
0.222143555174572	7.30461210169296	1.22867965842867	0.269797263771824	0.998879330486655	Tesc
-0.450452425782174	5.37620243154098	1.22765003151728	0.270015388601507	0.998879330486655	Serpinb6b
0.329446323551805	6.29316250461951	1.23195071340257	0.270053602613597	0.998879330486655	Selenbp1
-0.319774431667854	6.2731274261504	1.22678511046179	0.270165029208358	0.998879330486655	Brk1
-0.160773541629828	8.40183846839876	1.22655149109294	0.270210422639216	0.998879330486655	Pkm
-0.259316098800406	6.86095820831201	1.22639248989909	0.270241322879179	0.998879330486655	Rps27a-ps2
-0.420714528692744	5.49813383910474	1.22360946078484	0.270782898159085	0.998879330486655	Puf60
0.319252035690035	6.31675849224073	1.22181025354228	0.271171748126675	0.998879330486655	Sh3kbp1
-0.500786411371642	5.08656293099516	1.22059169653954	0.271371700948018	0.998879330486655	Rmnd1
0.382573472999306	5.72256903628864	1.22057904292077	0.271374173223966	0.998879330486655	Mov10l1
0.35501576219973	5.91558467641317	1.22050910624855	0.271387838029628	0.998879330486655	Set
-0.275821829720627	6.68595677114946	1.21963766880887	0.271558179547354	0.998879330486655	Rhoq
0.227543269278106	7.22293657077309	1.21434319975231	0.272596006576551	0.998879330486655	Oat
-0.510252540054479	5.02991952100994	1.21399090926348	0.272665240555228	0.998879330486655	Tcaim
-0.405764334498688	5.6133670975044	1.21469813751388	0.272677956961223	0.998879330486655	Prmt1
0.552854568854372	4.86205500533623	1.21165132791194	0.273125591728237	0.998879330486655	Ppp2r2a
0.347206621165461	6.05956136526575	1.2115389280371	0.273601460128673	0.998879330486655	Anxa7
0.552092747778504	4.86166563970102	1.20892886638952	0.273662518688543	0.998879330486655	Flii
-0.357865822758447	5.87471775225649	1.20801545184302	0.273842962405026	0.998879330486655	Dnajb9
0.187226141205503	7.88925218578677	1.2075638448274	0.274385301369756	0.998879330486655	Rpl35
-0.41821272672827	5.49572444164446	1.20495141981606	0.27444935808729	0.998879330486655	Tmem123
-0.415645302639079	5.5361504434824	1.20353848317502	0.274753782348586	0.998879330486655	Insig2
-0.42055048455849	5.49641831632841	1.20105647906978	0.275222653203418	0.998879330486655	Iqsec2
-0.264673510068749	6.81444935439191	1.19929622996991	0.275663212597263	0.998879330486655	H2-K1
-0.490584069118509	5.08154144707428	1.19771918258752	0.275887431450567	0.998879330486655	Rnf146
0.338505274433181	6.0411499439246	1.19538898214557	0.276352806604317	0.998879330486655	Gadd45gip1
-0.350199292777213	5.93484045522518	1.19488914569148	0.276452760899762	0.998879330486655	Mrpl48
0.173982636649268	8.067663855917	1.19289970477776	0.276851052155555	0.998879330486655	Mrpl51
-0.199626916848325	7.56506216932772	1.19190833870678	0.277049798019837	0.998879330486655	Sptbn1
0.313650464497462	6.29917974539198	1.1906918263728	0.277293927967694	0.998879330486655	Vwa8
-0.384598533364822	5.67925680573206	1.19058764558341	0.277314847680997	0.998879330486655	Zdhhc5
-0.259948619731951	6.9084751372975	1.18894521156732	0.278494414864635	0.998879330486655	Eef1d
-0.340406648782748	5.98936694697924	1.18427631222696	0.278585923329307	0.998879330486655	Cdh13
-0.393805967771797	5.6067474658818	1.17894586563188	0.279665225023765	0.998879330486655	Magoh
-0.164478983351988	8.26326479766126	1.17869166283881	0.279716828409219	0.998879330486655	Popdc2
0.491874123186789	5.10550988968355	1.17858577057487	0.279756333709617	0.998879330486655	Alpk2
0.320987968335842	6.19877649037489	1.1770746296894	0.280045371358214	0.998879330486655	Hnrnpc
-0.392397104186377	5.60740986886869	1.1752772983571	0.280411123206395	0.998879330486655	Actr1a
-0.430462205846865	5.41447882167953	1.17438901044174	0.280592111846904	0.998879330486655	Snapc5
0.289630579619372	6.50639134186345	1.17331547356264	0.280811043536097	0.998879330486655	Psmd12
0.440116615610161	5.35394084172678	1.17071960097586	0.281341332600495	0.998879330486655	Pten
0.525940391145899	4.91820275916965	1.16917820626234	0.281656815092885	0.998879330486655	Spryd4
-0.224526048460951	8.03817635786923	1.22786174353958	0.28172572326964	0.998879330486655	Eif4e
-0.486247315952805	5.07965956714777	1.16846298853905	0.281803354295018	0.998879330486655	Smim27
0.363948020739966	5.7842564736801	1.16757631655286	0.28198515731438	0.998879330486655	Otud6b
0.294245412455783	6.48790800925436	1.16582902878638	0.282492779995486	0.998879330486655	Entpd5
-0.307448984133279	6.31347549693657	1.16329314742384	0.282865487070142	0.998879330486655	Rpl35a-ps2
-0.473917730937993	5.13064394629488	1.16312223517302	0.282900687766315	0.998879330486655	Rnf5
0.473103655893436	5.15328401262713	1.16248453546633	0.283032076296349	0.998879330486655	Stau2
0.297308856716182	6.41646359352127	1.16078541766011	0.283382534698719	0.998879330486655	Apip
-0.262214917794571	6.74858204411779	1.15933122102692	0.283682916046085	0.998879330486655	Klhdc2
0.54695252394613	4.86349113860678	1.15521754033401	0.28457190551496	0.998879330486655	Pfkp
0.452667073426738	5.31580602643353	1.15544874313885	0.284635197716298	0.998879330486655	Dync1h1
0.118151646482248	9.4492238341828	1.15456444675605	0.284670405537744	0.998879330486655	Etfa
-0.464225363192965	5.18117712189616	1.15145833316225	0.285316236351455	0.998879330486655	Calcoco1
-0.28407304635413	6.519019451778	1.15131933836926	0.285345180277494	0.998879330486655	Atp6v0b
0.604552428361562	4.63688754723267	1.14856398984075	0.285919723356399	0.998879330486655	Med9
0.298837592920091	6.39940603895412	1.14745961824262	0.286150421678671	0.998879330486655	Mrpl15
0.359558138063139	5.78565586258773	1.14722218516547	0.286200051516267	0.998879330486655	Zfand3
-0.240216218881638	7.01340533678279	1.14707208370487	0.286231432406015	0.998879330486655	Mrpl55
-0.242148507663526	6.97333278072153	1.14563125001899	0.286532883869181	0.998879330486655	Atp5g2
0.395917943820531	5.57017422670819	1.14439510966437	0.286791833512741	0.998879330486655	Msantd4
0.189951461780498	7.73177271081238	1.14450143242029	0.287067558506765	0.998879330486655	Psmb7
-0.343826095364917	5.93144270825687	1.14271619783179	0.287144016341668	0.998879330486655	Setd3
-0.194732563591581	7.6081944493728	1.14234740044048	0.287221452650965	0.998879330486655	Rpl23a
0.407607418701874	5.6276130225208	1.14550849626194	0.288405898928725	0.998879330486655	Laptm4b
0.198971698569787	7.49929216307887	1.13212973476381	0.289377545136531	0.998879330486655	Acyp2
0.379813701242118	5.63606812065592	1.12941430478969	0.289954036801884	0.998879330486655	Cenpa
-0.46813451973676	5.12754046830783	1.11808317299421	0.292375662454385	0.998879330486655	Fdft1
0.597378011125493	4.64012420704258	1.11697894762184	0.292613041364301	0.998879330486655	Rorc
0.597378011125493	4.64012420704258	1.11697894762184	0.292613041364301	0.998879330486655	Anxa4
-0.624235670710378	4.5722479632512	1.11648757804238	0.292728511980294	0.998879330486655	Dcaf6
-0.458930791481186	5.17981701160891	1.11436323497261	0.29317634142581	0.998879330486655	Midn
-0.236124534278965	7.01203496297952	1.11359830216091	0.293341335697321	0.998879330486655	Gm44386
-0.103717591149251	10.0924030587762	1.11069792828031	0.293968028744094	0.998879330486655	Idh2
-0.315454461708303	6.1445450838297	1.10998357109031	0.294122647230296	0.998879330486655	Map2k2
0.348062522199577	5.84196882936931	1.10979605443007	0.294163251517	0.998879330486655	Rps12
-0.317447042104129	6.11885455714649	1.10967961950108	0.294188467622709	0.998879330486655	Snrpn
-0.255469015365552	6.761207159074	1.10787374222598	0.294579920716847	0.998879330486655	Timp3
0.496949615133641	4.97407734983557	1.10460523406814	0.295290134644282	0.998879330486655	Unc50
0.277500969440851	6.52794138711031	1.10437783940136	0.295339627471121	0.998879330486655	Rpl27
-0.456751557623367	5.17699383485251	1.10177321638049	0.295907293389827	0.998879330486655	Ulk2
0.143250903103222	8.5946907741547	1.09833366434921	0.296659091782482	0.998879330486655	Rps12-ps3
0.520081384257659	4.92181350709411	1.09822965896157	0.296826714585925	0.998879330486655	Naxd
-0.591672487704408	4.64407306353446	1.09314290057717	0.297798346695678	0.998879330486655	Blvrb
-0.481736987965983	5.07590637202724	1.08911043196189	0.299169084340268	0.998879330486655	Dcakd
0.419756132223961	5.3984447773208	1.08592882711946	0.299391102950969	0.998879330486655	Ube2i
-0.347265646191619	5.80221279634788	1.0835501363863	0.299918702545928	0.998879330486655	Vamp2
0.229548790965372	7.04476854972479	1.0823638914648	0.300182265671786	0.998879330486655	Rtraf
0.444333188803443	5.24212460631141	1.08156962993293	0.300358904970996	0.998879330486655	Cbr2
0.564164216950931	4.70440950956513	1.08118702279716	0.300444042821365	0.998879330486655	Steap4
0.44172605020053	5.24285423265209	1.0799140331978	0.300727534578383	0.998879330486655	Ier3
0.135521130434674	8.74970550173552	1.07863544799085	0.301012622387993	0.998879330486655	Ndufb3
-0.433467154052489	5.27102161022702	1.0782985997843	0.301087788316848	0.998879330486655	Rapgef1
0.416994096133667	5.39903753781062	1.0779151311432	0.301173387049063	0.998879330486655	Aph1a
-0.345105459311837	5.80156798382329	1.07575300239219	0.301656614801875	0.998879330486655	Rdx
0.307889469479419	6.2227467780956	1.07531681764904	0.301754222653049	0.998879330486655	Gtf2i
0.443393946401115	5.24164462785683	1.07461905958618	0.301910449869451	0.998879330486655	Dnajc4
0.443393946401115	5.24164462785683	1.07461905958618	0.301910449869451	0.998879330486655	Alad
-0.332454736253672	5.92462950085374	1.07461513491921	0.301911328895311	0.998879330486655	Mien1
0.561801310049874	4.70547729672578	1.07269520749883	0.302341743463755	0.998879330486655	Pcif1
-0.34554993712889	5.80135869678663	1.07099570612968	0.302723408803585	0.998879330486655	Rnf128
-0.61306238125659	4.56679508144612	1.06955426695113	0.303088772089765	0.998879330486655	Chmp7
-0.303691749847065	6.24110648305347	1.06879675772968	0.303218168799752	0.998879330486655	Stub1
0.477340485757161	5.02497938245768	1.06846243117372	0.303293483962977	0.998879330486655	Mosmo
-0.340078505987908	5.83235357147579	1.06762464374047	0.303482322973203	0.998879330486655	Kpnb1
-0.242315136780383	6.89761643000262	1.06756487928416	0.303512993263756	0.998879330486655	Iscu
0.441021682721086	5.24249416998815	1.06728598066546	0.303558701802259	0.998879330486655	Armc1
-0.36229515373611	5.70665435058686	1.06703850367075	0.303657212043775	0.998879330486655	Mapre1
0.477094098410437	5.0248537634118	1.06463750118286	0.304156879379886	0.998879330486655	Slc35a4
0.298325479738892	6.28787704020028	1.06434524369736	0.304222981873603	0.998879330486655	Zfand6
0.396679051045523	5.47353233781266	1.06175979782134	0.304808572090784	0.998879330486655	Gm14760
0.435773317592112	5.24600498821063	1.05875182236121	0.305491715278208	0.998879330486655	Lifr
-0.251935166437566	6.74338273075994	1.05851182059276	0.30554630828376	0.998879330486655	Gm4459
-0.432451262349794	5.27150014069886	1.05814375604459	0.305630056374466	0.998879330486655	Cnot8
-0.429194596533853	5.31962173898524	1.05783857726057	0.305757980017905	0.998879330486655	Polb
-0.438925992027206	5.22267016583156	1.05753311852518	0.305769064778664	0.998879330486655	Rnpepl1
-0.538535567745192	4.77518968531232	1.05482411631876	0.306386751628943	0.998879330486655	Nbeal1
0.285332658521344	6.38608359878983	1.05399910752101	0.306575187914758	0.998879330486655	Txnl1
-0.361519087314071	5.70361577149173	1.05438079100158	0.306630042339573	0.998879330486655	Tsfm
-0.175314931299249	8.05610536379076	1.06438486389724	0.306631255998453	0.998879330486655	Adprhl1
-0.227054646892843	7.02148954380377	1.05213038874444	0.307002573501556	0.998879330486655	Mtfr1l
0.481049810745845	5.02472176453515	1.05145495396786	0.307245156071381	0.998879330486655	Pla2g5
-0.535317258004641	4.77254326549186	1.05061363375869	0.30735003611011	0.998879330486655	Nsun4
0.244318969230302	6.86638099459029	1.05022070626689	0.307556135580568	0.998879330486655	Nceh1
0.240047484306387	6.89440422428851	1.04710902679978	0.308154851657838	0.998879330486655	Hnrnpab
0.557329582926824	4.70774759780844	1.04581012052223	0.308453839638635	0.998879330486655	Phf10
0.109322161270998	9.58676806456105	1.04446213932005	0.308764525742135	0.998879330486655	Ndufa11
-0.415070853456987	5.35878609898132	1.04299722234823	0.309102628508321	0.998879330486655	Supt4a
-0.356178002707182	5.70272547513925	1.03513129345247	0.310935822092175	0.998879330486655	Polr2j
0.445837789034863	5.20473986230294	1.03553899075757	0.310941575723199	0.998879330486655	Rbfox2
-0.0989463215296824	10.2086544071293	1.03486059604021	0.310989424629187	0.998879330486655	Hadhb
0.258014140360917	6.64627178277979	1.0348280508227	0.310997001819071	0.998879330486655	Prnp
-0.331274704541534	5.86113387076789	1.03186625988912	0.311687583453955	0.998879330486655	Lgmn
-0.206662470385187	7.25362196561415	1.03117997269358	0.311847888033617	0.998879330486655	Pttg1
-0.522496543653433	4.83862923569165	1.03093681813468	0.312045212753271	0.998879330486655	Dut
0.426619495664801	5.28582975620004	1.0300414054175	0.312114076354042	0.998879330486655	Pkp4
-0.516814545278564	4.83718368509343	1.028165390847	0.312553326187359	0.998879330486655	Itga6
0.533731110189563	4.76735343685198	1.02735881593989	0.312742427450004	0.998879330486655	Ezr
0.43054423258825	5.2474660723221	1.02490224631121	0.313319297713287	0.998879330486655	Fam234a
0.530880047203546	4.76814657863251	1.02487038018733	0.313326789954265	0.998879330486655	Mgmt
-0.21916720984463	7.09975993842813	1.02315594651292	0.313730228979056	0.998879330486655	Grb14
0.225623008369293	7.00026721783405	1.02267804584682	0.313842810040486	0.998879330486655	Itgb1bp2
-0.162430523355434	8.0444179811457	1.0223300602868	0.313924819935257	0.998879330486655	Rpl28-ps1
-0.405651083480225	5.40230947254705	1.02202906626386	0.313995778083642	0.998879330486655	Adgrl4
0.232562955829442	6.90989771016599	1.02184796050994	0.314038483228313	0.998879330486655	Map7d1
-0.278925926255198	6.45315552234945	1.02062222009436	0.31446752534786	0.998879330486655	Clasp1
-0.221501519326024	7.05959025264015	1.01903454195609	0.314702877617954	0.998879330486655	Perp
0.528804181866267	4.76933544043429	1.01885953515816	0.314744266998821	0.998879330486655	Phospho2
0.347668612167096	5.73584933822899	1.01861177988229	0.314802873779984	0.998879330486655	Rad23a
0.431310156981918	5.28414649659191	1.01735191879495	0.315509493847199	0.998879330486655	Snrk
0.155278931935155	8.20122596145993	1.01554593102786	0.315529295977527	0.998879330486655	Mgp
0.344519293273908	5.73607829872167	1.01494599116431	0.315671704335885	0.998879330486655	Azin1
-0.311469083769805	6.06069867370864	1.01494247336102	0.315672539610643	0.998879330486655	Mcur1
0.459941652666086	5.07414654538941	1.01447267927658	0.315784114734804	0.998879330486655	Pik3ip1
-0.494097317847354	4.89406438543522	1.01423476922102	0.315840637733664	0.998879330486655	Glrx2
-0.510377307852189	4.83403737155901	1.01363017696098	0.315984337694411	0.998879330486655	Stard10
0.388080281428797	5.47700206273747	1.01125199991196	0.316550422949519	0.998879330486655	Sdhaf1
0.466157077207687	5.03004042241411	1.01095618044468	0.316620931454558	0.998879330486655	Tmem167
0.457249553655466	5.07489923826886	1.00969797443689	0.31692105647306	0.998879330486655	Nae1
-0.242150305871326	7.45752875372675	1.04999312889874	0.317300468640697	0.998879330486655	Fuca2
-0.49197440543937	4.89302622042012	1.0080937068001	0.317304274464539	0.998879330486655	Ldhd
0.342821470732605	5.73705235142241	1.00746746702949	0.317454033137819	0.998879330486655	Pdf
-0.390336284289389	5.43859629350733	1.00604716361002	0.317794030306459	0.998879330486655	Farsb
0.454299581051522	5.07764878428522	1.00409979781732	0.318260980828867	0.998879330486655	Srp72
-0.114855090355561	9.27448986449046	1.00242654096361	0.318662929389757	0.998879330486655	Tuba4a
0.159476341126809	8.04530605972747	1.00199067278785	0.318767743636255	0.998879330486655	Grcc10
-0.489579653016587	4.89211758454405	1.00005924716975	0.319232747833149	0.998879330486655	Tmed3
-0.507476334005914	4.83128951545316	0.999384097975418	0.319395506623708	0.998879330486655	Lin7c
-0.316757856110724	5.94725306103377	0.998805158283001	0.319535159674092	0.998879330486655	Vcl
0.32777332837592	5.87573505819743	0.998327946257701	0.31965033460277	0.998879330486655	Fgf13
0.228619634328204	6.92434308367628	0.9979776805479	0.319734906101393	0.998879330486655	Amd1
0.373901965625424	5.54702495804869	0.996623928204407	0.320062047961952	0.998879330486655	Naa50
-0.308673736123108	6.03105121314295	0.996586057063014	0.320071206114956	0.998879330486655	March5
-0.505060804073038	4.83037299243601	0.990869947133423	0.321457494196532	0.998879330486655	Entr1
0.450381632848867	5.07778033637209	0.99066362023907	0.321507682090031	0.998879330486655	Depp1
-0.504231444183057	4.83076423959996	0.987105536847269	0.322374806203138	0.998879330486655	Ppt1
-0.504231444183057	4.83076423959996	0.987105536847269	0.322374806203138	0.998879330486655	Snrpg
0.330962804889111	5.84935580848645	0.986754695096866	0.322477016881764	0.998879330486655	Rcan1
0.336799619472939	5.76640080188917	0.985991536791279	0.3226469327598	0.998879330486655	Bzw1
0.410816568473748	5.3285753109816	0.985319603993497	0.322811219342706	0.998879330486655	Pfdn6
0.260368486591619	6.56639134174502	0.983935093837158	0.323150080966923	0.998879330486655	Rab14
0.1644319829053	7.89880184939309	0.983709273829557	0.323205395736945	0.998879330486655	Csde1
0.235642263407625	6.87018740180613	0.983622842599653	0.323338875691973	0.998879330486655	Mif
0.447175972824655	5.0804079140923	0.980970937464049	0.323877156966981	0.998879330486655	Grina
0.277884198827434	6.35304887118255	0.977857874640216	0.32464310479115	0.998879330486655	Kcnip2
-0.393540095150429	5.3951388999874	0.97762568551684	0.324700329992436	0.998879330486655	Cmpk1
-0.485615079064506	4.88991401811619	0.977175728772687	0.324811264348151	0.998879330486655	Cdk2ap2
-0.113586469691418	9.26180690997954	0.976792006051314	0.324905908977414	0.998879330486655	Ndufs7
0.22619489562103	6.92559588453907	0.976587108524229	0.324956461696146	0.998879330486655	Apbb1
0.490681623513597	4.97523219850156	0.981151583670224	0.325091889478759	0.998879330486655	Nt5c2
0.366821147803436	5.54919050680575	0.975420243705733	0.325244552830548	0.998879330486655	Dhrs11
-0.316567377927302	6.03357735103278	0.978011880766173	0.325403157905558	0.998879330486655	Nr4a1
0.338068269155327	5.76522414324527	0.973746763429596	0.325667448617053	0.998879330486655	Twsg1
-0.153177114886135	8.13060694589881	0.972644189946268	0.325931312284865	0.998879330486655	Pgk1
-0.410283556122911	5.30980235187529	0.972356543837891	0.326002582741967	0.998879330486655	Chchd4
-0.313251149872167	5.94571134757933	0.970594993128308	0.326439498507169	0.998879330486655	Snrpf
0.501634780907217	4.82942223684177	0.969748795923871	0.32664965795788	0.998879330486655	Trim28
-0.484794762560563	4.89030120229196	0.968977132465111	0.326841463919968	0.998879330486655	Col15a1
-0.385161605595263	5.43556805868283	0.968296942150838	0.327010657918813	0.998879330486655	Rpl10-ps1
0.216531596811392	7.05058498953811	0.968145831521338	0.327048261827862	0.998879330486655	Psme1
0.444716267082548	5.08128666484418	0.966334941731936	0.32749935192435	0.998879330486655	Pigyl
0.250752627151153	6.6339916283762	0.966190360159113	0.327535402824069	0.998879330486655	Tmem205
-0.296527525543756	6.13502536762166	0.965240120204014	0.327772473823379	0.998879330486655	Dtnbp1
0.299858255743505	6.07871577611967	0.964149992775969	0.328044727357119	0.998879330486655	Ctdsp1
0.277710423361687	6.33436137543286	0.964017923480797	0.328077731497028	0.998879330486655	Eif1ax
-0.454393331374659	5.00309414090313	0.960312489379348	0.329005533753986	0.998879330486655	Asf1a
-0.467485866549415	4.94738788792481	0.958280614530928	0.32951578550955	0.998879330486655	Pa2g4
-0.50078748053178	4.82828024591664	0.956967166132653	0.3298511436516	0.998879330486655	Plekhm2
0.313493705181696	5.95538903353501	0.950812784766507	0.331433983671132	0.998879330486655	Atp6v1d
-0.466201113236124	4.94597787539187	0.949022449656272	0.33185420619064	0.998879330486655	Wbp11
-0.348436262070859	5.62355540708569	0.948388492632461	0.332015144216228	0.998879330486655	Vmp1
0.36260443011966	5.55089584644848	0.947745168598774	0.332178567371065	0.998879330486655	Itgb5
-0.465389736281548	4.94636092960659	0.945212493792844	0.332822992427231	0.998879330486655	Sacm1l
0.370797938083793	5.51620838938556	0.944496598969512	0.333005452512035	0.998879330486655	Sri
-0.453322986120327	5.00360001695425	0.944491999865084	0.333006625120365	0.998879330486655	Echdc3
-0.359940033277546	5.55030742277627	0.944281502707961	0.333060300364975	0.998879330486655	Msl3
0.180483060018986	7.52518415213804	0.941965933937537	0.333651522430131	0.998879330486655	Tmem65
0.15657835038739	7.99136337469077	0.941089929789703	0.333875556148222	0.998879330486655	Gm15500
0.29638702689368	6.14579467332057	0.936984618559952	0.335052939104225	0.998879330486655	Agl
-0.34959923279151	5.62300603753841	0.935658326791571	0.335269193746285	0.998879330486655	Galnt1
-0.449704861362308	5.00131208676253	0.935601146838612	0.335283906602617	0.998879330486655	Grb10
0.327357707512011	5.77070408827654	0.934525944508632	0.33556072687202	0.998879330486655	Nudt19
-0.0972853308951731	9.95160251744169	0.930688994466962	0.336551100277905	0.998879330486655	Uqcrc1
-0.360888048706091	5.54986000707077	0.929937082345228	0.336745642055681	0.998879330486655	Klhl21
-0.252832223740836	6.58264673225977	0.928611613521623	0.337171557160159	0.998879330486655	Fopnl
0.491362546367757	4.83308884697038	0.925576108307521	0.337876955160689	0.998879330486655	Ppp1r12a
-0.154509570883737	8.06154571415666	0.924497278910646	0.338190843750267	0.998879330486655	Romo1
-0.199048980743178	7.20257414143049	0.918493994201502	0.339725158103847	0.998879330486655	Psmb3
0.339217406706338	5.71119428887219	0.917556873121964	0.34021804522873	0.998879330486655	Memo1
0.41474495392119	5.17415725901842	0.911487801995795	0.341567052420383	0.998879330486655	Cul2
-0.192037244200009	7.3487226516131	0.91160844981409	0.341667246478097	0.998879330486655	Prkaca
0.386661407710921	5.37327078993131	0.910832813583166	0.34173993775371	0.998879330486655	Abhd12
0.549423762566494	4.71055575474811	0.917014086189793	0.341769317476685	0.998879330486655	Prox1
0.469542414405484	4.88962075998718	0.910164736670152	0.341916400268634	0.998879330486655	Gpx8
0.0981544694926458	9.80373264824735	0.909936542535518	0.341976702689849	0.998879330486655	Acaa2
-0.419700389535872	5.16008863902292	0.908744026529768	0.342292071295802	0.998879330486655	Sumo3
-0.434157445006553	5.05289084325707	0.907741263249942	0.342557564521517	0.998879330486655	Ucp3
-0.414155606365616	5.15687204313946	0.906118754463612	0.342987735823185	0.998879330486655	Zfyve21
-0.376891271062646	5.43218511912046	0.904115703284202	0.343562683743222	0.998879330486655	Ubr2
0.182520033270531	7.42727064943127	0.903580659267619	0.343662128947516	0.998879330486655	Pfn1
0.284938853482376	6.15009680252947	0.903044859677736	0.343804726004743	0.998879330486655	Rpl27a
-0.446627304036656	4.99877331372181	0.901237175821059	0.344293846231459	0.998879330486655	Col1a1
-0.446627304036656	4.99877331372181	0.901237175821059	0.344293846231459	0.998879330486655	Slc47a1
0.312725573498778	5.83079843658802	0.900570874005911	0.344464195404498	0.998879330486655	Mrps36-ps1
0.297182499505422	5.98789874330826	0.897530006428197	0.34527713691245	0.998879330486655	Lrrc14b
0.246316264554825	6.55756021136695	0.896356143951426	0.345591655511156	0.998879330486655	Psmc2
0.374600988363303	5.41438151162722	0.896280530086515	0.345611928490469	0.998879330486655	Cdk4
-0.420584322230802	5.1042625212596	0.8962761557052	0.345613101363929	0.998879330486655	Ryk
-0.210548051943527	7.02766878084852	0.894683181066974	0.346040576267524	0.998879330486655	Npm1
-1.71274258802548	5.29106414910991	1.38228681521582	0.346069404660211	0.998879330486655	Smarca2
-0.423405315052507	5.10488919234466	0.894250507681776	0.346156808806864	0.998879330486655	Smco4
0.295667010151162	6.05816728571859	0.893605756902983	0.34636914438363	0.998879330486655	Timm44
0.290585946216719	6.14644041156619	0.894292071578263	0.346492770797155	0.998879330486655	Ddx6
0.409940262596906	5.17588068261901	0.892371943168422	0.346662081285969	0.998879330486655	Tmem208
-0.177273858193803	7.51693244264797	0.892241002559915	0.346697337568083	0.998879330486655	Mylk3
0.289411191159497	6.12546347674621	0.892014464543786	0.346800258515093	0.998879330486655	Kif5b
-0.311472951494608	5.81874764202694	0.887447078788849	0.347991501412188	0.998879330486655	G0s2
-0.350853812382262	5.5844624916896	0.887367785691856	0.348212974630154	0.998879330486655	Oxld1
-0.269377650626835	6.29485928112776	0.885020928534195	0.348648981553137	0.998879330486655	Aldh4a1
0.0871038565618226	10.5860164144723	0.878624422868045	0.350390592854712	0.998879330486655	Aldoa
-0.172391870124685	7.56181065207131	0.87835260545728	0.350464865976547	0.998879330486655	Rpl23a-ps3
-0.274078419365357	6.22474089579049	0.87757823128452	0.350676579364432	0.998879330486655	Gtf2h5
-0.165509390280951	7.67501280191443	0.877044236160404	0.350822675522749	0.998879330486655	Psmb4
0.282375486612658	6.13011664857335	0.875956575604281	0.35112050792131	0.998879330486655	Ssr4
0.447666464520511	4.94478810589753	0.873090623423866	0.351906951747087	0.998879330486655	Itpa
-0.396608636075091	5.25293489230267	0.873062979737595	0.35191454920811	0.998879330486655	Slc39a14
-0.305612337833304	5.84835574749924	0.872750056225754	0.352000567357367	0.998879330486655	Mbd3
-0.110245357841747	9.18444900106269	0.871997483703486	0.352207557013092	0.998879330486655	Oxct1
-0.397370392006926	5.25257383981116	0.87129014326708	0.352402258474679	0.998879330486655	Abce1
0.336715308068199	5.62323955441418	0.870997338521524	0.352482898775564	0.998879330486655	Fus
-0.40212585820337	5.20315955923841	0.868724644272542	0.353109677179394	0.998879330486655	Tpp2
-0.393150944355225	5.25074967412576	0.866627641828588	0.353689363366469	0.998879330486655	Mmp15
-0.39264308535114	5.25099025328326	0.865910110126306	0.353888015558541	0.998879330486655	Pabpc1
-0.20978010117016	6.96988864447971	0.865268421644277	0.354065800374209	0.998879330486655	Cdh2
0.445911380246538	4.94606984456908	0.865250691838577	0.354070714302168	0.998879330486655	Ccnd1
-0.134629606280306	8.37858392880064	0.864469293847476	0.35428737706435	0.998879330486655	Lgals1
0.532512964009581	4.60332088604727	0.864310705812292	0.354331371990081	0.998879330486655	Wdr45
0.360705687556362	5.45299613975783	0.86140098393012	0.355139915090573	0.998879330486655	Itga7
-0.267134446257212	6.29447782042722	0.861028512972764	0.35524359962395	0.998879330486655	Mrpl2
0.36430972485813	5.45286925306455	0.860440116060288	0.355407476458139	0.998879330486655	Nabp1
0.307967001664993	5.83375533140955	0.858403041787398	0.355975636880687	0.998879330486655	Rpsa-ps10
-0.290585100722095	6.02243079527451	0.857254673793034	0.356296481045098	0.998879330486655	Bckdk
-0.110406505917784	9.10930795838721	0.855617466995176	0.356754593695784	0.998879330486655	Ndufs3
0.393754103855181	5.22242084552307	0.853518915013966	0.357342988352797	0.998879330486655	Prelid1
-0.262504681168893	6.31485874704478	0.852537274444901	0.357618682713562	0.998879330486655	Gm49594
0.185812992688437	7.2920055562354	0.851973198643595	0.357777236888043	0.998879330486655	Ss18l2
-0.170291965862288	7.54154694251698	0.849761120990764	0.358399962126151	0.998879330486655	Rpl27-ps3
0.438571468313488	5.08242203667309	0.853958997178139	0.358645314294819	0.998879330486655	Gpbp1l1
0.263413647823326	6.30164136667563	0.848527843929296	0.358747795496429	0.998879330486655	Psmc1
0.31926573698733	5.71743851880452	0.84821612063619	0.358835787941079	0.998879330486655	Aimp1
-0.174935017808684	7.45516181426219	0.847973167947152	0.358904388733348	0.998879330486655	Psmb6
0.357755021255746	5.45542446239021	0.847778424099666	0.358959390265504	0.998879330486655	Akirin2
0.401985157008317	5.18018455930804	0.846789231198511	0.359238948587896	0.998879330486655	Ufd1
-0.342406853475231	5.58141510970278	0.847189849753377	0.359252719050392	0.998879330486655	Slc25a33
0.299833887911467	5.8867771430312	0.846588387659924	0.359295746344147	0.998879330486655	Atp6v1b2
0.29758617998373	5.88915815951545	0.845897328671301	0.359491270224454	0.998879330486655	Tmed7
0.392805967798858	5.22193808978708	0.844697757547822	0.359831019823339	0.998879330486655	Ankrd9
0.391374601323657	5.22327509624494	0.844590504053528	0.359861418475797	0.998879330486655	Tuba1c
-0.137893167582375	8.24889010476028	0.842430943743775	0.360474257455777	0.998879330486655	Scp2
-0.379532712361194	5.29377035349977	0.841342369127642	0.36078372187433	0.998879330486655	Eif3d
-0.151278526364815	7.91347227196454	0.841217352518048	0.360819285718007	0.998879330486655	Txlnb
0.394702480997885	5.22290366188924	0.840481597751277	0.361028686727685	0.998879330486655	Tcea1
0.355044263418665	5.45600940786312	0.840006002117664	0.361164134445836	0.998879330486655	Lpgat1
-0.308717729703991	5.78432473027048	0.835775975825566	0.36237194264838	0.998879330486655	Ubl7
0.218844392952997	6.81014601847023	0.835549333706765	0.362436814706733	0.998879330486655	Ppp2r1a
0.263196921162489	6.30309662744404	0.834913260305954	0.362618965141359	0.998879330486655	Actr3
0.389230504845459	5.22425032046857	0.833832949909789	0.362928622489222	0.998879330486655	Nrbp1
-0.429351923354347	14.5756579805675	1.31231907624165	0.363340266398624	0.998879330486655	Gm28437
0.425729026245338	4.9988634137758	0.831408624149426	0.363624866569099	0.998879330486655	Pxmp4
0.438119411652358	4.94864027263601	0.828217600975505	0.364544139827148	0.998879330486655	Hmgcs1
-0.0878251323782324	10.2116790353278	0.826950518997078	0.364910061271564	0.998879330486655	Uqcrfs1
-0.383002216466238	5.24601326930683	0.824477452097293	0.365625738259755	0.998879330486655	Tmem60
-0.253827781059378	6.42110041118466	0.824782288483644	0.365769045816165	0.998879330486655	Lnpep
0.313136794978668	5.7198373755465	0.822946019597567	0.36606990035979	0.998879330486655	Lclat1
0.502954462707463	4.66948104467258	0.822492869927478	0.366201472140657	0.998879330486655	Naa30
-0.0818692206092759	10.8005484663777	0.818902351178201	0.367246319125427	0.998879330486655	Atp5c1
-0.337784812729586	5.61985713818124	0.821651220461083	0.367283241211894	0.998879330486655	Cd9
0.30878081487791	5.75006774459601	0.817912930511339	0.367534975244544	0.998879330486655	Cop1
-0.285429167192626	5.96207957867696	0.816400893855393	0.367976714762237	0.998879330486655	Vamp8
-0.279144494775264	6.04519150843702	0.816232742096801	0.36802588601951	0.998879330486655	Tax1bp1
0.421759540315355	5.00114945067061	0.815724118161666	0.368174674847077	0.998879330486655	Tigar
0.307517380179425	5.7512493760932	0.815363846823965	0.368280116779968	0.998879330486655	Ctsa
-0.37375266409708	5.33776352962355	0.815609505712918	0.368282627345813	0.998879330486655	Dnajb2
0.107536347663543	9.09795938801253	0.815072386745114	0.368365450439418	0.998879330486655	Rps4x
-0.395564048407283	5.2024130580527	0.815765127200666	0.368395050910124	0.998879330486655	St3gal3
-0.380789258564231	5.29317508839312	0.814864607708055	0.368542205562531	0.998879330486655	Arfrp1
0.231945144124193	6.59617254205725	0.814308699122447	0.368589174331513	0.998879330486655	Rpl38
0.212679014680896	6.83935566760944	0.812853888160007	0.36901589170195	0.998879330486655	Fxr1
0.224621477907341	6.70562174710311	0.812412832554008	0.369145396642038	0.998879330486655	Cct5
-0.227543361810987	6.64197764827039	0.811859860540535	0.369307853137714	0.998879330486655	Ssr3
0.418776179279075	5.00178746175129	0.808001762289195	0.37044411362529	0.998879330486655	Zfand1
0.272203272141112	6.15503935284132	0.807805988143093	0.370501902514475	0.998879330486655	Gstm5
0.379057167285791	5.26558414138645	0.807128450118229	0.370701996970922	0.998879330486655	G6pc3
0.308158444571223	5.74974995754143	0.806903613958702	0.370768430453541	0.998879330486655	Rps3a2
0.397638233551046	5.18215538317663	0.806086892231012	0.371193277535385	0.998879330486655	Usp25
-0.157222277121933	7.70359856595875	0.804971275875315	0.371340078992172	0.998879330486655	Mrfap1
-0.109525808668511	9.00735267009727	0.8031223630759	0.3718882090044	0.998879330486655	Gm7536
0.341344860277208	5.49516061778112	0.801795517162888	0.372282268853405	0.998879330486655	Rpl10
-0.109072446074992	9.05580499140861	0.7998113957447	0.372872631014747	0.998879330486655	Actn2
0.256972113795561	6.3045955075685	0.797216774951021	0.373646636201272	0.998879330486655	Ube2g1
-0.259595018361141	6.26652403957793	0.797110177312609	0.373678483944097	0.998879330486655	Hmgb1
-0.10958338996305	9.02059936384653	0.796660070582005	0.373813002738401	0.998879330486655	Map1lc3a
-0.277394241389302	6.01608133491867	0.796555831965695	0.37384416521143	0.998879330486655	Tmsb10
-0.491806030556197	4.67666040629708	0.796115113844126	0.373975959850303	0.998879330486655	Gna13
0.434589989583947	4.95120769975296	0.795718442532035	0.374195119123976	0.998879330486655	Klhdc3
0.164406294919832	7.54955053193987	0.794098204200236	0.374579944675525	0.998879330486655	Herpud1
0.416288619748107	5.00267848973188	0.793504417912991	0.374758022694556	0.998879330486655	Trabd2b
0.191286052890853	7.10820254431533	0.792515635703809	0.375054826519821	0.998879330486655	Calr
-0.140329802153757	8.07936539297188	0.791182893040563	0.375455403266033	0.998879330486655	Art3
0.40817807327305	5.05008386483301	0.791093688849861	0.375482236580715	0.998879330486655	Thra
-0.171452049128592	7.42284876140253	0.78854653738956	0.376249585535711	0.998879330486655	Samm50
0.20438963709124	6.90914308433597	0.788457963186738	0.376276309102332	0.998879330486655	Mtfp1
0.307184058364435	5.72417850132065	0.787697652661272	0.376505811609203	0.998879330486655	Mrpl44
0.406218469117593	5.05121530406661	0.786402174486315	0.376897313232544	0.998879330486655	Akirin1
0.404986346458825	5.05059043330458	0.786018767044553	0.377013291940146	0.998879330486655	1190007I07Rik
-0.354522137171833	5.37598691512113	0.785351252354674	0.377215332257032	0.998879330486655	Acad9
0.369885499988229	5.30764325628394	0.784649362964419	0.377427942482738	0.998879330486655	Abhd5
0.371748945767232	5.27004610553526	0.783544766967178	0.377762881264691	0.998879330486655	2210016F16Rik
0.297102289477245	5.78295279168736	0.783117844055166	0.377892446991767	0.998879330486655	Odc1
0.106811355337827	9.06937587321003	0.782446849274927	0.378096212872815	0.998879330486655	Sdhd
0.138691108652935	8.11296534790007	0.780232134222051	0.378769879189818	0.998879330486655	Ube2b
-0.346805302662872	5.417201764357	0.779934144152832	0.37886065106649	0.998879330486655	Cul5
-0.169639013969868	7.43115510987485	0.77812219090299	0.37941326265332	0.998879330486655	Art1
-0.470781614103628	4.74286319822861	0.777924993390375	0.379473473263555	0.998879330486655	Hnrnpul1
-0.2706823839515	6.14911309566342	0.778660902865507	0.37949799616901	0.998879330486655	Cops7a
-0.226771547000517	6.58656751816862	0.776882299585523	0.379792066377296	0.998879330486655	Aurkaip1
-0.21596862027708	6.72390598409634	0.776369053239279	0.379949027491983	0.998879330486655	Gpihbp1
-0.456901853939533	4.80804776394242	0.775620727480734	0.380186142404892	0.998879330486655	Hnrnpll
0.469673597539205	4.73548853220801	0.774684991325709	0.380464696181277	0.998879330486655	Adgre5
-0.345065193423415	5.45834899807142	0.774144533320402	0.380660626122518	0.998879330486655	Trappc1
-0.12683655785865	8.39048766295497	0.773818234622017	0.380730489887646	0.998879330486655	Rpl9-ps6
0.312705471866621	5.69371969903035	0.773545589215827	0.380935080720006	0.998879330486655	Ei24
-0.165112233906178	7.50071807970308	0.77287471248133	0.381020124521584	0.998879330486655	Gm15772
0.474593299757573	4.7334983412568	0.772879963740862	0.381027014212792	0.998879330486655	Rrbp1
-0.147552834185029	7.88031988448793	0.771759368253469	0.38136290850738	0.998879330486655	Coq10a
0.488769164925186	4.67592236143167	0.770700412514721	0.381688769057907	0.998879330486655	Rapgef5
0.194213946788625	7.08513949181065	0.770144267556218	0.381980701052902	0.998879330486655	Cfl1
-0.472695013416967	4.74406096995933	0.768743697700177	0.382412448340236	0.998879330486655	Nsmaf
0.220958266405621	6.64819782244038	0.767023503570656	0.382823310107764	0.998879330486655	Fhl1
0.263188871795614	6.18162764836203	0.765086232896396	0.38342300754036	0.998879330486655	Msn
-0.436510183448849	4.86626263953958	0.7645927829951	0.38357597321978	0.998879330486655	Cuedc2
0.332204411731959	5.52943976094335	0.763880784784843	0.383811289797386	0.998879330486655	Acbd6
0.123256146902707	8.51014188681187	0.762842749202198	0.384119173807707	0.998879330486655	Rpl23
0.216866238256211	6.73886973913262	0.761552674505296	0.384618407350608	0.998879330486655	Psmc6
-0.305451475758802	5.67695975038542	0.760856280206886	0.384737096187818	0.998879330486655	Foxred1
0.19139646511576	7.05117223324748	0.76005213664309	0.384987642041624	0.998879330486655	Psmb2
0.463192225603841	4.73894079669119	0.758109429099403	0.385593893119842	0.998879330486655	Itgb1bp1
-0.314335560180769	5.60609832708202	0.758051192340323	0.385612087874425	0.998879330486655	Pfdn2
-0.44960398698645	4.80317438890527	0.757904911131561	0.38565779554477	0.998879330486655	Med25
-0.245122857146692	6.39366258470445	0.757320857428506	0.385938165769471	0.998879330486655	Rgcc
-0.505988848889504	4.60325162892538	0.757311845064562	0.385962714888813	0.998879330486655	Hmgcs2
-0.432490419174581	4.86404560848252	0.754560864612443	0.386704812061229	0.998879330486655	Atg12
-0.260548669425965	6.14329951197784	0.754285099986249	0.386791335433583	0.998879330486655	Rpl10-ps6
0.358241748603147	5.31183639350917	0.753237506116052	0.387120279738466	0.998879330486655	Rbp7
0.191587768175092	7.02729215176935	0.752163825881117	0.387457831920707	0.998879330486655	Fdx1
-0.31476239297846	5.60765840868899	0.750960366068181	0.3878366877795	0.998879330486655	Fsd1l
-0.342509316195864	5.41555968366103	0.750558025683453	0.387963465455806	0.998879330486655	Tsn
-0.419419850485276	4.92340144456391	0.748998066209359	0.388455572994139	0.998879330486655	Znrf1
-0.422862126819526	4.92585539272887	0.748869730223365	0.388502823663181	0.998879330486655	Mkrn2
0.357536912764292	5.31350446003533	0.74812123870997	0.388732572534216	0.998879330486655	Aasdhppt
-0.299869988116869	5.7435607798803	0.747808894715168	0.388933924788842	0.998879330486655	Tmem259
-0.297881632729818	5.70855520019063	0.746815230440975	0.389145682015559	0.998879330486655	Fnta
0.386683662131507	5.10086164652664	0.746277925608036	0.389315822779925	0.998879330486655	Pcyox1
-0.262823334728859	6.09136482207797	0.746054885452885	0.389386481214286	0.998879330486655	Slk
0.394912824661713	5.05612756397189	0.745765622947767	0.389478146181717	0.998879330486655	Igf2r
0.359643161474128	5.31052402587341	0.743666691109332	0.390144212512841	0.998879330486655	Abcf1
-0.149092822692806	7.75064236603258	0.741363623007385	0.390876948646206	0.998879330486655	Swi5
-0.242417571812109	6.37185889645744	0.740563591907521	0.391131948150224	0.998879330486655	Eif4b
0.365135981420827	5.27282770584973	0.740285200442251	0.391220738091506	0.998879330486655	Med29
-0.207658072693535	6.77057314588337	0.740155312364799	0.391262174436026	0.998879330486655	Smim20
0.137723569347613	8.03767264115166	0.73874954395857	0.391711042231607	0.998879330486655	Selenop
-0.296106153692846	5.70767978469395	0.73827935528827	0.391861341366376	0.998879330486655	Ythdf3
-0.416213476462657	4.92288225031244	0.73631201412474	0.392491120125835	0.998879330486655	Dnajc5
0.258110947861621	6.13946643865751	0.736127244973369	0.392550342925762	0.998879330486655	Lypla1
-0.200481889703778	6.86152793177527	0.734806881821093	0.392973926180993	0.998879330486655	Psma7
-0.326999568392243	5.49367202102051	0.733921908092272	0.393258203022423	0.998879330486655	Tmem126b
-0.402984958387147	4.97871286371432	0.733179547121749	0.393496898403091	0.998879330486655	Tmbim1
0.458247693268017	4.74093513867828	0.73298499413268	0.393559488759973	0.998879330486655	Gm3646
0.284443574856055	5.81620524891267	0.732977555593694	0.393561882125647	0.998879330486655	Nfib
-0.147545690520682	7.79591905841539	0.732606045314785	0.393681443149505	0.998879330486655	Uqcc2
-0.422357006154169	4.92404935081084	0.732680176772834	0.39385965887217	0.998879330486655	Kpna2
0.26943483632495	5.97526250954348	0.731471343077977	0.394046943599836	0.998879330486655	Timp2
-0.339681009269787	5.41322529743772	0.7314294697392	0.394060440876067	0.998879330486655	Adipor2
-0.425242859099869	4.86130724398836	0.730815328036969	0.394258477687996	0.998879330486655	Gfm2
0.440255051362505	4.79889770705295	0.730233030274882	0.394446379247681	0.998879330486655	Tbrg1
0.383778158513208	5.10359878145793	0.729805596113071	0.394584390493177	0.998879330486655	Nomo1
-0.397233764192665	5.03552473520765	0.729590697378674	0.394723807380859	0.998879330486655	Aup1
0.345259970308956	5.35414582734978	0.728223679912312	0.395095773746793	0.998879330486655	Nutf2-ps1
0.28485178761299	5.81641361973206	0.727584241089147	0.395302756769813	0.998879330486655	Usp2
0.31773884961727	5.56744571663882	0.727158280264964	0.395440725374372	0.998879330486655	Ube2v1
0.230127860149907	6.47967039494081	0.726331751801964	0.39570863712944	0.998879330486655	Mrps15
-0.208186027512804	6.73745839817078	0.724885948654673	0.396177915114712	0.998879330486655	Psme4
-0.0780657619500262	10.6940075320057	0.72443689294866	0.396323833848047	0.998879330486655	Cycs
-0.399049834151559	4.9765393478077	0.72376237770707	0.3965431614422	0.998879330486655	Lgalsl
-0.411969219385635	4.92081622491903	0.723556270841307	0.396610215004404	0.998879330486655	Abhd16a
-0.219025586028326	6.60126177404811	0.722917380029573	0.396818172613597	0.998879330486655	Rtn2
-0.0772825903166529	10.7897704623581	0.722778607768936	0.396863363641066	0.998879330486655	Uqcr11
-0.247704279909047	6.26118329833512	0.722290420399366	0.397022400765363	0.998879330486655	Msrb3
-0.259655547643489	6.08978974105219	0.721944818995751	0.397135043587637	0.998879330486655	Mgrn1
-0.39878226186692	4.97666648780728	0.721677348391615	0.397222252925847	0.998879330486655	Arhgef7
-0.388898782389061	5.03146786367952	0.721657661730086	0.397228672902499	0.998879330486655	Chordc1
0.353563915607284	5.31553928069158	0.720370432539224	0.397648776354057	0.998879330486655	Hdhd2
-0.423923940303119	4.85987621292649	0.719640442575749	0.397887305080858	0.998879330486655	Eif5b
-0.239930299996444	6.32613528706078	0.718604908717863	0.398226029605541	0.998879330486655	Rpl28
-0.211916981267938	6.70410127302622	0.717421147228168	0.398613754233306	0.998879330486655	Ifitm3
0.346643035188903	5.35484922876003	0.717162201203097	0.3986986417113	0.998879330486655	Asna1
-0.273540253012061	5.89478462318037	0.716802647383971	0.398816554045081	0.998879330486655	Cyhr1
-0.39721826440898	4.9753896420691	0.715912098885049	0.399108820085668	0.998879330486655	Cox11
0.262227190792107	6.02546377381288	0.715579156575504	0.399218167468643	0.998879330486655	Matr3
-0.384173519515836	5.08634486306575	0.713830200013608	0.399822192455588	0.998879330486655	Ube2j1
0.280528013035995	5.81780236254511	0.712777127130873	0.400140164799963	0.998879330486655	D17Wsu92e
0.31266874473156	5.57060587607207	0.712711173340411	0.400161904068628	0.998879330486655	Ccnd3
0.340257880325579	5.39090431938561	0.712142201220987	0.400349516669738	0.998879330486655	Ykt6
-0.234642580968285	6.39022076275575	0.71197371408144	0.400405098191499	0.998879330486655	Cct3
0.37744904240767	5.10460430595431	0.711661089324379	0.400508258533657	0.998879330486655	Trmt5
0.37227264733578	5.14855783266331	0.711341587342515	0.400613728350828	0.998879330486655	Vps26a
-0.283600074011089	5.77132672848647	0.711009632639128	0.400723351882932	0.998879330486655	Atp5l2-ps
-0.389921375452847	5.03298529002738	0.710288863739545	0.400961526984865	0.998879330486655	Nploc4
-0.409083532604661	4.91810984215182	0.710138477039622	0.401011247734483	0.998879330486655	Ssr1
-0.195259088830594	6.91889411167729	0.708825295915502	0.40144579405361	0.998879330486655	Psma2
0.277697775148339	5.87181425924873	0.7083387468823	0.401635750446652	0.998879330486655	Chrm2
-0.0745713590895004	11.0945437607322	0.706642780040251	0.402169538139412	0.998879330486655	Ckmt2
-0.411428094697421	4.92107317918716	0.706462432396311	0.402243264637	0.998879330486655	Ube2d-ps
-0.216498057573471	6.61981125652803	0.706235344967382	0.402312546183975	0.998879330486655	Mrpl3
-0.227271872054792	6.44875746823271	0.705584650985088	0.402521111923155	0.998879330486655	Rab11b
-0.0803349928799303	10.349294280482	0.705321212054245	0.402608712078804	0.998879330486655	Uqcrb
0.224995095902393	6.49902653433297	0.705317069730913	0.402610089729835	0.998879330486655	Hist1h1c
-0.21581795216924	6.60037045313488	0.704311759002767	0.402944639620922	0.998879330486655	Tmem160
0.262500223232729	6.00151485141653	0.704137756850254	0.403002585858226	0.998879330486655	Nol7
-0.0760918822479414	10.7672667710207	0.704118129683613	0.403009122868322	0.998879330486655	Gm12338
-0.38263305408066	5.08509064613474	0.703700830663105	0.403247344009761	0.998879330486655	Map4k4
0.252462603751143	6.14313790478552	0.703176153764098	0.403323039527347	0.998879330486655	Rnf14
0.304606808973739	5.60485622701648	0.702938992040906	0.403402130964577	0.998879330486655	Tfam
-0.295851836196915	5.67112263882279	0.701890897995186	0.40375193403744	0.998879330486655	Rcn2
-0.310736510151244	5.56541334094219	0.701725679869176	0.403807116449742	0.998879330486655	Abracl
-0.258643330331249	6.09026947157938	0.701369005265335	0.403994762015931	0.998879330486655	Ptov1
-0.229679022728009	6.4083761806218	0.700449949310424	0.404233579962247	0.998879330486655	Akt2
0.128645318027809	8.29473927094867	0.701644286344663	0.404502327972112	0.998879330486655	Ank1
0.150310916676828	7.61292655582566	0.698353788600307	0.404935742106665	0.998879330486655	Arf1
-0.233400858617353	6.36632419361282	0.697334348610046	0.405277877207957	0.998879330486655	Cd59a
0.261125086555268	6.00252088990067	0.697303868618184	0.405288113164832	0.998879330486655	Mrpl58
0.247825741268823	6.18650369978919	0.697032203550476	0.405379362001364	0.998879330486655	Chmp2a
0.373481063854147	5.14916985992174	0.697174454012901	0.405565924904873	0.998879330486655	Mtdh
0.366758032114421	5.15201126543708	0.695800494776163	0.405793456551556	0.998879330486655	Sun2
-0.176377146706896	7.17761696455347	0.695443649783995	0.405913542368787	0.998879330486655	Rhob
-0.150183291501896	7.61435766539038	0.694767571082267	0.406141200455737	0.998879330486655	Rhoa
0.221329950559793	6.50151548148096	0.694326083478333	0.406289965396587	0.998879330486655	Mef2a
0.373308679281682	5.10672510025905	0.691836781582147	0.407130271548108	0.998879330486655	Tbca
-0.146083512489193	7.70802179958124	0.691692368035072	0.407179099358662	0.998879330486655	Ephx2
0.363144167704649	5.15226456400006	0.691564661044582	0.407222285690525	0.998879330486655	Clcn4
-0.277324328167204	5.80063560297599	0.691475300374002	0.407252508565199	0.998879330486655	Rex1bd
-0.365453586891315	5.13266338907624	0.691101900317409	0.407378832828094	0.998879330486655	Phldb1
0.14079980114866	7.8136620037919	0.690268501304012	0.407660986932888	0.998879330486655	Gm10076
0.413926738343603	4.85980871389914	0.687635726110586	0.408554231287968	0.998879330486655	Rnf6
0.413926738343603	4.85980871389914	0.687635726110586	0.408554231287968	0.998879330486655	Gpat4
0.183411874713306	7.01823807673711	0.683552646114428	0.40994526222184	0.998879330486655	Psma1
-0.074456459161781	10.9372437920305	0.683264172994012	0.410043804525314	0.998879330486655	Atp5j2
0.338097536651362	5.35652447669662	0.683030915393285	0.410123510862719	0.998879330486655	Dmd
-0.155461531429724	7.50529889472072	0.682029533283434	0.410465953333676	0.998879330486655	Gm13370
-0.272317482893134	5.83215483043466	0.680026270785851	0.411152280739681	0.998879330486655	Adhfe1
-0.366231023482349	5.13229345466927	0.679326232783294	0.411392518124421	0.998879330486655	Dctn4
0.183106231447943	7.00648921473747	0.678254630331176	0.411760671461971	0.998879330486655	Lrrc39
0.2175109694373	6.5197522824171	0.678223614838647	0.411771334234156	0.998879330486655	Ppib
-0.368966543155548	5.07969087051118	0.677814186278526	0.411912129499945	0.998879330486655	Exoc3
0.288514475950177	5.67199027730927	0.675879277212007	0.412578478220537	0.998879330486655	Cdk16
0.359052742080395	5.15436472335881	0.67521514440736	0.412807562884064	0.998879330486655	Gm12254
0.409100379639559	4.86176275909979	0.672673462541641	0.413686033786888	0.998879330486655	Gpd1
0.354381137449174	5.19638660629502	0.671129805520075	0.414220919108929	0.998879330486655	Fbln2
-0.206034260232681	6.64913904371185	0.67086491716998	0.41431280777181	0.998879330486655	Srp14
-0.359080633326522	5.12980438634936	0.670239463996719	0.414529895325284	0.998879330486655	Cpeb3
0.408587321541035	4.86150320149634	0.668421927431802	0.415161703565899	0.998879330486655	Atp6v0a1
0.242660576524202	6.18870546968842	0.666767799754821	0.415737956217226	0.998879330486655	Grb2
-0.130126239094816	8.04699257961018	0.666105388589706	0.415969056618039	0.998879330486655	Hspa5
0.351765049829083	5.19712275423934	0.663760483160884	0.416788684108135	0.998879330486655	Uap1
-0.122662650907884	8.23498313174518	0.662964961683561	0.417067295023569	0.998879330486655	Rpl36
-0.194871455985595	6.79669532851606	0.662783786818722	0.417130785762169	0.998879330486655	Ptp4a2
0.200746282634293	6.74793878147393	0.662256695290007	0.417315581362514	0.998879330486655	Gpx1
0.351061894852691	5.19882918574168	0.660669665037464	0.417872725804056	0.998879330486655	Myl9
-0.295062046998156	5.63582120192496	0.6606912183451	0.417975900428526	0.998879330486655	Snrpc
0.280431510280734	5.70493213135841	0.659056516264902	0.418440180687116	0.998879330486655	Mgea5
-0.231253013184079	6.34252506199887	0.65764637608607	0.418950458468129	0.998879330486655	1810037I17Rik
-0.189474145672309	6.8723256448337	0.657338351551513	0.419045846738669	0.998879330486655	Tmem70
-0.245594481234431	6.10916459800278	0.65681732202644	0.419229773151703	0.998879330486655	Csnk2b
-0.0687508897993309	12.4062529753226	0.655756021489047	0.41960479285076	0.998879330486655	Pln
0.124789088134106	8.170370472741	0.655162573189117	0.419814712277501	0.998879330486655	Rpl34-ps1
0.270404157336545	5.84962244934196	0.654653844246998	0.420097438788075	0.998879330486655	Psmb10
0.393521720462653	4.91572307481055	0.653057350404544	0.420560661562557	0.998879330486655	Cnep1r1
-0.10695851861876	8.71610521439191	0.652801524194102	0.420651444738513	0.998879330486655	Etfdh
0.184664468844568	6.9314035176696	0.651660595095641	0.421056676531179	0.998879330486655	Nebl
-0.0858625708514106	9.69465176068095	0.651317050267135	0.421206258714971	0.998879330486655	Crip2
0.296965734721155	5.60855729535666	0.650959436668166	0.421371661978067	0.998879330486655	Snx17
0.391265960883057	4.91675405695729	0.649656993026072	0.421769731338329	0.998879330486655	Zfp36l1
0.317624841563944	5.43498191235884	0.649171678065928	0.421942721589659	0.998879330486655	Atp6v1c1
-0.333831386068559	5.31893996841711	0.646902321643403	0.422753051499258	0.998879330486655	Fstl1
0.389261991138746	4.91791375646763	0.64620131159991	0.423003838375099	0.998879330486655	Ccdc85b
-0.240142713711875	6.15799189180662	0.645243938823385	0.423346701589178	0.998879330486655	Ifi27l2a
0.227751504332536	6.33626610110788	0.644691709967194	0.423544661489812	0.998879330486655	Ppia
0.389008072494053	4.91778541257933	0.644166127481055	0.423733199049611	0.998879330486655	Rwdd4a
0.32334675750156	5.39819496941722	0.644137621527902	0.423750726462715	0.998879330486655	Wdr45b
-0.156378444510998	7.48353425071842	0.645473719265447	0.4239158186323	0.998879330486655	Hint2
-0.134878332287687	7.86723923663244	0.642878979245877	0.42419546151571	0.998879330486655	Phb
-0.140977750055217	7.71247126267465	0.641338099992017	0.424749850125557	0.998879330486655	BC002163
-0.216391865563152	6.46497459641668	0.639183726413102	0.425526803410158	0.998879330486655	Hspa4
0.312864865195996	5.43847001552634	0.63753233545	0.426123817284535	0.998879330486655	Snrnp27
-0.203968393002171	6.61179584079038	0.63652376193247	0.426489062482256	0.998879330486655	Mmadhc
0.0898644385402924	9.37879025019526	0.636103541525328	0.426641381203582	0.998879330486655	Ndufv3
0.161990453266903	7.26155112834682	0.635429208671047	0.426885981234667	0.998879330486655	Gpc1
0.134206850167303	7.83080473382708	0.63531420206074	0.426927718670194	0.998879330486655	Gpi1
0.34295929540312	5.20091840169659	0.632635914380794	0.427901457682564	0.998879330486655	Atf4
0.240559902259626	6.10348348199667	0.630778692416553	0.428578663965794	0.998879330486655	Nptn
0.341531423636308	5.20226251035619	0.630608341434418	0.428640861215712	0.998879330486655	Nono
0.252723183522001	5.93272087712561	0.629674850892407	0.428981933805026	0.998879330486655	Ndufaf1
-0.326695411719832	5.31665553301675	0.629624815128747	0.429000227187342	0.998879330486655	Alkbh5
-0.36154124704803	5.07530897216342	0.629314453213146	0.429178131924131	0.998879330486655	Erlec1
-0.325977972922428	5.31510450821083	0.629045017692369	0.4292122912146	0.998879330486655	Por
0.384485907337248	4.91984924376206	0.627399808342261	0.429814904223715	0.998879330486655	Cetn3
0.335358400249967	5.24355384078464	0.626347185275932	0.430201138376729	0.998879330486655	Capn2
-0.141558364167234	7.62736025469002	0.626117430288672	0.430285511582243	0.998879330486655	Macrod1
0.175173404118465	7.04750018879802	0.625299364730822	0.430586135542404	0.998879330486655	Mfn1
0.250874186997206	5.95881512042553	0.624017256204058	0.431057931005664	0.998879330486655	Qdpr
0.13098033375274	7.89446791543613	0.622162982667928	0.431741669842478	0.998879330486655	Gm10132
-0.093038538615401	9.18694273134374	0.621977328305242	0.431810218558123	0.998879330486655	Gm14539
-0.217168687535433	6.42299123134151	0.621579486443927	0.431957168715711	0.998879330486655	Rab21
-0.0938035955102767	9.16085925858481	0.619764100968883	0.432645806672314	0.998879330486655	Minos1
-0.374850018727762	5.02614662719567	0.6213591975342	0.432735581315495	0.998879330486655	H2-Ab1
0.371427724859626	4.97187532678107	0.618047469956604	0.433265140130599	0.998879330486655	Mydgf
-0.240907531044839	6.079188337125	0.617627883525518	0.433420923091068	0.998879330486655	Gas6
0.103079423427724	8.74251757733453	0.614535838967526	0.434571578272953	0.998879330486655	Eci1
0.258184351868169	6.02509158820246	0.618162152437648	0.434581712980426	0.998879330486655	2010111I01Rik
-0.118784565383506	8.21538224207197	0.614005486264785	0.434769410735841	0.998879330486655	Immt
-0.295266412326893	5.51850738509063	0.612453633685429	0.43534907758975	0.998879330486655	Trappc4
0.26299218051476	5.7962469091422	0.61212029768848	0.435473743996224	0.998879330486655	Hdgf
-0.219520973560766	6.38196855265294	0.612012054494454	0.435514238327184	0.998879330486655	Fech
-0.227136152154537	6.22570483303377	0.604968959690788	0.438161586718396	0.998879330486655	Emc7
0.266279734307034	5.73930986723535	0.604762907183081	0.438239410003742	0.998879330486655	Mrpl37
0.324468190768061	5.28676066035355	0.602702197362294	0.439018886259717	0.998879330486655	Kctd9
-0.161368874541571	7.19525714902723	0.601136846714656	0.439612420270111	0.998879330486655	Apoe
0.221239391700417	6.30032121289073	0.599976963018182	0.440053012989089	0.998879330486655	Pja2
0.212516183373994	6.41756235680991	0.599900610194118	0.440082040257117	0.998879330486655	Gm2830
-0.312385895783175	5.35560332032173	0.599629520050927	0.440185125267741	0.998879330486655	Il6st
0.287274464837178	5.54814229407656	0.598362053923493	0.440667588834046	0.998879330486655	Zfp970
0.326876161467118	5.24743586223044	0.596332626872882	0.441441799717037	0.998879330486655	Elp5
-0.318141110638563	5.31127307994363	0.595384751955671	0.441804128468775	0.998879330486655	Ewsr1
0.221919591984724	6.28013707941892	0.594338744725707	0.442204503756441	0.998879330486655	Coq5
-0.198309328949146	6.6092970841018	0.593744896161969	0.442432058753754	0.998879330486655	Apoo
-0.21338386870526	6.42241279702307	0.593401702335447	0.442563648945572	0.998879330486655	Vti1b
0.364221071087273	4.97468627621773	0.592319930974936	0.44297882817112	0.998879330486655	Ipo13
0.268581296970623	5.74048131309617	0.592717392656951	0.442980570611965	0.998879330486655	Pecam1
-0.101772515261145	8.72948682817302	0.592251460612964	0.443005127140802	0.998879330486655	Laptm4a
0.163890014909844	7.16496911355848	0.5917557881837	0.443195583631259	0.998879330486655	Drap1
0.246557574760641	5.93479086568979	0.591674883271551	0.443226682491046	0.998879330486655	Snx5
-0.156548429365283	7.26285541210813	0.590577452350023	0.443648856519312	0.998879330486655	Yipf7
0.24140508284551	5.98726045193538	0.590216447000347	0.443787869321881	0.998879330486655	Stk39
0.154030158695456	7.29623272981754	0.590143262782703	0.443816058716288	0.998879330486655	Gm10359
-0.269220356918743	5.69549354510887	0.58994092474987	0.443894010587049	0.998879330486655	Mcfd2
0.36273641703849	4.97608992759274	0.589820760729938	0.443940314527133	0.998879330486655	Srp68
-0.163166351943158	7.15822308015338	0.589101269584775	0.444217720014161	0.998879330486655	Ablim1
-0.298681081826023	5.43675950929519	0.58905568701916	0.44423530381005	0.998879330486655	Celf2
0.285076317035668	5.54893876662561	0.588631276026248	0.444399075315573	0.998879330486655	Gm5940
0.36248504591314	4.97596281231084	0.588534900306472	0.444436277814872	0.998879330486655	Tbc1d16
0.325699878795137	5.24888791088193	0.588457928110739	0.444465993737572	0.998879330486655	Ptms
0.0926290254872254	9.03928784945972	0.586956525072518	0.445046245003399	0.998879330486655	Hsp90ab1
-0.293525195368926	5.47608909631439	0.58662433786646	0.445174785602579	0.998879330486655	Arl3
-0.196070173067576	6.62644470661344	0.5864327334959	0.445248953645798	0.998879330486655	Oaz2
0.215247321269549	6.48811729782342	0.588649202097156	0.445511302417064	0.998879330486655	Ier3ip1
0.239618515898957	6.0104687943226	0.584908625967686	0.445839605923228	0.998879330486655	Mrps12
0.638159161997466	15.2104444649994	0.85869167862886	0.445922128212994	0.998879330486655	Gm29216
-0.252484268842794	5.85324150892511	0.584658670581961	0.445936590131261	0.998879330486655	Uba3
-0.292567934196954	5.47654501610945	0.584458725331424	0.446014193785492	0.998879330486655	Furin
-0.285576340885324	5.59079891666903	0.584308754831591	0.446381628940577	0.998879330486655	Pdcd6
0.181008127932803	6.85202724590224	0.583028660182453	0.446569851757132	0.998879330486655	Bzw2
0.242204912848168	5.96128723112739	0.582908788286447	0.446616477556828	0.998879330486655	Gm16418
0.215772803511541	6.34215037866242	0.579226135708435	0.448052608593652	0.998879330486655	Maf1
0.216243931892334	6.32258000161052	0.57871279055389	0.448253371989625	0.998879330486655	Tmed4
0.257014194843253	5.77153865007407	0.577397816651577	0.448768285869031	0.998879330486655	Tubb5
0.138243446836184	7.60114964019506	0.577124358770686	0.44887548207251	0.998879330486655	Serbp1
0.225807815125929	6.19579531955286	0.576901984537421	0.448962682922192	0.998879330486655	Krtcap2
0.185346951248329	6.75422263027538	0.576572805930673	0.449091814290642	0.998879330486655	Arpc3
-0.271782504887567	5.62391264188591	0.574706487435896	0.449825042227827	0.998879330486655	Adrm1
0.117409086964923	8.13465756846844	0.574291246339475	0.449988434942466	0.998879330486655	Ctsb
0.239459813967977	5.98626966999506	0.573657132943048	0.450238131196755	0.998879330486655	Mrps18c
0.159223256165392	7.26120853741945	0.574434798349437	0.450475970987292	0.998879330486655	Nfe2l1
0.252077069234875	5.80147344867074	0.573044132922804	0.450479720379451	0.998879330486655	Cd47
0.235737587032552	6.01357241857704	0.572669556282962	0.45062744482061	0.998879330486655	Chp1
0.311699421366218	5.32926249697146	0.572224537065999	0.450803049109523	0.998879330486655	Acad12
0.117854667671681	8.14107710157478	0.571809612287722	0.450966875013057	0.998879330486655	Prdx3
-0.26536498378817	5.76314406662354	0.572598812822434	0.451282779062167	0.998879330486655	Araf
0.23671710960345	5.988289206083	0.569208958534284	0.451995833413013	0.998879330486655	Ank2
0.206463997564097	6.43884983130388	0.569090078214333	0.452042957102233	0.998879330486655	Atox1
-0.488465356812412	5.08253784441939	0.600420092109176	0.452262904215305	0.998879330486655	Pcmtd2
0.234345797554652	6.03642231981112	0.567985115118062	0.452481330400696	0.998879330486655	Gm19810
-0.257778096275713	5.72387275500297	0.567532269492645	0.452661181812556	0.998879330486655	Znhit1
0.27451756793663	5.58579319561598	0.567298905386679	0.452753908287283	0.998879330486655	Esam
-0.220319791768984	6.24540905867347	0.566806264502272	0.452949755870102	0.998879330486655	Fam213b
0.359490326693394	4.97660413019769	0.566456892431431	0.453095508337784	0.998879330486655	Smarca5
0.092060453095246	9.0217310907142	0.56546402139323	0.453484037897231	0.998879330486655	Rpl13a
-0.421211054477942	4.64235104627856	0.563303317105092	0.454346200902307	0.998879330486655	Dbndd2
-0.269729975258969	5.62312875040656	0.562977624347312	0.454476383103113	0.998879330486655	Plin2
0.3059410041811	5.3323556877145	0.56271781122144	0.454580274910246	0.998879330486655	Sh3bgrl3
-0.264311584263938	5.65690619455866	0.561251352718385	0.455167374071704	0.998879330486655	Gpr146
-0.272682405982091	5.58627762842129	0.560692802637646	0.455391305935101	0.998879330486655	Anxa11
0.313040955266611	5.29109245089122	0.560638676180996	0.45541301538003	0.998879330486655	Psmg2
0.0837719106535818	9.42415467473494	0.558884145895755	0.456123321100091	0.998879330486655	Tcap
-0.250472757987981	5.78863883330473	0.558849007750338	0.456131752611235	0.998879330486655	Tm9sf3
0.103607413482101	8.66209584297363	0.559545258614464	0.456439133018131	0.998879330486655	Rps15a
-0.252380782037486	5.75569215923034	0.557762429593297	0.456569003210956	0.998879330486655	Ap2s1
-0.0768611730990608	9.82575142548524	0.557709668615235	0.456590251698574	0.998879330486655	Acadm
0.272338431652889	5.58658328512843	0.557302801461039	0.456754162434998	0.998879330486655	Zfp652
0.254510069837736	5.77389475600256	0.55725083160975	0.456775105758625	0.998879330486655	Dcun1d5
0.210245529781968	6.38251224123912	0.557110765054753	0.456843643268594	0.998879330486655	Osbpl9
0.210725438866156	6.34263583746086	0.555897520703237	0.457321013066479	0.998879330486655	Metap2
0.403745858076282	4.70344181763575	0.555866248536615	0.457333640070138	0.998879330486655	Eif2d
-0.330842797838436	5.26828136705207	0.558605992923024	0.457546516267322	0.998879330486655	Sgms1
0.169419006108632	7.09337429436726	0.557825633813196	0.457621221575363	0.998879330486655	Sgcg
0.208108051663351	6.36380308855897	0.554898708795981	0.457724584662898	0.998879330486655	Tmbim4
0.15528250119518	7.21276999933635	0.553919413679566	0.458120819852217	0.998879330486655	Capza2
-0.191207002365986	6.58733971446265	0.553838349666513	0.458153643797833	0.998879330486655	Mrpl20
-0.172616101317261	6.90923264146925	0.551537774828841	0.459086739658929	0.998879330486655	Dhrs7c
-0.199587188084511	6.47509608677076	0.550662569807322	0.459442510385209	0.998879330486655	Eno1
0.235165923551509	6.01158787119637	0.55047061417944	0.459606831372497	0.998879330486655	Cops8
0.303165795605992	5.33295541182431	0.549968680468239	0.459724888432591	0.998879330486655	Ogt
0.196433811984968	6.51178029552631	0.549960494414195	0.459728221394507	0.998879330486655	Dcaf11
0.261507659708173	6.1593986582109	0.560628226351088	0.46008743432549	0.998879330486655	Gm34302
0.332752076540349	5.07824663658296	0.548724117375633	0.460232056272381	0.998879330486655	Slc31a1
-0.275185072716288	5.54885401564541	0.548272258215516	0.460416412657153	0.998879330486655	Cog6
0.301784817168356	5.33426214166454	0.54801931459704	0.460519663871344	0.998879330486655	Gm13292
0.341815529601718	5.0297571402597	0.547274004668253	0.460824113166992	0.998879330486655	Mlec
0.195439524262821	6.51271812204487	0.546870140132592	0.46098922071551	0.998879330486655	Gm10240
-0.196661706306602	6.49418898697758	0.546240725132964	0.461246725956299	0.998879330486655	Slain2
0.195408991990999	6.56222321315824	0.545470204902554	0.461623766078214	0.998879330486655	Tmem242
0.154559700802913	7.19153425238988	0.544741927312782	0.461860837482802	0.998879330486655	Tspan3
0.26248601587723	5.65321257673058	0.544008276298361	0.462161917316839	0.998879330486655	Adsl
0.296371648185155	5.37276367143833	0.54326839122889	0.46246587356128	0.998879330486655	Mtpn
-0.269475605951129	5.58425450111089	0.542675175694371	0.462709806799831	0.998879330486655	Rhot1
0.264292917633597	5.62164455895862	0.542614890617664	0.462734607856639	0.998879330486655	Arcn1
0.205087604517845	6.38440660062435	0.542401949149244	0.46282222822303	0.998879330486655	Bcat2
0.217196553824687	6.20101671322011	0.539549952272011	0.463998323931927	0.998879330486655	Msi2
-0.135496851405727	7.55115984847531	0.538823929887314	0.464298483586739	0.998879330486655	Tubb4b
0.294316854256257	5.37370797352137	0.5382728234729	0.464526535779262	0.998879330486655	Chmp2b
0.328889515269241	5.62493218318792	0.553476176715488	0.464821180708508	0.998879330486655	Myot
-0.258945266381625	5.68826068099387	0.53734490303253	0.46496973428234	0.998879330486655	Anp32e
-0.359708237065735	4.8951354661321	0.534698689778478	0.466009918601621	0.998879330486655	Cpped1
-0.230411979119386	5.96364098212704	0.534418306339554	0.46612660909274	0.998879330486655	Asnsd1
0.300038713828395	5.37263569580468	0.533181211970051	0.466842635977569	0.998879330486655	Axl
0.192962322260021	6.51434429533769	0.531390842049788	0.46738958814419	0.998879330486655	Cavin2
-0.145592245290817	7.31434436918728	0.531203460185637	0.467467940195484	0.998879330486655	Psmb5
-0.0850276434563345	9.20489685998308	0.531129234372341	0.467498982914669	0.998879330486655	Ndufa7
0.151060987483202	7.21499258096238	0.530880873849384	0.467602876435695	0.998879330486655	Gm10243
0.238255339960925	5.86052563762215	0.530444848591314	0.467785363515279	0.998879330486655	Fam220a.1
0.153751747801181	7.15964857487416	0.530331728182234	0.467832725910595	0.998879330486655	Vcp
-0.352626073861273	4.95436293471692	0.530459956135689	0.467863440825624	0.998879330486655	Slc29a1
0.298088254791647	5.33640535449027	0.528819165922583	0.468466765420872	0.998879330486655	Wdr18
-0.238096841615103	5.84679700091945	0.528539118744755	0.468584308564512	0.998879330486655	Mzt1
-0.239612098437259	5.84607387581257	0.528490206390603	0.468604843251187	0.998879330486655	Hmox2
0.172260063803296	6.82917024385431	0.528217903966991	0.468719189528725	0.998879330486655	Tcp1
-0.0716242239507608	10.0767624031977	0.528162756781985	0.468742352637874	0.998879330486655	Ndufa3
0.373651067119587	4.92527266314955	0.530041724280954	0.469231821688755	0.998879330486655	Smad4
0.094405525845893	8.77680757366951	0.526792789809848	0.469318365509903	0.998879330486655	Rps23-ps1
-0.34624324864641	4.95127573591792	0.526542009561434	0.469423931929048	0.998879330486655	Tnpo1
0.25358879727793	5.68579991763729	0.525432935045839	0.469891260132884	0.998879330486655	Sccpdh
-0.152287860906981	7.16638265173334	0.524984540979374	0.470080412821742	0.998879330486655	Mrpl18
0.227393473718311	6.0177970882216	0.523782996255245	0.470587886899107	0.998879330486655	Eif1b
0.260189705858721	5.62332184169821	0.523701902486659	0.47062216895238	0.998879330486655	Sys1
-0.344386285792285	4.95011954302933	0.521380764959101	0.471605140565305	0.998879330486655	Il11ra1
-0.336234780607811	5.0061808134721	0.521231111911491	0.471668631037793	0.998879330486655	Mettl22
0.260996404335293	5.68402872135919	0.522548501046611	0.471685393485125	0.998879330486655	Erh
0.160742192696936	7.01612238365252	0.520945709056309	0.471789752012355	0.998879330486655	0610012G03Rik
0.0852471356294301	9.14350422246227	0.520770525474548	0.471864122499893	0.998879330486655	Gm11808
-0.33570536910378	5.00643399050475	0.52074593199794	0.471874564665398	0.998879330486655	Ranbp9
-0.240280826849928	5.81653414001262	0.520628187458192	0.471924563123926	0.998879330486655	Ppm1k
0.317913541401668	5.12774932842676	0.518499489561304	0.472829970378158	0.998879330486655	Gm49477
-0.362764588991082	4.83184419828065	0.518156210773738	0.472976243050396	0.998879330486655	Scyl1
-0.204978443255884	6.3749191548018	0.518063085927522	0.473163901180704	0.998879330486655	Kcmf1
-0.086598749393592	9.05203437948199	0.516748072277906	0.473577029049275	0.998879330486655	Rps5
0.189581385048977	6.54777399582072	0.516020445077333	0.473887960484028	0.998879330486655	Slc35f5
-0.341460740706807	4.94947505879248	0.515738300788217	0.47400861661931	0.998879330486655	Plekhj1
-0.350858124278635	4.89111262785002	0.515501594162351	0.474109880446504	0.998879330486655	1700025G04Rik
0.374408028769911	4.76903859838952	0.514998203534199	0.474325349858382	0.998879330486655	Wdr83
-0.182638322117178	6.63883978424765	0.514285830319428	0.47463054453165	0.998879330486655	Paics
-0.325049854717162	5.05808789955201	0.511429959299095	0.475857281751582	0.998879330486655	Ets2
-0.339606968322407	4.9483195835654	0.511184216994287	0.475963082310739	0.998879330486655	Tnfaip1
0.281424971347414	5.4148265594916	0.510949192045498	0.476064304684374	0.998879330486655	Cenpx
0.281424971347414	5.4148265594916	0.510949192045498	0.476064304684374	0.998879330486655	Rps10-ps1
0.118602431671407	7.92060584783259	0.510297496990782	0.476345166122311	0.998879330486655	Rps29
-0.271041362198318	5.54545926785665	0.509285298317069	0.477035167108139	0.998879330486655	Lman1
0.389713007762226	4.70985275465293	0.508287519371592	0.477219485921924	0.998879330486655	Bace1
-0.316245517753831	5.10941179653657	0.505174285852256	0.478562610559066	0.998879330486655	Sik3
-0.316245517753831	5.10941179653657	0.505174285852256	0.478562610559066	0.998879330486655	Sec24d
0.0692452111301958	10.1420982253406	0.504663958446076	0.478784419740425	0.998879330486655	Gm10221
-0.0811431599979568	9.29739556355446	0.504212461257918	0.478980799821937	0.998879330486655	Ndrg2
-0.218825406695657	6.04143198696855	0.502875879301623	0.479562927447302	0.998879330486655	Smpdl3a
-0.351647979949563	4.89279590903356	0.502821317326086	0.479598102442725	0.998879330486655	Abhd4
0.144207376691993	7.28051429983752	0.502450410037395	0.479748478328602	0.998879330486655	Mtch2
-0.33880416729402	4.94870293211665	0.502293733348699	0.479816836185162	0.998879330486655	March8
-0.327918448383054	5.05872114002083	0.501472813826187	0.480369262436998	0.998879330486655	Pdcd5-ps
0.369785016604039	4.77115379555852	0.500964356644573	0.480397487807986	0.998879330486655	Ttc7b
0.191740973916785	6.46134973455771	0.499974775017646	0.480830474377567	0.998879330486655	Rps27a
0.214966143060692	6.13718901977229	0.49939988817037	0.481088611144933	0.998879330486655	Nrd1
0.167150728679702	6.83169626376127	0.498851757179044	0.481322625598558	0.998879330486655	D8Ertd738e
-0.187046681466045	6.52949738941641	0.497114927472666	0.482085413267889	0.998879330486655	Spag7
-0.232735897622009	5.8443691279219	0.497105892507707	0.482089386500198	0.998879330486655	Papola
-0.318285379293147	5.05531286547281	0.496691900417281	0.482271502486313	0.998879330486655	St3gal5
0.224729154417765	5.96852264588813	0.496549137631916	0.482334330510923	0.998879330486655	Pitpna
-0.328604775423903	5.00375831769424	0.496309229244314	0.482439941526765	0.998879330486655	Kif16b
-0.353521469786247	4.89396320299074	0.496677765684669	0.482527290236159	0.998879330486655	Mitf
-0.318023427102849	5.05543801428784	0.495159933891956	0.482946408371079	0.998879330486655	Nf2
-0.388786406715663	4.70234202209524	0.495275575766655	0.48317638598351	0.998879330486655	Rsu1
-0.321396436260595	5.05783050457689	0.494201523275818	0.483369430249666	0.998879330486655	Ctsh
-0.210458495711502	6.14285077634994	0.493869071194138	0.483516310848089	0.998879330486655	Kpna1
0.0760295466780239	9.53243526874187	0.493459401816398	0.483697408550495	0.998879330486655	Sdha
0.357364430648238	4.82795233665818	0.493030513351777	0.483887122700623	0.998879330486655	Crot
-0.157837833543931	6.98660110375106	0.492652362203874	0.484054496115125	0.998879330486655	Cav1
-0.22631614516217	5.90268362170517	0.490684349078385	0.484927110932268	0.998879330486655	2310061I04Rik
-0.146847966370929	7.23492721124993	0.489947310339663	0.485445974155695	0.998879330486655	Eci2
-0.316731822204569	5.0540548031383	0.488962261880293	0.485692828028909	0.998879330486655	Limd1
-0.192089920708984	6.41053922053172	0.488317009674991	0.485980253965974	0.998879330486655	Gm2225
-0.215775135076563	6.04131500496276	0.487406473943353	0.48638633158847	0.998879330486655	Hhatl
-0.177982772340637	6.61745406357474	0.487020339742292	0.486558709020367	0.998879330486655	Smim7
0.352803594996107	4.83004480814496	0.487013374875459	0.486561819199582	0.998879330486655	Vps13d
0.352803594996107	4.83004480814496	0.487013374875459	0.486561819199582	0.998879330486655	Elf2
0.281959850979554	5.37937871051602	0.486332432426387	0.486866055794358	0.998879330486655	Ggnbp2
0.352544401331358	4.82991442037553	0.485326512174435	0.487316068933878	0.998879330486655	Clcc1
-0.198145158389067	6.3262684432232	0.484694368112063	0.487599222882993	0.998879330486655	Id3
-0.323635637143957	5.00007421735489	0.484393038744931	0.487734292860823	0.998879330486655	Csrp1
0.220633263871	5.9715622175547	0.482277276279082	0.488684439055177	0.998879330486655	Mrps9
-0.314393952652638	5.05317241686857	0.481857715386974	0.488873222909988	0.998879330486655	Sec31a
0.351038277236685	4.8313525345702	0.481761258248234	0.488916641600387	0.998879330486655	Cpsf3
-0.239630414841629	5.74985507973919	0.481461202496071	0.489144030510685	0.998879330486655	Cds2
0.24225211417965	5.74778452400974	0.481428988769835	0.489391294798302	0.998879330486655	Dtna
-0.200260921369663	6.2820960283608	0.480522349976563	0.48947489109198	0.998879330486655	Josd2
0.268156212435445	5.4562096331234	0.478969004704008	0.4901763345855	0.998879330486655	Usp9x
0.118146238030988	7.80197989489256	0.47870592474532	0.490295300287781	0.998879330486655	Nexn
-0.32257670749996	5.00057960490836	0.478399529305665	0.490433914435152	0.998879330486655	Cox10
0.099063172264253	8.4177487496726	0.477878781262612	0.490669653113905	0.998879330486655	Chchd3
-0.295646146049505	5.20355440184255	0.477712985620779	0.49074474743463	0.998879330486655	Tbrg4
-0.303301422722702	5.15739370163003	0.477469356628509	0.490855130042278	0.998879330486655	Dnajc30
-0.151420739217144	7.05045535011364	0.476005241829126	0.491519365040107	0.998879330486655	Ociad1
0.348752259152936	4.83239986947241	0.474830378465181	0.49205346615795	0.998879330486655	Ate1
0.231445119138707	5.78206948926288	0.472975496459386	0.492898698180121	0.998879330486655	Xirp1
0.347974605966961	4.83200840117998	0.472968814162799	0.492901747584307	0.998879330486655	Gm1821
0.190578126979297	6.40779231712413	0.47273818237472	0.493007013742587	0.998879330486655	Srp9
-0.312057476622279	5.0522902878935	0.472604060064488	0.493068247959471	0.998879330486655	B230219D22Rik
-0.0936796816402522	8.59894680912215	0.472037724781466	0.493326952538411	0.998879330486655	Hspa9
0.173552701193277	6.6696164699894	0.470969156685385	0.493815702989107	0.998879330486655	Mgst1
-0.112853441498877	7.97065059203078	0.470611670049513	0.493990351128007	0.998879330486655	Rpl19
0.294510830875352	5.21922608054836	0.470409628193854	0.494071950612386	0.998879330486655	Dcun1d1
0.294510830875352	5.21922608054836	0.470409628193854	0.494071950612386	0.998879330486655	Fxn
0.294271523526649	5.21910549234037	0.468980113913858	0.494727646491687	0.998879330486655	Mia2
-0.306711181075852	5.10603501796938	0.468353643929509	0.495015461895078	0.998879330486655	Fundc1
0.236325549314637	5.72415165454502	0.467062802944257	0.495609398788864	0.998879330486655	Trpc4ap
0.0709621682074002	9.76326274276965	0.466939688875891	0.495666108541497	0.998879330486655	Ndufb11
-0.29922430602259	5.15541423817344	0.466406217700906	0.495911967108921	0.998879330486655	Tgfbr3
0.259780605381547	5.49283782447983	0.466031304041861	0.496084875523679	0.998879330486655	Cstb
0.111930210531571	7.962800831835	0.465505139542539	0.496327712388289	0.998879330486655	Ppp1cb
0.21325754955755	5.99874966752497	0.463557933941237	0.497228147053868	0.998879330486655	Kpna4
0.131300441491589	7.41347735696346	0.463119539586862	0.497431253381898	0.998879330486655	Eif3h
0.0977549457190558	8.43172570314966	0.462947867762466	0.497510826620591	0.998879330486655	Eif4a2
0.212673941666672	5.99845368942406	0.462638288756217	0.497654377173497	0.998879330486655	Ak6
0.291236521476208	5.22165714538775	0.462225377975848	0.497845951779975	0.998879330486655	Ppp6r1
-0.202670550680485	6.16427497047587	0.46220805814989	0.497853990245955	0.998879330486655	Naa20
-0.270782447646034	5.42402556651896	0.461925960227945	0.498007454808556	0.998879330486655	Taok1
0.33362042618522	4.88868077729253	0.460915411065669	0.498454555964472	0.998879330486655	Mettl7a1
-0.27278233536663	5.38051051864734	0.460193311041334	0.498790581254865	0.998879330486655	Myadml2
0.0780346847638306	9.28893932564935	0.459569650508969	0.49908110864861	0.998879330486655	Aes
-0.263332283680501	5.46173897743536	0.459093865241961	0.499302943313797	0.998879330486655	Dctpp1
0.213203836774137	5.9746217414323	0.457796993334242	0.499908463107512	0.998879330486655	Ppp2r5a
-0.275088927607781	5.33766430814098	0.456972747015317	0.50029396135669	0.998879330486655	Dohh
0.343655037664911	4.83423456616706	0.456549964262773	0.500491892809926	0.998879330486655	Gid4
-0.246696220896794	5.61061602673066	0.456536021952103	0.500500549339823	0.998879330486655	Ccdc90b
0.331105974456569	4.88958828698483	0.455961859722209	0.500767444294598	0.998879330486655	Ccdc127
-0.265723273256222	5.42086417187977	0.45592443270841	0.500784989178036	0.998879330486655	Rpl31
-0.148991073437879	7.03723885152464	0.455896843655566	0.500797922934329	0.998879330486655	Epas1
0.343395844000161	4.83410398657739	0.454962430010038	0.501236313555112	0.998879330486655	Tubb2a
0.178106045792091	6.52083205518495	0.454941623072007	0.501246082826689	0.998879330486655	Alkbh7
-0.241356662769035	5.64509140962416	0.454512718345762	0.501447534670471	0.998879330486655	S1pr1
0.192484087638414	6.31349921883721	0.454324416049747	0.501536021928889	0.998879330486655	Ttll1
-0.116173875773774	7.76616955302848	0.454288143213157	0.501553070374709	0.998879330486655	Slc16a1
0.228340077865934	5.75522588687297	0.453461339887486	0.501941941798002	0.998879330486655	Rad21
0.293075900892163	5.18027592700805	0.45318435175269	0.502072333362315	0.998879330486655	Rb1cc1
0.204236675821562	6.11840641687696	0.452978316862849	0.50216936145335	0.998879330486655	Arf5
-0.110068901553564	7.99109256328149	0.452882181060562	0.502225358406283	0.998879330486655	Rabac1
-0.282801169593697	5.24713443693011	0.452612835439721	0.502341556777182	0.998879330486655	Rpn1
0.261417620543496	5.45865241207905	0.45255710086143	0.502367824819756	0.998879330486655	Yipf3
-0.0772957533252064	9.24598881260517	0.451592615741604	0.502822765473401	0.998879330486655	Ldha
0.225911164503381	5.8109909370159	0.450998159856841	0.503125711768775	0.998879330486655	Yipf4
-0.259513776354865	5.45987983937717	0.450704197461676	0.503242451210749	0.998879330486655	Plxnb2
-0.3075061700418	5.10367466281705	0.451590211847225	0.50327932505651	0.998879330486655	Cnn2
-0.247403029284864	5.57403226618358	0.450624903698313	0.503279938516404	0.998879330486655	Ostf1
-0.28707084905888	5.19987706432899	0.449576171755797	0.50377619333637	0.998879330486655	Plaa
0.178086628678434	6.50381666483427	0.449192291965546	0.503958053460052	0.998879330486655	Commd1
-0.264756640493479	5.42132699598546	0.449001275616863	0.504048588020605	0.998879330486655	Tpd52l2
-0.264756640493479	5.42132699598546	0.449001275616863	0.504048588020605	0.998879330486655	Palmd
-0.0676678346892323	9.91066947009226	0.448487360336026	0.504292303310445	0.998879330486655	Uba52
0.233793853809112	5.7228681317444	0.447963426126316	0.504595810283601	0.998879330486655	Rragd
-0.187068719654548	6.36641159384585	0.446368613981602	0.505299224804298	0.998879330486655	Cluh
0.120686860214991	7.62549962531868	0.446334054613135	0.505315677611347	0.998879330486655	Dnaja2
-0.206288612483431	6.06340062571884	0.445599345358124	0.50566567182357	0.998879330486655	Tef
-0.257605838274571	5.45895058658184	0.44549500675371	0.505715409580558	0.998879330486655	Tsen34
0.284877195101344	5.22458224999918	0.444509344282126	0.506185687008722	0.998879330486655	Blcap
-0.292881356955445	5.15060151681786	0.444210520680326	0.506328410160524	0.998879330486655	Aimp2
0.158592343367194	6.8484340486089	0.44313912090563	0.506851277327544	0.998879330486655	Rpl36a
0.0640659630692229	10.2390973995262	0.442831283000286	0.506988058112857	0.998879330486655	Eno3
-0.252748594629066	5.57506391425849	0.443729211668947	0.507078584042712	0.998879330486655	Ifrd1
0.326840372639411	4.89179157401031	0.442457386141309	0.507167137474782	0.998879330486655	Bsdc1
-0.171484693169855	6.5949825029438	0.441780586867423	0.507491571275328	0.998879330486655	Suclg2
-0.285564887031328	5.19865515968473	0.441619816669439	0.507568691598934	0.998879330486655	Hrasls
0.256662080988979	5.49319101203374	0.44164792191754	0.507577132051593	0.998879330486655	Bst2
0.205945120120464	6.02534136803416	0.441512572091316	0.50762014733083	0.998879330486655	Afg3l2
0.0817744431629627	8.97198301678853	0.441477299099474	0.507637073212481	0.998879330486655	Rpl7
0.0675041817535447	9.89027855936978	0.441438737941805	0.50765557805	0.998879330486655	Uqcr10
0.204397386637438	6.09659613134945	0.441299813660771	0.507722255101071	0.998879330486655	Rtl8a
-0.285057028027242	5.19889772047002	0.440819428821058	0.507952933792595	0.998879330486655	Zyx
-0.237326463438288	5.74727689955939	0.44238704848034	0.508088045362918	0.998879330486655	Rps15a-ps6
-0.204193074300894	6.08785524089844	0.440213764373902	0.508249884715474	0.998879330486655	Cdk2ap1
-0.147089762440597	7.02140447090043	0.440038215065704	0.508328456736219	0.998879330486655	Slc38a2
-0.274533583064642	5.29126996193592	0.440020170704193	0.508337136188979	0.998879330486655	Acp1
-0.255698780082675	5.45802154493162	0.43964153682215	0.508519320709071	0.998879330486655	Usp4
0.31801706185891	4.94372997756336	0.439242061723698	0.508711655892867	0.998879330486655	St3gal6
-0.0620706011411559	10.466970453977	0.439214263003306	0.508725044827026	0.998879330486655	Ndufb9
0.199714270248963	6.14245287263232	0.43909700427259	0.508781527868013	0.998879330486655	Eif4g1
-0.149852352012177	6.95457529090994	0.438724323344619	0.508961118904895	0.998879330486655	H3f3b
-0.105280840542683	8.04191931976109	0.43807298429634	0.509275256397538	0.998879330486655	Gm12481
-0.260430695502513	5.41782087394764	0.438044619704858	0.509288944135414	0.998879330486655	4933434E20Rik
0.281684190164812	5.263504317292	0.437207328491563	0.509747337090423	0.998879330486655	Cldnd1
-0.131343672773849	7.32779043484655	0.434913044428613	0.510804068184831	0.998879330486655	Zfp706
-0.0632264071599962	10.3858360659037	0.434478905625888	0.51103644742218	0.998879330486655	Cox7c
0.197027068761885	6.16694143996308	0.43389574636761	0.511297946188192	0.998879330486655	G3bp1
0.275874289427367	5.26663920391041	0.433209272037889	0.511631685824858	0.998879330486655	G3bp2
-0.245247734684532	5.5343668066059	0.432989248211515	0.511738733972697	0.998879330486655	Rab3a
0.129554569888732	7.35631095861719	0.432868520432197	0.511797488218707	0.998879330486655	Edf1
0.137220956456172	7.18814567358205	0.432330328316131	0.512059551745748	0.998879330486655	Ankrd40
0.339585762020455	4.83659321920921	0.431693095940076	0.512530317650968	0.998879330486655	Akr1e1
0.274724863032566	5.26808319648307	0.430455122292767	0.512974482737393	0.998879330486655	Lyrm2
0.280151077761876	5.22629205419516	0.430169037667086	0.513114317096418	0.998879330486655	Commd8
0.280151077761876	5.22629205419516	0.430169037667086	0.513114317096418	0.998879330486655	Slc25a26
0.0979813822133361	8.30080966687182	0.429945282550066	0.513223732038406	0.998879330486655	Serinc3
0.313045958294736	4.94552705080843	0.42994296013061	0.513224867901676	0.998879330486655	Ppic
-0.181162805636658	6.42741550689376	0.429755801955487	0.513322192025538	0.998879330486655	Mapk1
0.193748976938532	6.18905425410159	0.429723625379609	0.513332161300718	0.998879330486655	Scand1
-0.243610825053635	5.53334143367439	0.428100623335628	0.514127316105577	0.998879330486655	Tm2d2
-0.103054043199096	8.09265239464053	0.428024509134501	0.514164659510207	0.998879330486655	Rps26-ps1
0.202317077233373	6.05153217859491	0.427723779657998	0.514312250868468	0.998879330486655	Rbbp4
-0.107441081087083	7.92610406900999	0.427215972180701	0.514561639981734	0.998879330486655	Higd1a
0.237613634486013	5.60078515513076	0.427099125454339	0.51461905450601	0.998879330486655	Ecsit
0.311319159544893	4.9468091200358	0.426524556256745	0.514901541735602	0.998879330486655	Aga
-0.216447409068769	5.83474055859989	0.426472431400815	0.514927182392493	0.998879330486655	Vamp5
-0.207783058066633	6.00790609795894	0.42619407002549	0.515190407227572	0.998879330486655	Ecpas
-0.231551473574592	5.64096749911343	0.424813639151844	0.515744327438312	0.998879330486655	Cul4a
-0.144228514613314	7.0461795805922	0.423409471519425	0.516437821638384	0.998879330486655	Mcl1
0.0695296940798611	9.5978286034621	0.422875113689985	0.516702162413421	0.998879330486655	Etfb
0.236521813967081	5.60023386904794	0.420870562227917	0.517695916529814	0.998879330486655	Actr1b
0.0808288684262427	9.15338980857201	0.422184368969685	0.518080026277645	0.998879330486655	Pdlim5
-0.229957848228767	5.63996815355455	0.419883918845715	0.518186281093754	0.998879330486655	Iars2
0.110352753894843	7.80579409786711	0.419830616730746	0.518212795713718	0.998879330486655	Pebp1
0.17971657653949	6.43109078353181	0.417807161233333	0.519290618948779	0.998879330486655	B230118H07Rik
0.301777409899638	4.99768928858462	0.415842635245459	0.520203396419291	0.998879330486655	Cyb5r4
0.198877909964355	6.05145464027712	0.41533161809046	0.520459448218027	0.998879330486655	Sin3b
0.301526038774289	4.9975630518473	0.414821200612849	0.520715422494968	0.998879330486655	Pdcd10
0.270714886586404	5.30892484815043	0.414820071290452	0.52083948000999	0.998879330486655	Ptprb
-0.237424527039902	5.56983909940128	0.4144674684052	0.520892950060915	0.998879330486655	Plpbp
-0.214970883848886	5.80226531334372	0.414400997381907	0.520926321846109	0.998879330486655	Vps29
0.136712989412981	7.14412968435443	0.414310608577542	0.520971707638857	0.998879330486655	Crip1
0.266097444442985	5.3106021002795	0.413527069256594	0.521365430461436	0.998879330486655	Hipk1
0.204003192369269	5.9784976714127	0.413026821974244	0.521617077335038	0.998879330486655	Aifm1
-0.137130475116314	7.14689489529612	0.412756485811042	0.521753158344769	0.998879330486655	Ifngr2
-0.11869843989082	7.53297346490444	0.412073711411794	0.522097132165497	0.998879330486655	Actb
-0.219552195118681	5.73859040913654	0.411213598524732	0.522531021040915	0.998879330486655	Mettl23
0.208035026218219	5.8996424874846	0.410487181221357	0.522897966185677	0.998879330486655	Sec13
-0.221947994149044	5.70574153316343	0.410471623935452	0.522905829865942	0.998879330486655	Insr
-0.161954961176132	6.66208938788388	0.409939258327603	0.523175049532641	0.998879330486655	Klf9
0.235304307573618	5.56989552890036	0.409387845369707	0.523454161868274	0.998879330486655	Sfpq
0.30057703473212	4.99921052118924	0.409191450291421	0.523553636535113	0.998879330486655	Ubxn4
-0.272831224011734	5.24228298649747	0.408012973427362	0.524170776828021	0.998879330486655	Tmx4
0.174188807304421	6.43450317285158	0.407573325976243	0.524374505571651	0.998879330486655	Cap2
-0.117883750394841	7.56034292942545	0.407038462160303	0.524646345329901	0.998879330486655	Mrps21
-0.193776232298296	6.108901702724	0.406833349388267	0.52475065882542	0.998879330486655	Jup
-0.266881967007961	5.28730469900547	0.406649216617848	0.524844334153339	0.998879330486655	Mrpl49
0.267474856194762	5.27050440614378	0.406345729691378	0.524998794684511	0.998879330486655	Sec11a
0.300828508943325	4.99933682344594	0.405930274469356	0.525231242507357	0.998879330486655	Yme1l1
-0.203470373984087	5.92043969751155	0.405651633065351	0.525352362684177	0.998879330486655	Srgn
-0.0978586529167357	8.15749080223751	0.404179480750544	0.526103678178137	0.998879330486655	Tmem38a
0.295656245245523	5.00099128275586	0.404119834631154	0.526134159218284	0.998879330486655	Gosr2
-0.216444350910331	5.73836130745411	0.403617041474742	0.526391228084442	0.998879330486655	Afap1l1
0.294902070005144	5.0006121874609	0.40349202636056	0.52645518094136	0.998879330486655	Add1
-0.241833147761137	5.49255357679747	0.403179039293947	0.52661535400593	0.998879330486655	Gm16286
0.145269201448879	6.93574713403144	0.402497075840412	0.526964655763962	0.998879330486655	Bcam
-0.218000059257437	5.73761606187339	0.40169344139407	0.527376811237462	0.998879330486655	Htra3
-0.0963683082588414	8.20431639884706	0.400637889630272	0.527919046226961	0.998879330486655	Rpl22
0.138851140603281	7.06210836941864	0.400118475593121	0.528186236156626	0.998879330486655	Rpl36a-ps2
-0.191558564988917	6.13294493975864	0.399588855256856	0.528458926753288	0.998879330486655	Adgrf5
-0.213564044950806	5.76910363167488	0.398723869449107	0.528904835201949	0.998879330486655	Gas5
-0.238695419799031	5.53207798005213	0.398656851179946	0.528949355011202	0.998879330486655	Polr2i
0.293192996147825	5.00188206825979	0.398630329055388	0.528953096753894	0.998879330486655	Tagln
0.293444408515202	5.00200847933734	0.398047709815212	0.529253873970223	0.998879330486655	Zfp651
-0.123653163870858	7.35645302896877	0.397844750510603	0.529358724101044	0.998879330486655	Mcrip2
0.0560749500364553	11.0390366374978	0.396905815830258	0.529844271726956	0.998879330486655	Uqcrq
0.155879679317551	6.70638039785891	0.396048694473373	0.530288213472538	0.998879330486655	Ybx3
-0.177111159552348	6.36110016923912	0.395463639535905	0.530591625578383	0.998879330486655	Ccdc47
-0.237060952619497	5.53105314897702	0.395059464562959	0.530801415749119	0.998879330486655	Inppl1
-0.20757535584792	5.83228461425164	0.394891202567368	0.530888797650203	0.998879330486655	Fyttd1
-0.193952363175506	6.029592760475	0.39444252668701	0.531121931405272	0.998879330486655	Hmgn1
-0.103924861002855	8.09379880406272	0.396046005220912	0.531210136132693	0.998879330486655	Rpl14
0.1929701135076	6.05512592416085	0.394091316063223	0.531304551052551	0.998879330486655	Gm5537
0.168435776914622	6.53980331203036	0.394387767142238	0.531319001967581	0.998879330486655	Mat2a
0.0690796574314026	9.47239051180442	0.393634336791939	0.531542337562824	0.998879330486655	Tpt1-ps3
-0.182282624249009	6.29790416276299	0.39271141830711	0.532101558954033	0.998879330486655	Cope
0.291558298006905	5.04779082392051	0.391952304057215	0.532636566201002	0.998879330486655	Mast2
-0.263811321218773	5.33360237171087	0.391801457424194	0.532993041500887	0.998879330486655	Wtap
0.144064664971961	6.90927446906254	0.389972267876261	0.533454860276183	0.998879330486655	Rbbp7
-0.22517378462848	5.63873539485816	0.389215667214843	0.533876252997989	0.998879330486655	Tmem164
0.158367878012179	6.62868176916243	0.389165426960357	0.533877914489534	0.998879330486655	Nudt3
0.101110842889257	7.97960225648034	0.388861116977603	0.534037633046069	0.998879330486655	Eif5a
0.0904095603098822	8.44152649680861	0.388992783806675	0.534043872734893	0.998879330486655	Rps11
0.202286991150584	5.90367436077651	0.38700249453216	0.53501503061168	0.998879330486655	Mrpl50
-0.0758520000269346	9.00737295233669	0.386496995468199	0.535281422298243	0.998879330486655	Mt1
-0.164470758240032	6.51803772981877	0.385024934271305	0.536058560123681	0.998879330486655	Mtch1
0.289014965403332	5.00404391342911	0.382871060644142	0.53719936469911	0.998879330486655	Svbp
0.200683106351482	5.87693068019824	0.382359340102053	0.537471051971691	0.998879330486655	Tcea3
-0.165195662748441	6.51808973831973	0.382130574348625	0.537602291628065	0.998879330486655	Mrps7
-0.176958571296492	6.29398324837715	0.381993206224964	0.537665597554015	0.998879330486655	Bgn
0.198689805985495	5.90359083938948	0.381836811106098	0.537748737579041	0.998879330486655	Ppp1r11
0.157977054973314	6.61157200587808	0.381355935592724	0.538004519839399	0.998879330486655	Nrap
0.28377330697509	5.05018413736811	0.381039255583417	0.538177643888158	0.998879330486655	Kcnj5
0.166506240019371	6.45580745946337	0.38019166085685	0.538624733694502	0.998879330486655	Lynx1
-0.182853679502871	6.17894711185234	0.379647020042216	0.538915316781895	0.998879330486655	Cuta
0.197702444797356	5.90482771618841	0.378598440489959	0.539475578905443	0.998879330486655	Wdr83os
0.215865074123215	5.67239649990777	0.378431908026826	0.539564656709221	0.998879330486655	Fkbp9
0.176349342666198	6.30065713356757	0.377656337083863	0.539979864404584	0.998879330486655	Kars
0.249737494736023	5.35553443648292	0.377614686503906	0.540002178991147	0.998879330486655	Dglucy
0.281589375147609	5.05119064084587	0.377611899296685	0.540003672317315	0.998879330486655	Tmem159
0.200075870176416	5.87662334692289	0.37725220225912	0.540196454145633	0.998879330486655	Cd34
-0.193016718077136	5.97385013814159	0.377213259575937	0.540217333318556	0.998879330486655	Nid1
0.164625046832708	6.47386837180567	0.377160728572942	0.540245500242632	0.998879330486655	Card19
-0.194612590854153	5.94586196050958	0.376604940563198	0.540543677484813	0.998879330486655	Msrb2
0.277962470130261	5.05357985667204	0.375985535137792	0.540876342693738	0.998879330486655	Gpd1l
-0.182812926431556	6.20239752826651	0.375517728472075	0.541133174122356	0.998879330486655	Calm3
-0.0633010942779332	9.77087961657558	0.375304355823538	0.54124262112014	0.998879330486655	Cyc1
0.186559462881291	6.10288608236973	0.375277361718776	0.541257145607547	0.998879330486655	Hibch
0.210198212699185	5.79108220472474	0.375147188068455	0.541539031815584	0.998879330486655	Ltbp4
-0.292605852573563	5.09892907854558	0.376240134823457	0.542234175940398	0.998879330486655	Slc27a1
-0.0582268951401855	10.3665587833947	0.372360224918138	0.542830999582	0.998879330486655	Sdhb
0.241648560338788	5.39509919937658	0.370144144910686	0.544032292212736	0.998879330486655	Slc25a51
0.275773053398913	5.0545874702663	0.369476065919792	0.544395412458811	0.998879330486655	Ttc32
-0.201308641873038	5.82858524250138	0.369144856814738	0.544575601136736	0.998879330486655	Cops2
0.271944651823185	5.1012016010522	0.368943632706009	0.54468512781625	0.998879330486655	Usp5
-0.0784289661206662	9.19630586855626	0.372666645166371	0.544801575416796	0.998879330486655	Pgam2
-0.178942292609036	6.20124352274666	0.367983975235102	0.545208035172496	0.998879330486655	Hmgb3
0.143039617438767	6.84302504542283	0.367388329729271	0.545533066181432	0.998879330486655	Selenok
0.182391211373967	6.12879558624639	0.366561363108497	0.545984922830936	0.998879330486655	Fkbp8
-0.345325338238219	4.60789800360953	0.364029396155638	0.547372745834606	0.998879330486655	Sec22b
-0.153250713910541	6.62366738067283	0.363436051238542	0.547698923660134	0.998879330486655	Eif3e
-0.174826927048464	6.24757391448871	0.363105809556036	0.547880623989571	0.998879330486655	Dctn6
0.243348118141255	5.4303974208399	0.363389839932981	0.548140985777736	0.998879330486655	Acot7
0.241566382174547	5.43144355289069	0.363012623120871	0.548166261388115	0.998879330486655	Fbln1
0.162661706219106	6.45678691244722	0.361997097317043	0.548491468033099	0.998879330486655	Pyurf
0.267129168389319	5.1029488036997	0.361846155506659	0.5485747279391	0.998879330486655	Cul1
-0.334235594185348	4.67817388748559	0.36155462320127	0.548783980835858	0.998879330486655	Mif4gd
-0.103468027349035	7.78196820861689	0.36132435924095	0.548862734702091	0.998879330486655	Lbh
0.238690027812188	5.39557532032807	0.360846716702699	0.549126619327649	0.998879330486655	Prrc2a
-0.102342283887832	7.78985840338386	0.358651291640461	0.550342601711487	0.998879330486655	Atp1b1
0.205241850102676	5.73645060343658	0.358608834058437	0.55036616760699	0.998879330486655	Gm10709
0.237573996616245	5.39698061237351	0.358057639354371	0.550672278195996	0.998879330486655	Gorasp2
0.181278200011811	6.12985911233148	0.35762750920809	0.550911377227469	0.998879330486655	Sumo1
-0.161516928861968	6.47564595251676	0.357337998200096	0.551072419538994	0.998879330486655	Cct7
0.265458120766177	5.10419416697849	0.356619166092472	0.551472658119787	0.998879330486655	Ddx24
-0.306696272728298	4.80570874634888	0.356358161188082	0.55161811867446	0.998879330486655	Tmem250-ps
-0.334515024887556	4.67803956566536	0.356224117639062	0.551898378199952	0.998879330486655	Rbm17
-0.174355837701615	6.22354911525216	0.355816369854786	0.551920295328236	0.998879330486655	Me1
0.149068385548423	6.72670079019447	0.355218279410906	0.552329995164481	0.998879330486655	Arpp19
0.19133230979497	5.95677403803448	0.355106218526855	0.552339920555276	0.998879330486655	Dpm1
0.233056704320811	5.43494078033027	0.354461070277473	0.55267756508723	0.998879330486655	Hist2h2aa2
-0.31798363044895	4.74209988775385	0.354339489806713	0.55274559376696	0.998879330486655	Rpa1
0.146505545674984	6.7263427406553	0.354289736928217	0.552773436869483	0.998879330486655	Atp6v1e1
0.264472459818228	5.10369898398822	0.354270213128087	0.552784363658491	0.998879330486655	1110002E22Rik
-0.298707650047996	4.86772965332775	0.353453818030667	0.553249833014767	0.998879330486655	Tra2a
0.160990024054868	6.45740399973046	0.353112797094413	0.553432859681787	0.998879330486655	Coa5
-0.0712950799446841	9.12017349680698	0.352407332957236	0.553833189249884	0.998879330486655	Itm2b
0.152760834658796	6.61585717300062	0.352250232632078	0.553917088596356	0.998879330486655	Rps25-ps1
-0.151513636142004	6.6041301374733	0.351833610353131	0.554151260793501	0.998879330486655	Mrpl23-ps1
0.174987558829126	6.24001043559049	0.351775952717334	0.554183683385474	0.998879330486655	Trak2
-0.294905142210031	4.86538152136626	0.351639739779733	0.55426029423185	0.998879330486655	Sulf2
-0.294634683225229	4.86551147174599	0.35093760841311	0.554655515940554	0.998879330486655	Larp4b
0.23484336419107	5.39757314596471	0.349183321881365	0.555645326174434	0.998879330486655	Drg1
0.0744309488012583	8.88890665968896	0.348004048015514	0.556312590317101	0.998879330486655	Rpl8
0.133378391211416	6.95372119856537	0.347027004533205	0.556866584156076	0.998879330486655	Pdrg1
0.199259815454858	5.7677357524251	0.346600159012785	0.557108940247314	0.998879330486655	Hexa
0.121793989009721	7.51896360620175	0.350124448128525	0.55728530390395	0.998879330486655	Gpcpd1
0.0862379890420127	8.34111630377803	0.346117433380389	0.55738326676345	0.998879330486655	Hnrnpa2b1
0.0932327854176208	8.06372743310567	0.346038414302841	0.557428196805261	0.998879330486655	Tomm7
-0.276589681971014	4.97861764716344	0.345859559881517	0.557529918506008	0.998879330486655	Pex13
0.198422924266162	5.76731374669147	0.345587878029247	0.557684502734845	0.998879330486655	Bola1
-0.269777629640857	5.03251324950085	0.345127811378855	0.55794646281642	0.998879330486655	Fbxw5
-0.0917144996038172	8.12423409366074	0.345068358004249	0.557980332483988	0.998879330486655	Tecr
-0.277921489239527	4.98002315385265	0.34391826599944	0.558636296611019	0.998879330486655	Qrsl1
-0.276060217148158	4.97887210314374	0.343540830005385	0.558851891931897	0.998879330486655	Yars2
-0.290298168681483	4.8634249043518	0.34335143133039	0.558960138447022	0.998879330486655	Pcmtd1
0.310523539688515	4.73651709034642	0.343058378096661	0.559127705541882	0.998879330486655	Mxd4
-0.179575229582064	6.07672495184434	0.342620533910366	0.55937824315907	0.998879330486655	Smim19
-0.285186704724135	4.92214332351293	0.341998995741465	0.559734261660744	0.998879330486655	Gemin7
0.166027397145542	6.36448235751554	0.341489331865073	0.560071663492798	0.998879330486655	Tsc22d4
-0.113696327729247	7.37288712800747	0.340101908078345	0.560823612732803	0.998879330486655	Prpf19
0.182542072729871	5.98664113016017	0.339636967597661	0.561091214138173	0.998879330486655	Psmd14
-0.2916540038418	4.86485773681111	0.339633604424593	0.561093150742877	0.998879330486655	Zdhhc3
0.198574042516986	5.7385216270158	0.339464407316424	0.5611905955524	0.998879330486655	Pmp22
-0.26098968232784	5.08373636731889	0.338389268526213	0.561810556798592	0.998879330486655	Erbin
0.201674874196694	5.70862072371129	0.338250840913324	0.561890474712325	0.998879330486655	Pcgf5
0.172787593790851	6.19701821174564	0.338143225118793	0.561952619291773	0.998879330486655	Tpm4
-0.0726185266330099	8.95409869417152	0.336413457951839	0.562953325407273	0.998879330486655	Vdac2
-0.280629402074891	4.9202062526413	0.336118888466268	0.56312408291748	0.998879330486655	Rpl14-ps1
-0.271812825719139	4.97682562198314	0.335577768223392	0.563438023225917	0.998879330486655	Pole4
0.195762093900636	5.76956260003321	0.334994816203179	0.563776611963607	0.998879330486655	Dcun1d2
-0.125260187260974	7.08994240844068	0.334953395807715	0.563800684636672	0.998879330486655	Cd151
0.1973344665209	5.73970909910416	0.334447621967217	0.564094790469397	0.998879330486655	Mgll
-0.0755012396596735	8.76142797729517	0.334202084731888	0.56423767672902	0.998879330486655	Rps25
-0.296022568073769	4.80031192066568	0.333136703209293	0.564858470951338	0.998879330486655	Rbms1
-0.286509489196122	4.86108038128049	0.333121103055433	0.564867570948016	0.998879330486655	Plgrkt
-0.27795195189372	4.91943082567533	0.332999611205389	0.564938450203892	0.998879330486655	Crls1
-0.305542344774637	4.73744594343445	0.332427536417083	0.565272435062135	0.998879330486655	Pak1ip1
0.257723923884268	5.10657004478742	0.332029063467645	0.565505295480737	0.998879330486655	Ranbp1
-0.254086975509838	5.13257108328054	0.33168068977937	0.565709031539761	0.998879330486655	Brcc3
-0.270750304056445	4.97529452791738	0.331637828024453	0.565734107826582	0.998879330486655	Wdtc1
-0.277416835383136	4.91968766215403	0.331607670483375	0.56575175280305	0.998879330486655	Pex11b
-0.257087054557213	5.08160408972287	0.330916543850352	0.566156419875644	0.998879330486655	Fbxw2
0.251396088887294	5.1538352367825	0.330128951678284	0.566618256387059	0.998879330486655	Tmem33
-0.252804273119565	5.13318770917705	0.329906173045635	0.566749024770862	0.998879330486655	Mapk3
0.130340341481047	6.95582427407699	0.329619140750084	0.566917595990722	0.998879330486655	Ppa2
0.257477573737459	5.10644615307808	0.329293325115428	0.567109062737478	0.998879330486655	Ppp3ca
-0.251770306771816	5.13170001253712	0.328684565657164	0.567467140562851	0.998879330486655	Trip10
-0.278756396087791	4.92110550954127	0.328065065108941	0.567831989602302	0.998879330486655	Tmem38b
-0.136767414699059	6.81380831253822	0.327410451234448	0.568218016427926	0.998879330486655	Stard7
0.190198256368958	5.8275663560883	0.327333622245302	0.568263356230357	0.998879330486655	Gm10273
-0.304165638798343	4.73598620972978	0.327100265821399	0.568401112390903	0.998879330486655	Loxl1
-0.243538000284559	5.22846460215462	0.327049627108669	0.568431014317493	0.998879330486655	Pdcd6ip
0.190703507752914	5.79867645241649	0.326836406389149	0.568556953924664	0.998879330486655	Trip12
-0.0883740070274327	8.14692927125637	0.326667052754573	0.568657022172423	0.998879330486655	Gm15501
-0.268630528234551	4.97427234436001	0.325927147560304	0.56909462440235	0.998879330486655	Lsm8
-0.255008253025273	5.08060074054346	0.325836319350449	0.569148388380854	0.998879330486655	Tmem11
-0.24050431006403	5.2753111174532	0.325560719834884	0.569311585023622	0.998879330486655	Tsnax
-0.191232476862422	5.82401193148838	0.325193245473912	0.569547662933843	0.998879330486655	Eif2s1
0.239113859225609	5.39382230920412	0.326002635222887	0.569873529420574	0.998879330486655	Rpl3-ps1
0.228487685559055	5.40028118127365	0.323258019476597	0.570682867421337	0.998879330486655	Akr7a5
-0.262161465573642	5.03010216388926	0.323137095423032	0.570750699512049	0.998879330486655	Ssbp2
0.191842886821307	5.77117890608602	0.322964335989359	0.570853554449338	0.998879330486655	Ninj1
0.0858912690276181	8.23238834435703	0.322912349736362	0.570884512382963	0.998879330486655	Cnbp
-0.24894185403549	5.13107569121488	0.3228274118391	0.570935100200238	0.998879330486655	Sf1
0.291808006076247	4.79886471785889	0.322502685093549	0.571128584190797	0.998879330486655	Pop5
-0.178549328879915	6.04865524103089	0.322268335256188	0.571375545450989	0.998879330486655	Hand2
0.291546079214989	4.79873366600666	0.321618231837148	0.57165622846252	0.998879330486655	Kyat1
0.22204979383194	5.43914400254798	0.321347774955433	0.571817768444722	0.998879330486655	Nsmce1
-0.104450232442627	7.53542585919005	0.319257868229384	0.573069081280764	0.998879330486655	Fam162a
[truncated: 1,699 more rows]

## Sheet: Supplementary_Table_4
chromosome	normal_rep1	as_all_rep1	as_unblocked_rep1	normal_rep2	as_all_rep2	as_unblocked_rep2
1	65032	74754	390	49029	56737	99
2	43499	49721	51	33321	39148	20
3	35251	39466	54	27350	31872	12
4	19633	22439	23	15615	18219	8
5	31797	36314	49	24673	29104	7
6	35693	40987	33	27250	32038	14
7	39220	44829	42	30898	35733	9
8	19745	22625	20	15606	18306	7
9	21060	24080	26	15626	18571	8
10	22815	26415	25	16898	19813	9
11	46494	53126	54	36181	41826	21
12	46273	52386	65	34953	40947	17
13	10096	11534	35	7801	9271	18
14	17863	20292	23	13480	15838	8
15	34870	39985	48	27121	31378	16
16	23384	26622	29	18059	20894	6
17	41750	47533	46	31935	37464	11
18	6720	7589	5	5456	6090	6
19	49363	56154	59	38224	44512	18
20	16867	19193	22	12584	14700	3
21	5619	6664	7	4419	5122	0
22	13782	15624	15	10584	12477	7
X	20534	23374	29	16234	19037	7
Y	570	547	1	359	479	0
MT	81783	61355	44396	49382	35354	25332

## Sheet: Supplementary_Table_5
Gene	chromosome	adaptive_sampling_pass_rep1	normal_run_pass_genes_rep1	adaptive_sampling_pass_unblock_rep1	adaptive_sampling_pass_rep2	normal_run_pass_genes_rep2	adaptive_sampling_pass_unblock_rep2
TSPAN6	X	58	33	0	35	36	0
TNMD	X	8	12	0	8	5	0
DPM1	20	37	24	0	23	29	0
SCYL3	1	8	5	0	4	11	0
C1orf112	1	2	0	0	3	1	0
FGR	1	0	0	0	0	0	0
CFH	1	21	12	0	15	11	0
FUCA2	6	35	24	0	18	25	0
GCLC	6	8	4	0	7	3	0
NFYA	6	14	11	0	11	6	0
STPG1	1	2	3	0	3	1	0
NIPAL3	1	9	8	0	5	6	0
LAS1L	X	12	13	0	9	1	0
ENPP4	6	3	5	0	5	3	0
SEMA3F	3	7	7	0	4	4	0
CFTR	7	0	0	0	0	0	0
ANKIB1	7	9	4	0	5	4	0
CYP51A1	7	61	36	0	35	24	0
KRIT1	7	10	5	0	3	7	0
RAD52	12	3	2	0	0	2	0
MYH16	7	0	0	0	0	0	0
BAD	11	84	82	0	78	68	0
LAP3	4	24	34	0	30	20	0
CD99	X	394	355	0	320	283	0
HS3ST1	4	0	1	0	0	0	0
AOC1	7	0	0	0	0	0	0
WNT16	7	0	0	0	0	0	0
HECW1	7	0	0	0	0	1	0
MAD1L1	7	20	6	0	7	9	0
LASP1	17	106	99	0	77	52	0
SNX11	17	19	7	0	10	8	0
TMEM176A	7	21	11	0	9	15	0
M6PR	12	44	56	0	44	36	0
KLHL13	X	54	50	0	31	38	0
CYP26B1	2	5	5	0	2	3	0
ICA1	7	44	14	0	20	16	0
DBNDD1	16	4	3	0	4	3	0
ALS2	2	16	24	0	24	17	0
CASP10	2	1	0	0	2	0	0
CFLAR	2	21	21	0	6	10	0
TFPI	2	12	19	0	21	13	0
NDUFAF7	2	11	7	0	4	5	0
RBM5	3	33	23	0	31	22	0
MTMR7	8	1	0	0	0	0	0
SLC7A2	8	8	6	0	6	5	0
ARF5	7	120	100	0	96	74	0
SARM1	17	2	1	0	4	4	0
POLDIP2	17	56	52	0	47	41	0
PLXND1	3	10	19	0	15	11	0
AK2	1	104	67	0	74	75	0
CD38	4	0	0	0	1	0	0
FKBP4	12	80	93	0	69	73	0
KDM1A	1	55	54	0	40	35	0
RBM6	3	23	7	0	5	3	0
CAMKK1	17	7	3	0	6	4	0
RECQL	12	15	9	0	5	4	0
VPS50	7	15	15	0	18	6	0
HSPB6	19	58	43	0	28	37	0
ARHGAP33	19	7	4	0	3	1	0
NDUFAB1	16	196	184	0	205	160	0
PDK4	7	0	1	0	0	0	0
SLC22A16	6	1	0	0	0	0	0
ZMYND10	3	0	0	0	0	0	0
ABCB5	7	0	0	0	0	0	0
ARX	X	0	0	0	0	0	0
SLC25A13	7	14	14	0	12	16	0
ST7	7	23	21	1	11	27	1
CDC27	17	24	21	0	19	12	0
SLC4A1	17	0	0	0	0	0	0
CALCR	7	0	0	0	0	0	0
HCCS	X	30	23	0	15	15	0
DVL2	17	27	22	0	18	22	0
PRSS22	16	0	0	0	0	0	0
UPF1	19	37	17	0	17	11	0
SKAP2	7	2	5	0	1	2	0
SLC25A5	X	462	399	4	357	319	4
MCUB	4	1	2	0	2	0	0
HOXA11	7	0	0	0	0	0	0
POLR2J	7	97	65	0	89	79	0
DHX33	17	8	4	0	3	8	0
MEOX1	17	2	1	0	2	1	0
THSD7A	7	1	1	0	1	1	0
LIG3	17	15	4	0	8	9	0
RPAP3	12	10	17	0	16	13	0
ACSM3	16	5	4	0	4	5	0
REXO5	16	8	12	0	12	6	0
CIAPIN1	16	41	52	0	50	24	0
SPPL2B	19	16	12	0	10	8	0
FAM214B	9	23	11	0	9	4	0
COPZ2	17	34	30	0	19	31	0
PRKAR2B	7	27	22	0	21	20	0
MSL3	X	9	9	0	9	6	0
CREBBP	16	12	17	0	13	5	0
TSPOAP1	17	1	2	0	1	7	0
MPO	17	0	0	0	0	0	0
PON1	7	0	0	0	0	0	0
GCFC2	2	9	6	0	1	5	0
WDR54	2	24	22	0	11	14	0
CROT	7	9	3	0	5	2	0
ABCB4	7	2	0	0	1	2	0
KMT2E	7	14	8	0	7	2	0
RHBDD2	7	38	37	0	31	30	0
SOX8	16	0	0	0	1	2	0
IBTK	6	10	18	0	12	15	0
ZNF195	11	10	12	0	3	5	0
MYCBP2	13	5	3	0	4	10	0
FBXL3	13	18	21	0	13	12	0
ITGAL	16	0	0	0	0	0	0
PDK2	17	72	68	0	58	36	0
ITGA3	17	40	44	0	28	22	0
ZFX	X	5	4	0	2	1	0
LAMP2	X	36	41	0	33	22	0
ITGA2B	17	0	0	0	0	0	0
ASB4	7	0	0	0	0	0	0
GDE1	16	54	60	0	33	27	0
REX1BD	19	41	39	0	33	26	0
CRLF1	19	0	2	0	0	0	0
AC003665.1	17	1	3	0	0	0	0
TMEM98	17	82	79	0	82	51	0
YBX2	17	3	4	0	4	2	0
KRT33A	17	0	0	0	0	0	0
MAP3K14	17	1	2	0	1	0	0
ABCC8	11	0	0	0	0	0	0
CACNG3	16	1	2	0	0	0	0
TMEM132A	11	56	72	0	47	54	0
AP2B1	17	119	76	0	55	44	0
TAC1	7	0	0	0	0	0	0
ZNF263	16	7	13	0	7	4	0
CX3CL1	16	4	0	0	2	6	0
SPATA20	17	40	27	0	25	15	0
CACNA1G	17	10	14	0	9	6	0
TNFRSF12A	16	277	231	0	197	156	0
DLX6	7	0	0	0	0	0	0
MAP3K9	14	3	3	0	1	0	0
RALA	7	34	27	0	28	21	0
BAIAP2L1	7	4	4	0	1	2	0
KDM7A	7	1	3	0	2	2	0
ETV1	7	58	42	0	47	29	0
AGK	7	25	9	0	7	7	0
ALDH3B1	11	4	0	0	1	2	0
TTC22	1	0	0	0	0	0	0
PHTF2	7	28	28	0	27	19	0
CCL26	7	1	0	0	0	0	0
FARP2	2	6	6	0	5	4	0
USH1C	11	0	0	0	1	0	0
GGCT	7	40	33	0	29	30	0
DBF4	7	8	8	0	6	4	0
TBXA2R	19	0	0	0	0	0	0
IFRD1	7	22	15	0	10	13	0
LGALS14	19	0	0	0	0	0	0
COX10	17	8	12	0	13	4	0
GTF2IRD1	7	18	17	0	8	8	0
PAF1	19	12	12	0	8	13	0
VPS41	7	19	19	1	21	19	1
ARHGAP44	17	2	3	0	1	0	0
ELAC2	17	29	24	0	17	16	0
SCIN	7	0	0	0	0	0	0
ARSD	X	12	8	0	6	3	0
PNPLA4	X	21	15	0	14	15	0
MYH13	17	0	0	0	0	0	0
ADIPOR2	12	22	19	0	19	11	0
CDKL3	5	1	0	0	2	3	0
UPP2	2	1	1	0	0	0	0
PRSS21	16	0	0	0	0	0	0
MARK4	19	40	30	0	19	30	0
PROM1	4	1	0	0	0	0	0
CCDC124	19	65	53	0	42	39	0
CEACAM21	19	0	0	0	0	0	0
PAFAH1B1	17	62	67	0	54	67	0
NOS2	17	0	0	0	0	0	0
DNAH9	17	0	0	0	0	1	0
KIAA0100	17	44	38	0	19	18	0
SLC13A2	17	0	0	0	0	0	0
GAS7	17	11	13	0	8	5	0
TRAPPC6A	19	29	20	0	24	12	0
MATK	19	0	0	0	0	0	0
CEACAM7	19	0	0	0	0	0	0
CD79B	17	0	0	0	0	0	0
SCN4A	17	0	0	0	0	0	0
ST7L	1	23	8	0	5	3	0
TKTL1	X	0	0	0	1	3	0
PAX6	11	3	3	0	1	2	0
RPUSD1	16	14	10	0	13	12	0
RHBDF1	16	8	5	0	6	5	0
LUC7L	16	10	13	0	7	8	0
CACNA2D2	3	6	5	0	9	6	0
BAIAP3	16	0	0	0	1	0	0
TSR3	16	77	63	0	56	47	0
PIGQ	16	11	27	0	14	11	0
CRAMP1	16	7	4	0	5	5	0
TEAD3	6	52	38	0	35	29	0
SELE	1	0	0	0	0	0	0
DNAJC11	1	41	35	0	21	17	0
FMO3	1	0	0	0	0	0	0
MYLIP	6	10	16	0	7	10	0
NOX1	X	0	0	0	1	0	0
E2F2	1	1	2	0	1	0	0
PSMB1	6	218	184	1	168	145	1
SYN1	X	10	14	0	5	4	0
JARID2	6	10	7	0	4	5	0
CDKL5	X	1	2	0	2	3	0
CAMK1G	1	5	1	0	2	1	0
CDK11A	1	11	12	0	10	11	0
NADK	1	17	27	0	15	15	0
TFAP2B	6	0	0	0	0	0	0
TFAP2D	6	0	0	0	0	0	0
DLEC1	3	0	0	0	0	0	0
CYTH3	7	19	14	0	16	11	0
ADAM22	7	1	2	0	0	1	0
SYPL1	7	59	43	0	49	38	0
CYB561	17	3	2	0	2	2	0
SPAG9	17	9	14	0	13	7	0
CELSR3	3	3	2	0	1	0	0
AASS	7	14	4	0	7	6	0
PLEKHG6	12	0	0	0	0	0	0
SS18L2	3	18	16	0	8	6	0
MPND	19	19	19	0	26	15	0
MGST1	12	53	55	0	46	30	0
CRY1	12	32	13	0	12	13	0
PGLYRP1	19	0	0	0	0	0	0
NFIX	19	16	12	0	13	9	0
ST3GAL1	8	22	23	0	24	11	0
MMP25	16	0	0	0	0	0	0
IL32	16	32	20	1	20	17	1
PKD1	16	20	20	0	5	11	0
MAPK8IP2	22	3	0	0	0	0	0
MED24	17	18	31	0	22	17	0
RHOBTB2	8	25	27	0	14	9	0
HEATR5B	2	8	7	0	7	10	0
SEC62	3	42	31	0	33	23	0
RPS20	8	2128	1825	3	1946	1631	3
CSDE1	1	343	312	0	174	179	0
UBE3C	7	19	26	0	16	20	0
REV3L	6	11	8	0	4	9	0
TENM1	X	0	0	0	0	0	0
PAX7	1	0	0	0	0	0	0
MASP2	1	0	0	0	0	0	0
IYD	6	0	0	0	0	0	0
FAM76A	1	4	11	0	7	1	0
TRAF3IP3	1	0	0	0	0	0	0
POMT2	14	13	10	0	8	4	0
VTA1	6	50	40	0	29	33	0
MLXIPL	7	0	0	0	0	0	0
BAZ1B	7	18	22	0	22	13	0
RANBP9	6	34	33	0	30	23	0
ETV7	6	0	0	0	0	0	0
SPRTN	1	1	5	0	3	7	0
EEF1AKNMT	1	12	20	0	9	3	0
DYRK4	12	41	34	0	27	29	0
ZNF207	17	97	56	0	71	52	0
UQCRC1	3	237	222	1	194	161	1
STARD3NL	7	93	59	0	61	49	0
CD9	12	15	10	0	9	7	0
HHATL	3	4	6	0	4	6	0
NCAPD2	12	31	27	0	19	10	0
IFFO1	12	13	13	0	16	2	0
GIPR	19	0	1	0	0	0	0
PHF7	3	1	0	0	0	2	0
SEMA3G	3	1	1	0	0	0	0
NISCH	3	49	52	0	43	35	0
STAB1	3	0	0	0	0	0	0
FUZ	19	24	6	0	15	11	0
SLC6A13	12	0	1	0	0	1	0
IDS	X	21	20	0	13	16	0
PRSS3	9	0	0	0	0	0	0
ZNF200	16	10	8	0	2	5	0
CD4	12	0	1	0	1	0	0
LRRC23	12	14	14	0	13	10	0
BTK	X	2	0	0	0	1	0
HFE	6	0	1	0	0	0	0
SCMH1	1	27	18	0	20	12	0
FYN	6	45	37	0	20	31	0
HIVEP2	6	15	3	0	2	8	0
FMO1	1	0	0	0	1	0	0
ELOA	1	19	18	0	17	13	0
LYPLA2	1	29	31	0	22	36	0
CLCN6	1	3	6	0	6	4	0
AC080038.1	17	101	138	0	63	61	0
NME1-NME2	17	8	5	0	12	5	0
SLC6A7	5	0	0	0	0	0	0
TSPAN9	12	113	102	0	83	86	0
BTBD7	14	14	8	0	8	8	0
APBA3	19	3	6	0	1	6	0
MKS1	17	6	6	0	1	5	0
ABHD5	3	12	6	0	6	4	0
ANOS1	X	27	26	0	23	22	0
AKAP8L	19	50	39	0	23	33	0
MBTD1	17	14	13	0	7	8	0
UTP18	17	14	10	0	9	7	0
RNF216	7	30	22	1	9	13	1
TTC19	17	24	22	0	31	18	0
PTBP1	19	72	58	0	44	35	0
DPF1	19	2	0	0	3	1	0
SYT7	11	1	2	0	1	0	0
LARS2	3	8	14	0	9	7	0
PIK3C2A	11	9	6	0	3	9	0
PLAUR	19	8	4	0	2	1	0
ANLN	7	68	69	0	38	24	0
WIZ	19	23	24	0	12	14	0
RABGAP1	9	39	27	0	15	11	0
DCN	12	147	118	0	83	72	0
QPCTL	19	3	7	0	2	3	0
PPP5C	19	50	49	1	30	32	1
CEP68	2	15	15	0	8	7	0
MAP4K3	2	27	27	0	14	13	0
ZBTB32	19	0	0	0	0	0	0
TYROBP	19	0	0	0	0	0	0
TMEM159	16	46	51	0	44	30	0
GABRA3	X	2	0	0	0	0	0
BRCA1	17	6	3	0	0	1	0
ERCC1	19	66	63	0	44	34	0
CD22	19	1	0	0	1	0	0
SEMA3B	3	7	6	0	5	3	0
MBTPS2	X	14	12	0	8	10	0
PRICKLE3	X	1	4	0	2	1	0
LTF	3	0	0	0	0	0	0
EXTL3	8	39	25	0	28	22	0
NR1H4	12	2	2	0	2	5	0
ELOVL5	6	61	49	0	41	33	0
ALOX5	10	0	0	0	0	0	0
KDM5D	Y	12	17	0	11	5	0
CALCOCO1	12	26	34	0	27	22	0
UBR7	14	19	30	0	11	12	0
MAP4K5	14	17	16	0	21	26	0
EHD3	2	73	63	0	51	45	0
PSMC4	19	65	58	0	49	50	0
MAN2B2	4	12	10	0	7	11	0
SLC7A14	3	0	0	0	0	0	0
CLDN11	3	1	0	0	1	1	0
SLC25A39	17	94	82	0	70	70	0
MVP	16	16	12	0	15	8	0
NUB1	7	20	20	0	19	24	0
PGM3	6	40	35	0	25	22	0
RWDD2A	6	13	19	0	12	14	0
CLK1	2	25	16	0	17	17	0
POLR3B	12	11	7	0	4	2	0
ANGEL1	14	6	9	0	8	5	0
RNF14	5	29	26	0	37	27	0
DNASE1L1	X	33	21	0	21	13	0
DDX11	12	4	7	0	0	5	0
HEBP1	12	40	45	0	40	41	0
GPRC5A	12	0	2	0	0	2	0
MAMLD1	X	5	4	0	2	5	0
CD6	11	0	0	0	0	1	0
TACC3	4	15	32	0	11	5	0
UFL1	6	17	14	0	11	6	0
POLA2	11	8	15	0	12	9	0
ZC3H3	8	9	6	0	7	6	0
CAPN1	11	49	50	0	68	27	0
ACPP	3	0	0	0	0	2	0
MDH1	2	706	608	2	623	505	2
SLC30A9	4	31	25	0	25	16	0
MTMR11	1	6	0	0	2	1	0
COX15	10	15	10	0	7	10	0
CCDC88C	14	0	0	0	1	0	0
YAF2	12	27	25	0	19	25	0
ZMYND11	10	51	39	0	33	17	0
WAS	X	1	0	0	0	0	0
DPEP1	16	0	1	0	1	0	0
BID	22	12	11	0	15	3	0
MATR3	5	118	109	0	73	65	0
NPC1L1	7	0	0	0	0	0	0
XYLT2	17	10	14	0	5	5	0
RGPD5	2	12	9	0	3	3	0
STMN4	8	0	0	0	0	0	0
NUDCD3	7	35	35	0	23	19	0
ISL1	5	15	17	0	5	2	0
CHDH	3	2	0	0	1	4	0
IL20RA	6	0	0	0	1	1	0
CLCA1	1	0	0	0	0	0	0
CLCA4	1	0	0	0	0	0	0
GLT8D1	3	48	26	0	26	14	0
ATP2C1	3	44	36	0	36	22	0
IGF1	12	1	3	0	5	1	0
SLC38A5	X	0	0	0	1	2	0
RALBP1	18	29	28	0	18	19	0
RUFY3	4	9	8	0	7	7	0
CNTN1	12	17	14	0	14	10	0
SLC11A1	2	2	0	0	0	0	0
WWTR1	3	51	45	0	40	37	0
AGPS	2	14	18	0	10	16	0
ZNF806	2	0	0	0	0	0	0
CXorf56	X	9	3	0	5	7	0
ATP1A2	1	15	13	0	18	7	0
TTC27	2	15	11	0	25	7	0
ZNF582	19	0	4	0	1	1	0
VSIG2	11	0	0	0	0	0	0
PHLDB1	11	45	41	0	37	27	0
MARCO	2	0	0	0	0	0	0
CYP24A1	20	0	0	0	0	0	0
PRDM11	11	14	5	0	6	11	0
SYT13	11	0	0	0	0	0	0
SNAI2	8	29	27	0	28	19	0
CD74	5	2	1	0	0	0	0
HGF	7	2	0	0	2	6	0
ZRANB1	10	30	26	0	17	15	0
NCDN	1	22	10	0	11	5	0
ADGRA2	8	72	56	1	53	34	1
CCT8L1P	7	0	0	0	0	0	0
ZFP64	20	17	7	0	4	4	0
MNAT1	14	17	15	0	10	13	0
SAMD4A	14	36	36	0	25	18	0
RUNX3	1	0	0	0	0	0	0
MRE11	11	4	4	0	3	3	0
PLEKHB1	11	8	6	0	10	7	0
SERPINB1	6	7	9	0	7	6	0
CYP3A43	7	0	0	0	0	0	0
SLC7A9	19	0	0	0	0	0	0
SPAST	2	12	7	0	5	5	0
NRXN3	14	2	2	0	0	0	0
OSBPL5	11	10	6	0	5	5	0
AQR	15	16	13	0	5	9	0
CPS1	2	5	2	0	3	1	0
C8B	1	0	0	0	0	0	0
FHL1	X	448	334	2	272	237	2
RTF2	20	63	53	0	50	45	0
GABRA1	5	0	0	0	1	0	0
NLRP2	19	12	10	0	11	9	0
SLC45A4	8	2	6	0	3	1	0
RNF10	12	111	94	1	90	70	1
ZNF839	14	4	4	0	4	1	0
ZDHHC6	10	13	9	0	10	10	0
GRAMD1B	11	6	2	0	2	3	0
RNH1	11	100	103	1	73	75	1
NDUFS1	2	70	53	0	38	39	0
RB1CC1	8	17	17	0	10	4	0
ERP44	9	30	31	0	32	24	0
ALAS1	3	55	45	0	38	30	0
BIRC3	11	0	0	0	0	1	0
AKAP11	13	12	7	1	5	7	1
GLRX2	1	28	21	0	18	21	0
SNAPC1	14	9	5	0	5	7	0
DERA	12	19	8	0	7	12	0
STRAP	12	162	128	1	132	106	1
ABCC2	10	0	0	0	0	0	0
DEF6	6	1	0	0	0	0	0
PLEKHO1	1	69	70	0	62	57	0
GCLM	1	7	5	0	2	8	0
UBR2	6	5	4	1	9	5	1
EHD2	19	42	42	0	27	23	0
DEPDC1	1	11	18	0	14	12	0
CCDC28A	6	2	1	0	5	3	0
RRAGD	6	37	34	0	24	22	0
HSF2	6	27	25	0	17	11	0
PHF20	20	22	24	0	20	24	0
HSD17B6	12	1	1	0	0	0	0
NR1H3	11	3	3	0	0	5	0
TYMP	22	4	2	0	6	4	0
NCAPH2	22	30	11	0	28	15	0
TOMM34	20	25	22	0	21	19	0
SEC63	6	32	22	0	25	19	0
KPNA6	1	21	19	0	17	7	0
VIM	10	1903	1711	1	997	811	1
RTEL1-TNFRSF6B	20	3	0	0	2	0	0
FAS	10	3	3	0	2	4	0
RNASET2	6	13	2	0	8	5	0
CD44	11	13	10	0	6	6	0
KCNG1	20	8	5	0	4	3	0
AGPAT4	6	13	7	0	12	6	0
SLAMF7	1	0	0	0	0	0	0
BTN3A1	6	3	6	0	1	0	0
MIPEP	13	8	7	0	6	6	0
PRKCH	14	28	13	0	14	6	0
INSRR	1	0	0	0	0	0	0
IFNGR1	6	34	13	0	14	12	0
B4GALT7	5	25	21	1	16	15	1
SH2D2A	1	0	0	0	0	0	0
VRK2	2	9	9	0	7	9	0
TNFRSF1B	1	1	0	0	0	2	0
VEZT	12	35	31	0	24	22	0
POU2F2	19	0	0	0	0	0	0
BRD9	5	12	10	0	5	9	0
SNX1	15	32	26	0	21	23	0
TBPL1	6	17	9	0	10	7	0
ARNTL2	12	5	4	0	3	3	0
BCLAF1	6	40	26	0	22	18	0
SLC39A9	14	12	13	0	14	7	0
ANK1	8	4	0	0	1	2	0
IBSP	4	0	0	0	0	0	0
TFB1M	6	8	8	0	5	4	0
RABEP1	17	40	21	1	23	15	1
HMGB3	X	78	57	0	44	31	0
NUP160	11	14	7	0	9	11	0
BAK1	6	22	27	0	28	17	0
MUSK	9	0	0	0	0	0	0
IKZF2	2	1	0	0	1	2	0
GRN	17	136	147	0	114	95	0
FAM13B	5	4	9	0	7	6	0
ARHGAP31	3	19	16	0	15	14	0
CENPQ	6	6	5	0	2	3	0
SARS	1	101	83	0	54	61	0
RANBP3	19	37	31	0	21	24	0
ARID4A	14	2	4	0	2	2	0
EIPR1	2	13	22	0	10	3	0
PNPLA6	19	14	9	0	8	16	0
IFT88	13	6	3	0	8	2	0
ALG1	16	16	8	0	7	5	0
ZCCHC8	12	18	6	0	4	6	0
ABCF2	7	34	35	0	29	27	0
CHPF2	7	27	35	0	17	16	0
LRRC7	1	1	2	0	0	1	0
FUT8	14	10	2	0	6	3	0
UBA6	4	11	9	0	8	4	0
GAB2	11	13	5	0	5	6	0
ATP6V0A1	17	19	10	0	12	8	0
PIAS1	15	24	27	0	9	17	0
SLC4A7	3	11	7	0	8	5	0
APBA2	15	9	7	0	5	7	0
MAP2K3	17	23	17	0	17	16	0
EFCAB1	8	0	0	0	0	0	0
TMSB10	2	1494	1267	0	1128	978	0
ASTE1	3	2	4	0	6	1	0
RNF19A	8	29	27	0	16	14	0
PEX3	6	7	5	0	3	6	0
GABARAPL2	16	163	142	0	156	142	0
MYOC	1	0	0	0	0	0	0
SH3YL1	2	8	8	0	8	6	0
FAM136A	2	42	47	0	36	28	0
VCL	10	123	130	0	98	69	0
DEPDC1B	5	2	3	0	4	2	0
DAPK2	15	4	3	0	3	2	0
NSMAF	8	7	8	0	7	7	0
ADSS	1	26	14	0	11	10	0
STAP1	4	0	0	0	0	0	0
TIMP2	17	103	102	1	77	53	1
RFC1	4	20	11	0	10	12	0
TBC1D23	3	12	6	1	8	6	1
CUL3	2	54	35	0	42	26	0
MYOM2	8	37	38	0	35	30	0
OTC	X	0	0	0	0	0	0
CYP46A1	14	3	3	0	2	2	0
AC118549.1	1	11	14	0	8	5	0
SLC18A1	8	0	0	0	0	0	0
USP2	11	9	12	0	8	8	0
CASR	3	0	0	0	0	0	0
TUBG2	17	14	16	0	5	8	0
RPL26L1	5	51	48	0	41	43	0
FLT4	5	0	0	0	0	0	0
NSUN2	5	21	16	0	18	16	0
FBXO42	1	17	14	0	7	8	0
MFAP3	5	12	7	0	6	8	0
MRI1	19	2	2	0	4	5	0
METTL1	12	10	4	0	6	5	0
HOXC8	12	1	0	0	0	1	0
AGA	4	5	7	0	4	2	0
PI4K2B	4	6	5	0	3	3	0
BOD1L1	4	9	4	0	2	4	0
MAT2B	5	38	39	0	40	22	0
TLL1	4	2	3	0	2	1	0
EDC4	16	15	32	0	22	15	0
TRIO	5	26	17	0	14	16	0
VCAN	5	252	221	0	176	128	0
CLEC16A	16	6	4	0	7	7	0
MSR1	8	0	0	0	0	0	0
CDH1	16	0	0	0	0	1	0
MTREX	5	18	12	0	16	15	0
DNAH5	5	0	0	0	0	0	0
ZFYVE16	5	14	26	0	7	10	0
RIPOR1	16	30	31	0	20	13	0
C6	5	0	0	0	0	1	0
RAI14	5	85	80	0	60	55	0
SOX30	5	0	0	0	0	0	0
PNKP	19	35	18	0	20	23	0
BEST2	19	0	0	0	0	0	0
PHLPP2	16	1	5	0	4	3	0
SPDL1	5	8	14	0	15	6	0
STAU2	8	34	30	0	29	24	0
PQLC2	1	12	13	0	8	8	0
CTNS	17	9	16	0	11	0	0
RTN4R	22	2	3	0	1	0	0
PHF23	17	51	54	0	44	32	0
CDH10	5	0	0	0	0	0	0
INPP4A	2	11	7	0	4	7	0
RAB27B	18	0	0	0	0	0	0
PSMA4	15	121	96	0	73	77	0
MYO16	13	0	0	0	0	0	0
LSG1	3	7	19	0	2	7	0
PARP3	3	6	6	0	2	4	0
TNC	9	34	27	0	20	19	0
THAP3	1	8	14	0	7	13	0
RIPOR3	20	0	0	0	0	0	0
TDP1	14	7	5	0	6	2	0
AIFM2	10	10	2	0	6	3	0
C2orf83	2	0	0	0	0	0	0
SPATA7	14	7	6	0	5	4	0
MED17	11	14	7	0	7	14	0
RETSAT	2	11	2	0	6	6	0
CAPG	2	3	2	0	3	3	0
AP2S1	19	198	169	0	115	128	0
USH2A	1	0	0	0	0	0	0
ZPBP	7	0	0	0	0	0	0
TG	8	2	1	0	1	2	0
ADAM28	8	0	1	0	0	0	0
BARX2	11	0	0	0	0	0	0
DCUN1D1	3	17	23	0	12	12	0
JADE2	5	0	0	0	2	3	0
ZIC2	13	0	0	0	0	0	0
LCP2	5	0	0	0	0	0	0
TRIT1	1	10	8	0	4	11	0
ADRB1	10	0	1	0	1	0	0
GUCA2B	1	0	0	0	0	0	0
CUL7	6	19	22	0	12	7	0
CTNNA1	5	294	260	2	206	157	2
PHKA2	X	8	5	0	2	4	0
CNTLN	9	2	3	0	6	1	0
EPHA3	3	1	3	0	3	0	0
HSPA5	9	417	328	1	282	242	1
DSG2	18	22	19	0	22	19	0
GEMIN8	X	17	14	0	8	13	0
OFD1	X	6	5	0	2	4	0
GPM6B	X	6	5	0	1	0	0
MAGEC2	X	0	0	0	0	0	0
PREX2	8	1	0	0	0	0	0
WDR37	10	11	7	0	10	3	0
YTHDC2	5	6	3	0	2	4	0
CTPS2	X	9	14	0	4	3	0
ATP6V1H	8	29	29	0	20	29	0
POLR2B	4	66	75	0	35	26	0
FAM214A	15	7	12	0	6	7	0
ARAP2	4	0	0	0	0	0	0
TPR	1	23	13	0	18	15	0
CP	3	0	0	0	0	0	0
KIAA0556	16	7	5	0	7	0	0
DTNBP1	6	20	13	0	8	11	0
XK	X	0	1	0	0	1	0
ANO2	12	0	0	0	0	0	0
C12orf4	12	8	9	0	4	4	0
SCML1	X	3	5	0	1	1	0
WWC3	X	15	15	0	10	5	0
ARHGAP6	X	9	4	0	9	5	0
FAM184B	4	0	0	0	0	0	0
MAP4	3	192	147	0	143	116	0
GOPC	6	16	28	0	18	19	0
ROS1	6	0	0	0	0	0	0
USP28	11	60	48	0	36	31	0
HDAC9	7	17	16	0	13	9	0
TSPAN17	5	39	25	0	22	16	0
NOP16	5	15	15	0	10	7	0
CC2D2A	4	11	15	0	10	2	0
RRM2B	8	12	5	0	11	9	0
ZNF800	7	3	8	0	4	3	0
TNFRSF17	16	0	0	0	0	0	0
SNX29	16	3	2	0	3	1	0
LMO3	12	3	1	0	1	0	0
MRPS10	6	36	26	0	20	21	0
GUCA1A	6	1	1	0	0	2	0
RSF1	11	15	13	0	8	9	0
VPS13D	1	61	29	0	25	33	0
CELF2	10	46	40	0	27	20	0
FAM120A	9	39	47	0	27	16	0
R3HDM1	2	13	9	0	11	10	0
COL9A2	1	0	2	0	0	0	0
KITLG	12	17	17	0	17	11	0
ERCC8	5	6	10	0	7	6	0
ADAMTS6	5	2	8	0	2	3	0
H6PD	1	9	8	0	3	7	0
VAMP3	1	47	78	0	34	44	0
PER3	1	2	2	0	0	1	0
UTS2	1	0	0	0	0	0	0
TNFRSF9	1	0	2	0	0	0	0
EPN3	17	7	3	0	4	4	0
LTBP1	2	153	147	0	109	112	0
RCN1	11	169	141	2	134	112	2
ELN	7	126	113	0	99	75	0
RFC2	7	25	27	0	18	15	0
ARID1B	6	11	13	0	7	7	0
CLPTM1L	5	55	55	0	45	30	0
NEDD4L	18	19	14	0	34	6	0
FOXP3	X	0	0	0	0	0	0
PPP1R3F	X	11	11	0	9	11	0
HEXB	5	22	24	0	23	23	0
PTCD2	5	2	5	0	5	3	0
NEXMIF	X	3	0	0	0	0	0
JKAMP	14	25	18	0	27	20	0
DKK3	11	253	260	0	250	174	0
ARHGEF5	7	0	0	0	0	0	0
NFE2L3	7	3	1	0	1	1	0
MCUR1	6	65	47	0	45	27	0
LIMA1	12	17	16	0	14	9	0
LETMD1	12	12	26	0	15	27	0
SLC4A8	12	1	0	0	0	0	0
LAMC3	9	12	5	0	9	5	0
PTGER3	1	2	1	0	0	1	0
TNIP3	4	0	0	0	0	0	0
MAPK9	5	33	29	0	28	19	0
COL23A1	5	10	0	0	7	1	0
BCAR1	16	59	56	0	62	48	0
FAM160A2	11	13	1	1	8	5	1
HERPUD1	16	63	61	0	36	36	0
HOMER3	19	25	23	0	19	10	0
RAD51	15	13	7	0	6	5	0
POLQ	3	3	3	0	1	1	0
PIK3CB	3	11	8	0	7	7	0
CYBA	16	72	53	0	56	50	0
THOC3	5	11	7	0	9	6	0
HEBP2	6	97	89	0	66	58	0
MPHOSPH9	12	1	6	0	6	2	0
PLEKHA5	12	18	10	0	16	11	0
PRSS8	16	0	1	0	1	1	0
SIKE1	1	37	20	0	13	13	0
RRP12	10	9	11	0	5	7	0
FNIP2	4	7	3	0	4	7	0
MSMO1	4	67	44	0	53	36	0
TTC17	11	18	15	0	17	8	0
ALX4	11	0	0	0	0	0	0
FSTL4	5	0	0	0	0	0	0
FOXN3	14	30	15	1	17	8	1
METTL24	6	1	1	0	4	0	0
AKR7A2	1	68	41	0	53	29	0
MRTO4	1	19	17	0	8	8	0
NNAT	20	45	28	0	29	21	0
USE1	19	28	5	0	17	14	0
MCF2L2	3	0	0	0	0	1	0
NRIP2	12	0	0	0	0	0	0
LAMA3	18	0	0	0	1	3	0
AP5M1	14	13	27	0	28	25	0
ANAPC4	4	8	4	0	5	3	0
KCNQ1	11	9	20	0	12	4	0
TRAPPC3	1	49	48	0	73	43	0
THRAP3	1	28	22	0	18	17	0
PHPT1	9	340	326	0	307	252	0
ENTPD2	9	0	0	0	1	0	0
LY75	2	0	0	0	0	0	0
ARID4B	1	30	31	0	20	16	0
OPN3	1	5	7	0	10	3	0
SDCCAG8	1	14	6	0	14	3	0
PTPRN	2	2	0	0	0	0	0
HHAT	1	3	1	0	9	2	0
KIF1B	1	41	22	0	27	16	0
FOXC1	6	21	30	0	14	5	0
TBC1D22A	22	14	15	0	13	14	0
SYNE2	14	8	15	0	7	7	0
PLEKHH1	14	3	5	0	2	0	0
ATP9A	20	8	12	0	7	6	0
SPO11	20	0	0	0	0	0	0
CBLN4	20	0	0	0	0	0	0
CHRDL2	11	0	1	0	0	0	0
FAM168A	11	22	21	0	18	11	0
RELT	11	1	5	0	2	3	0
GALC	14	4	7	0	10	8	0
NOP58	2	20	14	0	13	10	0
SZRD1	1	96	93	0	76	61	0
KCNH2	7	106	99	0	75	51	0
CUL1	7	42	51	0	37	28	0
FAM114A2	5	11	13	0	7	9	0
CYFIP2	5	53	40	0	37	34	0
TAB2	6	39	38	0	42	26	0
GINM1	6	41	46	0	29	27	0
EIF2AK2	2	8	7	0	5	4	0
USP36	17	5	4	0	4	7	0
KMT2C	7	7	4	0	6	7	0
MCOLN3	1	0	0	0	0	0	0
CCDC85A	2	4	2	0	3	1	0
PUM2	2	34	24	0	20	14	0
MRPL43	10	63	48	1	44	47	1
ITIH4	3	0	0	0	0	0	0
ITIH1	3	0	0	0	0	0	0
HPF1	4	36	28	0	19	19	0
ZFR	5	39	42	0	45	25	0
ZNF280C	X	0	2	0	0	0	0
NPFFR2	4	0	0	0	0	0	0
PHF21B	22	0	1	0	0	0	0
TRAF1	9	1	0	0	2	0	0
RC3H2	9	22	17	0	13	14	0
IL17RB	3	0	1	0	0	0	0
TRAF3IP2	6	10	9	0	5	5	0
GYG2	X	25	10	0	8	11	0
DCBLD2	3	65	60	0	43	35	0
SERPINB3	18	0	0	0	0	0	0
SOAT1	1	10	7	0	11	5	0
PKP2	12	158	158	0	160	115	0
MSH4	1	0	0	0	0	0	0
F7	13	0	0	0	0	0	0
GDI2	10	182	144	0	159	145	0
PRDM1	6	0	0	0	0	0	0
ATG5	6	15	15	0	17	20	0
TMCC3	12	6	4	0	4	1	0
PITHD1	1	45	17	0	24	25	0
MTA3	2	27	17	0	20	18	0
USP13	3	17	24	0	12	14	0
ATP11B	3	11	11	0	16	8	0
LAMC2	1	2	0	0	1	0	0
CDK14	7	41	42	0	27	18	0
SEC61A1	3	125	103	0	88	53	0
PPP1R12A	12	34	20	0	22	19	0
RASGRF1	15	0	0	0	0	0	0
CAMK2B	7	6	3	0	4	1	0
CROCC	1	9	6	0	3	7	0
POLR3E	16	20	12	0	10	9	0
ATP2B4	1	117	85	0	84	75	0
ZC3H11A	1	32	37	0	11	16	0
RIOK2	5	11	8	0	13	6	0
YIPF1	1	18	12	0	14	16	0
NDC1	1	13	13	0	7	7	0
DGKG	3	0	1	0	0	0	0
FLYWCH1	16	11	9	0	5	4	0
UNKL	16	2	11	0	6	0	0
TBXAS1	7	0	2	0	3	0	0
PARP12	7	4	3	0	2	5	0
ALDH18A1	10	47	31	1	19	20	1
TARBP1	1	4	1	0	1	3	0
GATB	4	28	22	0	17	18	0
MXD1	2	10	2	0	4	2	0
CDK17	12	14	9	0	8	8	0
DNAJC25	9	8	10	0	10	4	0
SLC2A3	12	22	31	0	17	15	0
PSD	10	9	8	0	15	12	0
CTDP1	18	9	16	0	5	2	0
YBX3	12	193	170	0	102	85	0
STYK1	12	0	0	0	0	0	0
WNK1	12	49	27	0	32	22	0
RPS17P5	6	0	0	0	0	1	0
CCAR1	10	22	14	0	12	11	0
OGFR	20	29	29	0	19	14	0
GNA15	19	0	0	0	0	0	0
CREB3L3	19	0	0	0	0	0	0
PIGV	1	5	18	0	0	2	0
PTPRU	1	19	15	0	12	4	0
SNRNP40	1	17	17	0	14	8	0
RIMBP2	12	0	0	0	0	0	0
COL11A1	1	13	25	0	23	10	0
QSER1	11	8	15	0	8	2	0
MPC1	6	84	64	0	90	52	0
ACAA1	3	51	43	0	30	32	0
BCAT1	12	40	27	1	29	19	1
HDAC7	12	17	8	0	10	23	0
LZTS1	8	2	2	0	2	0	0
PRDM6	5	8	8	0	5	6	0
WNT8A	5	0	0	0	0	0	0
SPAG4	20	7	5	0	2	6	0
NCKAP1	2	89	82	0	70	62	0
MRPS35	12	51	44	0	34	31	0
GUCY1B1	4	15	15	0	18	10	0
SFSWAP	12	18	7	0	8	9	0
TNK2	3	6	11	0	4	11	0
MON2	12	21	9	0	8	7	0
CDH3	16	10	12	0	19	5	0
ARSF	X	0	0	0	0	0	0
GPBP1	5	20	19	0	18	13	0
DGAT2	11	5	6	0	5	2	0
ZNF112	19	3	3	0	1	3	0
CS	12	151	133	1	111	84	1
LTK	15	0	1	0	0	0	0
MRPS24	7	103	97	1	98	85	1
ELMO2	20	15	20	0	24	17	0
WAPL	10	14	19	0	17	12	0
VMP1	17	55	47	0	50	31	0
APPBP2	17	15	15	0	9	15	0
POLD1	19	18	15	0	10	10	0
SEZ6	17	0	0	0	0	0	0
EIF4B	12	198	189	0	161	126	0
SLC6A16	19	2	3	0	1	2	0
BICRA	19	4	1	0	5	1	0
SPHK2	19	7	3	0	6	2	0
RPL18	19	1320	1069	3	1004	872	3
CA11	19	15	6	0	4	4	0
ISOC2	19	78	79	0	70	62	0
U2AF2	19	53	38	1	29	25	1
EPN1	19	80	88	0	42	56	0
MED29	19	27	25	0	18	30	0
AHRR	5	1	0	0	0	0	0
GSC2	22	0	0	0	0	0	0
ZNF275	X	5	6	0	3	2	0
MTMR1	X	5	10	0	3	6	0
GPC1	2	162	126	0	131	92	0
ADCK1	14	12	4	0	5	3	0
HAGH	16	67	45	0	54	49	0
RNF4	4	40	39	0	34	23	0
CASP8	2	1	2	0	0	3	0
LIMCH1	4	18	16	0	13	23	0
INTS13	12	13	12	0	10	22	0
TM7SF3	12	23	29	0	28	19	0
DLX3	17	0	0	0	0	0	0
SPA17	11	4	6	0	5	5	0
TSPAN32	11	4	3	0	0	2	0
CCN5	20	0	0	0	0	0	0
DMRT3	9	0	0	0	0	0	0
ST3GAL6	3	29	20	0	30	17	0
ATP2C2	16	0	0	0	0	0	0
NGFR	17	31	26	0	31	20	0
CDON	11	2	8	0	1	3	0
TAF2	8	8	10	0	6	3	0
HIPK2	7	23	15	0	11	12	0
TNPO3	7	20	21	0	8	9	0
BORCS8-MEF2B	19	2	1	0	0	0	0
RFXANK	19	36	41	0	25	30	0
TMEM161A	19	21	13	0	21	17	0
LPAR2	19	1	2	0	0	1	0
CTSA	20	82	60	1	46	46	1
SUGP2	19	41	52	0	18	26	0
SLC12A2	5	6	8	0	1	2	0
SNX24	5	27	27	0	26	19	0
EYA2	20	0	0	0	0	0	0
CNN2	19	99	101	0	64	71	0
ABCA7	19	8	11	0	10	7	0
SNCAIP	5	13	15	0	6	13	0
DDX20	1	24	9	0	8	8	0
BTBD1	15	88	55	0	60	62	0
FAR2	12	2	5	0	1	4	0
BCAS1	20	0	0	0	0	0	0
POU1F1	3	0	0	0	0	0	0
CHI3L2	1	0	0	0	1	0	0
SBNO2	19	5	5	0	8	6	0
PMS1	2	6	5	0	9	5	0
HMG20B	19	44	62	0	43	44	0
CALCRL	2	4	2	0	2	0	0
TAF11	6	35	32	0	31	26	0
ANKS1A	6	10	16	0	12	10	0
AP3D1	19	52	62	0	33	21	0
ZNF76	6	13	13	0	14	7	0
SLC9A3R2	16	38	23	0	34	19	0
NTHL1	16	8	23	0	19	10	0
UHRF1BP1	6	15	9	0	8	7	0
GNAI3	1	43	26	0	24	32	0
IPO5	13	71	73	0	61	54	0
OAT	10	29	33	0	11	18	0
WDR3	1	7	13	0	7	6	0
PKN2	1	20	16	0	11	6	0
WDR18	19	54	57	0	55	41	0
TRAM2	6	10	4	0	9	4	0
NTN1	17	8	7	0	5	9	0
GLP2R	17	0	0	0	0	0	0
MCM10	10	6	0	0	4	4	0
DGKA	12	6	14	0	4	7	0
ERBB3	12	1	1	0	0	4	0
ROPN1	3	0	0	0	0	0	0
ANKRD44	2	0	1	0	3	2	0
KARS	16	90	85	0	67	54	0
ADAT1	16	4	6	0	1	4	0
PDIA5	3	29	22	0	20	15	0
TBC1D22B	6	10	5	0	3	5	0
NDUFB4	3	272	250	0	234	186	0
SPEN	1	13	6	0	5	5	0
MYLK	3	272	248	0	209	163	0
ZC3H15	2	25	33	0	29	27	0
MAP2K4	17	23	27	0	19	23	0
TMEM206	1	11	13	0	5	7	0
SNAP91	6	6	5	0	3	3	0
SLK	10	22	15	0	15	10	0
CYB5R4	6	9	6	0	5	3	0
COL17A1	10	0	0	0	0	0	0
GSTO2	10	1	0	0	1	0	0
SEC61A2	10	24	17	0	13	9	0
PRKCQ	10	0	0	0	0	0	0
TLE2	19	26	21	0	25	18	0
ASB1	2	22	17	0	18	15	0
FAM107B	10	25	15	0	18	10	0
ME1	6	20	11	0	3	7	0
TBC1D1	4	38	38	0	46	26	0
CDK13	7	16	13	0	10	11	0
MTHFD2	2	109	98	0	98	86	0
SLC9A7	X	3	4	0	2	3	0
FOXJ2	12	8	10	0	12	2	0
YBX1	1	1217	1060	1	899	742	1
AC011529.1	19	0	1	0	0	1	0
PPP2R5A	1	40	42	1	22	22	1
CTNNA2	2	0	0	0	1	0	0
ELAVL1	19	62	52	0	39	46	0
TIE1	1	2	0	0	0	0	0
DIP2B	12	17	26	0	11	13	0
SMARCD1	12	19	15	0	7	10	0
KDM4A	1	31	21	0	15	7	0
NFYC	1	50	42	0	30	41	0
ZMYND12	1	0	0	0	0	0	0
SLC9A3	5	9	6	0	4	5	0
NGEF	2	0	0	0	0	0	0
ASPM	1	8	9	0	5	6	0
CD84	1	0	0	0	0	0	0
ELOVL1	1	37	25	0	25	24	0
SPI1	11	0	0	0	0	0	0
ZNRD1	6	30	17	0	19	19	0
MPPED2	11	41	20	0	31	26	0
CLDN18	3	0	0	0	0	0	0
ZBTB11	3	4	9	0	3	6	0
ATXN3	14	11	4	0	7	3	0
GOLGA5	14	20	18	0	8	19	0
FGFR2	10	4	6	0	8	3	0
LRRC40	1	11	14	0	13	1	0
ISOC1	5	125	98	2	82	77	2
EML1	14	11	9	0	5	7	0
TRMT11	6	10	7	0	6	9	0
THUMPD1	16	12	6	0	6	8	0
MSANTD3	9	20	17	0	17	14	0
KIF26A	14	13	5	0	9	8	0
ATG2B	14	8	3	0	2	5	0
ARFGEF1	8	6	12	0	12	2	0
ACSM2B	16	0	0	0	0	1	0
ZFAT	8	2	3	0	0	0	0
MTFR1	8	7	6	0	7	8	0
STAG3	7	0	0	0	0	0	0
FECH	18	17	22	0	21	10	0
MYO9A	15	3	3	0	4	0	0
DDX3Y	Y	24	18	0	27	13	0
PFKP	10	436	375	1	318	299	1
IDI1	10	76	65	0	47	53	0
SP100	2	7	13	0	1	2	0
KLF6	10	36	26	0	20	18	0
PLPP1	5	71	44	0	48	46	0
NEO1	15	26	20	0	16	7	0
TRAM1	8	67	60	0	39	35	0
PHKA1	X	12	1	0	2	1	0
TNFRSF1A	12	24	33	0	26	15	0
CACNB1	17	15	16	0	11	6	0
EVI5	1	12	10	0	4	2	0
STOML1	15	10	4	0	13	6	0
PKM	15	832	712	0	610	522	0
DHX29	5	8	11	0	4	0	0
DNTTIP2	1	17	15	0	10	9	0
METTL22	16	11	6	0	9	5	0
TP53BP1	15	22	19	0	16	17	0
TRO	X	35	25	0	22	18	0
RRP15	1	18	10	0	15	7	0
RHOA	3	392	340	1	302	255	1
DHX8	17	16	6	0	9	4	0
PMS2P4	7	2	7	0	1	1	0
PRKCZ	1	14	16	0	12	16	0
ZFY	Y	10	9	0	5	12	0
IARS2	1	63	64	0	57	42	0
SYT1	12	2	3	0	2	1	0
NAV3	12	1	1	0	1	1	0
IDH3G	X	37	34	0	30	31	0
ROGDI	16	68	63	0	54	53	0
PDZD4	X	4	0	0	4	3	0
ATP2B3	X	0	0	0	0	0	0
ROCK1	18	21	12	0	9	16	0
CBFB	16	26	26	0	21	16	0
PDK3	X	14	4	0	6	9	0
HYAL2	3	43	32	0	37	22	0
HDAC4	2	2	2	0	3	2	0
RASSF1	3	8	5	0	11	6	0
FGFR3	4	0	1	0	2	1	0
IFI35	17	8	3	0	8	1	0
HEATR6	17	7	7	0	4	1	0
COASY	17	25	18	0	13	14	0
PLEKHH3	17	16	15	0	17	12	0
MEF2A	15	89	85	0	72	61	0
OTUD5	X	29	33	0	19	16	0
TFE3	X	12	18	0	12	6	0
TBC1D25	X	13	16	0	16	6	0
ACSL4	X	16	19	0	10	24	0
INPP5A	10	65	61	0	47	42	0
GPKOW	X	14	14	0	18	13	0
GRIPAP1	X	7	4	0	8	7	0
FTSJ1	X	24	24	0	19	11	0
PRR11	17	18	17	0	18	5	0
REEP1	2	19	21	0	13	10	0
ATP11A	13	33	25	0	25	15	0
POLR1A	2	6	10	0	1	2	0
LAPTM4A	2	263	224	0	187	141	0
TTC7A	2	4	5	0	3	1	0
IP6K2	3	27	23	0	21	20	0
STON1-GTF2A1L	2	0	1	0	1	2	0
SRBD1	2	7	2	0	2	1	0
KIF2A	5	22	19	0	10	9	0
RASGRP2	11	7	5	0	7	7	0
PSME4	2	20	12	0	10	11	0
IFT80	3	7	7	0	8	10	0
SIRT2	19	34	38	0	30	31	0
ERLEC1	2	36	28	0	27	27	0
PPP2R5B	11	9	11	0	6	9	0
PYGM	11	18	14	0	10	7	0
PAGE1	X	0	0	0	0	0	0
PITX1	5	0	1	0	0	2	0
TRPC7	5	0	0	0	0	0	0
MAST4	5	14	11	0	16	13	0
ADGRF5	6	3	2	0	0	0	0
SDK2	17	5	10	0	2	5	0
ADAM7	8	0	0	0	0	0	0
NUP133	1	31	20	0	19	12	0
NUCKS1	1	120	122	0	94	67	0
VPS35	16	92	69	1	74	46	1
DNAJA2	16	51	43	0	45	39	0
BCL3	19	12	3	0	6	2	0
KCNAB2	1	1	3	0	0	5	0
ABCC9	12	2	2	0	0	1	0
GAL	11	0	0	0	0	0	0
CLEC2D	12	2	3	0	4	2	0
FUNDC1	X	21	21	0	17	15	0
MAOB	X	2	1	0	3	1	0
RORA	15	5	2	0	0	1	0
DRD4	11	0	0	0	0	1	0
TGFBR3	1	4	5	0	7	2	0
PLA2G10	16	0	0	0	0	0	0
HES2	1	0	0	0	0	0	0
ATP1B3	3	71	65	0	45	52	0
NEDD4	15	8	3	0	5	3	0
PIGB	15	6	5	0	2	5	0
MAPK6	15	46	30	0	21	18	0
GNB5	15	27	29	0	19	15	0
RAB27A	15	5	3	0	1	6	0
HDHD5	22	38	36	0	27	35	0
UFD1	22	56	48	0	30	36	0
LRP6	12	10	14	0	8	6	0
GUCY2C	12	0	0	0	0	0	0
SCT	11	0	2	0	0	0	0
PHRF1	11	16	5	0	6	6	0
ELP1	9	19	17	0	29	28	0
NUCB2	11	43	28	0	19	21	0
PFN2	3	140	139	0	110	80	0
PTPN3	9	4	1	0	0	0	0
SPTB	14	19	26	0	12	10	0
DAPP1	4	1	0	0	2	0	0
FGF10	5	2	4	0	3	0	0
SLC44A1	9	16	12	0	12	13	0
TMEM260	14	3	4	0	2	1	0
SMG6	17	23	10	0	10	9	0
EXOC5	14	25	16	0	16	12	0
CLTCL1	22	2	0	0	1	1	0
FGF22	19	1	0	0	0	0	0
FSTL3	19	86	70	0	74	61	0
DGCR2	22	38	39	0	28	19	0
RNF126	19	37	27	0	28	21	0
MNT	17	4	11	0	3	3	0
ZXDC	3	3	9	0	6	5	0
JMJD6	17	14	19	0	11	9	0
POLB	8	30	26	0	20	19	0
ST6GALNAC1	17	0	0	0	0	0	0
WIPI1	17	41	45	0	33	34	0
FRMPD1	9	2	0	0	0	0	0
GBA2	9	41	25	0	22	21	0
NDST1	5	25	31	0	23	28	0
ASNS	7	67	54	0	66	34	0
AP3M2	8	9	7	0	7	8	0
CNGB1	16	0	0	0	0	0	0
ST6GALNAC2	17	0	0	0	0	0	0
CHAT	10	0	0	0	0	0	0
PABPC1	8	323	279	0	183	165	0
TESK2	1	0	3	0	1	0	0
CFAP20	16	61	56	0	49	45	0
CSNK2A2	16	22	19	0	26	16	0
AL162171.1	14	43	40	0	23	18	0
EIF2B3	1	8	21	0	20	18	0
CAMK2A	5	5	2	0	2	10	0
TCOF1	5	13	14	0	9	3	0
CDC42	1	157	137	0	94	66	0
OSBPL3	7	10	3	0	4	1	0
EPHA8	1	0	0	0	0	0	0
SLC12A3	16	0	0	0	1	1	0
RAD18	3	6	2	0	3	3	0
ATP2B1	12	8	7	0	7	7	0
TRPM5	11	0	0	0	0	0	0
NCK2	2	44	43	0	28	24	0
MAP4K4	2	104	91	0	95	63	0
MGAT4A	2	3	4	0	2	2	0
RPL31	2	2583	2305	3	2353	2018	3
WDR1	4	282	221	0	177	146	0
SNX13	7	10	12	0	7	9	0
AP001034.1	11	0	0	0	0	0	0
ARHGAP10	4	19	33	0	15	10	0
RPS6KA2	6	28	23	0	23	21	0
ING3	7	5	4	0	8	1	0
VASH1	14	76	68	0	53	51	0
LMCD1	3	77	60	0	45	48	0
BUD23	7	74	52	0	51	34	0
SEL1L	14	25	19	0	25	16	0
TRIP13	5	6	7	0	8	6	0
ATP6AP1	X	97	94	1	88	69	1
TCF3	19	61	42	0	32	55	0
TRIB2	2	23	19	0	18	13	0
DAZAP1	19	76	49	0	44	40	0
MBD3	19	76	59	0	51	35	0
PRLH	2	0	0	0	0	0	0
HLTF	3	20	18	0	9	13	0
FAM50A	X	75	77	0	64	55	0
FAM3A	X	70	60	0	44	33	0
CPSF1	8	43	34	0	28	20	0
MYO3B	2	0	0	0	0	0	0
CYBRD1	2	12	9	0	6	8	0
CDH19	18	0	0	0	0	0	0
PDCD2	6	45	46	0	38	27	0
SLC6A15	12	0	0	0	0	0	0
RDH11	14	46	43	0	29	31	0
PRKACA	19	82	71	0	62	46	0
ADGRL1	19	8	11	0	8	5	0
SPP2	2	0	0	0	0	0	0
ACTN1	14	310	253	0	169	149	0
ZFYVE26	14	9	4	0	0	2	0
RPS6KA6	X	3	2	0	2	3	0
EPN2	17	28	27	0	23	13	0
PTPN18	2	2	2	0	2	3	0
LIMS2	2	111	106	1	86	60	1
ASIC4	2	1	2	0	1	0	0
SPEG	2	76	51	0	65	48	0
LNX1	4	2	1	0	3	0	0
ALDH3A2	17	91	74	1	67	52	1
TFRC	3	81	78	0	69	49	0
SREBF1	17	11	14	0	14	12	0
TRPC5	X	0	0	0	0	0	0
AFF4	5	38	37	0	34	27	0
UBE2D1	10	20	18	0	10	15	0
MPP5	14	15	12	0	10	9	0
RHOBTB1	10	28	25	0	26	22	0
SMC1A	X	21	19	0	21	15	0
HSD17B10	X	83	74	0	86	61	0
MARK2	11	10	13	0	4	2	0
HMMR	5	13	5	0	14	8	0
CHFR	12	14	15	0	21	8	0
TRHDE	12	1	0	0	2	1	0
P4HA2	5	113	100	1	67	68	1
FCGR2B	1	0	0	0	0	0	0
NFATC3	16	8	6	0	7	13	0
TRNT1	3	9	5	0	5	7	0
ACADVL	17	113	99	0	77	69	0
STK10	5	5	9	0	4	9	0
FBXW11	5	54	43	0	45	34	0
ACAP1	17	6	4	0	5	3	0
CRMP1	4	49	55	0	36	33	0
EVC	4	2	5	0	1	2	0
DERL2	17	27	21	0	33	20	0
SIDT1	3	0	0	0	0	0	0
NDE1	16	16	11	0	6	4	0
MRVI1	11	7	5	0	4	2	0
TMEM38A	19	3	8	0	4	5	0
AP1M1	19	51	49	0	35	39	0
PVR	19	35	21	0	21	24	0
XRCC1	19	23	22	0	15	11	0
SCARB1	12	42	13	0	26	8	0
CYP2W1	7	0	0	0	0	0	0
MCM2	3	30	25	0	29	21	0
MOV10L1	22	1	0	0	0	2	0
PANX2	22	2	1	0	1	0	0
SELENOO	22	15	10	0	13	9	0
TP63	3	0	0	0	0	0	0
ALPK1	4	1	2	0	1	7	0
LLGL2	17	24	11	0	9	10	0
PDE8A	15	5	6	0	3	1	0
CLCN4	X	5	5	0	3	3	0
NLE1	17	14	9	0	8	7	0
SDHA	5	126	100	0	87	71	0
SMARCE1	17	97	100	0	65	55	0
FNDC8	17	0	0	0	0	0	0
GSDMB	17	1	2	0	2	0	0
KDM5A	12	8	6	0	9	4	0
ADAM11	17	18	19	0	23	9	0
PPP2R3A	3	30	19	0	25	25	0
FERMT2	14	82	83	0	69	50	0
ABCB11	2	1	0	0	1	0	0
DHRS9	2	154	122	0	103	103	0
CD5L	1	0	0	0	0	0	0
PTGS2	1	2	0	0	2	0	0
IGF2BP2	3	34	27	0	8	18	0
MAP3K13	3	12	10	0	11	12	0
ST6GAL1	3	62	63	0	52	46	0
TBX21	17	0	0	0	0	0	0
VDAC1P1	X	0	0	0	1	0	0
FRY	13	35	20	0	17	19	0
PICALM	11	69	75	0	60	53	0
NSF	17	18	12	0	13	13	0
GLI2	2	3	7	0	1	5	0
CLASP1	2	18	13	0	12	10	0
MRPS34	16	81	72	0	52	60	0
NOTCH3	19	35	27	0	34	22	0
CLNS1A	11	38	52	0	35	29	0
PPP2R2C	4	0	0	0	0	0	0
TEAD2	19	42	55	0	45	23	0
EED	11	15	13	0	10	7	0
CDHR2	5	0	0	0	0	0	0
SNCB	5	0	0	0	0	1	0
TSG101	11	60	64	0	62	38	0
NCBP3	17	26	12	0	13	10	0
ATP2A3	17	6	8	0	4	0	0
CA12	15	1	0	0	2	0	0
MGLL	3	2	2	0	0	0	0
NTN4	12	6	10	0	5	4	0
BCS1L	2	23	14	0	17	14	0
NUAK1	12	38	27	0	20	23	0
DPP8	15	13	7	0	6	11	0
SLC24A1	15	3	1	0	2	0	0
ZNF532	18	38	27	0	26	20	0
SCARF1	17	2	3	0	0	0	0
LMAN1	18	48	46	0	38	24	0
HACD3	15	47	44	0	31	22	0
IPCEF1	6	0	0	0	0	0	0
ZZEF1	17	11	9	0	2	2	0
NOX3	6	0	0	0	0	0	0
ENO1	1	897	824	0	765	652	0
SLC12A1	15	0	0	0	0	0	0
MYDGF	19	113	92	1	83	67	1
ANO8	19	7	10	0	5	7	0
TUBE1	6	7	15	0	8	10	0
ARHGEF10L	1	23	10	0	8	7	0
TXK	4	0	0	0	0	0	0
WSCD2	12	1	0	0	0	0	0
KCNQ2	20	7	7	0	13	5	0
TACR2	10	0	0	0	0	0	0
ACTR6	12	7	8	0	18	12	0
TIPIN	15	4	5	0	8	1	0
SRI	7	69	82	0	67	57	0
EIF4G3	1	39	22	0	16	14	0
NUP37	12	24	19	0	17	11	0
SEMA3A	7	8	4	0	5	2	0
GTSE1	22	11	6	0	3	5	0
SEMA3C	7	15	8	0	6	6	0
TTC38	22	14	14	0	6	4	0
ACAT1	11	57	37	0	37	39	0
GRAMD4	22	16	9	0	13	6	0
CELSR1	22	11	8	0	10	7	0
WNT8B	10	0	0	0	0	0	0
ZNF638	2	28	7	0	13	14	0
SLC25A40	7	7	9	0	6	1	0
TIMM21	18	28	18	0	24	14	0
ADD2	2	11	7	0	3	0	0
FGF4	11	0	0	0	0	0	0
RASAL2	1	23	15	0	9	10	0
VPS9D1	16	9	8	0	6	7	0
ZNF37A	10	1	1	0	0	0	0
MARK3	14	33	25	0	26	19	0
SLC25A3	12	829	684	0	674	535	0
FNDC3B	3	31	31	0	31	23	0
FOSL2	2	15	25	0	22	7	0
CACNG5	17	0	0	0	0	0	0
CACNG4	17	0	0	0	0	0	0
FRYL	4	9	11	0	4	5	0
TMEM131	2	11	16	0	4	6	0
FSCN1	7	179	134	0	128	99	0
ACTB	7	1051	928	0	675	648	0
MOCOS	18	2	7	0	6	5	0
PLD1	3	6	9	0	7	12	0
ATP12A	13	0	0	0	0	0	0
WDR62	19	7	2	0	1	8	0
DLG1	3	19	18	0	9	27	0
RAB7A	3	139	113	1	96	77	1
BCAP29	7	11	23	0	10	11	0
SEC31B	10	1	3	0	1	0	0
SART3	12	19	21	0	11	6	0
ARHGAP15	2	0	0	0	0	0	0
TUBA3D	2	0	0	0	1	1	0
PAX2	10	0	0	0	0	0	0
EXOSC7	3	27	14	0	23	16	0
KIFAP3	1	97	66	0	60	46	0
MKRN2	3	35	24	0	23	21	0
MCM6	2	37	42	0	25	26	0
REXO2	11	96	75	0	56	39	0
RBM7	11	19	25	0	13	17	0
RBMS2	12	12	17	0	9	7	0
BAZ2A	12	15	14	0	9	12	0
PTPN23	3	16	7	0	9	12	0
MLH1	3	38	46	0	36	22	0
UNG	12	29	18	0	17	14	0
FMO4	1	2	1	0	1	1	0
KLHL20	1	7	14	0	11	6	0
RGS11	16	2	0	0	0	0	0
SLC46A1	17	2	4	0	1	0	0
PLXNA2	1	15	16	0	7	11	0
SPAG5	17	14	11	0	12	7	0
ANKRD13A	12	15	7	0	9	12	0
TPD52	8	41	22	0	31	18	0
ACACB	12	5	11	0	4	3	0
TRAF4	17	50	39	1	26	31	1
PAG1	8	6	5	0	5	4	0
GPATCH1	19	4	5	0	2	1	0
ICAM3	19	2	7	0	2	3	0
NT5C2	10	64	61	0	50	24	0
AP002956.1	11	84	78	0	67	71	0
GPC4	X	24	13	0	24	13	0
MBNL3	X	0	0	0	0	0	0
CAMSAP3	19	4	0	0	0	0	0
RAP1GAP	1	0	4	0	3	3	0
XAB2	19	29	15	0	16	13	0
ARHGEF1	19	19	8	0	11	6	0
STXBP2	19	3	5	0	4	4	0
MAP2K7	19	23	11	0	5	13	0
NMRK2	19	35	39	0	29	32	0
DGKD	2	23	19	0	13	12	0
CTTNBP2	7	0	7	0	2	6	0
ACTL6B	7	0	0	0	0	0	0
RARB	3	11	21	0	12	10	0
TOP2B	3	52	58	0	48	39	0
TM9SF3	10	70	57	1	49	44	1
NFKB2	10	15	10	0	12	18	0
UBE2T	1	57	34	0	50	27	0
PPP1R12B	1	81	101	0	52	46	0
DNAJC10	2	35	27	0	25	21	0
GTF3C1	16	20	39	0	10	19	0
IL4R	16	4	8	0	5	2	0
USP33	1	26	23	0	18	7	0
PAK3	X	0	0	0	0	1	0
CAPN6	X	0	2	0	1	0	0
DCX	X	0	0	0	0	1	0
SNRPA	19	48	35	0	21	23	0
SPAG6	10	0	0	0	0	0	0
EXOSC5	19	13	17	0	9	16	0
DYNC1I2	2	71	65	0	58	37	0
APBB1IP	10	0	0	0	0	0	0
LRCH4	7	22	21	0	7	8	0
FAM76B	11	3	7	0	3	3	0
SIRT6	19	12	13	0	5	6	0
TYR	11	0	0	0	0	0	0
POLD3	11	5	5	0	2	4	0
ACTN2	1	712	614	1	511	472	1
CAPZB	1	175	164	0	124	112	0
GPR137B	1	11	6	0	5	6	0
NAALAD2	11	2	1	0	4	1	0
JADE1	4	15	12	0	9	12	0
SLC25A43	X	3	2	0	3	2	0
UBE2A	X	60	57	0	49	50	0
FGFR1	8	72	43	0	29	34	0
FKBP6	7	0	0	0	0	0	0
SMC1B	22	0	0	0	0	0	0
FBLN1	22	121	107	0	94	88	0
ITGA8	10	9	7	0	11	3	0
CST7	20	0	0	0	0	0	0
MAP2	2	7	10	0	4	3	0
PIAS2	18	10	11	0	8	8	0
AMPH	7	8	9	0	11	6	0
ARAF	X	21	22	0	18	15	0
MCCC1	3	26	14	0	13	19	0
LAMP3	3	0	0	0	0	1	0
FAP	2	7	5	0	6	2	0
NEBL	10	165	143	0	109	87	0
ACER3	11	7	7	0	2	3	0
UBE2K	4	46	43	0	53	43	0
PIK3C3	18	12	11	0	8	8	0
N4BP2	4	1	1	0	2	3	0
TIGAR	12	13	8	0	11	8	0
TULP3	12	12	9	0	3	9	0
SYNJ2	6	10	9	0	10	7	0
ADCY2	5	1	1	0	0	0	0
PPP2R5C	14	84	65	0	48	49	0
PMS2P1	7	18	21	0	13	11	0
RBFOX1	16	5	6	0	6	4	0
GNB1	1	197	175	0	143	126	0
HOXA9	7	0	0	0	0	0	0
EDN1	6	25	19	0	16	19	0
MLLT10	10	14	18	0	11	6	0
ZCWPW1	7	2	2	0	4	1	0
ADCYAP1R1	7	0	0	0	0	0	0
FGF20	8	0	0	0	0	0	0
P2RY10	X	0	0	0	0	0	0
ITM2A	X	5	3	0	5	3	0
NRDC	1	56	53	0	46	21	0
VDAC3	8	138	129	0	116	93	0
PCM1	8	19	30	0	23	12	0
TNRC6C	17	7	3	0	2	2	0
CBFA2T2	20	4	9	0	4	0	0
BRINP1	9	2	1	0	0	0	0
ITCH	20	11	4	0	9	3	0
PKD2L2	5	0	0	0	0	0	0
TP53INP2	20	23	21	0	26	15	0
SDF4	1	95	95	0	94	59	0
MYH7B	20	11	7	0	7	10	0
BPIFB2	20	0	0	0	0	0	0
TP73	1	0	1	0	0	0	0
TOLLIP	11	34	35	0	25	21	0
UBE2D4	7	18	17	0	8	8	0
CLUL1	18	4	1	0	2	0	0
RUNX1T1	8	6	14	0	10	9	0
CDH17	8	1	4	0	1	1	0
THOC1	18	10	6	0	3	3	0
FKBP7	2	19	15	0	17	16	0
OSBPL6	2	3	0	0	1	1	0
SLC1A3	5	29	22	0	21	16	0
XRCC5	2	164	150	0	120	111	0
LXN	3	15	8	0	15	11	0
SP140	2	0	0	0	0	0	0
MKNK1	1	2	6	0	3	11	0
TNS1	2	46	68	0	42	46	0
REXO1	19	8	9	0	8	2	0
SAR1A	10	57	60	0	45	48	0
CDC14A	1	1	11	0	2	0	0
RAPGEF3	12	3	0	0	4	2	0
CEACAM1	19	1	1	0	0	0	0
SENP1	12	5	6	0	3	5	0
DUSP13	10	0	0	0	0	0	0
CIC	19	21	23	0	12	13	0
LIPE	19	8	6	0	8	7	0
FDFT1	8	173	162	0	151	126	0
PAFAH1B3	19	58	54	0	40	31	0
OPHN1	X	10	10	0	7	4	0
AFM	4	0	0	0	0	0	0
KIF22	16	33	29	0	21	21	0
SCGN	6	0	0	0	0	0	0
CARMIL1	6	1	2	0	1	0	0
PGM1	1	125	76	0	93	77	0
DDX1	2	58	55	0	31	32	0
DNM2	19	43	44	0	49	33	0
EPB41L2	6	12	29	0	9	3	0
RIMS1	6	0	2	0	1	1	0
MOXD1	6	9	10	0	4	5	0
STX7	6	50	25	1	30	27	1
RABL2B	22	9	8	0	6	7	0
KEAP1	19	53	44	1	43	33	1
DDX43	6	0	0	0	0	0	0
PTPRH	19	0	1	0	2	0	0
DCT	13	1	0	0	0	0	0
SLC35C2	20	33	24	0	23	24	0
CRYBG3	3	7	9	0	2	4	0
EPHA6	3	0	0	0	1	0	0
SCTR	2	0	0	0	0	0	0
RFX3	9	0	0	0	2	1	0
RIF1	2	11	11	0	8	4	0
RAB21	12	42	45	0	35	29	0
SLC4A4	4	9	3	0	4	6	0
SMARCA2	9	16	17	1	18	21	1
RDH8	19	0	0	0	0	0	0
SESN1	6	18	11	0	9	5	0
MID2	X	3	1	0	2	0	0
PIH1D3	X	0	0	0	0	0	0
COL5A3	19	3	0	0	1	0	0
SRCAP	16	1	0	0	1	1	0
PUM3	9	7	8	0	5	9	0
CPB2	13	0	0	0	0	0	0
CHRNA3	15	1	6	0	1	0	0
KCNN2	5	6	11	0	10	3	0
CNOT4	7	10	9	0	7	3	0
PSEN1	14	28	28	0	16	16	0
CPOX	3	19	11	1	19	8	1
CLDND1	3	35	36	0	28	34	0
MOK	14	11	2	0	5	4	0
HSP90AA1	14	365	303	1	275	234	1
RBL1	20	1	3	0	4	1	0
DLGAP4	20	49	34	0	26	18	0
IGSF9B	11	13	14	0	12	8	0
CFHR2	1	0	0	0	0	0	0
CROCCP3	1	0	0	0	0	0	0
NDC80	18	17	8	0	14	6	0
AP4E1	15	9	4	0	9	5	0
RSBN1	1	7	4	0	1	4	0
MAGI3	1	8	3	0	3	3	0
CXCL2	4	0	0	0	0	1	0
AFP	4	5	4	0	6	3	0
COL4A4	2	0	1	0	1	0	0
TCF7	5	0	0	0	1	0	0
OSTM1	6	32	25	0	24	28	0
CDH7	18	0	0	0	0	0	0
IMPG2	3	0	0	0	0	0	0
PCNP	3	59	62	0	43	45	0
EXD2	14	9	13	0	4	7	0
ARG2	14	36	21	0	32	29	0
MEF2C	5	17	12	0	14	13	0
PTPRC	1	0	0	0	0	0	0
CACNA1S	1	0	0	0	0	1	0
PKP1	1	0	0	0	0	0	0
UBA5	3	19	20	0	21	14	0
STK17B	2	7	15	0	9	5	0
CDC14B	9	20	17	0	11	14	0
ZNF510	9	4	5	0	6	5	0
LRP2	2	1	1	0	3	3	0
ZNF506	19	15	9	0	3	5	0
JMJD4	1	13	14	0	13	12	0
DUSP12	1	13	13	0	13	9	0
AACS	12	20	19	0	12	9	0
DELE1	5	43	27	0	26	21	0
SLC13A1	7	0	0	0	0	0	0
CADPS2	7	15	12	0	9	6	0
PCDHB4	5	0	0	0	1	1	0
PCDHA6	5	2	5	0	4	2	0
PCDHGA2	5	0	0	0	0	0	0
HSPB11	1	27	22	0	29	23	0
PHLPP1	18	4	4	0	1	2	0
ATP8B1	18	2	1	0	3	3	0
IL12RB2	1	0	0	0	0	1	0
SMARCD3	7	135	128	0	92	81	0
WDR70	5	12	7	0	3	8	0
FYB1	5	0	0	0	0	0	0
MPP4	2	0	0	0	0	0	0
STRADB	2	20	19	0	21	18	0
BZW1	2	102	71	0	68	74	0
PGR	11	0	0	0	0	0	0
C1QTNF3	5	9	16	0	8	14	0
ME2	18	15	22	0	20	19	0
C5orf22	5	12	8	0	8	7	0
CCNT2	2	19	15	0	8	9	0
FAM135A	6	4	2	0	4	1	0
COL19A1	6	1	2	0	0	0	0
EPB41L3	18	35	27	0	34	23	0
COBLL1	2	3	6	0	1	2	0
DLG3	X	14	7	0	13	10	0
KCNK2	1	1	0	0	0	0	0
SERTAD4	1	2	7	0	7	8	0
TRAF5	1	7	6	0	4	6	0
MRPL22	5	63	46	0	62	34	0
GEMIN5	5	9	6	0	7	6	0
OPRK1	8	1	0	0	0	0	0
NFE2L1	17	168	124	1	106	81	1
SEMA5B	3	5	6	0	13	5	0
GSK3B	3	23	21	0	11	15	0
ITGB5	3	126	118	0	110	87	0
ERC1	12	24	19	0	17	13	0
XPO1	2	59	80	0	49	63	0
LINC01587	4	0	0	0	0	0	0
RNF13	3	10	25	0	15	5	0
TRPM3	9	0	1	0	1	0	0
PALB2	16	5	2	0	3	1	0
DOP1A	6	5	5	0	1	3	0
LYRM2	6	17	9	0	14	2	0
BCKDHB	6	7	14	0	7	5	0
KAT6A	8	16	10	0	6	8	0
TUT7	9	4	2	0	3	1	0
ULK2	17	17	15	0	11	4	0
GRHL2	8	0	0	0	0	0	0
TNPO1	5	28	42	0	34	24	0
PLOD1	1	181	148	0	121	116	0
P2RX5	17	0	0	0	1	0	0
ITGAE	17	28	15	0	21	23	0
DIS3	13	11	14	0	10	13	0
PIBF1	13	8	6	0	0	1	0
TDRD3	13	7	12	0	1	5	0
AC000061.1	7	0	0	0	0	0	0
NUFIP1	13	6	4	0	6	1	0
PDS5B	13	11	5	0	7	5	0
OXCT1	5	64	62	0	61	44	0
RRAGB	X	9	5	0	8	6	0
EPYC	12	0	0	0	0	0	0
CYLD	16	9	9	0	9	2	0
SLC27A5	19	9	8	0	11	15	0
ZNF324	19	6	4	0	0	3	0
ZNF671	19	9	6	0	3	6	0
ZNF416	19	3	1	0	1	0	0
ZNF586	19	1	5	0	1	2	0
ZNF446	19	12	3	0	4	7	0
ZNF264	19	5	4	0	3	3	0
RPS5	19	1091	968	1	843	784	1
FAT1	4	25	36	0	21	16	0
YTHDC1	4	29	14	0	15	15	0
CHMP2B	3	23	24	0	12	20	0
SMAP2	1	20	7	0	9	10	0
PPIE	1	26	26	0	28	25	0
ZMPSTE24	1	11	15	0	11	13	0
STARD7	2	76	61	0	67	46	0
NOA1	4	25	18	0	11	10	0
REST	4	21	13	0	14	6	0
HAL	12	0	0	0	0	0	0
SSH1	12	24	17	0	14	21	0
GSTP1	11	785	717	1	608	550	1
APLP2	11	232	221	0	211	164	0
FAM234B	12	2	2	0	1	0	0
SLCO1A2	12	0	0	0	0	0	0
WBP11	12	45	44	1	31	44	1
EIF3I	1	152	124	0	110	95	0
NKAIN1	1	0	1	0	0	0	0
COL16A1	1	57	53	0	42	30	0
TXLNA	1	10	13	0	7	3	0
APOB	2	1	0	0	0	0	0
NCOA1	2	10	14	0	8	4	0
AGBL5	2	17	20	0	14	11	0
EFR3B	2	3	1	0	2	3	0
KIF3C	2	11	12	0	7	12	0
RAB10	2	65	80	1	47	61	1
GCKR	2	0	0	0	0	0	0
HADHA	2	162	151	0	129	100	0
MAPRE3	2	26	16	0	18	12	0
CAD	2	8	14	0	12	9	0
CD59	11	162	137	0	137	114	0
CD82	11	3	3	0	5	5	0
BCORL1	X	7	3	0	2	1	0
ATRX	X	15	11	0	10	9	0
AK6	5	16	27	0	25	18	0
FCN1	9	0	0	0	0	0	0
MYNN	3	11	4	0	16	10	0
MECOM	3	10	5	0	4	1	0
SCAMP1	5	26	22	0	12	19	0
PREP	6	40	44	0	35	28	0
HACE1	6	5	6	0	5	5	0
SEH1L	18	20	12	0	16	7	0
WDR47	1	11	7	0	6	5	0
WDFY1	2	17	21	0	13	11	0
OVGP1	1	0	2	0	0	1	0
SLC25A24	1	26	23	0	13	16	0
MAP3K4	6	11	4	0	5	8	0
PILRA	7	0	0	0	0	0	0
IGSF9	1	6	2	0	6	0	0
ABCB1	7	0	0	0	0	0	0
ZNF213	16	12	10	0	7	9	0
AKR1B1	7	403	344	0	359	298	0
CPNE3	8	37	26	0	23	22	0
RRN3	16	20	16	0	15	13	0
CTTN	11	31	35	0	30	27	0
WNT11	11	15	14	0	11	6	0
MTIF2	2	14	11	0	12	9	0
DDHD2	8	14	20	1	10	8	1
TTC39A	1	4	1	0	3	3	0
EPS15	1	44	34	0	32	33	0
ORC1	1	7	2	0	2	0	0
MGST2	4	106	96	0	83	108	0
CHERP	19	14	16	0	14	7	0
ATG16L1	2	9	9	0	10	6	0
USP40	2	5	9	0	9	3	0
POMGNT1	1	70	57	0	42	62	0
RAD54L	1	2	5	0	1	0	0
MAST2	1	17	18	0	11	13	0
DNAJA1	9	133	99	0	99	98	0
B4GALT1	9	21	14	0	15	13	0
CHMP5	9	101	71	0	72	41	0
NFX1	9	21	25	0	13	13	0
AQP6	12	0	0	0	0	0	0
DIMT1	5	19	17	0	18	9	0
IPO11	5	7	5	0	10	6	0
FOLH1	11	4	3	0	3	2	0
EIF2AK1	7	54	59	0	42	44	0
NME8	7	0	0	0	0	0	0
EPDR1	7	35	17	0	15	19	0
SNX10	7	1	0	0	1	0	0
SEPHS1	10	55	44	0	25	33	0
MRPL28	16	91	71	0	73	51	0
HBQ1	16	0	0	0	1	0	0
ITPKC	19	14	10	0	6	7	0
CEACAM6	19	0	0	0	0	0	0
FAT2	5	0	0	0	0	0	0
RBM22	5	21	26	0	21	23	0
TMED2	12	139	124	0	107	101	0
ERO1B	1	2	2	0	3	2	0
ZFAND6	15	76	87	0	80	59	0
HSD17B2	16	0	0	0	1	1	0
TXLNG	X	4	3	0	4	4	0
PPEF1	X	0	0	0	0	0	0
LAT2	7	0	0	0	0	0	0
HUWE1	X	47	54	0	28	39	0
ZW10	11	11	14	0	3	5	0
ALG9	11	21	23	0	22	10	0
MYBPC2	19	1	0	0	0	0	0
NOX4	11	4	5	0	7	3	0
ACOX3	4	26	20	0	10	13	0
MTMR2	11	18	17	0	11	8	0
PPP1R15A	19	52	38	0	33	33	0
HSD17B14	19	8	3	0	1	1	0
TRIP6	7	43	26	0	44	29	0
ACHE	7	2	1	0	0	2	0
FTL	19	1390	1251	3	1176	956	3
SRRT	7	33	22	0	19	16	0
BAX	19	105	79	0	75	57	0
NLK	17	17	10	0	8	8	0
PIGS	17	70	59	0	36	33	0
ADAMTS2	5	11	10	0	8	7	0
TMPRSS11E	4	0	0	0	0	0	0
ATXN7L3	17	33	38	0	31	20	0
PGS1	17	15	12	0	8	10	0
PSMC5	17	92	88	0	93	70	0
UIMC1	5	14	22	1	20	16	1
CETP	16	0	0	0	0	0	0
MMP2	16	249	203	0	174	153	0
MT3	16	1	1	0	1	2	0
LPCAT2	16	11	10	0	12	6	0
GNAO1	16	1	0	0	3	3	0
OGFOD1	16	24	16	0	12	14	0
SH3BP2	4	6	7	0	3	5	0
NOP14	4	12	10	0	10	13	0
ADD1	4	98	102	0	64	44	0
L2HGDH	14	6	4	0	2	2	0
TXNDC16	14	2	1	0	1	2	0
RTRAF	14	198	173	0	166	141	0
NID2	14	37	31	0	33	31	0
GMCL1	2	8	7	0	6	4	0
SF3B2	11	76	76	0	61	45	0
KLHL42	12	11	10	0	2	5	0
GNAS	20	1504	1290	2	1081	946	2
DNM1L	12	26	20	0	25	17	0
PTHLH	12	0	1	0	0	3	0
PHACTR3	20	6	5	0	4	5	0
ERGIC2	12	33	16	0	23	28	0
TFAP2C	20	0	0	0	0	0	0
AURKA	20	34	24	0	20	9	0
CASS4	20	0	0	0	0	0	0
PIR	X	12	7	0	5	0	0
AAMDC	11	72	41	0	47	42	0
RFX2	19	1	1	0	0	4	0
METTL2A	17	17	19	1	14	17	1
SULT2B1	19	0	0	0	0	0	0
ALG6	1	1	5	0	4	4	0
CNOT3	19	20	26	0	15	9	0
GP6	19	0	0	0	0	0	0
PTPN4	2	4	12	0	6	3	0
DDX18	2	31	24	0	24	20	0
KHSRP	19	53	59	0	40	30	0
GNA11	19	30	28	0	17	25	0
ASAP3	1	19	18	0	17	9	0
EDEM2	20	8	12	0	8	14	0
DNMT3B	20	2	1	0	0	4	0
REM1	20	0	0	0	0	0	0
TPX2	20	29	28	0	20	15	0
FER1L4	20	0	0	0	0	0	0
PDRG1	20	27	37	0	25	27	0
EPB41L1	20	20	10	0	7	10	0
SLC15A1	13	0	0	0	0	0	0
DOCK9	13	6	4	0	2	2	0
ANKRD10	13	32	21	0	27	14	0
TGDS	13	6	2	0	4	3	0
DOCK3	3	0	0	0	0	0	0
C3orf18	3	9	9	0	5	7	0
COQ9	16	50	38	0	39	29	0
TMEM40	3	4	1	0	2	1	0
KIF9	3	11	5	0	13	4	0
ARHGAP28	18	4	2	0	2	4	0
CRLS1	20	84	91	0	80	61	0
DEFB127	20	0	0	0	0	0	0
PPP1R13B	14	20	18	0	15	9	0
ATRN	20	21	22	0	20	13	0
SMOX	20	3	11	0	4	2	0
SIGLEC1	20	0	0	0	0	0	0
FKBP1A	20	218	182	0	203	143	0
NSFL1C	20	47	43	0	34	28	0
SLC4A11	20	0	0	0	0	0	0
C20orf194	20	16	8	0	13	11	0
ZNF343	20	4	4	0	2	4	0
EBF4	20	7	6	0	4	3	0
CPXM1	20	15	21	0	20	17	0
MAVS	20	10	27	0	7	12	0
LZTS3	20	11	7	0	11	3	0
F11	4	0	0	0	0	0	0
XRN2	20	28	40	0	26	37	0
KIZ	20	13	5	0	10	6	0
DYNLL1	12	532	452	1	492	423	1
TESC	12	24	20	0	15	21	0
SNX5	20	47	38	0	45	44	0
RPL6	12	1318	1091	1	1053	884	1
SIRPG	20	0	0	0	0	0	0
MAPKAPK5	12	21	25	0	15	11	0
P2RX7	12	0	0	0	0	0	0
ESF1	20	2	3	0	2	4	0
RBBP9	20	3	5	0	9	3	0
ANAPC5	12	55	71	0	47	27	0
SLC23A2	20	7	5	0	6	3	0
SLC8B1	12	1	1	0	2	0	0
TMEM230	20	98	77	1	63	73	1
DZANK1	20	0	0	0	0	0	0
KDM2B	12	11	13	0	10	10	0
CFAP61	20	0	0	0	0	0	0
LHX5	12	0	0	0	0	0	0
TASP1	20	2	3	0	5	4	0
OAS1	12	0	0	0	0	0	0
GCN1	12	15	15	0	12	15	0
RPLP0	12	2446	2167	5	1871	1647	5
PXN	12	38	36	0	35	19	0
SIRT4	12	2	5	0	2	3	0
RPH3A	12	0	0	0	0	0	0
KIF16B	20	3	3	0	3	1	0
TRMT6	20	8	8	0	4	3	0
CHGB	20	1	0	0	0	0	0
PEBP1	12	192	188	0	147	154	0
TBX5	12	49	29	0	24	24	0
BRAP	12	9	7	0	7	7	0
ERP29	12	96	95	0	60	74	0
NOS1	12	0	0	0	0	0	0
FUS	16	129	120	1	92	69	1
IGBP1	X	86	48	0	42	41	0
FXYD5	19	51	40	0	31	30	0
ZNF302	19	13	26	0	12	8	0
GRAMD1A	19	50	42	0	34	41	0
FXYD3	19	0	3	0	0	1	0
HEPH	X	119	108	0	86	94	0
CDIP1	16	54	48	0	29	37	0
CMTM1	16	1	1	0	2	1	0
KCNH4	17	0	0	0	0	0	0
GANAB	11	135	132	0	93	88	0
GMIP	19	5	4	0	6	1	0
RBM41	X	1	1	0	4	1	0
BIRC5	17	45	54	0	27	39	0
LAG3	12	0	0	0	0	0	0
MLF2	12	161	131	0	130	109	0
OTUB2	14	3	3	0	1	2	0
DDX24	14	69	72	0	67	48	0
ZBTB25	14	8	8	1	5	5	1
NECAP1	12	19	8	0	15	14	0
ARHGAP4	X	0	0	0	1	2	0
ANKRD24	19	0	0	0	0	0	0
DHX32	10	20	16	0	10	14	0
RCOR1	14	20	14	0	8	15	0
GPATCH2L	14	12	17	0	6	2	0
LTBP4	19	79	87	0	45	67	0
BLVRB	19	40	31	0	41	37	0
SLC9A1	1	8	4	0	4	2	0
SPTLC1	9	24	32	0	18	18	0
PAPOLA	14	78	81	0	66	58	0
CCNK	14	24	23	0	16	19	0
PCBP4	3	62	60	0	51	38	0
RGS1	1	0	0	0	0	0	0
YPEL3	16	35	30	0	31	15	0
MRPS33	7	45	43	0	43	43	0
NDUFB2	7	324	307	1	324	235	1
NUDC	1	80	78	0	53	58	0
MAEA	4	30	38	0	27	19	0
ICAM1	19	7	2	0	4	3	0
STRN4	19	81	75	0	60	39	0
IRAK3	12	0	2	0	1	0	0
LYZ	12	0	0	0	0	0	0
SI	3	0	0	0	0	0	0
MUL1	1	34	18	0	16	17	0
TFAP4	16	2	3	0	4	1	0
PDCD7	15	16	6	0	5	4	0
SPG21	15	55	47	0	35	29	0
FETUB	3	0	0	0	0	0	0
DNAJB11	3	42	42	0	55	30	0
P3H2	3	11	17	0	16	14	0
THPO	3	0	0	0	0	0	0
CHRD	3	0	0	0	0	0	0
FLT3LG	19	1	2	0	0	1	0
RAB11FIP3	16	23	19	0	23	18	0
GNPTG	16	17	25	0	17	21	0
ZNF268	12	3	3	0	3	4	0
GOLGA3	12	19	13	0	5	8	0
PABPC4	1	99	69	0	75	59	0
CD209	19	0	0	0	0	0	0
CERS4	19	9	17	0	14	8	0
MCOLN1	19	6	9	0	4	5	0
USP48	1	31	25	0	14	20	0
EFNB1	X	66	51	1	46	36	1
PDPR	16	18	6	0	9	10	0
AARS	16	56	48	0	34	33	0
GLG1	16	56	45	0	45	31	0
KIF4A	X	12	6	0	8	8	0
TNRC6A	16	7	5	0	8	14	0
PLEKHG2	19	9	9	0	8	10	0
DLL3	19	2	1	0	2	1	0
NAT14	19	56	68	0	32	29	0
PITPNM2	12	5	0	0	1	0	0
EXOC1	4	17	15	0	11	11	0
RBM27	5	9	8	0	9	4	0
POU4F3	5	0	0	0	0	0	0
OSBPL8	12	17	10	0	13	12	0
DTX2	7	3	1	0	5	4	0
NLRC4	2	0	0	0	0	0	0
PUS7	7	2	4	0	3	0	0
LAMB4	7	2	0	0	0	0	0
NRCAM	7	0	1	0	0	0	0
LAMB1	7	133	114	0	92	59	0
SLC26A4	7	0	0	0	0	0	0
SLC26A3	7	0	0	0	0	0	0
DLD	7	71	84	0	70	50	0
WDR7	18	4	6	0	0	2	0
TXNL1	18	78	53	0	54	68	0
IL5RA	3	0	0	0	0	0	0
ABCC6	16	1	0	0	1	1	0
CMTM6	3	28	13	0	13	13	0
ITGA6	2	9	7	0	4	2	0
RAPGEF4	2	2	1	0	3	2	0
MAP3K20	2	76	70	0	54	35	0
SMPX	X	465	397	2	412	347	2
FH	1	138	112	0	88	71	0
SEL1L3	4	14	21	0	14	15	0
TF	3	0	0	0	0	0	0
CDV3	3	121	67	0	88	84	0
MYO15A	17	0	0	0	0	0	0
ALKBH5	17	56	37	0	49	54	0
APOH	17	0	0	0	0	0	0
NLRP1	17	1	0	0	0	0	0
PITPNM3	17	0	1	0	2	1	0
SPAG7	17	123	83	0	70	66	0
ORC6	16	27	24	0	17	13	0
ZFHX4	8	1	3	0	3	2	0
SLC17A6	11	0	0	0	0	0	0
CPA1	7	0	0	0	0	0	0
ZC3HC1	7	13	15	0	13	18	0
ESR1	6	0	0	0	0	0	0
RGS17	6	0	0	0	0	0	0
ANGPT2	8	0	0	0	0	0	0
TMEM101	17	30	32	0	17	14	0
CD200	3	12	11	0	12	9	0
CCDC80	3	168	135	0	63	59	0
CMA1	14	0	0	0	0	0	0
PSME1	14	126	132	0	135	113	0
PPP2R3C	14	34	26	0	37	24	0
HAUS4	14	19	22	0	18	15	0
JPH4	14	2	3	0	2	0	0
MYH7	14	2522	2194	2	1549	1310	2
CEBPE	14	0	0	0	0	0	0
SLC7A8	14	4	2	0	1	3	0
OSGEP	14	11	20	0	12	13	0
SLC22A17	14	60	43	0	48	42	0
RNF31	14	11	19	0	11	5	0
SCFD1	14	43	24	0	25	20	0
G2E3	14	13	10	0	5	3	0
HECTD1	14	28	25	0	13	20	0
HNRNPC	14	331	298	0	241	195	0
RPGRIP1	14	0	0	0	0	0	0
SUPT16H	14	28	34	0	25	25	0
TOX4	14	21	31	0	21	18	0
GEMIN2	14	10	10	0	9	9	0
TGM1	14	0	0	0	0	1	0
TINF2	14	18	11	0	15	9	0
DAZL	3	0	0	0	0	0	0
TBL1Y	Y	0	0	0	0	0	0
SEMA6A	5	3	2	0	3	1	0
TRPM7	15	6	8	0	3	1	0
TYRO3	15	21	7	0	14	7	0
WDR76	15	12	7	0	12	5	0
CAPN3	15	3	4	0	7	2	0
SNAP23	15	50	32	0	33	13	0
TBX15	1	0	0	0	0	0	0
PHGDH	1	151	149	0	111	89	0
COL9A3	20	16	14	0	12	11	0
EZR	6	179	129	0	127	121	0
MYL6	12	1497	1311	2	1320	1106	2
AGO1	1	13	10	0	9	7	0
TEKT2	1	0	0	0	0	2	0
CLSPN	1	3	7	0	1	2	0
RFFL	17	5	2	0	4	2	0
UNC13D	17	16	11	1	1	6	1
MFSD11	17	32	15	0	21	10	0
DPYSL2	8	23	18	0	13	26	0
TGFB2	1	46	40	0	24	26	0
GPATCH2	1	5	2	0	5	6	0
NUP50	22	10	14	0	5	7	0
CDC45	22	16	12	0	12	3	0
COMT	22	16	18	0	8	8	0
ADA2	22	0	0	0	0	0	0
AC016026.1	22	0	0	0	0	0	0
VNN3	6	0	0	0	0	0	0
ECHDC1	6	41	34	0	32	22	0
LRRFIP2	3	24	40	0	33	23	0
[truncated: 59,542 more rows]

## Sheet: Supplementary_Table_6
logFC	logCPM	F	PValue	FDR	ID
10.9690577994261	7.6143630249809	455.920077433595	6.18462861490258e-19	4.65888073560612e-15	MT-TS2
-1.56074210578956	10.1855537060201	117.623451000451	7.94351529015074e-14	2.99192503403528e-10	MT-ND1
-0.752704030418535	14.2667750864385	38.1431860135432	2.10881829565097e-07	0.000489199361536197	MT-RNR2
-1.44265708171768	6.30106493613841	37.3748966078702	2.59763367336358e-07	0.000489199361536197	PCCB
-0.684999837604626	13.2007969994207	29.8889654553765	2.22843341013832e-06	0.00335735777571439	MT-CO3
1.47522310100075	5.16983793567153	16.5243277537695	0.000203009169686589	0.254878012541513	SCARB1
-1.69249931720144	4.70624088994935	15.7714570975386	0.000270656315977342	0.259246524875325	HPS6
-2.93008634509931	3.92505691006085	15.7271063523943	0.000275318226337794	0.259246524875325	MT-TG
1.56595119732007	4.94847924586527	14.8639482899528	0.000385057181874399	0.322292861228872	R3HDM2
-2.43715815651437	4.03167191747491	14.1188173949549	0.000516907114919202	0.389386129668635	ADNP2
1.68147098070909	4.69915134165059	13.6275497312759	0.000629282765954298	0.430944279630339	TTTY14
2.379102144774	4.0414167607033	12.740953243274	0.000902340881619185	0.566444488436443	SLC22A5
-1.5083654962272	4.59757516590707	12.498067276561	0.000997229248820905	0.577855994720606	PSD3
1.53070001075575	4.60657255118664	11.4953756325233	0.00151584776976107	0.815634374972151	CEP104
-0.781121937547676	6.31410587366252	11.3315450418144	0.00162472551076793	0.815937151507654	VAMP3
1.33526864021068	5.17091383752662	11.2015001162343	0.00192956994327608	0.856823118477675	SCRIB
-1.57907683706824	4.38694572693017	10.7210361842507	0.00210909579582456	0.856823118477675	HSD17B8
1.00828161455951	5.49333359795134	10.6585507415743	0.00216665818745065	0.856823118477675	CSTF3
1.40889134411207	4.69621345553487	10.5955643884702	0.00222636655758717	0.856823118477675	TGIF1
1.68093463520793	4.3686067849848	10.4336623706015	0.00238797292498184	0.856823118477675	SLC11A2
-1.14296895540824	5.17326772422636	10.4330618803373	0.00238859491411538	0.856823118477675	GTF3C1
1.86417682092228	4.23628217446795	10.2562329644805	0.00257943037404597	0.858149919104865	EHBP1L1
-1.37673695628647	4.59081992880851	10.126933264413	0.00272915311167653	0.858149919104865	MAVS
-1.1726119117499	5.06967998256852	10.0644136363369	0.00280482254404571	0.858149919104865	LETMD1
1.74518071453364	4.30245321222921	10.0295599115006	0.00284796866820943	0.858149919104865	GRB10
0.613778886261201	6.91386859557031	9.82534050803696	0.00311531486191216	0.902602571337857	ASPH
-1.30876018345054	4.67881605508778	9.72401726643967	0.00325770980443263	0.908901035436704	REEP4
-1.07743580212096	5.13774436497444	9.62865650582767	0.00339803540965821	0.914192883605546	UCK2
1.26041848768522	4.88820246977001	9.42406373550801	0.00372117150871078	0.957138513913286	PLCE1
-0.751977485197394	6.11512675889182	9.31470598769304	0.00390711262678147	0.957138513913286	DCAF11
0.624548677406085	6.70663804691054	9.29659749456721	0.00393884162104233	0.957138513913286	RSU1
1.24448441386969	4.74898636070912	9.13876289850494	0.00422724634876531	0.995120210789033	CDK5RAP2
-1.41898025101956	4.37531033926451	9.03976627194673	0.00441950682852972	0.999140526205432	SNX15
-0.734177808622504	6.48041761402592	9.0746296377084	0.00473189515241008	0.999140526205432	SSBP3
1.20232578099181	4.78880959015066	8.83604685463978	0.00484495667419666	0.999140526205432	PPM1F
-1.19607915662396	4.68992167188798	8.53256005091381	0.00556131647102816	0.999140526205432	NFIL3
-0.608412010040005	6.62101922445542	8.47880355607289	0.00569953406728216	0.999140526205432	XPO1
-1.08713772292045	5.0177312789879	8.45360855750338	0.0057655671368369	0.999140526205432	TAF12
-0.831984766399272	5.61998905208563	8.37564954345113	0.00597508979490521	0.999140526205432	BMP4
-0.896500298640599	5.68192980765033	8.37011898009865	0.00631256914994938	0.999140526205432	ADGRB2
-1.19991290462989	4.62496187326141	8.19819289027394	0.00648280729345609	0.999140526205432	DDIT3
-1.33802724456608	4.41109916858012	8.18962698951223	0.00650844785039391	0.999140526205432	NOD1
1.22777286094008	4.93107946524639	8.25617452548805	0.00666933867284887	0.999140526205432	NEDD4L
-0.778033343988607	5.8578112456731	7.98186308237803	0.00716457962506835	0.999140526205432	PITX2
1.35884337988336	4.38589720584117	7.96043438895336	0.00723615168028769	0.999140526205432	DEDD2
1.10572367384047	4.9164050776614	7.94847376016311	0.00727643090783834	0.999140526205432	ESYT2
0.920724092280519	5.4830895930151	7.93212677986732	0.00733186827970919	0.999140526205432	UNC5B
1.11134271811208	4.87250154075085	7.82511816920158	0.00770605602593025	0.999140526205432	PLAT
-0.856278359803761	5.4524642360201	7.80312448844223	0.00778545329152883	0.999140526205432	ZNF787
0.642440396431445	6.37979683317771	7.74314135819648	0.00800645377535978	0.999140526205432	CACYBP
-1.12189646636375	4.709950766311	7.64740077284129	0.00837315852279363	0.999140526205432	RAVER2
1.5463187270664	4.16599066860264	7.48135417726547	0.00905225857538732	0.999140526205432	ELF1
-0.760563151620313	5.73251219041715	7.41209395157923	0.00935266518181077	0.999140526205432	PPIL3
0.663611889469061	6.52577539432554	7.46219748994673	0.00971539049837394	0.999140526205432	MIR100HG
-0.737672914508061	5.75634123764386	7.25894531937033	0.0100553425567916	0.999140526205432	SMIM7
1.27424390496598	4.43992546039699	7.16062108246925	0.0105360229617717	0.999140526205432	FCF1
-1.08201063761059	4.75131581826795	7.09817362208216	0.0108540078341717	0.999140526205432	MTHFD2L
-0.892955758499938	5.27850917221407	7.09432406614693	0.0108739424114276	0.999140526205432	ARFGAP1
0.869101353949382	5.3206717303985	6.91115207328472	0.0118691991701246	0.999140526205432	IRF3
-0.973041113269852	4.93806475733049	6.82649862483578	0.0123616595713992	0.999140526205432	CTDSPL
-0.712479885773449	5.79633341844112	6.82473561531763	0.0123721450180581	0.999140526205432	MAGEH1
-0.534281310874842	6.7533465367536	6.81621594961922	0.0124229496822921	0.999140526205432	LTBP4
1.06354210519864	4.76503489551975	6.79915893656974	0.0125253361566392	0.999140526205432	ADAMTS1
-0.540691350313893	6.62660314835562	6.77997375076148	0.0126415766457366	0.999140526205432	RAB10
-1.19261158887696	4.40723598876629	6.76065808344183	0.0127597741093984	0.999140526205432	GNG11
0.517409696679952	6.88314985243743	6.75589389627147	0.0127891087533921	0.999140526205432	NME1
-0.409892351504709	8.14682554168896	6.72412953681564	0.0129865457011618	0.999140526205432	CANX
1.28423287832056	4.34157612636787	6.71842996239118	0.0130223161738901	0.999140526205432	TRIM32
0.695309772044152	5.88718442237663	6.69338513322803	0.0131807513262079	0.999140526205432	DHX30
-0.967477416749397	4.93237402089334	6.69303318051417	0.0131829924428426	0.999140526205432	AKTIP
0.702748447392373	5.87253397977458	6.69219443420157	0.0131883349414524	0.999140526205432	LRPPRC
-1.19250258890239	4.41033201163095	6.59677474170995	0.0138115158818532	0.999140526205432	DHRS4L2
1.02334646564382	4.80723697328061	6.58544419976913	0.0138875830905617	0.999140526205432	IRAK1
1.04317450392915	5.09870725730962	6.68635310667425	0.0139292831246499	0.999140526205432	ITPR1
0.505391370957865	7.03218649816982	6.57384184880786	0.0139659400954379	0.999140526205432	ATP1B1
0.940418314988189	5.11318494580187	6.55284172158847	0.0141089718096273	0.999140526205432	NCAPH2
-0.717813270567285	5.72530764474759	6.5459942917402	0.0141559480795962	0.999140526205432	XRN2
-1.16962248932361	4.45653350584093	6.50679342992109	0.0144281271825206	0.999140526205432	SLC35E1
-1.70495111212404	3.88062170428348	6.39794400407816	0.0152137107204136	0.999140526205432	EPG5
-0.709607530251453	5.82303384723815	6.36855926534002	0.0154335557166574	0.999140526205432	TACC2
1.01487769267213	4.81588865910104	6.33562844844566	0.0156839846371719	0.999140526205432	FSD2
-1.42331392152439	4.09103489006045	6.29188908771081	0.0160233672960434	0.999140526205432	RAB30-AS1
1.02019253663714	4.74897517743055	6.28515903562406	0.0160762824798552	0.999140526205432	UBE4B
-0.725135111818941	5.59011074767518	6.21895142471843	0.0166069475773956	0.999140526205432	PTDSS2
-1.41679201455905	4.08782769965375	6.21697644570934	0.0166230632060363	0.999140526205432	PAPSS2
0.810779658361331	5.34048875201001	6.16752356875029	0.0170321138838626	0.999140526205432	GMNN
0.586022588317233	6.21623904934925	6.15823653344382	0.0171101296237616	0.999140526205432	AKR7A2
0.595362381329699	6.18373942292006	6.15351558563346	0.0171499349079063	0.999140526205432	KIF26B
-0.778475771537599	5.40672989707295	6.14920937271734	0.0171863299891441	0.999140526205432	SERPINF1
1.14181891865156	4.44219498204965	6.13286959461973	0.0173251858332705	0.999140526205432	FKBP11
-0.815515617244206	5.26543593530663	6.1216321893416	0.0174213802416513	0.999140526205432	HSPH1
-0.696229510700226	5.67945383048461	6.09601115990279	0.0176428520383487	0.999140526205432	EEF1A1P13
-0.658441847578973	5.82458177408537	6.06376236859133	0.0179259218700458	0.999140526205432	ZFP36L2
-0.564114626980163	6.31396446535579	6.05358159289682	0.0180162954234595	0.999140526205432	TNS1
-1.14239610472611	4.3722373118805	5.98777740670772	0.0186123660371483	0.999140526205432	TNKS
1.3546821749244	4.16361447270491	5.97336051176506	0.0187457665618762	0.999140526205432	PDCL
-1.10499564186925	4.42402507096802	5.96119278637256	0.0188591549523143	0.999140526205432	ZFYVE27
0.854677033486942	5.24695680488022	5.87793128427348	0.0196551119333337	0.999140526205432	ICA1
-1.09537623460439	4.42863209886501	5.83732007908085	0.0200563830405614	0.999140526205432	RBM4B
-0.77692870176605	5.31062110489203	5.83002468951466	0.0201293963416883	0.999140526205432	ARGLU1
0.608035048942588	6.04456446903781	5.82353138933031	0.020194622730126	0.999140526205432	UBE2T
0.554926070374139	6.66161414095186	5.87653310353815	0.0202665663842258	0.999140526205432	EMD
-0.944381111415086	4.86971876075743	5.81560284738786	0.0202745748376897	0.999140526205432	ACSL4
-0.937484972473228	4.81846316364719	5.75833581276792	0.0208622734452569	0.999140526205432	ERBIN
0.917025691997878	4.92342724101857	5.75639845177771	0.0208824733308735	0.999140526205432	NANOS1
0.97214039694014	4.79029483947832	5.72064384046879	0.0212590728232676	0.999140526205432	MLLT6
1.41788649046423	4.07597600055609	5.71526293874135	0.0213163793630189	0.999140526205432	SDCCAG8
0.908599711150814	4.92205955750796	5.70948071595703	0.0213781453905489	0.999140526205432	ABHD4
1.14496160512456	4.43001542896025	5.68615763336175	0.0216292470584118	0.999140526205432	RPRD2
0.644730988159376	5.83953908077732	5.65867737738924	0.0219291882209134	0.999140526205432	NFE2L2
-0.453242588287063	6.97421323181584	5.64748332840866	0.0220526502388478	0.999140526205432	CAMTA1
-0.976208756846438	4.61898643092173	5.62907821884952	0.022257275373869	0.999140526205432	POLG
1.28335531108591	4.22288323137124	5.58999004659258	0.0226986688462534	0.999140526205432	LYRM2
0.912987533033869	4.99577109882113	5.56774543879309	0.0229540644742918	0.999140526205432	SMIM27
0.870146446593392	5.00403451073158	5.55872563988313	0.0230585039208286	0.999140526205432	MFSD11
-1.36554059788473	4.05084988306517	5.55579400006201	0.0230925593139036	0.999140526205432	COG3
1.19143038182279	4.28447890366779	5.54276266536086	0.0232445952798762	0.999140526205432	CMIP
1.09708685944105	4.41503235015591	5.54052157876287	0.0232708504975673	0.999140526205432	TYRO3
-1.24301769450072	4.18485260966231	5.52470864644075	0.0234570163787708	0.999140526205432	ICE2
0.710916676397514	5.66164249777815	5.49717844141404	0.0237849724289729	0.999140526205432	MDFI
1.20806201926345	4.28292946128366	5.48579434301743	0.0239220285819704	0.999140526205432	RAP2B
1.07316561933146	4.48083503061879	5.45479844211841	0.024299531815011	0.999140526205432	MTHFR
0.419515769202657	7.27430251528572	5.44153358715102	0.0244630454003963	0.999140526205432	DECR1
0.476343830267641	6.72202161229956	5.42385503009522	0.024682813827014	0.999140526205432	ITGA11
-1.29225117951119	4.12005944958421	5.42139584346489	0.0247135532477148	0.999140526205432	NF1
-0.915158428803047	4.94316984936711	5.38441310240157	0.0251808479592128	0.999140526205432	DLG1
0.494796376397605	6.56450522638541	5.35754818340675	0.0255262764941732	0.999140526205432	EMILIN1
0.686739707021541	5.65714423646903	5.35196369254651	0.0255987220093309	0.999140526205432	SNAP23
-0.920636872491376	4.76683948403549	5.35103642446886	0.0256107725875869	0.999140526205432	RNF113A
-0.828461932840483	5.16529037749829	5.34027431905692	0.0257510835931024	0.999140526205432	TMEM106B
-0.580667169593784	6.02712392879791	5.33961005779375	0.0257597710579245	0.999140526205432	BIRC5
-0.308169968326574	12.23137960231	5.33015728822309	0.0258837415980033	0.999140526205432	MT-RNR1
1.21669662100412	4.28761443981964	5.32588508254599	0.0259399816922276	0.999140526205432	ATG7
1.25350812013396	4.22442129497375	5.30313471371245	0.0262417028635884	0.999140526205432	C17orf49
0.442813594271509	6.99845063997728	5.29538449503157	0.0263453521126076	0.999140526205432	MAP7D1
-0.942983468520081	4.66736266678538	5.27582954124116	0.0266088455160892	0.999140526205432	COX6A2
-1.13331355169897	4.28976237131194	5.27512305338481	0.0266184182277737	0.999140526205432	CPQ
-0.581835065601784	6.10948873529871	5.2733767258358	0.0266420964446487	0.999140526205432	SRSF11
-1.0047400909115	4.50184749332151	5.26547735170466	0.026749487647988	0.999140526205432	TBCE
-0.451725691528829	6.85630146703618	5.26185884199738	0.0267988370495207	0.999140526205432	BASP1
-0.903606412744735	4.74699664695091	5.25238924731799	0.0269284500434146	0.999140526205432	PEAK1
0.988481319823091	4.57764364750226	5.2091550542453	0.0275288775576691	0.999140526205432	THAP9-AS1
-0.582894059297569	6.00714596677452	5.20643277741534	0.0275671652625864	0.999140526205432	SLC25A12
1.13021812622992	4.34544316681996	5.1920259013666	0.0277707529765091	0.999140526205432	ZBTB1
0.433257584461266	7.05650803587317	5.17008991164752	0.0280838655332692	0.999140526205432	NDUFS3
0.419939764238944	7.18856076542934	5.16132317935998	0.0282100671552426	0.999140526205432	IARS
0.746495581167881	5.29845996712002	5.15430603860708	0.028311524492725	0.999140526205432	PNMA8A
0.414504161912439	7.33561298832124	5.1540735245454	0.0283148930459699	0.999140526205432	COPZ1
-0.490886453513092	6.4890665642922	5.14990108437576	0.0283754151274278	0.999140526205432	TMEM132A
-0.686122422267212	5.48723104855397	5.1011445546166	0.0290931055995305	0.999140526205432	GNPDA1
1.00290470578596	4.75628928675672	5.14253334479551	0.0291808434867403	0.999140526205432	USE1
0.62888388745073	5.73225773701554	5.09014315361201	0.0292577461638663	0.999140526205432	MED15
1.05961108020778	4.39201658815686	5.06892099035225	0.029578200870543	0.999140526205432	CMTR1
0.468228861464879	6.65156780670402	5.06234383975064	0.0296782855272651	0.999140526205432	HMGA2
-0.670695573992904	5.54900893194123	5.06148983928678	0.0296913077425197	0.999140526205432	TRIM8
-0.964229921310682	4.60702147063653	5.06024081479249	0.0297103646179039	0.999140526205432	ZFYVE16
-0.613738090561828	5.77268282360277	5.0485116265532	0.0298899690888166	0.999140526205432	CITED4
0.968993879042407	4.72541137995378	5.04170991884145	0.0299946592410791	0.999140526205432	ADAMTSL1
1.15742015200896	4.25591812776078	5.03654381549828	0.0300744398934207	0.999140526205432	CASK
-0.578905568621395	5.98736489207021	5.03587067708729	0.0300848521474874	0.999140526205432	LZTS2
-0.461174213028785	7.11131213472364	5.09127333580538	0.0301347002235994	0.999140526205432	AC080038.1
1.23481910651615	4.19316097040694	5.02806642470921	0.0302058554702087	0.999140526205432	PWP2
1.03502821052513	4.45752569748046	5.02221078802572	0.0302969919872495	0.999140526205432	PGAM5
0.768199971708825	5.27328533289449	5.01373067088698	0.0304295040049621	0.999140526205432	FAM171A2
-0.890685970606017	4.78149273950681	4.98722221045417	0.0308477952873086	0.999140526205432	RNF25
-1.00942092856658	4.44656244870094	4.9336653269787	0.0317120336607715	0.999140526205432	TENT5A
-0.589613372964183	5.83392420224249	4.92418070980985	0.0318678027582363	0.999140526205432	ERG28
0.469622692600944	6.57473510515423	4.91897114787551	0.0319537139497341	0.999140526205432	GABARAPL1
0.890873021650558	4.73331904616289	4.87802328409336	0.0326377979033021	0.999140526205432	CDKN2D
1.26071657690877	4.1090188546696	4.8762663225142	0.0326675032913854	0.999140526205432	.2401
-0.581058068231472	5.89380147797049	4.86504681608313	0.0328578872639711	0.999140526205432	HGS
0.926886335995527	4.68155571879048	4.86214898013987	0.0329072560437657	0.999140526205432	PRKCH
-0.731774721151228	5.2889993511181	4.85861040661217	0.0329676498620368	0.999140526205432	ACVR1
-1.01512645338976	4.37922039149448	4.8479550916604	0.0331502344899718	0.999140526205432	C1QTNF3
0.47796050153051	6.48776712241255	4.84656625262054	0.0331741137140776	0.999140526205432	CDK16
0.872575216089813	4.88912515277063	4.82539775773833	0.0335403973851577	0.999140526205432	RMI2
-0.856455485201213	4.86182802875956	4.80943729386458	0.0338194671073751	0.999140526205432	TBC1D20
0.584448391995205	5.86455763453031	4.80671836899441	0.033867258435526	0.999140526205432	AFAP1
0.352786004499884	7.91426392109278	4.80269901716902	0.0339380420908513	0.999140526205432	SAP18
-0.589795802739222	5.91423326690473	4.79558502623398	0.0340637185574567	0.999140526205432	HLA-B
-0.832964030009682	4.85886002848975	4.7950275626343	0.0340735880904102	0.999140526205432	MAD2L1BP
0.8775975916561	4.91637568781858	4.79163919325193	0.0341336438061785	0.999140526205432	COMMD8
0.735462201384635	5.25598621103232	4.78910820986995	0.0341785781284633	0.999140526205432	DHRS4
0.732376412463878	5.31294651130726	4.77565115937062	0.0344185716984192	0.999140526205432	PPME1
0.572606493545579	5.93557948546517	4.7750779982643	0.0344288340230443	0.999140526205432	NELFB
0.693131811651426	5.3780688142276	4.75131774584314	0.0348571942776624	0.999140526205432	EFR3A
0.674912094529497	5.50073385210816	4.75023819023729	0.0348767939714573	0.999140526205432	GLT8D1
0.938214798301436	4.61795450543612	4.74419446156663	0.0349867412326704	0.999140526205432	ZBTB47
-0.630911748815331	5.71545957561408	4.7429552535156	0.0350093313358485	0.999140526205432	.1860
-0.457809509712589	6.69648944065235	4.72581880100535	0.0353233497792534	0.999140526205432	HMCES
0.961214268915648	4.63717511763619	4.72539134264903	0.0353312217938424	0.999140526205432	TTC27
-0.612169531311361	5.66154152746516	4.72517863441261	0.0353351397098567	0.999140526205432	MYH11
0.964772870391391	4.58514525152469	4.71940484344737	0.0354416688602502	0.999140526205432	FUZ
0.621050116375876	5.78530964994022	4.69514486746812	0.0358931062963466	0.999140526205432	DPYSL4
-0.806396475261919	4.93100899701034	4.66777883347188	0.0364098570316935	0.999140526205432	BSCL2
-0.625441276106324	5.58644202162294	4.66449872653732	0.0364723358716628	0.999140526205432	XPO7
0.335909310545084	8.25619195864035	4.64506498948865	0.0368449057471667	0.999140526205432	SUB1
1.18983271693878	4.16916369650192	4.63728117203141	0.0369952907499345	0.999140526205432	COG1
0.917707689507867	4.67457389888736	4.63396484540064	0.037059565583437	0.999140526205432	PPARD
-1.07786075700188	4.26515366822332	4.61369115975663	0.0374551474786485	0.999140526205432	KCTD9
-0.968264285265961	4.42633626713065	4.61040629830667	0.0375196733264908	0.999140526205432	RSPRY1
-0.640549315554576	5.58170929276947	4.58221133171858	0.0380785195914924	0.999140526205432	MRFAP1L1
-0.609410264171086	5.62784220861865	4.57117039715624	0.0382998224031471	0.999140526205432	RANGRF
-0.453158171453567	6.6819014114681	4.56183765610998	0.038487978524557	0.999140526205432	EPN1
-0.530407683551307	6.21170043276941	4.55809754459527	0.03856366465204	0.999140526205432	PRCP
1.02598981779777	4.36085262711887	4.54588239706719	0.0388119854689286	0.999140526205432	SKIV2L
0.68986509587228	5.33394941791202	4.54468576757054	0.0388364051363371	0.999140526205432	SRSF8
1.03381029241859	4.44751018879807	4.53984153750268	0.0389354326377955	0.999140526205432	POLL
-0.345212957793683	8.09480968203189	4.53913879506532	0.0389498211766989	0.999140526205432	LGALS3BP
0.699055306560998	5.40202383878514	4.53374393271417	0.0390604731750148	0.999140526205432	DYSF
1.30197572457087	4.00922398656375	4.5320957426985	0.0390943468191764	0.999140526205432	KDELC2
-0.965128780230476	4.42479794041688	4.51482864893178	0.0394511503738538	0.999140526205432	SAP130
0.923839645596108	4.67455825101368	4.49363944343443	0.0398938551850423	0.999140526205432	MAPK8
0.430704892965339	6.76756469402121	4.48299946096403	0.040118194756261	0.999140526205432	CHMP5
-0.664854230797533	5.38179952988799	4.47825720762181	0.0402186257909972	0.999140526205432	MID1
1.24445534722698	4.10739352097919	4.46602056827541	0.0404790403168887	0.999140526205432	SYS1
-0.67880683325996	5.37062031265119	4.4557142983501	0.0406997998066502	0.999140526205432	B3GNT2
0.563929166957161	5.93287357322579	4.43197757950517	0.0412132478072889	0.999140526205432	LMOD1
-0.528999218295436	6.05306129919631	4.42398746075746	0.0413876673225359	0.999140526205432	ALPK2
-0.606839945824979	5.75976508858879	4.41197688432905	0.041651367559576	0.999140526205432	SUGP2
1.01032614433577	4.35931327712808	4.40504452551498	0.0418044059297736	0.999140526205432	SMIM29
-0.547439164705417	5.99941690225907	4.40495608290795	0.0418063623424521	0.999140526205432	EIF4EBP2
0.636664048475803	5.48959259719058	4.40479583248529	0.0418099074489811	0.999140526205432	TPD52
-0.522484996382435	6.05087362975249	4.39541820785491	0.0420179342479385	0.999140526205432	HUWE1
-0.529115715422322	5.99165868629002	4.39019137954842	0.0421343725574407	0.999140526205432	TMEM30A
-0.803209874738015	4.89176332157871	4.37670717383251	0.0424363899270472	0.999140526205432	EXTL2
0.816904228205644	4.86041294508115	4.36838660674699	0.0426239310484165	0.999140526205432	FOXN3
-1.32644641045127	3.91852338841014	4.35574357787135	0.0429106320709156	0.999140526205432	TNK2
0.401181437357618	7.11952675136943	4.34843068190403	0.0430774242608799	0.999140526205432	NDUFA5
-0.678187524996912	5.33322236095316	4.34480559431904	0.0431603673811807	0.999140526205432	BCL7B
-1.29499025982463	4.02771909502045	4.34456752444323	0.0431658205916296	0.999140526205432	COL9A1
0.821491523596956	4.93407429457896	4.33834037420394	0.0433087267544499	0.999140526205432	MAP1S
-0.532765890757984	6.05162092912324	4.33457233427921	0.0433954498953802	0.999140526205432	MRPS18C
0.780600911388476	4.95687778421586	4.33233955924936	0.0434469276856193	0.999140526205432	CDK9
-0.483379305349672	6.24138684933254	4.32422901563559	0.0436344823367015	0.999140526205432	CREB3
-1.04333978329921	4.24158136023996	4.31671769311333	0.043808969021244	0.999140526205432	THAP3
-1.24914880546895	3.98428365845963	4.31365485065967	0.0438803369221468	0.999140526205432	UBL5P2
-0.783331410560934	4.91763493971295	4.31026659177809	0.0439594354027066	0.999140526205432	RNF38
0.6571989869192	5.40171708065973	4.3063339875958	0.0440514369107174	0.999140526205432	DGKZ
-0.482821319069535	6.40027176882958	4.30399075891885	0.0441063556854502	0.999140526205432	MTUS1
0.847598906121044	4.70797964074958	4.29718868021062	0.0442662016979121	0.999140526205432	CBSL
-0.878445587334181	4.56840349070232	4.28959711550243	0.0444453480696054	0.999140526205432	BCAP29
-0.560730257026469	5.8626171923032	4.27944462097129	0.0446861667936586	0.999140526205432	ILVBL
-0.868741553578844	4.6906539755475	4.27204740032196	0.0448625279354217	0.999140526205432	ANO4
-1.12925914930924	4.12086111052099	4.26563782406832	0.0450159573871335	0.999140526205432	DIP2A
0.434356513890538	6.76385535677306	4.26121596745134	0.0451221400366542	0.999140526205432	THY1
-0.566666224969228	5.79081382482504	4.25471687704678	0.0452787008506641	0.999140526205432	VGLL4
-0.615269342185238	5.58279346057741	4.24353002022229	0.0455495810987511	0.999140526205432	LYPLA2
0.375170512057803	7.22447844308613	4.22444643210509	0.0460157729715705	0.999140526205432	FAM84B
-1.31292543419851	3.91856541896155	4.2200685543973	0.0461234541802642	0.999140526205432	MARF1
1.4243927772277	5.59455833862817	6.00462063021091	0.0461772502709101	0.999140526205432	BBS9
-0.38876666261152	6.98881554028507	4.2173968415156	0.0461893048282672	0.999140526205432	SDHC
-0.599060304565633	5.82146785548635	4.24167175186545	0.0462260627376701	0.999140526205432	ACSL3
-1.28020708098683	4.36081431044345	4.52841431923408	0.0462854583910082	0.999140526205432	NFIA
-0.802767090194271	4.87519447160249	4.19165993159304	0.0468289456126865	0.999140526205432	SSPN
0.916763897595633	4.46432990332632	4.19019408639386	0.0468656669426431	0.999140526205432	PHF12
-0.658807846953573	5.39259210019857	4.18574887002204	0.0469772182092702	0.999140526205432	PIK3R3
-0.465816797351303	6.31535047028821	4.18411362629808	0.0470183272024125	0.999140526205432	SUN1
-0.61200459843986	5.5607057654016	4.1803635248156	0.0471127511362082	0.999140526205432	MRS2
1.13439244669866	4.13981107173805	4.17603593560076	0.0472219736781411	0.999140526205432	PURA
-1.39425811896917	3.84598948013667	4.16996695579024	0.0473756137439055	0.999140526205432	NMRK1
0.72274752791757	5.10965604059536	4.16369615403647	0.0475349380580789	0.999140526205432	C15orf41
0.707042942895954	5.18829240391183	4.1590724496345	0.047652789725059	0.999140526205432	H3F3AP6
-0.958433658418857	4.34526470261891	4.15336077899783	0.0477988139793261	0.999140526205432	ZNF644
0.416828239987711	6.7345807914372	4.12892600486277	0.0484290677986124	0.999140526205432	ZNF207
-0.821617563285531	4.71073034284121	4.12094856639393	0.0486367988098245	0.999140526205432	CHIC2
-0.475498328119757	6.2520160456521	4.11192718611801	0.04887289072001	0.999140526205432	HMG20B
-0.667975771247612	5.25816587291216	4.11030943241149	0.0489153603839213	0.999140526205432	CNOT1
1.13664974391107	4.1445890716218	4.10102136987017	0.0491599767757823	0.999140526205432	C17orf58
-0.871556407497088	4.50412458189443	4.09286396716569	0.0493759213203664	0.999140526205432	KALRN
-0.911650697836332	4.44735495822642	4.08627535338123	0.0495510955539262	0.999140526205432	RMDN3
0.930668499472555	4.67159475057094	4.11393829029256	0.0498843151151251	0.999140526205432	DYNC2LI1
0.608966322389907	5.54477253308607	4.05130136820105	0.0504924441647512	0.999140526205432	TNS3
1.2247987037069	4.0719811874895	4.04618286584111	0.0506318495986788	0.999140526205432	GPD1L
-0.625137128234724	5.39262241981375	4.03618506978062	0.0509053647100353	0.999140526205432	PLRG1
0.59899968101137	5.57272110390382	4.03611158046913	0.0509073811878147	0.999140526205432	GRPEL1
0.786823134781836	4.85552411279476	4.03278515146948	0.0509987470946243	0.999140526205432	TMEM176B
0.499903368138705	6.16688816151842	4.02646094472491	0.0511729485000793	0.999140526205432	MLEC
0.626283680274597	5.41163646089051	4.00954384770602	0.0516421505217207	0.999140526205432	KIF1B
0.655631683604932	5.32923017538791	4.00852259748362	0.0516706260011271	0.999140526205432	SMPD1
-0.520191636857188	5.95417101004958	4.00617071359633	0.0517362690483767	0.999140526205432	FAM207A
-1.00067365627267	4.28586429633081	4.00377008412851	0.0518033670329221	0.999140526205432	FRMD4A
-0.655155504755373	5.46038426204428	4.01211567712633	0.051919042602276	0.999140526205432	CABIN1
0.309762056758653	8.27635721113704	3.98744994734654	0.0522620574736377	0.999140526205432	EID1
0.78621245350126	4.79310618891656	3.98375302111753	0.0523665807899508	0.999140526205432	MCEE
-0.716283928143095	5.01828555467834	3.96913112513458	0.0527822411916855	0.999140526205432	ST6GAL2
0.465297373685571	6.29242119030569	3.9569997427508	0.0531298540075904	0.999140526205432	TRIP12
-0.609315529565539	5.44658161216412	3.95211492904245	0.0532705330110033	0.999140526205432	CUL4A
-0.727352557724337	5.09142546796528	3.9460669482648	0.0534452776313653	0.999140526205432	ST7
-0.578687895947319	5.58936398423758	3.93673908594011	0.0537160240501446	0.999140526205432	PARM1
-0.285818305292713	9.09782404297815	3.93174510775183	0.0538615962311799	0.999140526205432	ITGB1
0.902040374742223	4.45978862233469	3.91231525127821	0.0544321067992567	0.999140526205432	NAT10
0.557681663175104	5.69055366644607	3.91154987277103	0.0544547158576436	0.999140526205432	MAPK14
-0.423672407643307	6.62043543664045	3.90024924463663	0.054789737522325	0.999140526205432	PAFAH1B1
0.724797525568876	5.06416839495867	3.89820411989255	0.0548506097198903	0.999140526205432	UPF1
-0.50426467678309	6.02842820801665	3.8941252974381	0.0549722361836194	0.999140526205432	ANKH
-0.327982328211223	7.90202929215422	3.86457079003728	0.0558624352514633	0.999140526205432	FXYD6
-0.893717199657864	4.58804684811584	3.86992145393642	0.05641514059455	0.999140526205432	EML2
0.435626304053826	6.41861481665661	3.84421876328627	0.0564846681014344	0.999140526205432	KIF13A
-0.831963939647239	4.58717160256843	3.84240239817511	0.0565405704330933	0.999140526205432	ZBTB18
1.15817561565451	4.04376747156191	3.84184001557148	0.056557891246495	0.999140526205432	NR2C2
-0.559258435474412	5.71256987293878	3.83620157972657	0.0567318725588635	0.999140526205432	KCNMB4
-0.733153814733613	4.93318334359948	3.83519329495694	0.056763046558414	0.999140526205432	SLC25A17
-0.405211975547246	6.9938580227687	3.86220377510202	0.0568063186071088	0.999140526205432	PFDN1
1.16186481337667	4.04216913125599	3.81836272215595	0.057286206436686	0.999140526205432	TASOR
-0.801943300625727	4.68704830354109	3.81142982929353	0.0575032499046351	0.999140526205432	RP9
-0.730387928949224	4.90108026203738	3.80431276689663	0.0577270015413875	0.999140526205432	SLC25A26
-0.797864652832074	4.6422348247589	3.80312397543539	0.0577644690603547	0.999140526205432	KCNA5
-0.517378428800759	5.99937539531512	3.80251710881439	0.0577836061960141	0.999140526205432	LAMA2
0.38295971871338	6.95529918282062	3.80157772252895	0.0578132428922172	0.999140526205432	CLTB
0.451510812783618	6.32389919771627	3.79514951872543	0.0580164961933424	0.999140526205432	MRPL22
-0.367853783144228	7.11462890113679	3.79514893733716	0.0580165146118169	0.999140526205432	ATOX1
-0.471889009900018	6.20255935491204	3.79415963715536	0.0580478651354598	0.999140526205432	PRKAG2
-0.516129884839684	5.88753730973225	3.79105042005855	0.0581465165439812	0.999140526205432	SNX12
0.995655537638266	4.26138986181518	3.78872708005405	0.05822035368442	0.999140526205432	TTI1
0.40549662449033	6.67728491286088	3.78845604965293	0.0582289739199332	0.999140526205432	MAT2A
0.473660249867771	6.12448867852571	3.77053375437408	0.0588021337871208	0.999140526205432	OGN
0.46992861349492	6.12975436418821	3.7628366055859	0.0590501970267975	0.999140526205432	H2AFJ
-0.583648310325405	5.5280939916683	3.74961798597121	0.0594789022038326	0.999140526205432	CBX4
0.917410492746392	4.38356469313924	3.74627521752275	0.0595878574647198	0.999140526205432	NCDN
0.882822923981964	4.44063938760912	3.74271107622953	0.0597042707221304	0.999140526205432	RNF34
-1.25475212563658	3.87902268075651	3.73917959322343	0.0598198647098162	0.999140526205432	C12orf76
-1.02916959899078	4.1523948242355	3.7330742923066	0.0600202886792406	0.999140526205432	RGS10
0.498254987945182	6.00925196720068	3.73175159511599	0.0600638075448975	0.999140526205432	CISD2
-0.946739920443719	4.26594121979899	3.72992462404451	0.0601239750839944	0.999140526205432	TBCK
-0.603296227138239	5.46955427598624	3.72984645641158	0.0601265508571334	0.999140526205432	EGLN3
-0.619892796136837	5.49833874296798	3.74062507625022	0.0601626050562233	0.999140526205432	RAPGEF1
-1.26152800610413	3.87899993168308	3.7261600576284	0.0602481631029278	0.999140526205432	PRAG1
0.58834224607088	5.53637668661447	3.72258870502193	0.0603662388709543	0.999140526205432	CRISPLD1
0.710131433609822	5.01506381582936	3.72158860698218	0.060399349770318	0.999140526205432	SH3KBP1
-1.33638592909933	3.80280339611308	3.71945092992362	0.0604701904498726	0.999140526205432	CA14
-0.377941523879034	6.90687551587832	3.71009096950659	0.060781452423215	0.999140526205432	SULF1
0.822302325229425	4.55961216838556	3.7081862242655	0.060845010269817	0.999140526205432	NFIC
0.31735701187308	7.76715159146168	3.69965330775861	0.06113063972456	0.999140526205432	EIF3C
-0.643919413942609	5.2093399265759	3.69610475952517	0.0612498586843879	0.999140526205432	PCGF3
-0.460506056745699	6.14536106536911	3.6817176029537	0.0617358541661054	0.999140526205432	FBXW5
0.810947974235701	4.62314759296918	3.67890699384452	0.0618312922685075	0.999140526205432	NCKAP5L
0.994804321367462	4.25043415459075	3.67868083542733	0.0618389788680223	0.999140526205432	WASHC5
-0.473728130109413	6.11304183574781	3.67536695441797	0.0619517310841543	0.999140526205432	CIB1
-0.843132543742284	4.47864765437058	3.66509737423561	0.0623025900237722	0.999140526205432	HIST1H2AC
0.395135017908134	6.814539836242	3.66339054770585	0.0623611159552258	0.999140526205432	MPC1
0.565821464275671	5.58020300626637	3.66321904389489	0.062367000062061	0.999140526205432	TNNT1
0.931881242903679	4.31249045248023	3.65794395657308	0.0625482823695404	0.999140526205432	NDC80
0.931881242903679	4.31249045248023	3.65794395657308	0.0625482823695404	0.999140526205432	HERC4
0.798906212158628	4.67827681626369	3.65594853559081	0.0626170081760148	0.999140526205432	DONSON
0.782599173137699	4.66947512777531	3.64737401105725	0.0629132808696207	0.999140526205432	EXOC4
0.362967408644937	6.97621203665127	3.64068181479458	0.0631455903837649	0.999140526205432	PSMC1
-0.504353367063069	5.88401651924625	3.63305984150774	0.0634113310809772	0.999140526205432	HSD17B4
0.572982937701602	5.51795554057679	3.62340938950698	0.0637495697591718	0.999140526205432	SLC9A3R2
-0.545784928140873	5.66430822679666	3.61760329415268	0.0639540282519817	0.999140526205432	FYTTD1
-1.01930386274697	4.15081248864986	3.61654125849772	0.0639915056394192	0.999140526205432	THG1L
0.356148848700637	7.18825782487368	3.61551393100929	0.0640277813425443	0.999140526205432	TFG
-1.20051388832182	3.94975521458	3.61466443038532	0.0640577950206555	0.999140526205432	B3GALT2
-0.460946605901202	6.15474149294566	3.61345548152615	0.064100535178514	0.999140526205432	EHD4
-0.64889383742551	5.25933762733343	3.61065501824938	0.0641996615673224	0.999140526205432	CRADD
-0.439676476719778	6.26254432670268	3.61044290847476	0.0642071763977315	0.999140526205432	COL4A6
0.45820463167935	6.23611958302997	3.60980135484078	0.0642299119019665	0.999140526205432	FLRT2
-0.94026599347979	4.26909093221956	3.6060365471295	0.0643635094424171	0.999140526205432	HIC1
0.730805493116166	4.87246073171664	3.6026212429702	0.0644849704192944	0.999140526205432	MRTFA
0.285093092305393	8.51184246304913	3.59733293831809	0.0646735427722104	0.999140526205432	FLNA
0.72819304134145	4.87104799096428	3.59577913277748	0.0647290648268436	0.999140526205432	STARD3
-0.777667586505699	4.74178783518712	3.59283232526936	0.064834507826959	0.999140526205432	PIGQ
-0.710476890682661	5.04120823626101	3.5897083559564	0.0649464975848465	0.999140526205432	PSMG3
0.502582360103329	5.86676963076891	3.58657389748573	0.0650590784869907	0.999140526205432	FBXO9
0.874407158156601	4.44981146638686	3.57998701191135	0.0652963651184715	0.999140526205432	FANCF
0.777118536689236	4.78012306501487	3.5788296231316	0.0653381578403214	0.999140526205432	UNC50
0.747040556870002	5.80555621344501	3.95640188234451	0.0653624391113173	0.999140526205432	ABR
-0.790560876927182	4.57371799955927	3.57801898760093	0.0653674471039902	0.999140526205432	EXOSC5
-0.439216837924686	6.30690361892695	3.57679057379234	0.0654118589071763	0.999140526205432	AEBP1
0.513530321281254	5.83331918965356	3.57629760204891	0.0654296910872364	0.999140526205432	R3HCC1
0.43137289175886	6.373819992834	3.57530168541913	0.0654657326184607	0.999140526205432	SPATS2L
0.719768626145092	4.91786922861715	3.57462819742932	0.0654901181333423	0.999140526205432	FOXRED1
0.794780421902101	4.60945703348971	3.56376348175515	0.0658848979474255	0.999140526205432	CPOX
0.574388085719195	5.48529444725843	3.55485047871723	0.066210727704052	0.999140526205432	ATG13
-0.693235362514782	4.96845977867393	3.55274868776908	0.0662878218671347	0.999140526205432	MBOAT7
0.781185919459388	4.67537146214841	3.5473076939593	0.066487860829321	0.999140526205432	RAB3IP
-2.79556043438977	5.63703780425427	7.99739373867539	0.0671434159671649	0.999140526205432	MT-ND6
0.757473889709912	4.71157973422348	3.52634530226291	0.0672648195178834	0.999140526205432	TIMM29
0.585033878441611	5.42409833959834	3.5211992188032	0.0674570900582762	0.999140526205432	DPF3
0.527311885358282	5.69091821924509	3.49795150120082	0.0683333062738069	0.999140526205432	STX10
0.619272369248127	5.41869849880232	3.49614289338588	0.0684020005150247	0.999140526205432	PTPRK
0.719657807361172	4.86966128329948	3.48237754207304	0.0689273497676503	0.999140526205432	ETFDH
-0.499164130058845	5.88221884106711	3.47827213084731	0.0690848961743479	0.999140526205432	RING1
-0.442790613677388	6.32183336428794	3.47272097153637	0.0692985590694673	0.999140526205432	ACAA2
0.742165259336478	4.82333887794142	3.47103935562654	0.0693634286604254	0.999140526205432	MTCO2P12
-0.628162129925077	5.18950696290599	3.46348942571821	0.0696555041418071	0.999140526205432	UBALD1
0.478068051096011	6.18588550392979	3.46767508502617	0.0697995288653224	0.999140526205432	SELENOS
0.525834580338915	5.68738944764713	3.45977080107131	0.069799863613744	0.999140526205432	ALDH4A1
-0.357061912868241	6.93714623376852	3.44919228459422	0.0702123472637546	0.999140526205432	FKBP4
0.405608857676825	6.51501446307839	3.4398328821121	0.0705795508621606	0.999140526205432	DACT1
-0.350248491476038	7.08790964083961	3.43875398205944	0.0706220169026404	0.999140526205432	MRPL12
0.608022258381588	5.68138247798163	3.49157266064823	0.0708530692616144	0.999140526205432	BOLA2
-0.63149135822152	5.2280298554833	3.42302964684223	0.0712441648685491	0.999140526205432	MED22
-0.778188294984189	4.57671120073333	3.41171096457016	0.071695766156494	0.999140526205432	IBTK
-0.778188294984189	4.57671120073333	3.41171096457016	0.071695766156494	0.999140526205432	NEPRO
-0.656009672753318	5.07392307681256	3.40551287321066	0.0719444089258213	0.999140526205432	GOPC
-0.293221905653584	8.07347867353205	3.40334245137679	0.0720317039507118	0.999140526205432	NONO
0.657549793266187	5.2577192888731	3.3998909280404	0.0722225546383825	0.999140526205432	TMSB15A
0.771060581335774	4.66656212986223	3.39646958583955	0.0723089099780679	0.999140526205432	TUSC1
0.740401266343966	4.77011354457852	3.39473150090671	0.0723792004992281	0.999140526205432	FAM104A
-0.473558564147051	5.95015038387237	3.39337096086701	0.0724342755722928	0.999140526205432	TIMM50
-0.436892547092072	6.24225234419478	3.39178474869106	0.0724985447286992	0.999140526205432	ZNF706
0.556642691640269	5.51193796472882	3.3888505729662	0.072617596936499	0.999140526205432	CENPN
-0.562293429989742	5.48952650898037	3.38760985868712	0.0726680034325695	0.999140526205432	NEK9
-0.319045828599439	7.48312179249451	3.38558909913313	0.0727501840945748	0.999140526205432	SEC11A
-0.712383272581723	4.92125493573192	3.37699102516611	0.0731010090907829	0.999140526205432	SMO
-0.664914587076986	5.04093456360025	3.37653720803202	0.073119578256864	0.999140526205432	POLR2A
0.613470884409984	5.26113602454448	3.37261012822712	0.0732804846550678	0.999140526205432	JMJD8
-0.747709969636569	4.66740718925744	3.34787417527693	0.0743031011613126	0.999140526205432	PLCXD3
0.667952401848035	5.04032201426769	3.34356906521018	0.074482696693311	0.999140526205432	LAMA4
-0.539948179157687	5.60087096424104	3.34094281549912	0.0745924926565422	0.999140526205432	LSM14B
-0.610650196362336	5.2298006603589	3.33438694997452	0.0748673613492001	0.999140526205432	CPD
-0.433833444100633	6.18610865541544	3.31899817993657	0.0755170080860114	0.999140526205432	DPY30
0.411774398038096	6.42575405895662	3.31733462431845	0.0755876111826691	0.999140526205432	ASNS
0.482010761046098	6.01096916847706	3.31229415046511	0.075801983434671	0.999140526205432	MLST8
0.382023151399133	6.75510808538681	3.31148075470405	0.0758366406968864	0.999140526205432	GDI1
0.48823480264511	5.82697968642789	3.3064540031896	0.0760512129941519	0.999140526205432	MRPS28
0.794617738966766	4.53296911842556	3.29959891283939	0.0763449204678466	0.999140526205432	WDR48
-0.705802353250912	4.87016213868156	3.29150192350449	0.0766934660468596	0.999140526205432	UTP4
0.329022146364766	7.28712639487809	3.28811480242351	0.0768397947399239	0.999140526205432	PDHB
-0.667201438520513	4.94844045831769	3.2859587834891	0.0769330999941626	0.999140526205432	RNF185
1.09376917354436	4.0100099935524	3.2838469065438	0.0770246173426882	0.999140526205432	TMEM138
0.708778647127857	4.91511012850322	3.27841471594262	0.0772605770275215	0.999140526205432	IFNGR1
-0.621304551355359	5.16585029687438	3.2784111299177	0.077260733060588	0.999140526205432	MT-ND4L
0.590040764104382	5.31822982072995	3.27497043772498	0.0774106044488669	0.999140526205432	RABEP1
0.799853103725191	4.63058293726386	3.27205833687201	0.0775377044050177	0.999140526205432	JPX
-0.785426721785923	4.6280457314523	3.26172348068013	0.0779906552352711	0.999140526205432	INTS13
-0.847112559076427	4.43790564940961	3.25724764162311	0.0781877348848257	0.999140526205432	TCTN1
-0.624047223401487	5.15241721245207	3.25152314154075	0.0784406052626809	0.999140526205432	SMTN
0.745317086722602	4.75827221273701	3.24863573292912	0.0785684977385175	0.999140526205432	FOXJ3
-0.930943861228978	4.45958451610661	3.32557538780864	0.0786072412432131	0.999140526205432	ZNF618
0.508290159788643	5.68879664721911	3.24732490175743	0.078626635349839	0.999140526205432	WNK1
0.947576177450269	4.22285726683496	3.24730996427626	0.0786272981292104	0.999140526205432	RUNDC1
-0.936127730784621	4.18009071646446	3.24729993267153	0.0786277432372473	0.999140526205432	SPC24
0.496680001718051	5.79736505196498	3.24416669651329	0.0787669043498959	0.999140526205432	DUSP14
-0.34304175238339	7.25981505700167	3.23368661733072	0.0792343721364457	0.999140526205432	MGST2
0.761085119740972	4.64311025569955	3.23291779316013	0.0792687874994583	0.999140526205432	XPO5
-0.751066081316124	4.71008113395279	3.23199012427961	0.0793103355359268	0.999140526205432	ERCC2
-0.49219964330849	5.7803925791072	3.23008953479831	0.0793955342392373	0.999140526205432	CSNK1G2
0.73525087740729	4.76267194775835	3.2247116417884	0.0796371657246459	0.999140526205432	SERF1A
-0.903942104684064	4.24237722637419	3.22396224488752	0.0796709016144054	0.999140526205432	PKNOX1
0.777508696034695	4.65192921383414	3.21811412383124	0.0799347173631675	0.999140526205432	ORAI1
0.886254612766592	4.2860200976482	3.21229071792896	0.0801983875412598	0.999140526205432	LIFR
0.650383533720377	5.17681990493636	3.19982290697369	0.0807661723085134	0.999140526205432	EIF1AY
0.606828839740182	5.41187771090515	3.21518043576216	0.0807881017708021	0.999140526205432	TSPAN5
-0.748398821108015	4.610016490189	3.19493737797761	0.0809898825974275	0.999140526205432	TAOK2
0.676590586402794	4.9479511666381	3.19437255694394	0.0810157905769974	0.999140526205432	GPC4
-0.634851395983118	5.05932779412272	3.19258986963453	0.0810976220431412	0.999140526205432	GNPTG
-1.01292717957659	4.0508656455691	3.18868054324301	0.0812773969977807	0.999140526205432	TRMT2B
-0.90070783001384	4.24396158394766	3.18525265420498	0.0814353988991452	0.999140526205432	EDEM2
-0.89090456197985	4.23922947414119	3.18387201486528	0.081499133714239	0.999140526205432	RPUSD2
-0.73547991774246	4.66737638133955	3.18196691335748	0.0815871709475794	0.999140526205432	BCL2A1
-0.530634957328321	5.50973882462285	3.18091792672976	0.0816356913529618	0.999140526205432	ISLR
-0.691404696280625	4.787275990249	3.17762484136336	0.0817882211639352	0.999140526205432	GMFB
0.500343058956551	5.74714231454129	3.1687415845068	0.0822012685481743	0.999140526205432	PDXK
-0.644074791742746	5.09755974542635	3.16744917314901	0.0822615562307326	0.999140526205432	COP1
-0.714604608270306	4.69818064521881	3.16695412833267	0.082284661895389	0.999140526205432	NIF3L1
-0.679664378481737	4.82358988965329	3.16634258543238	0.0823132149955112	0.999140526205432	C12orf73
0.672191786239393	5.03835295161508	3.16187895141889	0.082521959040503	0.999140526205432	NMD3
0.414421546861838	6.25081972029168	3.16050084327798	0.082586526465469	0.999140526205432	PITPNA
0.635157329398629	5.11449109317249	3.16046435817641	0.0825882366407733	0.999140526205432	ELP6
0.353492234866476	6.86671953800043	3.1578202678628	0.0827122792266114	0.999140526205432	HDAC2
0.659200380487042	5.08956267415078	3.1480374534375	0.0831730364908053	0.999140526205432	FBXL15
-0.629142935964519	5.05099347624654	3.14799672470517	0.0831749607492677	0.999140526205432	PPT1
0.327559480070036	7.21531439866917	3.14635894486621	0.0832523801191273	0.999140526205432	KPNB1
-0.603750264639159	5.18694590944068	3.1429594451318	0.083413335048567	0.999140526205432	ARF6
-0.281825048897385	8.01565723618346	3.13823874304079	0.083637422119366	0.999140526205432	CST3
-0.747855467909973	4.5509115385767	3.13752749278194	0.0836712428110044	0.999140526205432	SGF29
-0.923033875229914	4.18010836001836	3.13667627717062	0.0837117391166201	0.999140526205432	TUBE1
0.262042252680071	8.75085076795841	3.13656615456173	0.0837169797656977	0.999140526205432	ATP5PD
0.45891543101097	5.93381976293088	3.13510577501279	0.0837865128126714	0.999140526205432	ARL8A
0.553290323695031	5.40537350653283	3.13361845626255	0.0838573949398682	0.999140526205432	CHCHD6
0.591088118203727	5.24513268146046	3.13212232280639	0.0839287648569674	0.999140526205432	FAM45A
0.73292662246763	4.775927669629	3.13084796122954	0.0839896092162206	0.999140526205432	ZBTB45
0.653143435264374	4.97876012524275	3.13066136551208	0.0839985223657796	0.999140526205432	EIF2B5
0.872371690715309	4.35392266034625	3.12929525613335	0.0840638097976737	0.999140526205432	FAM214B
-0.697985761544046	4.74111495046467	3.12520263267542	0.0842597396105154	0.999140526205432	SLC35C1
-0.472026976146903	5.84695778374979	3.12468470561249	0.0842845712055251	0.999140526205432	LSMEM2
-0.456497273775416	5.93194299749603	3.1235113976907	0.0843408548065911	0.999140526205432	LARP6
-0.829751606075129	4.35382800594861	3.12018846093015	0.0845004845563903	0.999140526205432	PML
0.877535862685904	4.28133753963628	3.11992499746004	0.0845131554762707	0.999140526205432	ARHGEF1
0.333391922336885	7.02098579321421	3.11931684862752	0.0845424116948514	0.999140526205432	BUD31
-0.357062615129614	6.96834178755256	3.11925603701549	0.0845453377827787	0.999140526205432	COA1
0.747406556666721	4.57912376503396	3.1081752088871	0.0850804143111126	0.999140526205432	CCDC32
-0.665847120855337	4.86320773732331	3.10762366059518	0.0851071466386313	0.999140526205432	STK19
-0.453916178284393	5.92567184935055	3.10729939210013	0.085122867606632	0.999140526205432	SF3A2
-0.573010537510634	5.26820802794558	3.10035768328269	0.0854601920882405	0.999140526205432	NXF1
0.462525941989052	5.93108613274836	3.09598848642694	0.0856732758770234	0.999140526205432	CYP51A1
-0.884391718884142	4.2360805119147	3.09408364587577	0.0857663603375107	0.999140526205432	GMDS
0.691678934542514	4.79669597358827	3.09029746149618	0.085951717638719	0.999140526205432	CDC23
-0.796716060040016	4.39877271865806	3.07654887391947	0.0866285806821753	0.999140526205432	TMEM251
-1.00631462699856	4.05733710102238	3.07482134428665	0.086714051132808	0.999140526205432	GAS2
-0.674457691691389	4.90547156291455	3.06933009944969	0.0869863617980139	0.999140526205432	UBR7
0.74361679747862	4.69610815693376	3.06652429357463	0.0871258715851521	0.999140526205432	FAM83D
-0.447604847459145	6.00595596441651	3.06635738139308	0.0871341786650209	0.999140526205432	ARHGEF9
0.595570825424047	5.21613530342709	3.06406042544761	0.0872485864866944	0.999140526205432	SPSB3
-0.61139359794733	5.12514818058098	3.06373528104053	0.087264795030523	0.999140526205432	NAXD
0.462498951389197	5.8921723414742	3.06297728322331	0.0873025945551144	0.999140526205432	TMEM242
-0.3348541914696	6.97134625272601	3.05385552880712	0.0877589173184344	0.999140526205432	ERP29
0.278754128947002	8.03092593736484	3.05064780615353	0.0879200213517008	0.999140526205432	NDUFB8
-1.00298140712794	4.05572851670754	3.04651594370479	0.0881280282851764	0.999140526205432	TENT2
0.448487526082487	5.94945640400642	3.04030937915211	0.0884415185408845	0.999140526205432	CUL3
0.83187537661868	4.34076726555956	3.03976573697523	0.0884690371580646	0.999140526205432	CEP70
-0.488566721366185	5.74547930856816	3.03795638781213	0.088560693806221	0.999140526205432	CERK
-0.707452810046663	4.64003756320228	3.03646453108152	0.0886363473153644	0.999140526205432	AGPS
0.340245210765179	7.055723771896	3.03614486423172	0.0886525673660511	0.999140526205432	NDUFA7
-0.881311777544993	4.28976916994785	3.03393996850606	0.0887645356076151	0.999140526205432	MIA3
-0.643281212857432	4.97213810077269	3.03178896463377	0.0888739200883027	0.999140526205432	CDK5RAP3
0.558908846104881	5.41423825258709	3.0304552568899	0.0889418187843192	0.999140526205432	TP53I3
0.626613834326541	5.08723506895245	3.02968872759269	0.0889808689269749	0.999140526205432	MSI2
0.494295559207843	5.68612916773358	3.02831524306469	0.0890508879985594	0.999140526205432	BECN1
-0.446158769195114	5.9402433133086	3.02565946354678	0.0891864528563306	0.999140526205432	ISCA2
-0.463474417692591	5.90903473283944	3.01862980923199	0.0895464027053726	0.999140526205432	PPCS
0.612141333909099	5.08868933402906	3.01309641927926	0.089830884539059	0.999140526205432	GTPBP4
-0.693994100435485	4.84955318713467	3.01209862076534	0.0898822911393978	0.999140526205432	KLC2
-0.916485627283313	4.18011718060822	3.01084965264002	0.0899466845676881	0.999140526205432	PHAX
0.382810026815175	6.45363119083462	3.00901540665066	0.0900413472832302	0.999140526205432	SSB
0.751378354938003	4.5149935435821	3.00794703902078	0.0900965357159021	0.999140526205432	CTR9
0.588945993221548	5.19955061556973	3.00720115546168	0.0901350881809604	0.999140526205432	DCHS1
-0.315325441189002	7.18643751032504	3.0035153600801	0.0903258680161559	0.999140526205432	AURKAIP1
0.83319382757442	4.3345778128119	3.00290466548789	0.0903575218591571	0.999140526205432	MKI67
-1.1764015058675	3.84682882481632	2.99888386214178	0.0905662416375157	0.999140526205432	TAF1C
-0.670722082326337	4.81634427233432	2.9945489481553	0.0907918739051269	0.999140526205432	DIP2B
-0.768540095404661	4.49275104133193	2.98957202422069	0.0910517020364169	0.999140526205432	POLR3C
0.843457446164732	4.34697431751299	2.98374716772146	0.0913568597556783	0.999140526205432	UNC5B-AS1
0.372345740429297	6.51269365560636	2.98007730307568	0.0915497100875095	0.999140526205432	QSOX1
-0.826438120031981	4.33984948415323	2.9788158231583	0.0916161061513713	0.999140526205432	TMEM94
0.875494365347868	4.2907010450959	2.97861190079548	0.0916268443746489	0.999140526205432	C1QTNF6
0.522545744710678	5.49210280029213	2.97413679711645	0.0918628527545802	0.999140526205432	MED4
-0.691973922951315	4.73817351532328	2.97148503891759	0.0920030238579786	0.999140526205432	TLK2
-0.625968674297104	4.97204582271717	2.95308642727249	0.092982219437721	0.999140526205432	SGMS1
0.509311548516194	5.66696852348682	2.94842991387847	0.0932318999765318	0.999140526205432	PXMP2
-0.698287551081692	4.6415070699166	2.94573463903569	0.0933767643088191	0.999140526205432	YEATS2
-0.562152997521755	5.26547292386108	2.94549390439072	0.0933897155166726	0.999140526205432	SCAF11
-0.776595295053451	4.62583509021727	2.96025652251841	0.093812133758948	0.999140526205432	DROSHA
-0.42433503242398	6.10803621193638	2.93512026092534	0.0939497293661506	0.999140526205432	SLC25A23
-0.687584045686592	4.67740276634484	2.93270362354464	0.0940807321127012	0.999140526205432	TESK1
-0.335430752012681	6.83318549406705	2.92858703434191	0.0943043608704839	0.999140526205432	MRPL52
-0.434199658398303	6.02678805791942	2.92373335467514	0.09456880048429	0.999140526205432	WBP11
-0.709990896444926	4.59539344929887	2.92177555431294	0.0946757022232881	0.999140526205432	OSGEP
1.03314963019777	4.06956808901999	2.92164407635299	0.0946828861876075	0.999140526205432	TOR1B
-0.567388772352988	5.23933622014418	2.91202842872899	0.0952099542532731	0.999140526205432	TM9SF1
0.640686407728424	5.01505986023526	2.9098613183905	0.0953291972518724	0.999140526205432	FILIP1L
0.369963702623077	6.54268980659074	2.90969014336045	0.095338623148584	0.999140526205432	ACTR1B
0.885506555575072	4.38171577164468	2.92384219896496	0.0956135837199878	0.999140526205432	ABCB8
-0.272628247686214	8.14248724597603	2.90356990160174	0.0956763304638986	0.999140526205432	MYH10
0.702940273787176	4.68741579517975	2.89778068690599	0.0959970133146403	0.999140526205432	RGL1
1.03015905145488	4.06796611372269	2.89223997423163	0.0963050659666678	0.999140526205432	ZBED4
0.830543330347621	4.34697290901131	2.8880029466905	0.0965413883748799	0.999140526205432	LSR
0.738830782140013	4.51500877978794	2.88571666031243	0.0966691787540793	0.999140526205432	F11R
-0.362663815747234	6.59252283569914	2.88357310818684	0.0967891643867353	0.999140526205432	LRRFIP1
-0.594576993757332	5.07193538827984	2.87865788951526	0.0970649291034957	0.999140526205432	UBE3C
0.479074702466904	5.66916044127667	2.87840294887458	0.0970792565155687	0.999140526205432	PPP3CB
-0.512115061787102	5.58855384258022	2.87515105637901	0.097262219097309	0.999140526205432	LSS
-0.434134872002223	6.01260404399039	2.87310136631651	0.0973777415150308	0.999140526205432	MACF1
-0.335310558619579	6.96432318420023	2.87005380158677	0.0975497913698158	0.999140526205432	RBFOX2
-0.422487224198102	6.06118833198635	2.86837241968896	0.0976448603538507	0.999140526205432	SURF1
0.429098124338325	6.01842683815	2.8636065845646	0.0979148996709577	0.999140526205432	ZNF622
0.608422393236013	5.12555361569148	2.86068220710734	0.0980810164497899	0.999140526205432	MUS81
0.257509435054035	8.33848265144186	2.85973485462418	0.0981348981963159	0.999140526205432	SEPT2
-0.398078250613407	6.21457552449582	2.85923258614094	0.0981634788375362	0.999140526205432	EMC7
0.442279448902678	6.25159105626861	2.88245802799486	0.0982170196801853	0.999140526205432	CAPN1
-0.495680006267543	5.5518699119465	2.85507950716379	0.0984001623378271	0.999140526205432	PDRG1
0.716066722502765	4.8839417674418	2.86664168478558	0.0987779190838042	0.999140526205432	MYEF2
-0.511026879145342	5.58645229513314	2.84583926225943	0.0989290777731524	0.999140526205432	TIMM22
-0.728425051692419	5.67865004731859	3.17510846722221	0.0990164360390238	0.999140526205432	MCCC2
0.547001034640401	5.34054933353423	2.8428381172671	0.0991015546307072	0.999140526205432	RTCA
0.69428575526644	4.67162770896106	2.84215530062933	0.0991408437486915	0.999140526205432	NDUFAF1
-0.389364475542514	6.61805369326179	2.86292770572288	0.0991730824150686	0.999140526205432	MAPK1
0.358838167166198	6.59345954221818	2.84154778678705	0.0991758147497384	0.999140526205432	TARS
1.03680297426543	3.97710991631012	2.84105566561047	0.0992041534875306	0.999140526205432	CNPY4
0.472137964157026	5.71129110948678	2.83593251759375	0.0994997131959341	0.999140526205432	AC018521.5
0.793794100117712	4.39969019496998	2.8357325482365	0.0995112697885436	0.999140526205432	CUL4B
0.297828905720382	7.42647089712716	2.83385176755704	0.0996200377524364	0.999140526205432	SQSTM1
-0.483725343928031	5.62299935519165	2.83353375765528	0.0996384419450325	0.999140526205432	RDH14
0.687524866474568	4.67459179763474	2.83198823576277	0.099727940676671	0.999140526205432	DYRK1B
-0.298390900438909	7.32095185495668	2.83050063191544	0.0998141712591739	0.999140526205432	PHLDA1
0.714902062272539	4.56033585079591	2.82915838505932	0.0998920483681551	0.999140526205432	SEH1L
0.815866919268673	4.50354917675196	2.83680866727738	0.100485739393587	0.999140526205432	MFN1
-0.626224268068742	4.9941006957204	2.81824274490929	0.10052792934671	0.999140526205432	PIAS1
0.389810442354514	6.29596346384737	2.81806435026225	0.100538359496155	0.999140526205432	WDR45B
-0.549471808652191	5.25028780749989	2.80659587414226	0.101211458207711	0.999140526205432	GGPS1
0.305757184256664	7.2778546716565	2.8060318289251	0.10124469392842	0.999140526205432	FBLN5
0.318064492017715	6.98581913973586	2.79864444225901	0.1016811286913	0.999140526205432	LOX
0.796675400930406	4.40123190616061	2.79858746593536	0.101684503018695	0.999140526205432	DDX46
0.333232751330189	6.9671817037711	2.79639447237941	0.101814475707364	0.999140526205432	PLK2
0.57457499197332	5.15535697223104	2.79122854162568	0.102121389689983	0.999140526205432	TMEM47
0.723640650756964	4.71313920140889	2.79213622886514	0.102376058028096	0.999140526205432	ZNF638
-0.518282557570972	5.41230816392666	2.78482852274152	0.102503075124766	0.999140526205432	MAP3K7
0.383321706832064	6.48934961124044	2.78477989808033	0.10250598118347	0.999140526205432	WRB
0.438052561428948	5.98288680850253	2.78369135115695	0.102571062736541	0.999140526205432	MRPL54
0.746712483275772	4.44292113356987	2.77598646333652	0.103033058505398	0.999140526205432	RRP15
0.344844308559741	6.68337130577067	2.77557675849573	0.103057690856875	0.999140526205432	TMEM106C
0.551506293171216	5.25648501839742	2.77453663722967	0.103120255176548	0.999140526205432	ANKRD10
-0.785437973353269	4.32090747270548	2.77131743638831	0.103314165963985	0.999140526205432	DHX38
0.68961576943382	4.67901275219942	2.76715592737664	0.103565449493278	0.999140526205432	FAM220A
-0.759750672887149	4.45117022549394	2.76193998595235	0.103881380612757	0.999140526205432	DMAC2L
0.318550947785488	7.00285252348861	2.76081091868669	0.103949912187517	0.999140526205432	AL136171.1
0.833210644261331	4.25588785289618	2.75828219734622	0.104103585160886	0.999140526205432	INPP5K
-0.524529740152455	5.40907573512685	2.75775057725952	0.104135924985721	0.999140526205432	RAB31
-0.76690192578413	4.37304582679585	2.75364928623002	0.104385800091436	0.999140526205432	SNCAIP
-0.463818510554911	5.69661870774374	2.74747212616217	0.104763432789021	0.999140526205432	PIK3R1
-0.74104673792111	4.43098492256484	2.74567653015071	0.104873494485195	0.999140526205432	FOPNL
-0.809513858933405	4.26830878012713	2.74515094279457	0.104905735338976	0.999140526205432	SRR
-0.283908454828245	7.48679323658506	2.74512806910121	0.104907138724081	0.999140526205432	NDUFAF3
0.698493399276546	4.68046661345909	2.7436832811046	0.104995824910359	0.999140526205432	GNA13
-0.530070196229104	5.30932332623433	2.74305306201479	0.105034536599136	0.999140526205432	CASC10
0.570298621570083	5.15000535163485	2.74089865878136	0.105166994703319	0.999140526205432	ASMTL
0.332930949914214	6.75683866640544	2.73978056685415	0.105235812425059	0.999140526205432	VPS35
-0.682278838133093	4.8351187398375	2.74604352810285	0.105433478901902	0.999140526205432	ITGA9
-0.314970630348279	7.35927886859139	2.74231193564972	0.105653168217374	0.999140526205432	IFI27L2
-0.624567216621205	4.88375162457513	2.73295567657532	0.105656987935076	0.999140526205432	KCTD12
-0.685962365626335	4.63254958271929	2.73169768406952	0.105734829220626	0.999140526205432	UBTD1
0.479012560255402	5.66859925743365	2.72987770315201	0.105847560010075	0.999140526205432	CCDC107
-0.337803711058717	6.73920254392243	2.72845394847428	0.105935843318932	0.999140526205432	CPVL
-0.912822900123141	4.08381698383894	2.72590547720335	0.106094075977709	0.999140526205432	CCDC71
-0.754172910517731	4.37304466495225	2.72448139144537	0.10618261313405	0.999140526205432	ROR2
-0.640603373929998	4.79724130874086	2.72361006426325	0.106236825938697	0.999140526205432	PIP5K1A
-0.839515937694658	4.21194929248124	2.72218314674034	0.106325674653208	0.999140526205432	NIP7
-0.806198417949859	4.26359645499839	2.71808722374772	0.106581180807741	0.999140526205432	MYLIP
0.507601507589057	5.44065687809975	2.71802928255511	0.106584800207843	0.999140526205432	AFDN
-0.716920252452206	4.48094287242772	2.70813274643481	0.107205056440859	0.999140526205432	MTRF1L
-0.343362115638752	6.64232332239958	2.70662164633479	0.107300123273683	0.999140526205432	CAPN2
0.408237008398633	6.13076503869589	2.70397439227126	0.107466898966032	0.999140526205432	TMEM134
0.309185518110454	7.05054659204288	2.69592896664776	0.107975565925283	0.999140526205432	SDC2
-1.68333882267556	5.13345258700891	4.02694466283724	0.108077378152646	0.999140526205432	CLCC1
-0.766828223250798	4.36995265507957	2.68978545286054	0.108365826978472	0.999140526205432	TIMELESS
-0.855714965996138	4.20717785304912	2.68962422751728	0.108376090221642	0.999140526205432	GTF2IRD2B
-0.478226183119393	5.7347276556573	2.689484007923	0.108385017183723	0.999140526205432	ATG4B
-0.441972934805892	5.88653653146428	2.68927649435338	0.108398229892662	0.999140526205432	TAF1D
0.517770981016517	5.38840053882148	2.6860298307177	0.108605188404944	0.999140526205432	PACS2
0.394553182387537	6.2229094329464	2.68582927414438	0.108617987593097	0.999140526205432	SMIM10L1
-0.731316798546199	4.5819629471855	2.69477871327684	0.108622530778379	0.999140526205432	PKP4
0.826705574036626	4.25588272194747	2.68414787059629	0.108725359413303	0.999140526205432	RAD17
0.457060130220744	5.82405318444405	2.68316575238447	0.108788131744332	0.999140526205432	CADM4
0.365386785767592	6.46992289738319	2.68028453549801	0.108972523170667	0.999140526205432	DEGS1
-0.675386048213012	4.67147153982819	2.68009350906498	0.108984760981883	0.999140526205432	MFSD5
0.312423896361101	7.05330709393254	2.67859673500784	0.109080703559011	0.999140526205432	PSMC3
-0.502367230704339	5.44662585065018	2.67837174315003	0.109095133737236	0.999140526205432	NDST1
0.648867218891583	4.83549710975411	2.67254961543327	0.109469299823662	0.999140526205432	AGTRAP
0.603607069707334	5.05331996076254	2.67181191059314	0.109516813347913	0.999140526205432	VPS26A
0.309770815872771	7.01031333255832	2.67106133998248	0.109565179580539	0.999140526205432	LMOD2
-0.410559845664446	6.35327196267924	2.68847627081657	0.109677552976408	0.999140526205432	TMC6
-0.682583278096432	4.56846131696826	2.66890418903767	0.109704320070453	0.999140526205432	MFSD14B
0.376272363424199	6.28629571408837	2.66838975549397	0.109737531705164	0.999140526205432	MSMO1
-0.685937792116238	4.6295797324351	2.6674858044974	0.109795918132188	0.999140526205432	PDPK1
-0.691185482041899	4.52165166556385	2.66457208238241	0.109984356725196	0.999140526205432	C3orf38
0.661614368667796	4.71082065750974	2.6640054438453	0.110021045524264	0.999140526205432	FLYWCH2
0.530013612761556	5.31884576128397	2.66382896419876	0.110032475097383	0.999140526205432	GPS2
-0.630518574805032	4.91913231010058	2.66277485338654	0.110100771923019	0.999140526205432	STAG3L4
-0.406802953772502	6.08957706112301	2.6627404270975	0.110103003247195	0.999140526205432	MRPS25
-0.763615914453141	4.36840738697337	2.65970444813053	0.110299981214022	0.999140526205432	ZBTB17
0.745147669980211	4.43530176753406	2.65895983170987	0.110348354001685	0.999140526205432	ISY1
-0.756596962446235	4.44657817823169	2.65560321005005	0.110566711175202	0.999140526205432	TNFRSF19
0.325730057838498	6.83171473406225	2.65550294363086	0.110573241327878	0.999140526205432	TIMM17B
0.949977641896117	4.15174049177304	2.65719759135948	0.110637383960417	0.999140526205432	EEF1B2P6
0.757501252624675	4.45208875538053	2.654379474543	0.110646440641554	0.999140526205432	KAT14
-0.665961922031221	4.61529423264622	2.64659892456061	0.111154895712189	0.999140526205432	IL1R1
0.671145248437501	4.66580097845691	2.64328329652281	0.111372377786361	0.999140526205432	SLC30A3
-0.64536115491981	4.83461310138274	2.64046516889931	0.111557608062523	0.999140526205432	EVI5L
0.61332765475317	4.90854616835867	2.64031211978586	0.111567677728815	0.999140526205432	CBX6
-0.330217075071496	6.7772544880969	2.6391526721955	0.111643995680105	0.999140526205432	UBXN1
-2.10212224094759	11.4486735124297	6.81720145582479	0.111675396668014	0.999140526205432	MT-CO2
-0.773182793595309	4.36995308263903	2.63146024201167	0.112151839705611	0.999140526205432	DPY19L3
-0.294825793225085	7.20286385996765	2.63065110217908	0.112205410739795	0.999140526205432	CAPRIN1
0.906675710021588	4.10901406582428	2.62912814680715	0.112306320684425	0.999140526205432	TFPI2
0.425913128615255	5.95744714929985	2.62600034040949	0.11251389115226	0.999140526205432	EIF2S1
-0.593357511038696	4.94918444694262	2.62504261594614	0.112577535917875	0.999140526205432	RBM7
-0.618919057051523	4.83881468019016	2.62432174686641	0.112625467705487	0.999140526205432	PBRM1
0.452917897830272	5.8253948023338	2.61623478897106	0.113164779164412	0.999140526205432	TRIP6
-0.328347918155143	6.76263709941005	2.61393490678441	0.113318692992218	0.999140526205432	JPH2
-0.62137868258499	4.87088482276229	2.61091507214356	0.113521150167267	0.999140526205432	NDRG3
-0.42021337995206	6.24025983792001	2.62770617306452	0.113630904482068	0.999140526205432	SIVA1
0.549011875062138	5.27387104504324	2.60859992419562	0.113676642556771	0.999140526205432	ZNF444
0.766329015699512	4.43985820339454	2.60595253459031	0.113854746866697	0.999140526205432	BTBD3
-0.452028568488751	5.69955359332961	2.60247081155308	0.11408946574526	0.999140526205432	TOP2A
-0.349860017589767	6.50256455326514	2.60154466663041	0.114151994255009	0.999140526205432	CORO1C
0.307248684109035	6.96465141987445	2.60067512678057	0.114210736644356	0.999140526205432	ID3
0.769185475331217	4.44138117425468	2.59142540690339	0.114837746139094	0.999140526205432	CCDC86
0.410658670238991	5.97779615978023	2.58359936627327	0.115371316060039	0.999140526205432	GATM
0.434105859520039	5.80161573087604	2.5828662002049	0.115421447146367	0.999140526205432	S100A16
-0.512806619771142	5.33533892099585	2.58118569727878	0.115536447293754	0.999140526205432	HS2ST1
-0.354072831326816	6.53064060719054	2.58104965373197	0.115545762742043	0.999140526205432	EVL
-0.559519020930969	5.21057753027484	2.58087339579978	0.115557833105332	0.999140526205432	OAT
0.605355125013529	4.94155096739833	2.5690322186689	0.116372037074869	0.999140526205432	CDS2
0.429294014515487	5.96179684010577	2.56434026686861	0.116696467472151	0.999140526205432	LSM8
-0.443187596253551	5.918424060518	2.56402651395934	0.117043428216854	0.999140526205432	INHBA
-0.638955014063064	4.70045847515507	2.55702781243172	0.117204156837577	0.999140526205432	PDGFC
0.462709807686554	5.60874706260952	2.55475221061977	0.117362661724069	0.999140526205432	MOB2
-0.564144613499995	5.05036441114753	2.55363979960603	0.117440234755557	0.999140526205432	GPR137
-0.320122411909087	6.93763766554475	2.5468593234564	0.117914334105727	0.999140526205432	ISCU
-0.741441483238137	4.37304350333913	2.54115992747811	0.118314535259877	0.999140526205432	CNOT6
-0.52345759565292	5.28390623811717	2.53684609145085	0.118618477303198	0.999140526205432	DHRSX
-0.642181273642868	4.70784067222106	2.53505309231412	0.118745070045108	0.999140526205432	TMEM60
-0.629916463106102	4.70190596886921	2.5335803202232	0.118849169062741	0.999140526205432	ORAI3
0.514127303626857	5.31254783100597	2.5329823632107	0.118891463859312	0.999140526205432	ANXA4
-0.315928864414952	6.84106876085352	2.53016981860045	0.119090632241977	0.999140526205432	LSM3
-0.631644836403707	4.79287575724193	2.52751666288567	0.119278863409531	0.999140526205432	ARMC8
-0.544702919693102	5.24167213662838	2.52571659797448	0.11940676481646	0.999140526205432	AC093512.2
-0.602850247236151	4.96349554980168	2.52484260961309	0.119468921555817	0.999140526205432	SNX9
-0.511730739910059	5.32617211796807	2.52432027903358	0.119506086590253	0.999140526205432	KIF20A
0.315706211402419	7.04384262700538	2.52369807874411	0.119550374847331	0.999140526205432	S100A13
-0.478826007661636	5.62220950649288	2.52109892878633	0.119735585657517	0.999140526205432	UBTF
0.353327848374636	6.46537733996593	2.52065003780091	0.11976760606229	0.999140526205432	CD276
-0.519798610759185	5.32755206455343	2.52058352246875	0.119772351584027	0.999140526205432	SYNGR1
-0.647054191752264	4.82201880900981	2.51935726312517	0.119859877339273	0.999140526205432	LIMD2
-0.517729302697378	5.29193831573101	2.5190861946901	0.119879235053917	0.999140526205432	CEP57
-0.598516348330694	4.92324325373878	2.5166978790937	0.120049945682707	0.999140526205432	NSUN5
0.742285201590191	4.36391164393659	2.5165452549062	0.120060864317567	0.999140526205432	ANKFY1
-0.468814098036673	5.62525240582141	2.51242419674086	0.120356112175027	0.999140526205432	MCM4
-0.503141105508801	5.3532919334999	2.50717908185322	0.12073309426881	0.999140526205432	RMDN1
-0.471658835482354	5.54413286966253	2.50566070053238	0.12084247702502	0.999140526205432	STX8
-0.548716152745826	5.34724164151292	2.51694232260926	0.121005712669447	0.999140526205432	LARGE1
0.738767632767091	4.36545386395689	2.50270490406882	0.121055735377452	0.999140526205432	BRIX1
-0.513857329931404	5.35599086802936	2.50249648432437	0.121070788951309	0.999140526205432	MED29
0.338024431475027	6.55406012743741	2.50207346195177	0.121101349261989	0.999140526205432	LMAN2
0.695705098748771	4.49062594422993	2.50175001952045	0.121124721599887	0.999140526205432	SRRD
-0.55132586011374	5.20918425602078	2.49654700095514	0.121501408759265	0.999140526205432	MEF2D
-0.678738024032291	4.52163571021126	2.49053297020414	0.121938484262676	0.999140526205432	ALG11
0.837205461331995	4.17070551519582	2.4867523064481	0.122214169682699	0.999140526205432	TRRAP
-0.382534250136654	6.15460728456914	2.48416234454404	0.12240344152249	0.999140526205432	MOCS2
-0.581795639561442	4.94912539370032	2.48373365299733	0.122434802264452	0.999140526205432	NADK
-0.374851660094431	6.19608095012657	2.48314559668574	0.122477836245931	0.999140526205432	ADD3
-0.650264626015554	4.65184534661569	2.48187370901278	0.122570972336844	0.999140526205432	LRP12
0.464425397710229	5.67528250330766	2.47595731098767	0.123005278886567	0.999140526205432	RMND5A
-0.453451110266347	5.68830800492786	2.47358936085642	0.123179597739929	0.999140526205432	SHISA4
-0.629781432479357	4.69601870649166	2.4711388830074	0.123360290239411	0.999140526205432	TBC1D16
0.535912992859107	5.20477484894831	2.46695011548537	0.123669864453384	0.999140526205432	TBC1D9
0.399137296632302	5.99188370647724	2.46506297467882	0.123809626165252	0.999140526205432	LUC7L2
0.404613463178852	6.04478018348397	2.46496327482525	0.123817014976645	0.999140526205432	OPTN
0.643912730063497	4.6468100577641	2.46224553783845	0.124018622921341	0.999140526205432	EBLN3P
-0.610053627779706	4.83734206052593	2.46141829990247	0.124080064061048	0.999140526205432	RACGAP1
0.417254815477499	6.62990551765021	2.56715409271802	0.124278128845218	0.999140526205432	HRC
-0.521493393240553	5.20674461926968	2.45774052143199	0.124353645448306	0.999140526205432	LMNB1
-0.365173620692665	6.31953468729486	2.45704598143016	0.124405388321728	0.999140526205432	CORIN
-0.407123907780938	5.91010615940503	2.45457309019885	0.124589818128706	0.999140526205432	HADH
-0.306078048571685	6.8832049968276	2.45303415560901	0.124704751238755	0.999140526205432	P4HA1
-0.467480489515367	5.60388573607422	2.45182174572929	0.124795384019945	0.999140526205432	CYTOR
-0.459380747494122	5.64371474835602	2.44989676766338	0.124939439651875	0.999140526205432	ENC1
-0.573231777671006	5.01002023242645	2.43907225682036	0.125753055076617	0.999140526205432	CASC3
-0.658933402447935	4.83653076254861	2.44955866750418	0.125939094563418	0.999140526205432	EIF2B3
-0.624579631989992	4.78228209651603	2.43605378096049	0.125981020015578	0.999140526205432	GOLGA5
-0.396113924509653	6.03225918746702	2.43601622637746	0.125983859245566	0.999140526205432	SAMM50
0.673598747078267	4.53371337847805	2.43343911975272	0.126178871308855	0.999140526205432	REST
-0.294040012675039	6.98850770670037	2.43096876097589	0.126366131248142	0.999140526205432	MMADHC
0.650662891015334	4.64384407014449	2.43030565685377	0.126416450691128	0.999140526205432	FZD6
-0.3918682839035	6.00471791592868	2.42763643860815	0.126619236451686	0.999140526205432	UBE2V2
-0.439698893943394	5.71732868428379	2.42330945547871	0.126948760524517	0.999140526205432	PTGES3L
0.366548166603556	6.2943501618746	2.42066111919998	0.127150932420628	0.999140526205432	SLC2A4RG
0.256863740467189	8.02107345535096	2.4197465319145	0.127220837244436	0.999140526205432	NDUFV2
0.376318248245902	6.28442677473599	2.41885767238824	0.127288817949161	0.999140526205432	CTXN1
0.580036781711681	4.99294609745703	2.41830819530001	0.127330863293345	0.999140526205432	PLAA
-0.612580356537146	4.82295956234372	2.41745911300343	0.127395865479732	0.999140526205432	BCL2L12
-0.349887555810551	6.39121149830645	2.41611423614906	0.127498901707163	0.999140526205432	PSME3
0.243026575283763	8.79597529803073	2.4234414597141	0.127525080925696	0.999140526205432	MYOZ2
0.568894904712817	4.97666989144013	2.40628625434213	0.128254777110893	0.999140526205432	CLEC11A
-0.333800601078333	6.50603558518856	2.40350709063898	0.128469458027816	0.999140526205432	FLOT2
-0.315279819841468	6.83788970444704	2.40346069263818	0.128473045621929	0.999140526205432	TMEM263
0.32919188450999	6.61775392249006	2.40139509589262	0.128632878896852	0.999140526205432	DENND5A
0.573416638619377	4.98223043193427	2.39758523140103	0.12892828198306	0.999140526205432	WDR46
0.991536071011046	3.9401910096367	2.39712936631577	0.128963680374124	0.999140526205432	LPGAT1
-0.375072814623384	6.20431007201748	2.39581183938812	0.129066050585035	0.999140526205432	MRPS11
-0.42536726537957	5.72186405536705	2.39338121553579	0.129255152571949	0.999140526205432	RFXANK
0.261102256136464	7.81532574770341	2.39113196491178	0.129430427917116	0.999140526205432	RBPMS
-0.323547019630257	6.59019247664341	2.3769808784447	0.130539465027305	0.999140526205432	SUPT4H1
0.835927099119802	4.17704958599369	2.37183631410292	0.130945360588823	0.999140526205432	HMMR
0.730124450152312	4.3608303499426	2.37079398027718	0.131027775645415	0.999140526205432	LDLRAD4
0.371843788464504	6.16083100381339	2.36632346162639	0.131381928460526	0.999140526205432	MCUR1
-0.387288653146756	6.09545232490989	2.36367232119192	0.131592471933034	0.999140526205432	AC107983.1
0.582956920701048	4.89131848032768	2.3590642288639	0.13195935539006	0.999140526205432	PRR5
0.331923899629035	6.51895697374561	2.35254382344883	0.132480509033886	0.999140526205432	MAPKAP1
0.269901575874108	7.44179339102947	2.35209789253719	0.132516237400621	0.999140526205432	QPRT
0.452565109640249	5.57809418794239	2.3502736359601	0.13266251418688	0.999140526205432	FAM98A
-0.329519064724134	6.74674115598667	2.35246054864369	0.132812210400387	0.999140526205432	PPP1R12B
0.60022940097751	4.91427186990277	2.34732209005531	0.132899576586858	0.999140526205432	HMBS
-0.298887149387843	6.98771274467258	2.34305928136623	0.13324282031504	0.999140526205432	CDC37
0.69533600755493	4.41423281885217	2.34152524980848	0.13336659162266	0.999140526205432	PRKD3
0.780736027261201	4.22990056133516	2.3388908582467	0.133579453764874	0.999140526205432	STX6
0.228627144466634	8.53881995549562	2.33845319285842	0.133614855650941	0.999140526205432	ATP5PB
-0.387774227340607	6.03041123376414	2.33707980532659	0.133726016583602	0.999140526205432	LYPLA1
-0.58581654277191	4.81852743379315	2.33700451186824	0.133732113864478	0.999140526205432	USP13
-0.416485311813101	5.7593412276363	2.33529649820818	0.13387051544397	0.999140526205432	PIP4K2B
-0.716277527413132	4.34683766483596	2.32860521135321	0.134414310627909	0.999140526205432	AGAP1
-0.288467819061047	7.01065707130478	2.32606273571214	0.134621603937453	0.999140526205432	CNN2
0.614356144196769	4.69103133820981	2.32477494531012	0.134726741027855	0.999140526205432	TMX3
0.242809323368006	8.11397793809606	2.32461079021417	0.134740149704334	0.999140526205432	TMED9
0.652048927766643	4.69918303158378	2.32364600662094	0.134818987260045	0.999140526205432	LRRC20
-0.416845805459827	5.7710411233776	2.32237870276583	0.13492262632884	0.999140526205432	FAM229B
0.65436989477084	4.58878490245071	2.32116166227265	0.135022241550175	0.999140526205432	KRCC1
-0.695195816616877	4.39801953874348	2.32029571001102	0.135093171809547	0.999140526205432	SLC29A2
-0.558792358165458	5.00182605244469	2.31990029298292	0.135125574785649	0.999140526205432	DVL1
-0.399945515066235	5.86171795244076	2.31868500125257	0.135225219718006	0.999140526205432	SAMD1
0.392316909613867	6.05638287557949	2.31661130476388	0.135395443613428	0.999140526205432	INPP5F
-0.582887924803263	4.81995776094674	2.31374387827955	0.13563123069194	0.999140526205432	SRRM1
-0.433817772679954	5.72397148826756	2.31348581251079	0.135652474582321	0.999140526205432	MMP23A
0.333070251617334	6.55519010513992	2.30887546972953	0.136032645421222	0.999140526205432	SNX6
0.241489798830567	8.02180292188312	2.3079242606447	0.136111235728905	0.999140526205432	TTN
0.778423813103244	4.22518505579107	2.30714353797964	0.136175779423101	0.999140526205432	SAV1
-0.489134831189917	5.36439025855973	2.30623537351752	0.136250903481682	0.999140526205432	PPP4R2
-0.626002091923211	4.65474745079787	2.30587298728812	0.136280893723055	0.999140526205432	SPRY4
-0.567214439184679	4.90111424303659	2.30423734964095	0.136416350304593	0.999140526205432	CHN1
-0.544459151342451	5.03418733174327	2.30359974381899	0.136469196290099	0.999140526205432	CHMP2B
-0.6148581799688	4.70628628813635	2.30283947533963	0.136532239738698	0.999140526205432	MTURN
-0.356156186965769	6.23893355183332	2.30102828730315	0.136682563932811	0.999140526205432	TM2D2
0.275215633316947	7.22073631052327	2.29920914290842	0.136833741216967	0.999140526205432	ANXA11
0.783055623659466	4.23462559972603	2.29704289118802	0.137014016706947	0.999140526205432	ODF2L
0.648541203137092	4.63942938927248	2.29696574463416	0.137020441908939	0.999140526205432	SLC41A3
0.527336279162165	5.12231415433977	2.29347336932999	0.137311672129873	0.999140526205432	TRAPPC6A
-0.288663687648514	7.04406887988953	2.29331297714361	0.137325064474469	0.999140526205432	PSMB2
-0.329084453395671	6.57512044969928	2.29216148309005	0.137421255724233	0.999140526205432	HCN4
-0.610180973230025	4.73311425202991	2.29099877535486	0.137518462842686	0.999140526205432	PPFIBP1
-0.368325926398017	6.12296487886311	2.29087056680959	0.137529186471201	0.999140526205432	LRP1
-0.388135544608478	6.06734693482973	2.29053867280227	0.137556951269574	0.999140526205432	RBM20
-0.564255717681393	4.89967518877378	2.2846252637276	0.138052730367055	0.999140526205432	DCLK2
0.397097541772629	5.91008842555924	2.28335808020548	0.138159239729359	0.999140526205432	CNP
-0.297306292006658	6.81581980815655	2.28278889001109	0.13820711228918	0.999140526205432	RHOB
0.749091164924234	4.28679466250016	2.28073004996366	0.138380434443692	0.999140526205432	ARL6IP6
0.673273697519071	4.55028312915223	2.28023701646642	0.138421977501954	0.999140526205432	THBS4
-0.813296183783466	4.11926918823103	2.27823159488382	0.138591103460261	0.999140526205432	NCOA7
0.739681801236789	4.2852287341835	2.2775622939795	0.138647601779944	0.999140526205432	GRAMD4
0.428325930880677	5.71221240243736	2.27642427098982	0.138743728021565	0.999140526205432	EGFL7
0.462564723159918	5.45798929111872	2.27567343952895	0.138807191329585	0.999140526205432	NIPSNAP3A
-0.698312790891576	4.39647955463869	2.27510748553078	0.138855050271941	0.999140526205432	PAPPA
-0.70026477660927	4.34528671402293	2.27287307368969	0.139044186317787	0.999140526205432	VWC2
-0.490425818572716	5.33121314558504	2.2598702994228	0.140150772186178	0.999140526205432	SPRYD3
0.283676136159345	7.15661797385461	2.25417559368331	0.140638625621446	0.999140526205432	PGM1
0.522453661337811	5.23344464104089	2.25410845402164	0.140644389068071	0.999140526205432	PCDHB2
-0.813133366801336	4.11286725963468	2.25285746082395	0.140751827757332	0.999140526205432	MYC
0.555868140508212	5.07212750143588	2.25227104869031	0.140802223186439	0.999140526205432	ZEB2
-0.844141103178874	4.05168330588786	2.25067544827126	0.140939452804116	0.999140526205432	OSBPL11
-0.854056201105843	4.05004910253544	2.24873654915756	0.141106416670061	0.999140526205432	NTM
0.469069880939867	5.39020962411887	2.24823101970507	0.141149986885633	0.999140526205432	LLPH
0.542565751235979	5.04562869177422	2.24811184007124	0.141160260929002	0.999140526205432	BET1
0.416408030919669	5.77870179742802	2.24757861773847	0.141206238714677	0.999140526205432	PRPF19
0.914827774843909	4.00600528794508	2.24679019221976	0.141274253564623	0.999140526205432	HSPA14.1
-0.723086517323804	4.28901137165995	2.24636534416742	0.14131091955242	0.999140526205432	CHSY3
0.964242959317292	4.05907217494425	2.25867708007465	0.141337604296045	0.999140526205432	CRYZL1
0.746758839574382	4.28211479586017	2.2447197569983	0.141453044168584	0.999140526205432	PHF3
-0.526048167023783	5.10907600286732	2.24038893600946	0.141827878050527	0.999140526205432	RAD1
-0.271372140737996	7.21954752861271	2.23990257001178	0.141870045126272	0.999140526205432	UBE2M
-0.810033526138978	4.12087840086338	2.23970326183854	0.141887328996857	0.999140526205432	AC044860.1
-0.460859337862062	5.44358619357498	2.23920084598289	0.14193090900781	0.999140526205432	ATP6V1H
0.539402527351475	5.04702541198574	2.23843881241712	0.141997038152176	0.999140526205432	HINT3
-0.726260727597279	4.28744768604593	2.2381269665339	0.142024110396946	0.999140526205432	POC1A
0.364329720631457	6.10733239401679	2.23714093940212	0.142109749697949	0.999140526205432	ETV1
0.443642331584596	5.7261112298299	2.23685031472795	0.142160966397272	0.999140526205432	SBF1
0.653594600761453	4.53975466139044	2.2355535378725	0.142247746065098	0.999140526205432	CTDSPL2
0.653594600761453	4.53975466139044	2.2355535378725	0.142247746065098	0.999140526205432	B4GALT5
0.303231599924264	6.75016880832121	2.23135622407293	0.142613378104151	0.999140526205432	GATD3A
-0.350155991400276	6.20658284954576	2.22582707361445	0.143096694703555	0.999140526205432	CFDP1
-0.739107017344777	4.28744046506076	2.2255248296831	0.143123169377591	0.999140526205432	PHTF1
0.7275209013061	4.3731804484763	2.22417859759652	0.143241160003229	0.999140526205432	IQSEC2
0.291104996321753	6.85797409005965	2.22397902279385	0.143258661369297	0.999140526205432	SELENOF
0.842352246256912	4.07672807264902	2.22203330199432	0.143429418211442	0.999140526205432	CDC42EP4
0.379610149892246	5.97822733697154	2.22179448282205	0.143450393317697	0.999140526205432	GPX7
-0.55284254004811	5.03008170335669	2.21907969985334	0.143689079067629	0.999140526205432	PRRC2C
-0.407411148296806	5.75432078341171	2.21852916341101	0.143737538906234	0.999140526205432	NSMCE1
0.373450618531352	6.02952034813915	2.21604316380706	0.143956600563963	0.999140526205432	PLEKHM2
-0.472821997254052	5.36831328490136	2.21410171835947	0.144127946982756	0.999140526205432	ING4
-0.703336170143438	4.34063409630324	2.21395836960211	0.144140607928728	0.999140526205432	USP9Y
0.57335570700937	4.83040677689492	2.21373743048055	0.144160124395243	0.999140526205432	FAM107B
-0.389483460480847	5.92430379172381	2.211696755428	0.144340530949126	0.999140526205432	MRPL2
-0.625976687125074	4.54260130872281	2.20595504779454	0.14484953842893	0.999140526205432	NAT9
0.369646231274074	6.13429593600714	2.20385941086003	0.145035838225763	0.999140526205432	SCYL1
0.45691637045841	5.4492438703822	2.20178223086666	0.145220772289891	0.999140526205432	FAM114A1
0.852623744902204	4.07514826835284	2.20144147575662	0.145251136346628	0.999140526205432	LPIN1
0.773555671499658	4.23304119196552	2.19737817975052	0.145613778844724	0.999140526205432	ZNF776
0.391783520979972	5.87698963675902	2.1925316726562	0.146047700113007	0.999140526205432	GPC6
0.33419141069804	6.35267520527236	2.18920805439647	0.146346142843766	0.999140526205432	BUD23
-0.330817637247389	6.50992478306427	2.18778753000111	0.146473914666672	0.999140526205432	HIF1A
0.442086766376635	5.52941744020366	2.18517108192592	0.146709596233193	0.999140526205432	.2209
-0.723011099881915	4.28588865697144	2.18253545507977	0.146947451903425	0.999140526205432	C17orf80
0.619166225058302	4.6260305767781	2.18096081334566	0.147089771843711	0.999140526205432	SFRP2
-0.596824972882705	4.63928240677802	2.17257796453464	0.147850142096851	0.999140526205432	RWDD2A
0.60281675398657	4.68813015931997	2.17248798799798	0.147858328266595	0.999140526205432	NCBP3
-0.45234309341355	5.4154101249332	2.17004576897964	0.14808072605349	0.999140526205432	SSH2
-0.393298089917904	5.91699884982876	2.16926959465413	0.14815148907142	0.999140526205432	GNPAT
0.526049832741207	5.04297342881897	2.16720186910122	0.148340193926152	0.999140526205432	MRPS30
-0.307386104250916	6.61429150223045	2.16211564786225	0.148805566377744	0.999140526205432	NIPSNAP1
-0.393123718034458	5.83682942805431	2.16186643692892	0.148828412064288	0.999140526205432	PTPN11
0.632089039033896	4.51724863822749	2.1552885330558	0.149432903671153	0.999140526205432	AC004475.1
-0.655352240369046	4.51178861106465	2.15525718958542	0.149435790898945	0.999140526205432	LSM12
-0.427058898005215	5.55717545025215	2.15364553094436	0.149584337809002	0.999140526205432	MRPS5
0.440014544680504	5.60054964932085	2.15302119961702	0.14964192884342	0.999140526205432	SOCS2
0.540720670838267	5.053914582279	2.1529631995715	0.149647280332714	0.999140526205432	TRIM37
0.363772700069308	6.18755896211014	2.1527086891	0.149670765886127	0.999140526205432	AIMP2
0.644619569425503	4.51723316101818	2.15051823699197	0.149873072889805	0.999140526205432	FAM160B1
0.474562167090999	5.47987487080114	2.15057457626875	0.14989014255791	0.999140526205432	PITHD1
0.404559818722863	5.73156691401666	2.15007904182654	0.149913674714324	0.999140526205432	CKMT2
0.466497357592175	5.54026027356831	2.14963987717519	0.150127623000241	0.999140526205432	FBXO22
0.510476694006559	5.12242794516498	2.14632516719394	0.150261229520203	0.999140526205432	COQ5
-0.619879180858353	4.65177288983494	2.14127612086459	0.150730182882467	0.999140526205432	ZNF302
-0.521726353186639	5.03405234783064	2.1388364003708	0.150957395298491	0.999140526205432	POGK
-0.739694073675471	4.30625439465556	2.13880276477887	0.15096053059202	0.999140526205432	ZNHIT2
-0.574317722387675	4.72314732801047	2.13833382505804	0.151004250057574	0.999140526205432	RAB35
-0.415276975141787	5.6878127790362	2.1355908447384	0.151260275768235	0.999140526205432	PTPMT1
-0.303789453016837	6.77525109232716	2.13550162028538	0.151268612355973	0.999140526205432	CUEDC2
-0.361254886811915	6.16557583104663	2.1352028951084	0.151296527317568	0.999140526205432	FGD5-AS1
-0.604747329829139	4.59315463673916	2.13423089721039	0.151387399221351	0.999140526205432	TTC7B
0.261027511143375	7.27062336778336	2.13291793267046	0.151510249273152	0.999140526205432	STUB1
-0.592490438783591	4.67373199965467	2.12765515016994	0.152003842082894	0.999140526205432	MARCH9
-0.410592592152089	5.70469566921552	2.12738008520546	0.152029691863511	0.999140526205432	KDELR3
-0.616804177790269	4.5841975302304	2.12569086941931	0.152188551990134	0.999140526205432	CAMSAP1
0.522970262126368	5.08242168192692	2.12374090259087	0.152372175403618	0.999140526205432	DDX3Y
0.393244750570853	5.93637019807558	2.12145262785007	0.152587986756993	0.999140526205432	SRA1
-0.560888716066412	4.80524626680835	2.11747573701047	0.152963905333015	0.999140526205432	TFPT
0.250428956855552	7.52174786019998	2.11724540002104	0.152985711262684	0.999140526205432	CTSD
0.72380284355474	4.2836598473361	2.1161528006261	0.153089196829348	0.999140526205432	SNX11
0.246453464915664	7.62079580310477	2.11604710209885	0.153099212408669	0.999140526205432	TOMM20
0.370472545327651	6.13529850327288	2.11048117587614	0.153627702155856	0.999140526205432	DLST
0.27096475362246	7.17782513270798	2.11038392670463	0.153636955002999	0.999140526205432	RAD23B
-0.565849633006644	4.76694264774027	2.11028619764798	0.153646254165963	0.999140526205432	DNAJC1
0.295928114734358	6.71162521686121	2.10662606916098	0.153994999120188	0.999140526205432	ACOT13
0.56452329030149	4.94175428751523	2.1056991954424	0.154083460566475	0.999140526205432	FOXM1
-0.586433894481804	4.67371639825648	2.10346005376549	0.154297411210779	0.999140526205432	WDTC1
-0.407568477152973	5.67637020400838	2.10049592142577	0.154581169946095	0.999140526205432	DNAJB9
-0.298580434393871	6.68975965684769	2.09938415779453	0.154687757447925	0.999140526205432	CGNL1
0.547718780120791	4.91925722628732	2.09679400166468	0.154936415972539	0.999140526205432	HEXIM1
0.241864553419105	8.01403150120248	2.09492092692726	0.155116525319655	0.999140526205432	HMGN1
-0.58045654435416	4.67665149288144	2.09448567736556	0.155158412732503	0.999140526205432	NSD1
0.314960510730378	6.79914617504333	2.10295777905543	0.155307293423868	0.999140526205432	AP2B1
0.694338511685381	4.33379411982185	2.09221876214586	0.155376789700419	0.999140526205432	PEX10
-0.645303693979339	4.48896434009326	2.09098019988817	0.155496255208102	0.999140526205432	UBXN2A
-0.209878330260693	8.83387198234147	2.09025454658955	0.155566298070915	0.999140526205432	PAM
-0.722935214382449	4.28277012705628	2.08888776654942	0.155698325354987	0.999140526205432	UTRN
0.550486538595462	4.86675501917866	2.08740088417427	0.155842103303035	0.999140526205432	PIP4P1
0.442266523392296	5.4827566042078	2.08654482050104	0.155924953159393	0.999140526205432	SPHKAP
-0.280781930929135	7.07828011250095	2.08567437756461	0.156009247560014	0.999140526205432	EFEMP1
-0.563610856128803	4.79801829787079	2.08551832115264	0.156024365833657	0.999140526205432	RPL31P49
0.762616108305112	4.28368256143297	2.08774750407576	0.156129849066499	0.999140526205432	IFFO1
0.562102678534253	4.8275882562771	2.0828169277091	0.156286340938241	0.999140526205432	ARMC1
0.461610680418533	5.37411033883795	2.08116353697547	0.156446937390665	0.999140526205432	AGFG1
0.717654980642696	4.34618808044903	2.08063571173435	0.156498246613499	0.999140526205432	ENDOV
0.795394836604956	4.13661745450166	2.07909838812778	0.156647800317872	0.999140526205432	MTND2P28
-0.325792935714365	6.50039402061017	2.07738609990705	0.156814572169308	0.999140526205432	POMGNT1
-0.377344371748415	5.89958559055631	2.07512095713484	0.157035510364336	0.999140526205432	SDF2
0.783987255896691	4.14455037844357	2.07214057798489	0.15732676783107	0.999140526205432	HNRNPA1P35
0.420871971222285	5.62095886814077	2.06919442422285	0.157615303490952	0.999140526205432	CKAP5
0.257246897261818	7.35723340075677	2.06833171188579	0.157699911881776	0.999140526205432	EIF3D
0.497265892663974	5.14799578938884	2.06826231475561	0.15770672014962	0.999140526205432	CASC4
0.435685883300811	5.54303666637921	2.06717401277578	0.157813534111342	0.999140526205432	WRNIP1
-0.391672546116306	5.80131747067464	2.06675154508676	0.157855021064474	0.999140526205432	UBE2J1
0.521613981700688	5.04988985912	2.06587620738356	0.157941021253332	0.999140526205432	EXOSC7
-0.410329486592706	5.64141791656027	2.06545435713611	0.157982486830773	0.999140526205432	AKAP13
-0.61365122562289	4.54559882236258	2.06446411239601	0.158079872679402	0.999140526205432	RARB
0.223006379063959	8.31321667705924	2.0639597385272	0.158129502520247	0.999140526205432	ANAPC11
-0.672838434149254	4.39032006439496	2.06365508933738	0.158159488526774	0.999140526205432	PPP1R13L
-0.497300663340841	5.15379717717286	2.06251423967939	0.158271839359542	0.999140526205432	GUCD1
-0.29043736814668	6.79378623750927	2.05645156820338	0.158870464949841	0.999140526205432	SREBF2
-0.352687586686053	6.22097668533026	2.05534360383115	0.158980151923337	0.999140526205432	AMOTL2
0.683785791478546	4.33843147441438	2.05406380726358	0.159106960741621	0.999140526205432	SAFB2
0.919057745219229	3.90722104703543	2.05380843996327	0.159132278057205	0.999140526205432	SIRT1
0.597987233611049	4.72379839839945	2.05297458542312	0.159214980003052	0.999140526205432	PATZ1
-0.280230464452638	6.85256137119922	2.05190337631881	0.159321296926914	0.999140526205432	RBM3
0.530783848943995	4.96173758611768	2.0466499913062	0.159843901290251	0.999140526205432	GOLT1B
0.472559730547491	5.29194646252306	2.0464258455453	0.159866243963953	0.999140526205432	ST3GAL6
-0.506585550020411	5.27611570193341	2.05520605796225	0.159952326755278	0.999140526205432	ZC3H11A
0.52003573409287	4.99352159353659	2.04407337712956	0.160100957648646	0.999140526205432	SAP30L
0.52003573409287	4.99352159353659	2.04407337712956	0.160100957648646	0.999140526205432	NAV2
0.334550830056221	6.3564117665456	2.04259326877564	0.160248840563974	0.999140526205432	SRP68
0.648091111308941	4.68947415732987	2.05566817377416	0.160307791982921	0.999140526205432	PPIL2
-0.285095397051032	6.77163178008758	2.04074415564245	0.160433817669725	0.999140526205432	SNHG5
-0.508173942165451	5.07116661501761	2.04004351157815	0.160503972554891	0.999140526205432	MTFP1
-0.55681377225592	4.7654524313988	2.03901837326929	0.160606683753584	0.999140526205432	SEL1L3
0.309511883848358	6.60834153160013	2.03671139382387	0.160838108566445	0.999140526205432	RPS2P46
-0.525228980921157	5.27002244092712	2.0502143288883	0.160848310335578	0.999140526205432	AP5M1
-0.427062632132076	5.50601383537011	2.03642035330923	0.160867332155992	0.999140526205432	UACA
-0.225570346593264	8.0276869991456	2.03614453725048	0.160895032808268	0.999140526205432	PEBP1
0.509629894018947	5.14253819570164	2.03509188537926	0.161000803892717	0.999140526205432	AURKA
0.438993070962061	5.58070968897811	2.0340852834516	0.161102024327738	0.999140526205432	NUDT16
0.46705591243785	5.31696082834486	2.0316214220908	0.161350097677948	0.999140526205432	EID2
0.504810256546772	5.10348630589204	2.02460863538834	0.162058641746157	0.999140526205432	SERTAD1
-0.55290900476841	4.8873952615704	2.01810157143998	0.162719366185763	0.999140526205432	LIMCH1
-0.293787101523748	6.6459755383018	2.01578531910997	0.162955322301121	0.999140526205432	MRPL23
0.694943759699463	4.33070648634359	2.0152190516582	0.163013069106048	0.999140526205432	UGCG
0.461027082959134	5.32602479099587	2.01519451247388	0.163015572106872	0.999140526205432	RYR2
-0.429118951265542	5.52610969782651	2.01332793056866	0.163206096473826	0.999140526205432	COPZ2
0.534223919676258	4.90497034317695	2.01284375033697	0.163255560181242	0.999140526205432	MRPS9
0.494853647935943	5.11034548407353	2.01160023707046	0.163382678040581	0.999140526205432	TIMM21
-0.516321850202507	5.11883755297033	2.00898185127457	0.16365072328855	0.999140526205432	EDC4
0.215989030055763	8.32891932742468	2.00820676004201	0.163730169039647	0.999140526205432	CALU
-0.524361676326739	5.02338620018292	2.00493002173394	0.164066532521428	0.999140526205432	TRAPPC12
0.395310231781594	6.14349039483073	2.02618396411972	0.164533253558844	0.999140526205432	PSPH
-0.524681618855173	5.05476849359989	2.00032353411411	0.16454077527798	0.999140526205432	RNF44
-0.223206359750632	8.1533175526994	1.99911473051655	0.164665490368749	0.999140526205432	H1FX
-0.385318896020048	5.76844091811315	1.9972146917259	0.164861747111288	0.999140526205432	TMBIM4
-0.517194619951612	4.94850478098891	1.99671438887358	0.164913469705617	0.999140526205432	GMPPA
0.257628394418012	7.19320189992474	1.99616645665301	0.164970138298026	0.999140526205432	UBE2H
-0.46767818772397	5.25213126310048	1.99456160259777	0.165136248679925	0.999140526205432	TATDN1
0.576589957844757	4.7253152449199	1.99456102823382	0.165136308164747	0.999140526205432	RBBP6
-0.323406110691342	6.27789616974113	1.99354908619966	0.165241150633701	0.999140526205432	NPDC1
0.733028344320483	4.20336515892102	1.99139524239598	0.165464561530527	0.999140526205432	CHD1L
0.540582736321377	4.92492432643732	1.99080948333023	0.165525381931114	0.999140526205432	EPHX1
0.428981939938276	5.46379212031349	1.99079932351346	0.165526437075489	0.999140526205432	SAP30BP
-0.340217958133811	6.11939123675067	1.99012844539146	0.165596128459775	0.999140526205432	MCTS1
-0.514440658935558	4.95271915475569	1.98081593706105	0.166567104124046	0.999140526205432	PDLIM4
0.302441103722164	6.51672313012784	1.98031128084542	0.166619914114602	0.999140526205432	GTF3C6
0.303641338383208	6.53222382560859	1.97995763263925	0.166656933577713	0.999140526205432	HDAC5
-0.507321769176485	5.02607353131561	1.97885743016266	0.16677216353387	0.999140526205432	NELFCD
0.205198555589736	8.64454229196724	1.97880845648991	0.166777294988679	0.999140526205432	ITM2B
-0.520021775928119	4.91403272029881	1.97577916653057	0.167095066261697	0.999140526205432	BTBD10
0.571583486940007	4.67387495302976	1.97321081192714	0.167365045746694	0.999140526205432	TWSG1
-0.311721366541003	6.47618243063433	1.97284245234719	0.167403809077658	0.999140526205432	RIC8A
-0.519826838985273	5.05954078093924	1.97194906524682	0.1674978663217	0.999140526205432	DPYSL2
-0.473648538563064	5.18158715256755	1.97071944135496	0.167627425218651	0.999140526205432	AL159166.1
0.234210297711607	7.69256703405416	1.96758523660837	0.16795819541072	0.999140526205432	ALDOC
-0.344622703949582	6.07656346680508	1.96579721667247	0.168147240607943	0.999140526205432	ATXN7L3B
0.291386638707402	6.65822865901362	1.96478290501465	0.168254594328524	0.999140526205432	STARD3NL
0.476794012625702	5.18373661824545	1.96423782101453	0.168312318926268	0.999140526205432	HSPA13
0.591641319857927	4.56108938535654	1.96360456750901	0.168379410099084	0.999140526205432	INTS14
-0.378125469899973	5.81846039569615	1.9627838408985	0.168466410477861	0.999140526205432	TBC1D7
-0.418499442471697	5.54349097829461	1.96239870090972	0.16850725520782	0.999140526205432	PROS1
-0.534319642243598	4.90701599051338	1.96083985582388	0.168672692905461	0.999140526205432	HACD2
-0.624009803106615	4.42714972586848	1.96061871464751	0.168696177806496	0.999140526205432	PHETA1
0.467464233118097	5.2450483111064	1.9591934553951	0.168847631231618	0.999140526205432	HMGB1P5
0.753267182441621	4.20023092711783	1.95835952397361	0.168936322474893	0.999140526205432	BID
0.595655674034477	4.55659069792319	1.95703668946638	0.169077123119024	0.999140526205432	DNAAF2
-0.459447209190029	5.40057105094937	1.95358530116681	0.169445137874469	0.999140526205432	ZNF581
-0.232550614748662	7.9154018191628	1.95326849609789	0.169478965621611	0.999140526205432	CNBP
0.629763371975762	4.44672321841398	1.95261707979338	0.169548547520411	0.999140526205432	PSMA3-AS1
0.377309115337702	5.79316219014301	1.94971099003003	0.169859377310931	0.999140526205432	TRAK1
-0.556489166347954	4.75380253432815	1.94965413226466	0.16986546542887	0.999140526205432	CCDC85C
0.336043233544633	6.14822087768293	1.94841550947288	0.169998156642287	0.999140526205432	ZFYVE21
0.325209124839353	6.24623276493062	1.94676042785408	0.170175653746426	0.999140526205432	USP5
0.732419863791385	4.20652723500106	1.93952486693532	0.170954202247171	0.999140526205432	AC079250.1
0.377971846109809	5.82843221676808	1.93681977904282	0.171246352927199	0.999140526205432	MAP1LC3A
-0.48432777410094	5.08783324105067	1.93656008648489	0.171274430928767	0.999140526205432	PHF20L1
0.203208604996939	8.70652321022913	1.93588684046749	0.171347247790284	0.999140526205432	POLR2L
-0.663727978000713	4.32013596601817	1.93416418322726	0.171533733742482	0.999140526205432	FNBP1L
-0.350863323896798	5.98353570200913	1.93278825083191	0.171682857769028	0.999140526205432	CCDC28B
-0.360413889835742	5.99546673035701	1.93183929478975	0.171785795437989	0.999140526205432	DERL1
0.538088605423952	4.81078892205792	1.93013088244748	0.171971299234618	0.999140526205432	DNAL4
-0.589707882259205	4.52091764463727	1.92923986151498	0.17206814274366	0.999140526205432	CSRNP2
-0.641329506444552	4.37073673310686	1.92465875078267	0.172567077198683	0.999140526205432	OSR1
-0.456823291839517	5.24081777711303	1.92458538555471	0.172575081436049	0.999140526205432	MAP2K4
0.694351657715651	4.25666674217408	1.92448376492269	0.172586169100011	0.999140526205432	CEBPZ
0.497801136740283	5.29293607787792	1.93248504958802	0.172663704662108	0.999140526205432	VAPB
0.495803733613585	5.07711611852608	1.92326143736193	0.172719601485363	0.999140526205432	TIMM10B
0.34097215237673	6.12970333394784	1.92297983617969	0.172750359116813	0.999140526205432	HEXA
0.618281593142582	4.44062324571928	1.92224077106464	0.172831113717485	0.999140526205432	CTNNBL1
0.205009567523821	8.57548250800619	1.92141372762984	0.172921534416983	0.999140526205432	HNRNPA2B1
0.621739351794375	4.43909658639219	1.92074336470153	0.172994866387194	0.999140526205432	C3orf52
0.621739351794375	4.43909658639219	1.92074336470153	0.172994866387194	0.999140526205432	APPL1
0.319852847127419	6.30502659686275	1.92035519317273	0.173037345889619	0.999140526205432	RAB18
-0.493030023011175	5.09476781018024	1.92003528427007	0.173072364377559	0.999140526205432	MPDZ
0.550254479188952	4.77008257031081	1.92003291472542	0.173072623788595	0.999140526205432	NUP98
0.380917406897938	5.79544112832878	1.91918410445422	0.173165578804645	0.999140526205432	MARCH5
0.613912238036642	4.64392828736127	1.9233584365319	0.173269510784778	0.999140526205432	XPO6
0.316660688962454	6.39987048912255	1.91799714385332	0.173295664683071	0.999140526205432	ATP6V1D
0.420682844949814	5.56886031360653	1.91774522678243	0.173323288638941	0.999140526205432	MPPED2
0.237537145324522	7.75146912373105	1.91563545255608	0.173554840982673	0.999140526205432	LSM4
0.389689157864808	5.78148408036427	1.91368097702496	0.173769676439624	0.999140526205432	ZMYND11
-0.701171011310285	4.20957574170026	1.91315412288378	0.173827642087907	0.999140526205432	BCL11A
-0.657542774549691	4.32638318451223	1.91202532172854	0.173951912516093	0.999140526205432	C2orf49
0.43380355193718	5.45455993233757	1.91141620939883	0.17401901386173	0.999140526205432	SAR1B
0.577776257687707	4.60645012951236	1.91104480894895	0.174059943342106	0.999140526205432	BEX2
-0.510250204391477	5.02844709899066	1.90827079212492	0.174366010175146	0.999140526205432	UTP6
0.496911659501302	5.06170229411132	1.90721165092511	0.174483037337519	0.999140526205432	ANAPC7
0.840791902252526	3.97952837023429	1.90651154641129	0.174560444818993	0.999140526205432	KIZ
-0.681624400564496	4.27067441927464	1.9061382061212	0.174601740080055	0.999140526205432	C2orf74
0.278423463732835	6.98987317989201	1.9061194779636	0.174603811911599	0.999140526205432	PARP1
0.437867738088796	5.45955143916547	1.90571604660332	0.174648449219185	0.999140526205432	PCYOX1
0.643509164874692	4.39583172774752	1.90556452105458	0.174665218129527	0.999140526205432	SLC5A6
-0.445869362021151	5.35254200958747	1.90334160017512	0.174911442437918	0.999140526205432	SEMA4C
-0.677008147515302	4.72792345690803	1.96232305068785	0.175012911853322	0.999140526205432	TACC3
-0.476273444696904	5.2777275778262	1.90150143662673	0.175115582040842	0.999140526205432	COMMD10
-0.647739506515701	4.32170066323455	1.89911901906006	0.175380297340001	0.999140526205432	PIEZO1
-0.726404669433229	4.1476178525408	1.89576356113625	0.175753935731365	0.999140526205432	ZNF512B
-0.381721273291073	5.70624336247913	1.89532683391192	0.175802635886762	0.999140526205432	AC026403.1
-0.569802242493621	4.56921363698031	1.89417011110677	0.175931701398089	0.999140526205432	DSC2
0.298501689347015	6.54679546297003	1.89376086958742	0.175977390953807	0.999140526205432	SPEG
-0.490964522962844	5.04554294402454	1.89308395326349	0.176052995875666	0.999140526205432	DHX40
-0.631737195376849	4.369190550917	1.8904202805586	0.176350877070388	0.999140526205432	NUP153
0.732677354135937	4.34854391032993	1.90594997554306	0.176357332885686	0.999140526205432	ST5
0.637904329872881	4.50367958365027	1.89148657324821	0.176547123219883	0.999140526205432	C12orf49
0.30421291066064	6.44618674398373	1.88819758119957	0.17659990235757	0.999140526205432	NUDT5
-0.248543801084078	7.29598606588736	1.88787677369744	0.176635879281821	0.999140526205432	RBMX
0.384170465951572	5.69270700539027	1.88635891981143	0.17680621703515	0.999140526205432	DNPH1
-0.256461102828088	7.11512257435008	1.88558204373586	0.176893475770705	0.999140526205432	TGFB1I1
0.342883606751448	6.03424683846355	1.8840068877818	0.177070554533683	0.999140526205432	MOAP1
-0.403897481314619	6.43001402956795	1.97642275928195	0.177144150247309	0.999140526205432	NDRG2
0.42294291392179	5.51357952052989	1.88331444967849	0.177148465002647	0.999140526205432	HSD17B12
0.568819681885556	4.60497994064596	1.88276601369014	0.177210201841314	0.999140526205432	GABBR1
0.253380001375862	7.25672735511508	1.88256740534035	0.177232565276588	0.999140526205432	TXNIP
0.579403875355661	4.6138982347791	1.8816242785783	0.177338807817392	0.999140526205432	C20orf27
-0.611152094789018	4.42099946780026	1.88116297917012	0.177390800444173	0.999140526205432	USP16
0.529893329162185	4.85185542230047	1.87931484076696	0.177599284326557	0.999140526205432	ZNF704
-0.284552897624517	6.6465013960541	1.87915777149223	0.177617016354679	0.999140526205432	P3H4
-0.438980164275399	5.41320921495701	1.87893059594737	0.177642666619083	0.999140526205432	POLR2M
0.391536990672446	5.71350291611476	1.87829483898467	0.177714473010717	0.999140526205432	STX7
-0.678440177474299	4.27225202983211	1.87827334039914	0.177716901799783	0.999140526205432	AC093673.1
-0.647840547176545	4.32482303576527	1.87668135791129	0.177896864805619	0.999140526205432	SNHG15
0.735430742712852	4.19076088034817	1.87448417029185	0.178145598517025	0.999140526205432	ATP8B2
-0.726289979620682	4.14443032054637	1.87416581925293	0.178181671921148	0.999140526205432	KIAA1109
-0.396387192283757	5.77586858230996	1.87582428855188	0.178308827979391	0.999140526205432	PACSIN2
-0.462320376436806	5.17342321582576	1.87185816929737	0.178443419415618	0.999140526205432	MED25
-0.470442001540215	5.16944931124954	1.87120937090859	0.178517092429167	0.999140526205432	ATAD3A
0.53730650823395	4.85970965407921	1.86931496487003	0.178732415261908	0.999140526205432	TIMM44
0.525923253358614	5.26208049155364	1.89446988097563	0.178944486618172	0.999140526205432	CNOT2
0.53929731697083	4.80504335138852	1.86557019652657	0.179158965330829	0.999140526205432	LRRC39
0.26107801812838	7.1292321096632	1.86487975974893	0.179237742245974	0.999140526205432	SEC61A1
0.573216503014271	4.61391085778646	1.86388805074994	0.179350965682851	0.999140526205432	PRPF4
0.42788562330237	5.39908102469952	1.86377971833853	0.179363339157138	0.999140526205432	FAM129A
0.788452984425095	4.04696732379717	1.86306664342757	0.179444810282741	0.999140526205432	WDR76
-0.751282650298024	4.0878476530675	1.86249419723354	0.179510246020962	0.999140526205432	TTC28-AS1
0.292873017373215	6.63835268711495	1.85980566787041	0.179817949598949	0.999140526205432	SCOC
-0.503084407970857	4.97648442629875	1.85873366867368	0.179940815682946	0.999140526205432	CLCN3
0.212684915447641	8.08175983115203	1.85349385074227	0.180542813702009	0.999140526205432	COL6A2
-0.785841825160793	4.01877587660075	1.85348384882137	0.180543965107361	0.999140526205432	COX6A1P2
0.441288383949273	5.31198107184709	1.85342073555525	0.180551230808876	0.999140526205432	DAXX
0.331765919268853	6.10992063281109	1.85296089199686	0.180604179268683	0.999140526205432	LSM2
-0.357753765715984	5.86112115776983	1.85275539793845	0.180627846765424	0.999140526205432	STT3A
0.64866919514621	4.40199750408269	1.8523115506069	0.18067897889407	0.999140526205432	C11orf54
0.329571146800241	6.27906381406076	1.85048868085459	0.180889158325438	0.999140526205432	RPS19BP1
0.445453628934764	5.27101781888626	1.84859686213461	0.181107596049405	0.999140526205432	GLYR1
-0.341796939243097	6.13735504985084	1.84797366852149	0.181179621603471	0.999140526205432	AIP
-0.24822339457649	7.18219059462661	1.84551232036909	0.181464425886367	0.999140526205432	ESD
0.424016587765166	5.42206851688256	1.84517219682759	0.181503823799452	0.999140526205432	SPATA20
-0.544623002285033	4.75667095198638	1.8451458122605	0.181506880459196	0.999140526205432	FZR1
-0.605031249050545	4.42713992805641	1.84316332114919	0.181736728404959	0.999140526205432	DPY19L1
-0.538721174695516	4.7441481236223	1.84314831920767	0.181738469037831	0.999140526205432	KCNK6
0.698464160159143	4.251978483361	1.84067957102989	0.18202518211165	0.999140526205432	CDC45
0.215852168173431	8.29223727996153	1.83977003072148	0.182130949469885	0.999140526205432	GAS5
0.784815420298596	4.04856932930698	1.83901711574492	0.182218558895017	0.999140526205432	INTS9
-0.688125598154031	4.20959054968691	1.83875256926779	0.182249353548234	0.999140526205432	PLCB4
0.652362766862366	4.31402497773759	1.83719781632134	0.18243046086507	0.999140526205432	TPMT
0.529510352434648	4.86826728671337	1.83719132379406	0.182431217605465	0.999140526205432	POP4
0.436310403525946	5.36923185106799	1.83542701490238	0.182636996633496	0.999140526205432	KDM3A
0.376908457748517	5.71603115007381	1.833658499405	0.182843544490727	0.999140526205432	WDR33
0.565570456864369	4.70568939313397	1.83260386842052	0.182966849361176	0.999140526205432	FBRSL1
0.311274672595929	6.31790362628985	1.83162860522325	0.183080963132416	0.999140526205432	HABP4
-0.516033219708867	5.01136538498851	1.83135939094749	0.183112478374206	0.999140526205432	MAPKAPK5-AS1
0.386891542042282	5.68034602673336	1.83011169689289	0.183258622794479	0.999140526205432	PJA1
0.487319431626549	5.05353296881045	1.82889373074125	0.183401419546029	0.999140526205432	USP19
0.321919810385336	6.34004056999334	1.82692375579675	0.183632664775076	0.999140526205432	POLR2F
-0.716701834905485	4.15242294934483	1.82100171177436	0.184329924090267	0.999140526205432	MAML1
-0.775887330195179	4.02041982799099	1.81722454354774	0.184776299693875	0.999140526205432	CCDC51
-0.515688507469299	4.99183361425856	1.81703703302865	0.184798492838825	0.999140526205432	ARHGAP10
0.645913140619636	4.31402266370634	1.81605061288283	0.184915294878	0.999140526205432	UNC119B
-0.814432757546338	3.95144941010524	1.81604632550062	0.18491580273973	0.999140526205432	EHBP1
0.352329796791877	5.93261745581059	1.8158648455382	0.184937301473041	0.999140526205432	ADAMTS12
0.237024969519234	7.63408756888517	1.81494827789854	0.18504592687856	0.999140526205432	ALKBH7
0.502884168468642	4.93672600922355	1.81310828486468	0.185264220890176	0.999140526205432	CFAP36
0.460330137821784	5.26261752790126	1.81268414979942	0.185314583317284	0.999140526205432	GRK6
0.40676003185727	5.60978491465963	1.81246660099902	0.185340421739529	0.999140526205432	HNRNPLL
0.376881774087613	5.7487507838223	1.81245233957996	0.185342115728711	0.999140526205432	PABPN1
0.542295382493592	4.84894898070063	1.81088447613232	0.185528461520265	0.999140526205432	GAR1
0.646502091474088	4.31091440676316	1.81081009111864	0.185537307995268	0.999140526205432	CMTM4
-0.215648541917535	7.98156296660795	1.81078891423556	0.18553982661593	0.999140526205432	SARAF
-0.445645769127612	5.23274882496081	1.8099058186346	0.185644891858449	0.999140526205432	SPTLC1
-0.445645769127612	5.23274882496081	1.8099058186346	0.185644891858449	0.999140526205432	EIF2B4
-0.61414496108989	4.4164031327798	1.8084859595872	0.185813967184393	0.999140526205432	UCHL5
0.226660840284073	7.6051143584858	1.8074057205427	0.18594272436088	0.999140526205432	GPC1
-0.551585580126064	4.66743631086474	1.8067922398094	0.186015894650648	0.999140526205432	ZC3HC1
0.373166017986318	5.71137134718985	1.80450929486111	0.186288486083762	0.999140526205432	BMPR2
0.290549920406074	6.88614325111241	1.80895405928902	0.186940572759768	0.999140526205432	ADSL
0.342830531079878	6.01720891714631	1.79722731369707	0.187161181236742	0.999140526205432	RPL10AP6
0.588938054283431	4.4868174972169	1.79581570388522	0.187330919067345	0.999140526205432	E2F6
0.337004228265889	6.23672246992065	1.79944434097869	0.187451405095137	0.999140526205432	CSNK1E
-0.530902279597436	4.69822710578971	1.79434842171208	0.1875075466976	0.999140526205432	HEMK1
-0.38079360053193	5.71064754896065	1.792506954871	0.187729500172529	0.999140526205432	TEAD1
0.407207939402233	5.48716934462612	1.79216045489121	0.187771299281314	0.999140526205432	SCFD1
0.45825633938922	5.16422911152678	1.79173531730247	0.187822599869627	0.999140526205432	DNASE1L1
-0.30533119398817	6.28814822157582	1.79170158856159	0.187826670575302	0.999140526205432	EIF2AK1
-0.247333986951721	7.08031144025936	1.79119698430807	0.187887583648865	0.999140526205432	RNH1
-0.698182759573846	4.21751456338972	1.78868015490611	0.188191755390225	0.999140526205432	GPALPP1
-0.364690298179088	5.8079138149337	1.78653049322323	0.188452020568415	0.999140526205432	FMOD
0.446099531723515	5.28021196753147	1.78404714750151	0.188753223250373	0.999140526205432	TYK2
0.294008353904613	6.45967604161438	1.78309606990354	0.188868731442875	0.999140526205432	FBXL5
-0.562204274980931	4.67365401007667	1.78142165461229	0.189072294963314	0.999140526205432	TELO2
0.40540401585279	5.60546459472434	1.78121954506583	0.189096883804146	0.999140526205432	RELA
0.368327236937506	5.73553989719802	1.7774960086255	0.189550580015419	0.999140526205432	HYAL2
0.445457932317206	5.28039305564428	1.77746223363493	0.189554701320429	0.999140526205432	GOLGA2
0.458653014226568	5.24683590012794	1.77649506404647	0.189672763306809	0.999140526205432	CHRM2
0.521992252668603	4.95631865989808	1.77272545620428	0.190133760955291	0.999140526205432	FNTB
-0.280822462617664	6.63910948911604	1.77172395440175	0.190256463951941	0.999140526205432	RABL6
-0.34020416498239	6.08724274258499	1.77077047765405	0.19037337132599	0.999140526205432	.2759
0.790600788854254	4.12710537966231	1.77704876293865	0.190534997542543	0.999140526205432	TRAF3
0.408889906411475	5.46110953707275	1.76669197566263	0.190874418036393	0.999140526205432	NQO2
-1.44644986370526	13.2383975436025	3.54210124434538	0.191117276378455	0.999140526205432	MT-ND3
0.731193332265517	4.21286461792756	1.75998082361843	0.191727202257632	0.999140526205432	MYNN
-0.304508568023369	6.46197483632158	1.7591031829021	0.191810929409989	0.999140526205432	MYO1C
0.729924401032216	4.11138476445343	1.75886976693384	0.191839822042602	0.999140526205432	AGPAT4
0.510510750074123	4.89479674717227	1.75846976921234	0.191889346618635	0.999140526205432	PLA2G15
0.451399664610834	5.20621655198621	1.75704539255167	0.192065826609613	0.999140526205432	MAGOH
0.226766835318041	7.68664129116813	1.7568655524495	0.192088122634871	0.999140526205432	UBE2D3
0.338967292182473	6.00832203609377	1.75470493172402	0.192356233222788	0.999140526205432	MTATP6P1
0.235085635421329	7.33015348051017	1.75392337997246	0.192453326491764	0.999140526205432	STC2
-0.483028310450551	5.06346953724753	1.75391871613691	0.192453906063471	0.999140526205432	GPAT4
-0.38012405188853	5.66940657065853	1.75345910237429	0.19251103225453	0.999140526205432	PRPF31
0.380935666629844	5.61419864834761	1.75115785772457	0.192797364833699	0.999140526205432	NNAT
0.272919700376396	6.6894685429583	1.74707160032787	0.19330706144982	0.999140526205432	KIFAP3
-0.480143277809954	5.06206557004563	1.74303197308252	0.1938125364557	0.999140526205432	POLR3D
0.730040758752608	4.30087755578127	1.75599595070711	0.193812734740779	0.999140526205432	MAN2A2
-0.239342749509606	7.25703845299512	1.74085427782159	0.194085689608617	0.999140526205432	DCTN2
0.193090299968763	8.97338613019736	1.7404341408866	0.194138441644671	0.999140526205432	TGM2
-0.359272521481703	5.79510163166526	1.74039277078337	0.194143636973305	0.999140526205432	NMT1
-0.364476153690281	5.73910526498354	1.73979781648912	0.194218370875912	0.999140526205432	CLDND1
-0.226237064838451	7.62819482905025	1.73828683496899	0.194408325342439	0.999140526205432	SSR3
[truncated: 6,334 more rows]
