# Supplementary material
Source: HighWire-hosted journal article supplement (doi:10.1101/rna.079727.123)
Supplement: Supplementary_Table_7.xlsx [file Supplementary_Table_7.xlsx]

## Sheet: Supplementary_Table_7
gene	chromosome	enrich_as	enrich_ns	deplete_as	deplete_ns	reverse_enrich_as	reverse_enrich_ns
TSPAN6	X	30	46	31	30	39	52
TNMD	X	19	25	13	19	10	14
DPM1	20	17	23	12	17	19	37
SCYL3	1	2	9	4	5	13	6
C1orf112	1	0	1	2	6	2	0
FGR	1	0	0	0	0	0	0
CFH	1	0	0	0	0	1	9
FUCA2	6	24	23	27	18	26	26
GCLC	6	12	12	7	12	9	12
NFYA	6	8	2	6	4	7	4
STPG1	1	4	2	1	2	5	2
NIPAL3	1	10	8	5	13	12	20
LAS1L	X	8	14	7	5	6	10
ENPP4	6	12	8	13	12	11	14
SEMA3F	3	2	0	0	0	1	2
CFTR	7	0	0	0	0	0	0
ANKIB1	7	7	6	2	7	4	10
CYP51A1	7	31	47	30	34	31	35
KRIT1	7	6	12	3	14	11	13
RAD52	12	1	2	0	2	2	1
MYH16	7	0	0	0	0	0	0
BAD	11	104	120	70	74	122	114
LAP3	4	14	18	16	11	25	21
CD99	X	215	291	230	194	211	324
HS3ST1	4	0	0	0	0	0	1
AOC1	7	0	0	0	0	1	1
WNT16	7	0	0	0	0	0	0
HECW1	7	0	0	0	0	0	0
MAD1L1	7	7	4	7	9	28	11
LASP1	17	10	17	10	6	15	16
SNX11	17	8	4	9	3	14	10
TMEM176A	7	92	177	127	126	120	183
M6PR	12	29	55	38	42	47	69
KLHL13	X	18	39	31	25	31	58
CYP26B1	2	1	6	4	3	1	2
ICA1	7	52	24	19	15	48	25
DBNDD1	16	4	4	2	5	9	6
ALS2	2	28	27	15	14	36	37
CASP10	2	1	0	0	1	0	0
CFLAR	2	16	13	14	10	11	15
TFPI	2	0	1	1	1	1	6
NDUFAF7	2	4	7	6	4	8	7
RBM5	3	47	46	28	25	53	48
MTMR7	8	0	1	0	1	0	0
SLC7A2	8	6	8	3	5	11	15
ARF5	7	129	114	75	79	138	119
SARM1	17	3	0	3	3	4	2
POLDIP2	17	49	72	44	41	64	80
PLXND1	3	0	0	1	0	3	2
AK2	1	65	69	41	59	111	102
CD38	4	0	0	0	0	0	0
FKBP4	12	60	57	51	52	119	126
KDM1A	1	50	39	23	33	82	70
RBM6	3	6	11	6	2	15	15
CAMKK1	17	4	4	5	8	15	16
RECQL	12	11	11	2	6	10	7
VPS50	7	10	7	7	4	10	7
HSPB6	19	114	136	94	94	94	105
ARHGAP33	19	2	2	9	5	5	0
NDUFAB1	16	264	270	211	191	288	306
PDK4	7	1	1	1	1	3	4
SLC22A16	6	0	0	0	0	0	0
ZMYND10	3	3	2	0	1	0	1
ABCB5	7	0	0	0	0	0	0
ARX	X	0	0	0	0	0	0
SLC25A13	7	6	7	13	6	9	10
ST7	7	25	21	24	10	24	22
CDC27	17	17	15	19	9	23	16
SLC4A1	17	0	0	0	0	0	0
CALCR	7	0	0	0	0	0	0
HCCS	X	24	24	25	12	15	27
DVL2	17	31	18	16	13	38	34
PRSS22	16	0	0	0	0	0	0
UPF1	19	15	18	16	14	31	34
SKAP2	7	0	0	0	0	1	2
SLC25A5	X	291	296	216	216	450	469
MCUB	4	0	1	0	0	1	0
HOXA11	7	0	0	0	0	0	0
POLR2J	7	115	121	78	60	124	102
DHX33	17	5	6	0	4	4	7
MEOX1	17	0	0	0	0	0	0
THSD7A	7	2	4	2	1	4	1
LIG3	17	6	4	9	5	4	10
RPAP3	12	17	17	15	11	23	32
ACSM3	16	0	0	0	0	0	1
REXO5	16	18	14	10	13	14	12
CIAPIN1	16	39	37	28	28	43	56
SPPL2B	19	16	6	7	10	8	13
FAM214B	9	13	14	4	6	16	15
COPZ2	17	14	17	11	17	10	14
PRKAR2B	7	26	35	28	24	32	32
MSL3	X	13	10	5	4	3	1
CREBBP	16	12	13	9	6	23	28
TSPOAP1	17	6	2	6	2	9	4
MPO	17	0	0	0	0	0	0
PON1	7	0	0	0	0	0	0
GCFC2	2	16	16	7	12	12	14
WDR54	2	8	7	6	3	26	38
CROT	7	5	6	3	2	4	8
ABCB4	7	12	10	4	3	28	41
KMT2E	7	8	10	4	4	7	12
RHBDD2	7	39	35	27	24	43	45
SOX8	16	0	0	0	0	0	2
IBTK	6	19	11	11	13	27	28
ZNF195	11	5	5	9	3	6	12
MYCBP2	13	4	4	4	2	5	2
FBXL3	13	14	20	21	16	17	18
ITGAL	16	0	0	0	0	0	0
PDK2	17	76	74	44	57	101	94
ITGA3	17	16	31	16	13	23	26
ZFX	X	4	5	3	0	5	6
LAMP2	X	28	28	24	13	19	37
ITGA2B	17	1	0	0	0	0	0
ASB4	7	0	0	0	0	0	0
GDE1	16	59	90	56	46	73	68
REX1BD	19	34	26	29	26	50	41
CRLF1	19	0	0	0	0	0	0
AC003665.1	17	0	2	5	0	5	4
TMEM98	17	71	96	82	82	68	76
YBX2	17	2	2	1	2	8	7
KRT33A	17	0	0	0	0	0	0
MAP3K14	17	1	3	2	4	0	8
ABCC8	11	1	0	0	2	0	0
CACNG3	16	0	0	0	0	0	0
TMEM132A	11	10	11	2	4	19	14
AP2B1	17	61	71	42	43	88	110
TAC1	7	0	0	0	0	0	0
ZNF263	16	7	8	1	7	10	5
CX3CL1	16	2	0	0	1	3	1
SPATA20	17	11	15	10	6	31	45
CACNA1G	17	33	51	12	43	41	29
TNFRSF12A	16	284	262	184	160	162	162
DLX6	7	0	0	0	0	0	0
MAP3K9	14	2	3	1	1	2	0
RALA	7	24	26	24	16	20	33
BAIAP2L1	7	1	2	0	0	2	2
KDM7A	7	6	7	1	1	5	3
ETV1	7	55	77	51	60	88	92
AGK	7	17	14	12	8	18	25
ALDH3B1	11	1	1	2	0	2	2
TTC22	1	0	0	0	0	0	0
PHTF2	7	32	23	16	15	42	47
CCL26	7	0	0	0	0	2	0
FARP2	2	12	3	4	3	8	5
USH1C	11	14	26	11	17	30	29
GGCT	7	39	35	26	22	50	36
DBF4	7	3	9	6	3	6	7
TBXA2R	19	0	0	0	0	0	0
IFRD1	7	12	9	3	5	13	14
LGALS14	19	0	0	0	0	0	0
COX10	17	11	18	17	9	13	19
GTF2IRD1	7	8	7	6	5	13	27
PAF1	19	12	13	4	11	17	19
VPS41	7	8	22	11	13	12	18
ARHGAP44	17	4	4	4	4	6	4
ELAC2	17	23	21	12	9	47	33
SCIN	7	0	0	0	0	0	0
ARSD	X	11	7	4	6	18	15
PNPLA4	X	26	22	19	16	27	23
MYH13	17	0	0	0	0	0	0
ADIPOR2	12	43	42	27	22	40	44
CDKL3	5	6	2	5	1	2	1
UPP2	2	0	0	0	0	0	1
PRSS21	16	0	0	0	0	0	0
MARK4	19	22	24	21	16	24	25
PROM1	4	0	0	2	0	0	0
CCDC124	19	54	55	50	31	76	79
CEACAM21	19	0	0	0	0	0	0
PAFAH1B1	17	44	95	40	39	54	82
NOS2	17	0	0	0	0	0	1
DNAH9	17	0	0	0	0	0	0
KIAA0100	17	16	12	19	14	46	29
SLC13A2	17	0	0	0	0	0	0
GAS7	17	22	27	18	19	14	21
TRAPPC6A	19	18	18	9	17	31	44
MATK	19	0	0	0	0	0	0
CEACAM7	19	0	0	0	0	0	0
CD79B	17	0	0	0	0	0	0
SCN4A	17	0	0	0	0	0	0
ST7L	1	10	9	2	6	5	12
TKTL1	X	0	2	0	0	4	4
PAX6	11	3	2	1	1	0	0
RPUSD1	16	13	12	4	6	11	9
RHBDF1	16	4	11	5	3	8	13
LUC7L	16	13	7	4	9	10	8
CACNA2D2	3	3	3	0	3	3	3
BAIAP3	16	0	2	0	1	1	1
TSR3	16	62	79	47	44	83	79
PIGQ	16	9	11	12	11	18	17
CRAMP1	16	4	3	13	5	7	8
TEAD3	6	25	17	22	31	34	37
SELE	1	0	0	0	0	0	0
DNAJC11	1	26	24	18	18	32	29
FMO3	1	0	0	0	0	0	0
MYLIP	6	14	19	7	14	5	9
NOX1	X	0	0	0	0	0	0
E2F2	1	0	0	0	1	2	2
PSMB1	6	196	147	139	132	205	206
SYN1	X	9	12	4	6	17	15
JARID2	6	5	4	5	3	5	10
CDKL5	X	5	5	0	3	4	6
CAMK1G	1	1	3	2	4	1	2
CDK11A	1	8	9	10	11	12	9
NADK	1	15	20	7	8	11	12
TFAP2B	6	0	0	0	0	0	0
TFAP2D	6	0	0	0	0	0	0
DLEC1	3	0	0	0	0	0	0
CYTH3	7	13	15	6	11	19	15
ADAM22	7	2	3	2	1	2	2
SYPL1	7	77	74	61	49	73	81
CYB561	17	4	3	3	1	5	4
SPAG9	17	12	11	7	8	21	30
CELSR3	3	0	0	0	0	0	0
AASS	7	22	17	14	9	23	12
PLEKHG6	12	0	0	0	0	0	0
SS18L2	3	14	11	6	6	14	11
MPND	19	16	18	7	7	10	12
MGST1	12	6	3	7	6	7	6
CRY1	12	13	20	15	6	15	15
PGLYRP1	19	0	0	0	0	0	0
NFIX	19	4	1	5	0	7	10
ST3GAL1	8	25	17	13	17	20	18
MMP25	16	0	0	0	0	0	0
IL32	16	2	1	1	3	0	4
PKD1	16	17	10	7	7	12	14
MAPK8IP2	22	0	1	0	0	0	0
MED24	17	23	25	24	11	47	29
RHOBTB2	8	11	15	9	8	24	25
HEATR5B	2	17	16	15	5	14	19
SEC62	3	32	32	28	33	37	38
RPS20	8	2258	1859	1171	1419	2133	2645
CSDE1	1	332	292	213	219	279	310
UBE3C	7	16	22	11	20	25	23
REV3L	6	3	5	2	2	7	16
TENM1	X	1	0	0	0	1	0
PAX7	1	0	0	0	0	0	0
MASP2	1	0	0	0	0	0	0
IYD	6	0	0	0	0	0	0
FAM76A	1	4	3	7	5	5	8
TRAF3IP3	1	0	0	0	1	0	0
POMT2	14	13	11	7	10	9	15
VTA1	6	55	51	44	38	44	66
MLXIPL	7	0	0	0	0	0	0
BAZ1B	7	11	16	11	17	15	10
RANBP9	6	24	33	27	23	28	38
ETV7	6	0	0	0	0	0	0
SPRTN	1	5	7	4	4	5	6
EEF1AKNMT	1	5	17	6	5	20	9
DYRK4	12	14	33	25	20	24	42
ZNF207	17	56	46	44	28	57	68
UQCRC1	3	251	228	179	171	345	313
STARD3NL	7	25	45	22	36	38	64
CD9	12	2	5	0	1	8	8
HHATL	3	96	69	44	45	100	124
NCAPD2	12	12	14	16	12	9	13
IFFO1	12	11	11	7	5	12	6
GIPR	19	1	0	0	0	0	0
PHF7	3	0	1	0	0	3	0
SEMA3G	3	1	3	0	1	6	5
NISCH	3	29	46	19	27	51	52
STAB1	3	0	0	0	0	0	0
FUZ	19	14	16	15	13	16	10
SLC6A13	12	0	0	0	0	1	1
IDS	X	13	30	14	10	30	25
PRSS3	9	0	0	0	0	0	0
ZNF200	16	6	5	6	3	5	5
CD4	12	0	3	0	0	1	1
LRRC23	12	10	8	5	5	14	14
BTK	X	0	0	0	0	0	0
HFE	6	0	0	0	0	0	0
SCMH1	1	25	18	16	14	27	35
FYN	6	25	40	24	22	13	24
HIVEP2	6	4	3	8	2	10	10
FMO1	1	0	0	0	0	0	0
ELOA	1	19	26	10	10	27	18
LYPLA2	1	24	23	13	14	29	41
CLCN6	1	7	6	8	3	3	4
AC080038.1	17	3	2	1	2	19	13
NME1-NME2	17	1	2	1	0	0	7
SLC6A7	5	0	0	0	0	0	0
TSPAN9	12	179	155	76	106	230	225
BTBD7	14	8	9	8	19	12	15
APBA3	19	3	5	2	3	4	6
MKS1	17	3	8	1	1	5	11
ABHD5	3	8	12	11	8	4	15
ANOS1	X	11	13	6	10	13	11
AKAP8L	19	73	82	44	44	80	88
MBTD1	17	9	6	10	10	18	17
UTP18	17	7	8	3	5	17	7
RNF216	7	25	22	21	8	20	21
TTC19	17	21	27	16	10	50	46
PTBP1	19	26	18	17	15	48	29
DPF1	19	1	3	3	0	3	1
SYT7	11	1	2	1	1	0	2
LARS2	3	13	5	9	5	13	11
PIK3C2A	11	7	5	4	4	12	13
PLAUR	19	1	1	0	0	2	1
ANLN	7	26	33	26	24	22	42
WIZ	19	24	17	13	11	20	20
RABGAP1	9	22	22	20	22	32	25
DCN	12	0	3	2	2	34	50
QPCTL	19	0	1	1	1	1	0
PPP5C	19	49	58	35	27	43	50
CEP68	2	12	13	8	7	12	19
MAP4K3	2	12	25	15	14	17	20
ZBTB32	19	0	0	0	0	0	0
TYROBP	19	0	0	0	0	0	0
TMEM159	16	100	78	69	58	103	87
GABRA3	X	0	0	0	0	0	0
BRCA1	17	13	2	2	3	3	6
ERCC1	19	40	35	33	34	73	90
CD22	19	0	0	0	0	0	0
SEMA3B	3	3	10	7	7	8	3
MBTPS2	X	6	13	4	4	11	15
PRICKLE3	X	2	0	2	0	1	3
LTF	3	0	0	0	0	0	0
EXTL3	8	33	39	34	29	67	35
NR1H4	12	0	0	0	0	0	0
ELOVL5	6	14	28	28	27	22	24
ALOX5	10	0	0	0	0	0	0
KDM5D	Y	16	14	10	7	14	18
CALCOCO1	12	41	31	28	14	49	52
UBR7	14	25	20	16	18	28	36
MAP4K5	14	14	9	11	3	22	20
EHD3	2	68	92	70	77	99	143
PSMC4	19	43	61	48	39	58	55
MAN2B2	4	10	4	4	2	5	9
SLC7A14	3	0	1	0	0	0	0
CLDN11	3	0	1	0	0	0	0
SLC25A39	17	44	65	53	38	55	85
MVP	16	15	20	7	14	31	27
NUB1	7	25	22	10	13	31	30
PGM3	6	12	4	6	7	13	20
RWDD2A	6	8	7	8	7	8	14
CLK1	2	36	22	21	26	19	20
POLR3B	12	4	6	7	4	6	11
ANGEL1	14	4	3	6	3	7	12
RNF14	5	27	25	23	15	28	30
DNASE1L1	X	22	22	13	11	15	13
DDX11	12	5	21	7	2	9	4
HEBP1	12	56	58	36	31	59	70
GPRC5A	12	0	0	0	0	1	0
MAMLD1	X	0	1	0	1	0	0
CD6	11	0	0	0	0	0	0
TACC3	4	7	14	6	8	6	25
UFL1	6	7	14	5	5	18	19
POLA2	11	14	15	7	9	16	18
ZC3H3	8	12	12	3	8	10	8
CAPN1	11	71	71	52	49	65	51
ACPP	3	0	0	0	0	2	2
MDH1	2	1032	1168	820	814	902	1062
SLC30A9	4	35	33	27	24	44	40
MTMR11	1	1	0	0	0	3	2
COX15	10	11	13	11	9	17	21
CCDC88C	14	2	0	0	0	1	1
YAF2	12	54	37	36	37	32	28
ZMYND11	10	50	38	34	36	51	62
WAS	X	0	0	0	0	0	0
DPEP1	16	0	0	0	0	0	0
BID	22	7	3	6	3	3	3
MATR3	5	106	119	105	89	162	169
NPC1L1	7	0	0	0	0	0	0
XYLT2	17	11	9	4	7	16	11
RGPD5	2	6	6	5	3	4	7
STMN4	8	0	0	0	0	0	0
NUDCD3	7	34	24	16	20	52	46
ISL1	5	9	7	11	10	7	8
CHDH	3	3	0	2	0	5	6
IL20RA	6	0	0	0	0	1	3
CLCA1	1	0	0	0	0	0	0
CLCA4	1	0	0	0	0	0	0
GLT8D1	3	27	19	20	9	15	17
ATP2C1	3	17	28	26	20	35	53
IGF1	12	0	1	0	0	0	0
SLC38A5	X	0	0	0	0	0	0
RALBP1	18	9	23	15	11	14	24
RUFY3	4	14	9	3	1	8	12
CNTN1	12	15	16	19	10	26	13
SLC11A1	2	0	0	0	0	1	0
WWTR1	3	61	58	29	35	61	56
AGPS	2	18	28	13	26	23	27
ZNF806	2	0	0	0	0	0	0
CXorf56	X	5	5	2	2	5	7
ATP1A2	1	20	26	15	11	22	26
TTC27	2	16	22	12	17	20	36
ZNF582	19	9	4	7	1	4	4
VSIG2	11	0	0	0	0	0	0
PHLDB1	11	49	55	41	52	38	43
MARCO	2	0	0	0	0	0	0
CYP24A1	20	0	0	0	0	0	0
PRDM11	11	10	16	4	4	15	17
SYT13	11	19	15	9	10	32	22
SNAI2	8	1	1	1	0	2	4
CD74	5	0	0	0	0	0	1
HGF	7	0	0	0	0	1	6
ZRANB1	10	29	24	18	18	49	34
NCDN	1	9	21	9	17	21	37
ADGRA2	8	5	4	2	5	4	5
CCT8L1P	7	0	0	0	0	0	0
ZFP64	20	5	7	4	5	5	8
MNAT1	14	20	20	14	14	20	22
SAMD4A	14	28	38	27	21	34	26
RUNX3	1	0	0	0	0	0	0
MRE11	11	1	3	3	2	3	4
PLEKHB1	11	5	3	2	5	14	9
SERPINB1	6	4	2	3	3	17	9
CYP3A43	7	0	0	0	0	0	0
SLC7A9	19	0	0	0	0	0	0
SPAST	2	4	5	4	3	6	10
NRXN3	14	0	0	0	0	0	0
OSBPL5	11	7	4	3	0	8	7
AQR	15	6	5	4	9	5	11
CPS1	2	2	2	0	5	2	1
C8B	1	0	0	0	0	0	0
FHL1	X	465	517	350	340	231	217
RTF2	20	97	79	56	64	94	90
GABRA1	5	0	0	0	0	0	0
NLRP2	19	16	10	7	8	13	11
SLC45A4	8	4	3	4	2	5	7
RNF10	12	138	113	81	96	151	141
ZNF839	14	5	1	1	4	6	5
ZDHHC6	10	11	10	3	4	14	11
GRAMD1B	11	1	2	1	1	2	5
RNH1	11	78	77	57	67	117	84
NDUFS1	2	70	82	67	68	98	93
RB1CC1	8	10	19	17	11	28	25
ERP44	9	17	22	22	14	22	30
ALAS1	3	44	44	32	18	45	50
BIRC3	11	0	0	0	0	0	0
AKAP11	13	6	5	5	4	9	8
GLRX2	1	36	42	23	24	24	22
SNAPC1	14	8	14	8	8	13	7
DERA	12	13	13	11	10	4	14
STRAP	12	124	116	103	102	121	124
ABCC2	10	0	0	0	0	0	0
DEF6	6	2	0	0	0	0	0
PLEKHO1	1	60	56	48	44	79	100
GCLM	1	2	2	2	2	6	2
UBR2	6	7	6	4	2	7	5
EHD2	19	0	2	1	0	4	9
DEPDC1	1	11	13	9	7	10	14
CCDC28A	6	2	0	2	2	0	3
RRAGD	6	26	35	22	26	45	40
HSF2	6	24	25	21	17	34	27
PHF20	20	35	13	27	18	33	36
HSD17B6	12	1	0	0	0	0	0
NR1H3	11	0	0	4	0	11	7
TYMP	22	0	0	0	0	0	2
NCAPH2	22	37	41	25	29	50	28
TOMM34	20	14	12	12	8	18	19
SEC63	6	11	27	17	18	23	24
KPNA6	1	23	21	9	17	35	36
VIM	10	193	316	234	252	308	603
RTEL1-TNFRSF6B	20	3	0	0	1	0	1
FAS	10	0	0	0	0	0	3
RNASET2	6	2	5	4	3	12	11
CD44	11	2	4	1	2	0	2
KCNG1	20	0	1	0	0	1	2
AGPAT4	6	14	13	4	2	16	13
SLAMF7	1	0	0	0	0	0	0
BTN3A1	6	0	0	1	1	9	4
MIPEP	13	3	9	7	7	13	18
PRKCH	14	18	7	15	10	19	26
INSRR	1	0	1	0	0	0	0
IFNGR1	6	26	40	30	22	23	37
B4GALT7	5	18	18	8	8	16	20
SH2D2A	1	0	0	0	0	0	1
VRK2	2	6	19	7	9	1	8
TNFRSF1B	1	0	0	0	0	0	0
VEZT	12	16	41	22	17	25	44
POU2F2	19	0	0	0	0	0	0
BRD9	5	5	10	6	2	14	12
SNX1	15	35	36	18	29	22	42
TBPL1	6	7	15	7	9	11	7
ARNTL2	12	3	7	2	4	5	3
BCLAF1	6	32	20	16	23	51	47
SLC39A9	14	6	14	6	5	10	8
ANK1	8	1	2	1	0	1	2
IBSP	4	0	0	0	0	0	0
TFB1M	6	8	2	3	1	9	8
RABEP1	17	23	24	26	26	26	47
HMGB3	X	33	40	34	39	39	41
NUP160	11	15	16	9	8	11	21
BAK1	6	42	30	29	22	50	51
MUSK	9	0	0	0	0	0	0
IKZF2	2	1	1	1	2	1	4
GRN	17	94	97	55	60	110	105
FAM13B	5	18	12	5	9	12	15
ARHGAP31	3	50	97	50	55	59	74
CENPQ	6	5	10	9	7	7	9
SARS	1	59	67	45	39	90	63
RANBP3	19	40	41	24	17	39	54
ARID4A	14	3	4	3	2	3	5
EIPR1	2	4	8	5	1	10	13
PNPLA6	19	6	12	5	5	12	13
IFT88	13	8	6	1	3	9	9
ALG1	16	6	7	3	3	11	12
ZCCHC8	12	7	7	6	3	8	7
ABCF2	7	20	25	11	9	23	23
CHPF2	7	13	7	4	6	15	10
LRRC7	1	1	0	0	2	5	5
FUT8	14	5	5	3	6	11	8
UBA6	4	12	13	0	4	10	13
GAB2	11	4	10	3	7	12	9
ATP6V0A1	17	15	11	4	7	17	16
PIAS1	15	28	29	24	14	36	28
SLC4A7	3	18	2	2	2	6	7
APBA2	15	1	0	0	1	0	4
MAP2K3	17	18	9	8	7	16	12
EFCAB1	8	0	0	0	0	0	0
TMSB10	2	926	815	594	532	917	821
ASTE1	3	6	4	3	1	2	3
RNF19A	8	21	37	18	28	44	47
PEX3	6	9	13	11	11	13	13
GABARAPL2	16	177	223	143	144	184	235
MYOC	1	1	0	0	3	0	0
SH3YL1	2	3	3	1	3	2	14
FAM136A	2	23	39	22	22	38	34
VCL	10	146	165	130	103	127	95
DEPDC1B	5	0	3	2	3	3	5
DAPK2	15	12	8	4	2	20	17
NSMAF	8	12	10	4	6	15	14
ADSS	1	9	2	3	6	8	9
STAP1	4	0	0	0	0	0	0
TIMP2	17	65	98	65	66	77	61
RFC1	4	25	19	12	6	26	24
TBC1D23	3	10	10	4	4	11	14
CUL3	2	36	37	36	37	40	42
MYOM2	8	22	31	21	19	43	33
OTC	X	0	0	0	0	0	0
CYP46A1	14	10	6	4	1	8	8
AC118549.1	1	12	13	11	8	7	19
SLC18A1	8	0	0	0	0	0	0
USP2	11	24	23	20	22	28	21
CASR	3	0	0	0	0	0	0
TUBG2	17	7	7	5	6	16	20
RPL26L1	5	47	42	21	35	25	46
FLT4	5	0	0	0	0	0	0
NSUN2	5	14	13	9	21	10	17
FBXO42	1	14	12	9	12	27	21
MFAP3	5	3	11	9	11	12	15
MRI1	19	4	3	3	1	3	6
METTL1	12	5	1	5	0	3	2
HOXC8	12	0	0	0	0	0	0
AGA	4	5	3	1	1	2	3
PI4K2B	4	2	2	0	1	3	2
BOD1L1	4	9	3	3	5	12	9
MAT2B	5	49	56	31	23	43	65
TLL1	4	1	1	1	1	1	0
EDC4	16	18	17	13	15	26	21
TRIO	5	10	13	11	11	8	17
VCAN	5	10	14	17	7	52	69
CLEC16A	16	3	14	2	4	13	7
MSR1	8	0	0	0	0	0	0
CDH1	16	0	0	0	0	0	0
MTREX	5	15	27	20	20	30	25
DNAH5	5	0	0	0	0	0	0
ZFYVE16	5	10	17	10	6	16	21
RIPOR1	16	10	19	11	7	23	27
C6	5	0	0	2	1	2	1
RAI14	5	20	22	15	18	18	19
SOX30	5	0	0	0	0	0	0
PNKP	19	20	17	11	8	36	25
BEST2	19	0	0	0	0	0	0
PHLPP2	16	2	3	6	2	0	4
SPDL1	5	8	3	4	6	3	4
STAU2	8	54	47	40	40	44	60
PQLC2	1	6	11	5	1	8	4
CTNS	17	8	1	3	5	6	11
RTN4R	22	1	1	3	1	0	3
PHF23	17	51	45	30	28	45	38
CDH10	5	0	0	0	0	0	0
INPP4A	2	6	4	7	8	13	7
RAB27B	18	0	0	0	1	1	0
PSMA4	15	77	113	74	77	95	149
MYO16	13	0	0	0	0	0	0
LSG1	3	9	11	9	6	12	5
PARP3	3	0	2	4	5	4	3
TNC	9	0	0	0	0	0	2
THAP3	1	21	12	6	10	13	15
RIPOR3	20	0	0	0	0	0	0
TDP1	14	2	7	1	2	11	28
AIFM2	10	4	2	6	2	3	7
C2orf83	2	0	0	0	0	0	0
SPATA7	14	3	3	2	7	9	8
MED17	11	27	21	14	16	9	18
RETSAT	2	5	3	1	2	5	8
CAPG	2	2	0	0	1	0	5
AP2S1	19	151	129	92	97	141	136
USH2A	1	1	1	0	0	0	0
ZPBP	7	0	0	0	0	0	0
TG	8	0	4	0	0	1	1
ADAM28	8	0	0	0	0	0	0
BARX2	11	0	0	0	0	0	0
DCUN1D1	3	15	18	8	8	13	27
JADE2	5	6	7	2	2	4	7
ZIC2	13	0	0	0	0	0	0
LCP2	5	0	0	0	0	0	0
TRIT1	1	3	9	4	10	15	7
ADRB1	10	0	1	1	0	0	1
GUCA2B	1	0	0	0	0	0	0
CUL7	6	15	6	11	14	20	18
CTNNA1	5	175	211	176	156	234	247
PHKA2	X	8	6	4	4	14	10
CNTLN	9	4	1	1	3	6	7
EPHA3	3	2	0	1	1	6	6
HSPA5	9	316	329	226	242	439	426
DSG2	18	10	8	15	10	17	20
GEMIN8	X	11	10	11	4	7	6
OFD1	X	3	5	1	4	6	7
GPM6B	X	15	15	11	7	9	1
MAGEC2	X	0	0	0	0	0	0
PREX2	8	0	0	1	0	1	0
WDR37	10	8	9	9	4	9	12
YTHDC2	5	5	6	5	3	5	6
CTPS2	X	4	5	3	4	14	9
ATP6V1H	8	30	46	27	26	42	49
POLR2B	4	64	83	43	40	49	54
FAM214A	15	10	8	5	8	8	13
ARAP2	4	2	1	2	2	0	2
TPR	1	31	18	18	11	17	39
CP	3	0	0	0	0	0	0
KIAA0556	16	5	3	2	3	2	6
DTNBP1	6	25	23	10	7	21	29
XK	X	5	2	0	3	1	3
ANO2	12	0	0	0	0	0	0
C12orf4	12	3	8	2	4	1	14
SCML1	X	0	2	2	2	1	1
WWC3	X	2	10	5	4	8	5
ARHGAP6	X	5	4	4	7	7	5
FAM184B	4	0	0	0	0	0	0
MAP4	3	210	217	166	157	229	222
GOPC	6	23	14	16	15	23	22
ROS1	6	0	0	0	0	0	0
USP28	11	62	56	40	37	86	65
HDAC9	7	14	31	17	13	26	19
TSPAN17	5	21	28	22	13	27	20
NOP16	5	24	16	10	15	15	8
CC2D2A	4	11	4	8	5	5	12
RRM2B	8	10	11	4	8	4	12
ZNF800	7	4	7	5	2	4	10
TNFRSF17	16	0	0	0	0	0	0
SNX29	16	2	0	1	5	2	8
LMO3	12	2	2	2	1	6	3
MRPS10	6	32	35	22	19	41	32
GUCA1A	6	0	0	0	0	0	0
RSF1	11	19	9	5	11	14	15
VPS13D	1	189	130	123	110	239	231
CELF2	10	37	56	57	31	57	38
FAM120A	9	33	31	14	22	46	45
R3HDM1	2	6	7	1	2	11	5
COL9A2	1	0	0	0	0	0	0
KITLG	12	1	7	6	7	2	6
ERCC8	5	8	3	1	2	7	19
ADAMTS6	5	5	4	4	3	11	9
H6PD	1	5	8	2	3	9	10
VAMP3	1	27	41	23	20	29	46
PER3	1	16	19	11	8	9	20
UTS2	1	0	0	0	0	0	0
TNFRSF9	1	0	0	0	0	0	0
EPN3	17	35	15	18	18	32	34
LTBP1	2	116	164	106	122	135	155
RCN1	11	41	35	31	35	70	62
ELN	7	0	0	0	0	15	24
RFC2	7	27	17	18	23	27	17
ARID1B	6	14	24	13	13	26	22
CLPTM1L	5	47	35	30	23	47	64
NEDD4L	18	36	35	48	7	26	21
FOXP3	X	0	0	0	0	0	0
PPP1R3F	X	17	17	7	19	17	15
HEXB	5	37	41	21	36	28	30
PTCD2	5	2	6	2	4	0	8
NEXMIF	X	0	0	0	0	0	0
JKAMP	14	33	32	16	19	29	23
DKK3	11	248	221	128	180	265	231
ARHGEF5	7	0	0	0	0	0	0
NFE2L3	7	0	0	0	0	0	0
MCUR1	6	61	51	43	45	67	63
LIMA1	12	1	1	0	0	1	1
LETMD1	12	11	12	9	7	19	16
SLC4A8	12	0	0	1	0	1	1
LAMC3	9	0	0	1	0	0	0
PTGER3	1	1	3	0	0	8	7
TNIP3	4	0	0	0	0	0	0
MAPK9	5	18	52	17	31	46	39
COL23A1	5	4	2	5	3	7	13
BCAR1	16	46	59	22	31	72	56
FAM160A2	11	8	12	7	5	19	16
HERPUD1	16	21	19	19	7	39	39
HOMER3	19	17	19	13	8	31	25
RAD51	15	7	5	4	1	6	11
POLQ	3	0	2	3	0	1	2
PIK3CB	3	17	6	4	12	14	12
CYBA	16	6	7	4	3	30	26
THOC3	5	8	15	1	4	8	15
HEBP2	6	82	84	46	49	94	89
MPHOSPH9	12	4	6	5	1	1	2
PLEKHA5	12	22	11	9	14	13	21
PRSS8	16	1	0	0	0	0	2
SIKE1	1	13	15	7	13	24	22
RRP12	10	6	5	7	3	10	9
FNIP2	4	7	9	6	6	5	9
MSMO1	4	34	48	29	39	37	49
TTC17	11	21	18	7	7	20	29
ALX4	11	0	0	0	0	0	0
FSTL4	5	0	0	1	0	0	0
FOXN3	14	10	11	8	12	22	23
METTL24	6	0	0	0	1	0	0
AKR7A2	1	30	36	31	27	64	48
MRTO4	1	18	10	12	6	16	15
NNAT	20	7	3	3	5	3	7
USE1	19	11	17	5	11	13	25
MCF2L2	3	0	1	0	1	1	0
NRIP2	12	0	0	0	0	0	0
LAMA3	18	1	1	0	1	0	4
AP5M1	14	31	25	15	20	25	33
ANAPC4	4	15	19	5	8	13	10
KCNQ1	11	34	21	31	16	51	47
TRAPPC3	1	39	63	33	24	48	68
THRAP3	1	20	29	15	20	43	45
PHPT1	9	488	418	299	296	403	407
ENTPD2	9	0	0	0	0	0	0
LY75	2	0	0	0	0	0	0
ARID4B	1	27	28	17	24	38	32
OPN3	1	8	16	7	10	10	11
SDCCAG8	1	5	11	7	6	5	17
PTPRN	2	0	0	0	0	0	1
HHAT	1	4	2	1	6	7	8
KIF1B	1	21	55	17	26	34	33
FOXC1	6	0	1	0	1	4	3
TBC1D22A	22	11	9	6	7	17	7
SYNE2	14	14	20	9	18	33	19
PLEKHH1	14	4	0	0	1	3	3
ATP9A	20	6	18	3	6	10	19
SPO11	20	0	0	0	0	0	0
CBLN4	20	0	0	0	0	0	0
CHRDL2	11	0	0	0	0	0	0
FAM168A	11	16	14	12	11	21	35
RELT	11	0	1	0	0	2	5
GALC	14	2	3	1	1	5	5
NOP58	2	15	18	11	8	18	23
SZRD1	1	82	79	78	45	114	93
KCNH2	7	80	111	78	80	123	146
CUL1	7	47	43	32	43	63	61
FAM114A2	5	11	12	6	14	10	11
CYFIP2	5	29	37	23	22	80	61
TAB2	6	35	36	22	27	61	60
GINM1	6	37	50	30	38	35	31
EIF2AK2	2	5	11	5	4	16	13
USP36	17	8	2	1	1	11	12
KMT2C	7	5	8	6	4	15	20
MCOLN3	1	0	0	0	0	0	0
CCDC85A	2	8	6	7	6	10	12
PUM2	2	32	27	14	27	45	26
MRPL43	10	42	60	29	37	68	88
ITIH4	3	0	0	0	0	0	0
ITIH1	3	0	0	0	0	0	0
HPF1	4	24	27	31	23	39	30
ZFR	5	40	50	46	25	48	51
ZNF280C	X	2	2	4	0	3	1
NPFFR2	4	0	0	0	0	0	0
PHF21B	22	0	0	1	0	5	0
TRAF1	9	0	0	0	0	0	2
RC3H2	9	19	17	13	8	15	21
IL17RB	3	2	1	0	0	2	2
TRAF3IP2	6	10	9	2	4	18	9
GYG2	X	10	5	5	3	14	18
DCBLD2	3	94	142	65	79	95	78
SERPINB3	18	0	0	0	0	0	0
SOAT1	1	1	1	5	1	3	5
PKP2	12	344	369	269	229	239	227
MSH4	1	0	0	0	0	1	0
F7	13	0	0	0	0	0	0
GDI2	10	132	134	83	83	134	151
PRDM1	6	0	0	0	0	0	0
ATG5	6	30	27	11	18	16	14
TMCC3	12	0	0	0	0	2	0
PITHD1	1	28	30	29	24	42	30
MTA3	2	14	13	9	17	17	29
USP13	3	37	34	27	22	31	37
ATP11B	3	6	11	9	6	16	13
LAMC2	1	0	1	1	4	0	0
CDK14	7	38	35	42	22	36	41
SEC61A1	3	63	49	39	34	72	84
PPP1R12A	12	26	28	12	15	29	29
RASGRF1	15	0	0	0	0	0	0
CAMK2B	7	15	15	7	9	18	15
CROCC	1	1	0	1	0	4	2
POLR3E	16	13	6	3	4	12	9
ATP2B4	1	176	151	113	109	129	148
ZC3H11A	1	20	23	9	5	25	33
RIOK2	5	9	9	9	7	11	11
YIPF1	1	7	9	8	7	17	19
NDC1	1	6	6	4	9	17	16
DGKG	3	2	2	6	0	1	4
FLYWCH1	16	3	6	5	9	11	17
UNKL	16	5	1	2	3	3	7
TBXAS1	7	6	1	0	0	0	0
PARP12	7	11	9	6	6	33	33
ALDH18A1	10	8	7	2	4	11	17
TARBP1	1	1	2	5	3	5	7
GATB	4	55	51	45	33	34	31
MXD1	2	1	0	2	2	5	4
CDK17	12	5	7	15	7	8	11
DNAJC25	9	10	8	4	1	3	11
SLC2A3	12	15	16	11	9	16	32
PSD	10	9	7	6	4	9	8
CTDP1	18	2	3	9	3	11	4
YBX3	12	122	205	131	167	187	271
STYK1	12	0	0	0	0	0	0
WNK1	12	69	74	51	38	74	71
RPS17P5	6	0	0	0	0	0	0
CCAR1	10	10	6	10	6	12	6
OGFR	20	17	16	11	19	31	22
GNA15	19	0	0	0	0	0	0
CREB3L3	19	0	0	0	0	0	0
PIGV	1	5	1	1	0	5	1
PTPRU	1	5	7	5	14	28	31
SNRNP40	1	10	20	14	8	15	12
RIMBP2	12	0	0	0	0	0	0
COL11A1	1	0	0	0	4	1	2
QSER1	11	11	11	5	4	23	20
MPC1	6	155	175	131	135	128	187
ACAA1	3	43	46	27	14	38	38
BCAT1	12	1	1	0	0	3	7
HDAC7	12	4	5	4	3	9	12
LZTS1	8	0	3	2	0	2	3
PRDM6	5	1	1	0	0	1	1
WNT8A	5	0	0	0	0	0	0
SPAG4	20	3	2	1	1	10	7
NCKAP1	2	81	94	82	64	85	142
MRPS35	12	42	40	42	36	62	53
GUCY1B1	4	19	21	16	34	23	38
SFSWAP	12	11	4	5	5	17	14
TNK2	3	5	3	1	2	6	6
MON2	12	16	7	5	4	12	11
CDH3	16	24	31	29	26	31	22
ARSF	X	0	0	0	0	0	0
GPBP1	5	27	28	16	18	30	30
DGAT2	11	1	3	0	2	6	9
ZNF112	19	4	1	3	2	3	6
CS	12	116	99	85	87	201	205
LTK	15	0	0	0	1	0	0
MRPS24	7	105	121	68	82	137	135
ELMO2	20	30	20	13	15	25	22
WAPL	10	13	9	12	7	15	12
VMP1	17	22	39	23	30	41	43
APPBP2	17	10	14	14	7	8	8
POLD1	19	7	6	7	10	23	12
SEZ6	17	0	0	0	0	0	0
EIF4B	12	118	190	144	137	221	294
SLC6A16	19	2	1	1	0	0	1
BICRA	19	1	3	1	1	2	5
SPHK2	19	2	2	1	1	3	0
RPL18	19	1047	935	707	710	1451	1475
CA11	19	6	5	3	8	15	16
ISOC2	19	101	71	50	48	68	82
U2AF2	19	24	46	39	23	33	47
EPN1	19	61	69	38	43	69	86
MED29	19	27	26	29	15	54	51
AHRR	5	0	0	0	0	0	0
GSC2	22	0	0	0	0	0	0
ZNF275	X	6	2	3	4	20	14
MTMR1	X	6	7	10	6	12	16
GPC1	2	194	169	145	171	192	185
ADCK1	14	3	3	2	3	5	9
HAGH	16	45	55	34	43	72	67
RNF4	4	25	22	17	18	24	31
CASP8	2	0	0	0	0	0	0
LIMCH1	4	13	13	6	32	21	14
INTS13	12	6	16	4	11	6	11
TM7SF3	12	19	16	14	15	21	16
DLX3	17	0	0	0	0	0	0
SPA17	11	11	7	4	6	0	2
TSPAN32	11	2	2	0	1	3	2
CCN5	20	0	0	0	0	0	0
DMRT3	9	0	0	0	0	0	0
ST3GAL6	3	32	28	19	20	22	29
ATP2C2	16	0	0	0	0	0	0
NGFR	17	0	0	0	1	0	0
CDON	11	8	6	3	3	0	3
TAF2	8	4	2	4	4	5	7
HIPK2	7	30	26	18	22	21	27
TNPO3	7	32	17	17	14	13	23
BORCS8-MEF2B	19	9	15	1	0	9	3
RFXANK	19	42	27	30	17	48	65
TMEM161A	19	12	8	15	3	24	15
LPAR2	19	0	1	0	1	1	1
CTSA	20	51	41	34	29	56	55
SUGP2	19	30	26	12	28	26	25
SLC12A2	5	5	8	4	3	2	4
SNX24	5	21	7	9	8	22	17
EYA2	20	0	0	0	0	0	0
CNN2	19	45	32	21	30	51	40
ABCA7	19	2	1	1	0	1	2
SNCAIP	5	8	9	9	8	23	16
DDX20	1	15	20	10	6	13	14
BTBD1	15	96	86	73	57	135	119
FAR2	12	0	0	1	1	0	0
BCAS1	20	0	0	0	0	0	0
POU1F1	3	0	0	0	0	0	0
CHI3L2	1	0	0	0	0	0	0
SBNO2	19	7	6	2	8	6	8
PMS1	2	9	4	7	5	15	12
HMG20B	19	40	41	23	42	54	69
CALCRL	2	0	0	0	0	1	0
TAF11	6	35	36	16	16	24	31
ANKS1A	6	5	8	7	2	11	19
AP3D1	19	37	28	19	28	28	43
ZNF76	6	16	14	7	18	11	13
SLC9A3R2	16	7	11	4	4	16	22
NTHL1	16	8	11	10	15	42	28
UHRF1BP1	6	13	13	7	8	13	20
GNAI3	1	7	16	14	8	11	8
IPO5	13	67	56	53	43	75	91
OAT	10	4	10	7	9	9	23
WDR3	1	9	6	2	9	6	14
PKN2	1	19	21	19	15	14	23
WDR18	19	39	42	28	31	76	71
TRAM2	6	7	12	7	8	9	3
NTN1	17	1	0	3	2	2	1
GLP2R	17	0	0	0	0	0	0
MCM10	10	4	1	5	3	6	2
DGKA	12	0	4	0	2	3	4
ERBB3	12	5	5	4	2	17	24
ROPN1	3	0	0	0	0	0	0
ANKRD44	2	0	1	0	0	0	0
KARS	16	96	112	70	75	91	105
ADAT1	16	2	2	0	2	3	3
PDIA5	3	5	3	1	0	7	5
TBC1D22B	6	5	5	4	5	4	8
NDUFB4	3	403	438	326	324	338	521
SPEN	1	2	8	3	2	7	9
MYLK	3	17	19	17	19	39	41
ZC3H15	2	31	33	28	23	21	43
MAP2K4	17	23	26	20	17	30	26
TMEM206	1	3	2	2	2	1	2
SNAP91	6	42	63	40	41	17	14
SLK	10	21	20	14	20	31	27
CYB5R4	6	7	14	2	10	6	13
COL17A1	10	0	0	0	0	0	0
GSTO2	10	4	0	0	0	1	0
SEC61A2	10	12	14	10	5	15	17
PRKCQ	10	0	0	0	0	0	0
TLE2	19	23	34	17	16	43	41
ASB1	2	26	19	15	15	29	19
FAM107B	10	6	2	2	2	7	6
ME1	6	3	1	2	7	3	5
TBC1D1	4	57	57	35	39	53	57
CDK13	7	9	11	9	7	15	15
MTHFD2	2	28	35	31	28	49	40
SLC9A7	X	1	2	1	0	2	2
FOXJ2	12	9	13	6	9	15	19
YBX1	1	642	1373	1020	1009	824	1631
AC011529.1	19	0	0	0	0	0	0
PPP2R5A	1	97	79	58	53	100	96
CTNNA2	2	0	0	0	0	0	0
ELAVL1	19	26	36	24	25	41	48
TIE1	1	0	1	0	0	2	0
DIP2B	12	15	23	21	11	15	28
SMARCD1	12	7	10	3	12	10	12
KDM4A	1	19	21	11	13	17	17
NFYC	1	46	48	45	31	62	59
ZMYND12	1	1	1	1	1	4	2
SLC9A3	5	6	6	6	3	9	7
NGEF	2	0	0	0	0	2	1
ASPM	1	2	7	3	5	6	3
CD84	1	0	0	0	0	0	0
ELOVL1	1	18	20	16	14	15	18
SPI1	11	0	0	0	0	0	0
ZNRD1	6	21	20	21	15	22	18
MPPED2	11	27	33	9	15	28	29
CLDN18	3	0	0	0	0	0	0
ZBTB11	3	3	5	4	4	7	11
ATXN3	14	4	5	5	3	3	4
GOLGA5	14	12	10	5	6	14	11
FGFR2	10	4	3	3	1	1	3
LRRC40	1	14	13	5	11	13	10
ISOC1	5	80	133	81	77	131	189
EML1	14	19	13	5	10	23	18
TRMT11	6	6	4	3	4	9	11
THUMPD1	16	7	6	5	7	12	8
MSANTD3	9	18	25	18	22	20	26
KIF26A	14	4	4	0	3	5	4
ATG2B	14	1	2	4	5	4	5
ARFGEF1	8	7	11	4	7	11	20
ACSM2B	16	0	0	0	0	0	0
ZFAT	8	9	1	1	2	2	3
MTFR1	8	4	8	1	5	4	4
STAG3	7	0	0	0	0	0	0
FECH	18	15	24	16	17	31	39
MYO9A	15	6	7	2	4	12	12
DDX3Y	Y	21	13	9	12	28	25
PFKP	10	391	479	348	316	670	735
IDI1	10	62	87	52	48	52	50
SP100	2	5	4	4	1	12	6
KLF6	10	20	21	11	20	26	28
PLPP1	5	22	29	21	13	16	22
NEO1	15	6	10	17	10	18	14
TRAM1	8	31	39	44	27	42	49
PHKA1	X	4	4	4	4	5	5
TNFRSF1A	12	18	12	7	10	17	24
CACNB1	17	10	7	10	2	11	7
EVI5	1	8	6	5	1	5	4
STOML1	15	7	12	7	2	9	10
PKM	15	296	536	408	356	802	1040
DHX29	5	5	10	3	3	12	12
DNTTIP2	1	22	17	14	8	19	23
METTL22	16	8	7	4	8	12	17
TP53BP1	15	18	17	23	24	27	21
TRO	X	19	36	21	22	37	30
RRP15	1	11	14	7	6	12	16
RHOA	3	206	328	200	211	258	336
DHX8	17	4	14	6	6	8	15
PMS2P4	7	0	0	1	2	3	1
PRKCZ	1	19	18	9	10	39	28
ZFY	Y	2	1	1	4	4	4
IARS2	1	40	68	56	34	103	132
SYT1	12	0	0	0	0	0	1
NAV3	12	3	0	2	1	1	3
IDH3G	X	44	31	22	30	55	50
ROGDI	16	72	53	39	34	75	71
PDZD4	X	0	2	0	0	2	0
ATP2B3	X	0	0	0	0	0	0
ROCK1	18	17	15	15	14	21	16
CBFB	16	12	15	11	11	17	14
PDK3	X	11	13	6	7	29	16
HYAL2	3	31	21	14	12	25	31
HDAC4	2	2	0	0	2	1	0
RASSF1	3	10	8	4	6	11	5
FGFR3	4	0	0	0	0	0	0
IFI35	17	7	3	5	5	15	24
HEATR6	17	7	15	12	7	15	13
COASY	17	17	16	15	10	32	27
PLEKHH3	17	15	24	10	15	31	28
MEF2A	15	148	175	123	122	191	222
OTUD5	X	34	26	14	16	33	36
TFE3	X	20	18	6	9	10	13
TBC1D25	X	7	16	8	6	23	22
ACSL4	X	16	18	23	13	22	25
INPP5A	10	69	65	48	51	73	76
GPKOW	X	17	12	8	7	17	21
GRIPAP1	X	4	10	5	9	8	16
FTSJ1	X	9	9	6	5	7	10
PRR11	17	4	8	3	11	7	6
REEP1	2	19	27	13	19	25	17
ATP11A	13	35	35	33	26	41	45
POLR1A	2	4	5	2	4	10	6
LAPTM4A	2	341	394	300	293	374	434
TTC7A	2	4	5	3	10	0	2
IP6K2	3	23	32	20	23	24	29
STON1-GTF2A1L	2	2	3	2	0	1	0
SRBD1	2	1	3	1	4	8	4
KIF2A	5	15	18	6	6	15	14
RASGRP2	11	12	8	7	4	13	14
PSME4	2	15	10	8	13	18	21
IFT80	3	14	13	7	12	13	17
SIRT2	19	32	13	15	21	29	38
ERLEC1	2	16	32	22	14	19	23
PPP2R5B	11	9	2	4	8	8	10
PYGM	11	26	29	18	15	64	58
PAGE1	X	0	0	0	0	0	0
PITX1	5	0	0	0	0	0	0
TRPC7	5	0	0	0	0	0	0
MAST4	5	8	16	16	8	17	22
ADGRF5	6	0	0	0	0	0	0
SDK2	17	3	5	2	3	5	3
ADAM7	8	0	0	0	0	0	0
NUP133	1	19	25	18	18	32	35
NUCKS1	1	81	114	79	78	125	195
VPS35	16	80	137	73	86	91	96
DNAJA2	16	41	55	32	33	55	70
BCL3	19	6	2	2	4	4	5
KCNAB2	1	3	2	2	7	5	4
ABCC9	12	2	3	2	0	8	9
GAL	11	0	0	0	0	0	0
CLEC2D	12	10	3	7	4	11	7
FUNDC1	X	25	16	18	13	24	19
MAOB	X	3	14	2	9	11	17
RORA	15	2	6	2	8	5	3
DRD4	11	1	0	0	0	0	1
TGFBR3	1	1	7	4	7	20	11
PLA2G10	16	0	0	0	0	0	0
HES2	1	0	0	0	0	0	1
ATP1B3	3	35	37	18	18	41	33
NEDD4	15	4	3	1	7	2	2
PIGB	15	2	1	3	0	1	1
MAPK6	15	20	19	11	13	25	16
GNB5	15	17	26	17	11	32	32
RAB27A	15	7	14	3	3	9	9
HDHD5	22	20	10	18	15	46	43
UFD1	22	38	30	19	19	30	27
LRP6	12	10	12	5	12	9	10
GUCY2C	12	0	0	0	0	0	0
SCT	11	0	0	0	0	0	0
PHRF1	11	6	6	3	6	8	14
ELP1	9	15	12	23	12	15	23
NUCB2	11	36	35	30	25	52	28
PFN2	3	124	177	143	136	97	140
PTPN3	9	3	10	3	3	4	3
SPTB	14	16	16	11	4	20	9
DAPP1	4	1	0	0	0	0	0
FGF10	5	3	1	1	4	1	0
SLC44A1	9	14	10	2	5	22	34
TMEM260	14	8	5	3	4	8	12
SMG6	17	5	7	6	6	10	9
EXOC5	14	25	20	18	28	19	30
CLTCL1	22	2	2	0	1	0	2
FGF22	19	0	1	0	0	0	0
FSTL3	19	30	21	17	18	17	15
DGCR2	22	29	36	28	28	31	34
RNF126	19	17	17	10	20	36	32
MNT	17	5	5	1	3	12	4
ZXDC	3	8	6	6	4	5	10
JMJD6	17	6	16	13	13	17	15
POLB	8	22	29	22	18	31	38
ST6GALNAC1	17	0	0	0	0	0	0
WIPI1	17	26	20	17	22	17	20
FRMPD1	9	0	0	0	0	0	0
GBA2	9	12	36	20	14	41	46
NDST1	5	29	24	17	17	19	31
ASNS	7	17	13	10	10	26	15
AP3M2	8	10	9	7	4	15	11
CNGB1	16	0	0	0	0	0	0
ST6GALNAC2	17	0	1	0	0	0	1
CHAT	10	0	0	0	0	0	0
PABPC1	8	121	178	129	111	170	245
TESK2	1	0	2	1	2	0	1
CFAP20	16	80	81	76	70	87	85
CSNK2A2	16	30	29	18	16	33	36
AL162171.1	14	36	40	32	29	34	41
EIF2B3	1	21	17	13	9	27	22
CAMK2A	5	21	25	24	10	19	24
TCOF1	5	6	6	4	5	12	7
CDC42	1	111	142	129	93	120	144
OSBPL3	7	1	2	4	6	4	8
EPHA8	1	0	0	0	0	0	0
SLC12A3	16	0	2	0	1	0	0
RAD18	3	6	0	1	3	4	4
ATP2B1	12	3	6	4	2	13	8
TRPM5	11	0	0	0	0	0	0
NCK2	2	43	28	14	22	30	33
MAP4K4	2	82	80	63	40	73	91
MGAT4A	2	3	0	2	2	5	3
RPL31	2	2348	2142	1477	1441	3247	3499
WDR1	4	118	142	95	90	124	157
SNX13	7	18	16	10	14	14	16
AP001034.1	11	0	0	0	0	0	0
ARHGAP10	4	14	8	12	12	12	7
RPS6KA2	6	20	24	16	31	31	44
ING3	7	5	13	7	8	6	11
VASH1	14	15	30	6	8	22	28
LMCD1	3	8	11	1	4	22	17
BUD23	7	74	63	42	40	62	64
SEL1L	14	20	16	17	16	34	39
TRIP13	5	2	4	4	2	5	2
ATP6AP1	X	92	81	50	53	83	103
TCF3	19	20	25	18	13	25	35
TRIB2	2	20	17	16	12	24	9
DAZAP1	19	48	55	32	38	58	63
MBD3	19	80	63	44	56	81	79
PRLH	2	0	0	0	0	0	0
HLTF	3	14	11	12	7	16	15
FAM50A	X	70	58	32	40	69	63
FAM3A	X	91	90	55	57	93	92
CPSF1	8	15	26	17	16	29	27
MYO3B	2	0	0	0	0	0	0
CYBRD1	2	5	4	1	2	7	9
CDH19	18	0	0	0	0	0	0
PDCD2	6	39	46	33	37	39	57
SLC6A15	12	0	0	0	0	0	0
RDH11	14	31	31	25	18	26	32
PRKACA	19	97	73	50	57	108	91
ADGRL1	19	8	7	1	4	24	19
SPP2	2	0	0	0	0	0	0
ACTN1	14	120	130	95	107	82	94
ZFYVE26	14	0	8	2	5	5	7
RPS6KA6	X	1	2	3	2	2	1
EPN2	17	20	26	10	12	28	33
PTPN18	2	4	0	3	5	11	10
LIMS2	2	171	153	81	82	182	173
ASIC4	2	0	0	0	0	0	1
SPEG	2	72	68	34	40	102	80
LNX1	4	0	0	0	0	0	1
ALDH3A2	17	40	73	54	52	49	58
TFRC	3	33	44	31	25	97	73
SREBF1	17	6	8	6	11	7	8
TRPC5	X	0	0	0	0	0	0
AFF4	5	26	21	11	22	34	41
UBE2D1	10	7	26	10	24	18	25
MPP5	14	8	12	9	11	11	18
RHOBTB1	10	16	19	13	8	14	10
SMC1A	X	14	27	13	25	36	31
HSD17B10	X	108	89	74	55	96	84
MARK2	11	14	16	7	14	21	21
HMMR	5	3	8	1	5	1	13
CHFR	12	7	9	9	8	18	10
TRHDE	12	1	1	1	0	1	0
P4HA2	5	25	27	30	26	48	40
FCGR2B	1	0	0	0	0	0	0
NFATC3	16	6	9	2	8	13	13
TRNT1	3	9	11	4	5	7	6
ACADVL	17	32	59	22	32	116	122
STK10	5	1	5	1	5	1	3
FBXW11	5	51	47	40	46	87	74
ACAP1	17	2	6	2	3	2	9
CRMP1	4	15	8	11	5	3	2
EVC	4	1	0	0	1	1	0
DERL2	17	30	16	14	15	30	21
SIDT1	3	0	0	0	0	0	0
NDE1	16	9	2	11	6	6	12
MRVI1	11	0	0	0	1	0	0
TMEM38A	19	8	7	5	6	21	18
AP1M1	19	39	47	24	27	51	49
PVR	19	38	18	20	11	15	14
XRCC1	19	10	11	12	7	16	21
SCARB1	12	3	4	3	2	20	8
CYP2W1	7	0	0	0	0	0	0
MCM2	3	25	28	16	22	41	32
MOV10L1	22	0	0	0	0	0	0
PANX2	22	0	2	2	0	2	2
SELENOO	22	15	13	9	10	17	15
TP63	3	0	0	0	0	0	0
ALPK1	4	0	0	0	1	0	0
LLGL2	17	11	13	8	4	20	15
PDE8A	15	13	3	4	3	2	3
CLCN4	X	7	7	7	10	11	13
NLE1	17	6	14	6	8	10	6
SDHA	5	135	104	68	71	207	208
SMARCE1	17	88	83	70	57	98	100
FNDC8	17	0	0	0	0	0	0
GSDMB	17	3	0	1	2	1	0
KDM5A	12	6	6	4	7	9	8
ADAM11	17	26	13	12	12	34	27
PPP2R3A	3	41	55	49	40	53	49
FERMT2	14	73	85	51	61	73	55
ABCB11	2	0	0	0	0	0	0
DHRS9	2	3	6	5	4	5	13
CD5L	1	0	0	0	0	0	0
PTGS2	1	0	0	0	0	0	0
IGF2BP2	3	12	14	13	10	36	28
MAP3K13	3	5	12	3	1	3	10
ST6GAL1	3	33	39	37	24	71	97
TBX21	17	0	0	0	0	1	0
VDAC1P1	X	0	0	0	0	0	0
FRY	13	69	66	53	46	90	76
PICALM	11	61	67	35	32	55	54
NSF	17	5	11	10	10	3	8
GLI2	2	2	0	0	0	1	4
CLASP1	2	22	14	12	7	21	28
MRPS34	16	55	57	34	24	93	75
NOTCH3	19	0	0	0	0	3	4
CLNS1A	11	46	43	22	23	47	45
PPP2R2C	4	0	0	0	0	0	0
TEAD2	19	22	33	30	24	51	59
EED	11	19	13	10	10	15	17
CDHR2	5	0	0	0	0	0	0
SNCB	5	0	0	0	0	0	1
TSG101	11	80	71	33	41	93	97
NCBP3	17	22	19	16	17	21	30
ATP2A3	17	1	0	0	0	3	2
CA12	15	0	0	0	0	0	0
MGLL	3	1	2	1	1	4	4
NTN4	12	8	6	3	8	8	4
BCS1L	2	18	20	15	14	23	32
NUAK1	12	23	16	9	18	30	33
DPP8	15	9	5	11	6	14	14
SLC24A1	15	0	0	0	0	0	0
ZNF532	18	22	17	13	14	21	21
SCARF1	17	0	2	1	1	1	0
LMAN1	18	23	16	16	10	20	26
HACD3	15	26	33	22	21	25	25
IPCEF1	6	0	0	0	0	0	0
ZZEF1	17	10	6	2	3	5	15
NOX3	6	0	0	0	0	0	0
ENO1	1	483	371	327	245	1134	1084
SLC12A1	15	0	0	0	0	0	0
MYDGF	19	42	40	20	26	57	44
ANO8	19	5	12	2	3	7	10
TUBE1	6	11	15	10	15	10	5
ARHGEF10L	1	19	21	17	15	23	31
TXK	4	0	0	0	0	0	0
WSCD2	12	2	8	0	6	3	2
KCNQ2	20	2	8	6	6	3	8
TACR2	10	0	0	0	0	0	0
ACTR6	12	19	11	13	9	19	16
TIPIN	15	2	6	0	2	3	9
SRI	7	50	82	61	48	64	101
EIF4G3	1	12	7	8	7	23	19
NUP37	12	13	14	22	9	19	23
SEMA3A	7	8	5	5	3	6	13
GTSE1	22	7	7	5	5	1	7
SEMA3C	7	5	5	0	4	10	9
TTC38	22	17	8	7	10	15	16
ACAT1	11	112	103	68	75	160	107
GRAMD4	22	12	12	14	10	11	20
CELSR1	22	7	15	7	8	18	15
WNT8B	10	0	0	0	0	0	0
ZNF638	2	22	19	12	7	26	27
SLC25A40	7	7	8	4	2	10	6
TIMM21	18	20	25	26	18	28	32
ADD2	2	4	3	5	4	11	10
FGF4	11	0	0	0	0	0	0
RASAL2	1	28	16	17	11	19	8
VPS9D1	16	13	11	5	9	16	11
ZNF37A	10	1	4	1	1	8	1
MARK3	14	23	28	19	18	35	41
SLC25A3	12	963	917	629	632	1033	1078
FNDC3B	3	12	16	10	6	10	11
FOSL2	2	5	8	4	9	8	16
CACNG5	17	0	0	0	0	0	0
CACNG4	17	0	0	0	1	0	0
FRYL	4	7	6	3	5	9	19
TMEM131	2	4	3	6	9	15	14
FSCN1	7	45	49	46	44	35	64
ACTB	7	249	225	148	165	263	278
MOCOS	18	0	0	0	1	1	0
PLD1	3	19	13	11	7	10	16
ATP12A	13	0	0	0	0	0	0
WDR62	19	4	4	1	4	2	1
DLG1	3	23	37	7	8	18	23
RAB7A	3	123	105	85	84	115	129
BCAP29	7	9	22	21	12	6	9
SEC31B	10	1	1	0	0	2	1
SART3	12	17	19	14	15	19	20
ARHGAP15	2	0	0	0	0	0	0
TUBA3D	2	2	2	0	0	4	4
PAX2	10	0	0	0	0	0	0
EXOSC7	3	7	15	16	7	24	27
KIFAP3	1	50	51	46	54	63	55
MKRN2	3	24	28	13	16	28	35
MCM6	2	20	32	27	25	21	26
REXO2	11	62	60	26	30	85	70
RBM7	11	23	25	11	22	17	27
RBMS2	12	6	5	1	2	6	8
BAZ2A	12	6	9	8	8	15	16
PTPN23	3	11	5	7	7	7	8
MLH1	3	24	42	23	31	31	35
UNG	12	23	22	18	19	34	28
FMO4	1	2	3	0	1	6	0
KLHL20	1	5	12	10	6	8	3
RGS11	16	2	3	2	0	4	1
SLC46A1	17	0	0	1	0	2	4
PLXNA2	1	9	6	8	2	13	15
SPAG5	17	7	13	8	8	16	10
ANKRD13A	12	16	16	7	9	22	22
TPD52	8	9	14	13	6	24	33
ACACB	12	9	11	9	4	14	12
TRAF4	17	13	6	7	4	19	23
PAG1	8	5	8	4	5	4	12
GPATCH1	19	3	3	4	3	4	8
ICAM3	19	5	2	1	1	2	1
NT5C2	10	33	37	18	33	22	14
AP002956.1	11	139	104	73	80	75	56
GPC4	X	6	4	0	3	4	2
MBNL3	X	1	0	0	0	0	0
CAMSAP3	19	1	1	0	1	2	2
RAP1GAP	1	1	0	1	1	1	3
XAB2	19	20	23	17	11	25	17
ARHGEF1	19	4	3	2	1	13	6
STXBP2	19	0	0	1	0	5	2
MAP2K7	19	15	15	9	11	17	18
NMRK2	19	23	18	12	19	88	114
DGKD	2	16	16	5	11	23	18
CTTNBP2	7	0	4	1	0	7	3
ACTL6B	7	0	0	0	0	0	0
RARB	3	13	17	12	9	17	24
TOP2B	3	55	76	42	30	96	94
TM9SF3	10	50	56	33	28	63	54
NFKB2	10	14	19	11	6	10	11
UBE2T	1	38	55	43	44	41	59
PPP1R12B	1	87	113	56	64	174	149
DNAJC10	2	29	29	14	11	25	32
GTF3C1	16	27	25	23	17	35	28
IL4R	16	1	0	1	0	0	2
USP33	1	11	31	9	15	26	21
PAK3	X	0	1	0	0	0	0
CAPN6	X	0	0	0	0	0	0
DCX	X	0	0	0	0	0	0
SNRPA	19	24	25	21	21	52	41
SPAG6	10	0	0	0	0	0	0
EXOSC5	19	11	10	8	13	24	27
DYNC1I2	2	44	62	37	51	49	99
APBB1IP	10	0	0	0	0	0	0
LRCH4	7	8	5	5	6	12	12
FAM76B	11	3	2	4	3	4	6
SIRT6	19	19	10	12	13	17	22
TYR	11	0	0	0	0	0	0
POLD3	11	6	8	4	6	13	8
ACTN2	1	1095	1116	793	791	869	835
CAPZB	1	146	154	115	109	134	151
GPR137B	1	9	11	4	7	8	10
NAALAD2	11	0	1	0	1	3	2
JADE1	4	22	27	17	23	13	21
SLC25A43	X	1	0	0	1	0	1
UBE2A	X	43	62	43	46	51	52
FGFR1	8	40	48	36	52	34	52
FKBP6	7	0	0	0	0	0	0
SMC1B	22	0	0	0	0	0	0
FBLN1	22	8	9	5	4	18	40
ITGA8	10	0	2	1	0	6	2
CST7	20	0	0	0	0	0	0
MAP2	2	2	4	1	1	1	1
PIAS2	18	16	10	7	6	11	9
AMPH	7	5	7	3	4	3	6
ARAF	X	23	22	14	9	26	23
MCCC1	3	14	21	14	9	21	17
LAMP3	3	0	0	0	0	0	0
FAP	2	0	0	0	0	1	1
NEBL	10	125	166	102	99	261	276
ACER3	11	2	7	2	3	4	4
UBE2K	4	40	43	24	42	54	34
PIK3C3	18	15	12	11	10	10	12
N4BP2	4	4	1	3	1	3	9
TIGAR	12	9	11	8	5	11	8
TULP3	12	4	9	5	2	7	20
SYNJ2	6	8	4	7	6	11	7
ADCY2	5	0	0	1	0	0	0
PPP2R5C	14	57	75	57	67	103	125
PMS2P1	7	20	11	19	9	8	20
RBFOX1	16	8	21	8	8	25	25
GNB1	1	114	117	72	80	99	117
HOXA9	7	0	0	0	0	0	0
EDN1	6	0	0	1	1	3	0
MLLT10	10	6	7	6	17	11	17
ZCWPW1	7	5	0	4	0	4	4
ADCYAP1R1	7	0	0	1	0	0	0
FGF20	8	0	0	0	0	0	0
P2RY10	X	0	0	0	0	0	0
ITM2A	X	6	8	2	6	21	12
NRDC	1	47	46	30	37	41	65
VDAC3	8	144	175	138	120	154	190
PCM1	8	27	29	26	18	41	39
TNRC6C	17	4	5	2	0	8	8
CBFA2T2	20	8	5	3	4	11	6
BRINP1	9	0	0	0	0	0	0
ITCH	20	1	8	4	6	6	3
PKD2L2	5	0	0	0	0	0	0
TP53INP2	20	28	21	14	17	15	12
SDF4	1	65	61	40	50	71	56
MYH7B	20	24	14	9	5	26	16
BPIFB2	20	0	0	0	0	0	0
TP73	1	0	0	0	0	0	0
TOLLIP	11	34	33	29	17	46	24
UBE2D4	7	15	16	7	10	19	17
CLUL1	18	0	0	0	0	0	0
RUNX1T1	8	10	33	11	14	25	27
CDH17	8	0	0	0	0	0	0
THOC1	18	6	3	1	1	5	2
FKBP7	2	4	9	12	5	8	6
OSBPL6	2	0	0	0	0	0	1
SLC1A3	5	23	30	18	11	39	50
XRCC5	2	99	124	103	78	89	132
LXN	3	4	8	10	0	7	10
SP140	2	0	0	0	0	0	0
MKNK1	1	11	7	13	8	7	11
TNS1	2	74	71	48	58	117	117
REXO1	19	10	1	1	8	9	11
SAR1A	10	34	52	26	34	60	69
CDC14A	1	0	1	0	3	0	2
RAPGEF3	12	0	2	2	0	1	6
CEACAM1	19	0	0	0	0	0	0
SENP1	12	9	4	5	6	3	4
DUSP13	10	4	5	8	9	1	1
CIC	19	14	17	19	12	15	15
LIPE	19	3	10	1	2	8	4
FDFT1	8	138	96	79	88	145	131
PAFAH1B3	19	34	59	33	36	45	71
OPHN1	X	2	7	7	8	8	3
AFM	4	0	0	0	0	0	0
KIF22	16	33	27	22	24	37	35
SCGN	6	0	0	0	0	0	0
CARMIL1	6	7	4	2	2	2	2
PGM1	1	80	92	64	56	130	170
DDX1	2	69	83	48	40	69	79
DNM2	19	45	35	25	29	59	64
EPB41L2	6	1	2	2	3	6	11
RIMS1	6	0	0	0	0	0	0
MOXD1	6	1	0	0	0	2	1
STX7	6	17	24	16	8	34	28
RABL2B	22	5	1	4	7	4	3
KEAP1	19	60	59	34	44	68	50
DDX43	6	0	0	0	0	0	0
PTPRH	19	4	4	3	6	1	8
DCT	13	0	1	0	2	0	1
SLC35C2	20	21	22	8	9	34	29
CRYBG3	3	15	17	8	12	15	19
EPHA6	3	0	0	0	0	4	1
SCTR	2	0	2	0	1	2	0
RFX3	9	3	2	1	0	4	2
RIF1	2	6	4	7	8	9	7
RAB21	12	75	81	61	49	78	92
SLC4A4	4	8	6	9	1	9	13
SMARCA2	9	16	18	18	8	30	25
RDH8	19	0	0	0	0	0	0
SESN1	6	13	12	13	6	20	25
MID2	X	1	0	1	0	2	1
PIH1D3	X	0	0	0	0	0	0
COL5A3	19	0	0	0	0	0	3
SRCAP	16	1	2	3	8	2	12
PUM3	9	9	2	5	10	6	8
CPB2	13	0	0	0	0	0	0
CHRNA3	15	1	2	0	1	2	2
KCNN2	5	9	10	8	8	8	10
CNOT4	7	14	13	11	9	13	15
PSEN1	14	36	24	14	15	29	25
CPOX	3	5	10	3	3	14	18
CLDND1	3	27	41	24	24	25	43
MOK	14	4	12	2	0	12	5
HSP90AA1	14	312	233	195	199	369	396
RBL1	20	5	6	3	2	3	1
DLGAP4	20	28	32	14	13	30	23
IGSF9B	11	11	9	4	9	16	26
CFHR2	1	0	0	0	0	0	0
CROCCP3	1	1	0	0	1	0	1
NDC80	18	12	13	7	5	10	7
AP4E1	15	8	9	2	5	10	6
RSBN1	1	6	14	4	8	6	11
MAGI3	1	5	5	0	2	4	6
CXCL2	4	0	0	0	0	0	0
AFP	4	0	0	0	0	0	0
COL4A4	2	0	0	0	0	0	0
TCF7	5	0	0	1	0	0	2
OSTM1	6	40	24	24	18	23	21
CDH7	18	0	0	0	0	0	0
IMPG2	3	0	0	0	0	0	0
PCNP	3	52	46	40	35	58	82
EXD2	14	9	11	7	15	11	12
ARG2	14	29	39	27	28	76	72
MEF2C	5	14	7	5	6	12	24
PTPRC	1	0	0	0	0	0	0
CACNA1S	1	0	0	0	0	0	0
PKP1	1	0	0	0	0	0	0
UBA5	3	7	12	10	12	11	29
STK17B	2	3	6	6	4	10	9
CDC14B	9	22	24	20	13	26	43
ZNF510	9	3	2	3	1	9	3
LRP2	2	1	0	0	0	0	1
ZNF506	19	2	8	2	4	5	10
JMJD4	1	13	10	9	8	17	12
DUSP12	1	9	9	9	7	8	12
AACS	12	15	21	7	9	18	27
DELE1	5	39	26	19	26	59	34
SLC13A1	7	0	0	0	0	0	0
CADPS2	7	20	17	15	15	14	15
PCDHB4	5	0	1	0	0	2	0
PCDHA6	5	2	4	2	2	0	0
PCDHGA2	5	0	0	0	0	0	0
HSPB11	1	25	32	11	15	22	16
PHLPP1	18	2	1	1	0	1	0
ATP8B1	18	0	1	0	1	2	1
IL12RB2	1	0	0	0	0	0	0
SMARCD3	7	178	170	139	90	149	140
WDR70	5	16	13	5	8	21	11
FYB1	5	0	0	0	0	0	0
MPP4	2	0	0	0	0	0	0
STRADB	2	15	27	17	17	14	23
BZW1	2	46	67	34	38	35	49
PGR	11	4	3	1	4	3	2
C1QTNF3	5	0	1	1	0	1	1
ME2	18	18	17	9	8	21	24
C5orf22	5	11	11	8	15	10	12
CCNT2	2	18	13	11	11	19	16
FAM135A	6	7	3	2	4	7	3
COL19A1	6	1	0	2	2	6	3
EPB41L3	18	30	32	28	21	34	45
COBLL1	2	4	9	4	6	10	7
DLG3	X	14	20	8	12	20	25
KCNK2	1	0	0	0	0	0	0
SERTAD4	1	3	7	2	5	12	20
TRAF5	1	1	1	0	1	2	0
MRPL22	5	82	84	63	62	85	89
GEMIN5	5	5	10	6	5	10	12
OPRK1	8	17	8	9	5	6	11
NFE2L1	17	162	141	100	111	159	168
SEMA5B	3	4	17	5	3	5	3
GSK3B	3	16	23	15	17	19	18
ITGB5	3	59	51	35	35	53	61
ERC1	12	10	21	6	9	17	36
XPO1	2	24	29	26	42	50	49
LINC01587	4	0	0	0	0	0	0
RNF13	3	18	7	12	15	5	10
TRPM3	9	0	1	0	1	0	0
PALB2	16	1	1	3	0	2	3
DOP1A	6	8	7	8	1	8	3
LYRM2	6	20	16	10	9	15	17
BCKDHB	6	6	9	7	6	8	8
KAT6A	8	11	13	10	2	10	14
TUT7	9	12	5	4	2	5	6
ULK2	17	2	7	5	21	17	15
GRHL2	8	0	0	0	0	0	0
TNPO1	5	22	37	13	11	24	29
PLOD1	1	71	72	48	36	132	122
P2RX5	17	0	0	0	0	0	0
ITGAE	17	13	24	27	23	15	12
DIS3	13	15	14	7	7	22	15
PIBF1	13	3	5	6	7	3	9
TDRD3	13	12	19	9	3	15	17
AC000061.1	7	0	0	0	0	0	0
NUFIP1	13	7	4	0	3	3	7
PDS5B	13	8	7	7	5	9	14
OXCT1	5	90	75	42	50	63	63
RRAGB	X	3	7	4	4	8	10
EPYC	12	0	0	0	0	0	0
CYLD	16	9	27	6	8	6	15
SLC27A5	19	9	9	3	6	9	17
ZNF324	19	1	3	2	1	1	4
ZNF671	19	9	6	4	3	10	10
ZNF416	19	4	2	1	4	3	4
ZNF586	19	6	0	0	2	6	6
ZNF446	19	5	7	3	12	12	13
ZNF264	19	3	0	2	8	11	10
RPS5	19	961	837	611	592	1383	1340
FAT1	4	33	27	34	16	42	35
YTHDC1	4	28	28	17	20	31	29
CHMP2B	3	19	21	20	24	13	24
SMAP2	1	15	8	5	4	12	10
PPIE	1	23	25	28	24	32	31
ZMPSTE24	1	12	17	15	7	8	7
STARD7	2	110	118	87	87	128	125
NOA1	4	23	17	7	17	17	19
REST	4	4	13	11	5	13	14
HAL	12	0	0	0	0	0	0
SSH1	12	16	19	8	9	11	18
GSTP1	11	404	271	231	202	481	438
APLP2	11	293	308	141	222	247	285
FAM234B	12	1	2	4	3	5	1
SLCO1A2	12	1	0	0	0	0	0
WBP11	12	44	43	24	33	58	62
EIF3I	1	104	93	97	82	143	119
NKAIN1	1	0	0	0	0	0	0
COL16A1	1	23	30	14	11	31	45
TXLNA	1	4	7	9	0	7	10
APOB	2	0	0	0	0	0	0
NCOA1	2	11	15	4	6	21	19
AGBL5	2	10	11	13	14	25	25
EFR3B	2	2	2	0	4	3	2
KIF3C	2	6	3	8	4	4	3
RAB10	2	44	69	45	58	59	80
GCKR	2	0	0	0	0	0	0
HADHA	2	222	208	165	138	195	194
MAPRE3	2	11	17	7	14	19	23
CAD	2	4	9	3	4	8	3
CD59	11	238	258	151	166	224	201
CD82	11	4	10	2	3	8	12
BCORL1	X	1	0	0	1	2	4
ATRX	X	17	16	16	16	28	16
AK6	5	14	23	17	12	18	29
FCN1	9	0	0	0	0	0	0
MYNN	3	9	13	9	9	15	14
MECOM	3	3	1	0	0	1	0
SCAMP1	5	24	23	19	19	33	38
PREP	6	16	8	7	6	21	18
HACE1	6	5	7	2	3	12	11
SEH1L	18	21	14	12	7	24	23
WDR47	1	4	7	4	5	4	7
WDFY1	2	10	10	9	7	12	15
OVGP1	1	1	1	0	1	2	1
SLC25A24	1	17	20	11	17	25	24
MAP3K4	6	8	4	7	2	8	8
PILRA	7	0	0	0	0	0	1
IGSF9	1	2	7	1	0	3	2
ABCB1	7	0	0	0	0	0	0
ZNF213	16	8	6	5	5	6	8
AKR1B1	7	220	209	170	168	323	376
CPNE3	8	45	29	29	33	71	71
RRN3	16	8	15	15	8	17	13
CTTN	11	26	22	17	15	18	20
WNT11	11	1	1	0	1	7	6
MTIF2	2	9	17	9	6	9	11
DDHD2	8	11	10	11	4	15	27
TTC39A	1	7	6	4	2	7	10
EPS15	1	43	39	38	22	47	42
ORC1	1	2	2	0	0	2	0
MGST2	4	49	96	68	62	73	96
CHERP	19	9	10	4	15	17	22
ATG16L1	2	14	8	8	10	5	6
USP40	2	7	8	0	2	6	5
POMGNT1	1	46	53	35	26	85	76
RAD54L	1	2	1	3	2	2	2
MAST2	1	14	32	15	23	48	37
DNAJA1	9	122	105	87	104	110	136
B4GALT1	9	12	13	8	6	26	20
CHMP5	9	58	58	50	67	57	65
NFX1	9	21	21	20	13	26	15
AQP6	12	0	0	1	0	1	0
DIMT1	5	9	6	12	7	3	15
IPO11	5	12	8	5	11	10	10
FOLH1	11	0	0	2	2	0	0
EIF2AK1	7	31	35	30	26	54	67
NME8	7	0	0	0	0	0	0
EPDR1	7	24	33	16	24	41	42
SNX10	7	0	0	0	1	2	1
SEPHS1	10	39	38	29	32	22	37
MRPL28	16	112	88	63	62	114	100
HBQ1	16	0	0	0	0	0	0
ITPKC	19	6	5	9	0	12	5
CEACAM6	19	0	0	0	0	0	0
FAT2	5	0	0	0	0	0	0
RBM22	5	18	27	19	28	21	33
TMED2	12	58	68	57	34	70	85
ERO1B	1	5	6	3	3	4	6
ZFAND6	15	90	88	46	57	99	120
HSD17B2	16	0	0	0	0	0	0
TXLNG	X	4	1	0	2	5	6
PPEF1	X	0	0	0	0	0	0
LAT2	7	0	0	0	0	0	0
HUWE1	X	28	46	20	21	30	54
ZW10	11	17	4	4	10	13	10
ALG9	11	16	12	7	12	16	25
MYBPC2	19	0	0	0	0	0	0
NOX4	11	3	1	0	1	0	1
ACOX3	4	14	16	3	9	11	10
MTMR2	11	23	15	6	10	71	9
PPP1R15A	19	28	28	29	31	44	63
HSD17B14	19	0	1	1	1	1	0
TRIP6	7	16	14	14	17	31	32
ACHE	7	0	0	0	0	0	1
FTL	19	331	343	263	270	592	609
SRRT	7	16	24	15	13	25	23
BAX	19	32	46	16	19	42	40
NLK	17	6	11	4	2	12	22
PIGS	17	67	55	53	40	74	81
ADAMTS2	5	1	0	0	0	2	3
TMPRSS11E	4	0	0	0	0	0	0
ATXN7L3	17	15	16	15	11	17	22
PGS1	17	18	16	9	10	16	14
PSMC5	17	120	91	87	65	97	82
UIMC1	5	12	22	8	21	15	15
CETP	16	0	0	0	0	0	0
MMP2	16	5	6	0	3	18	27
MT3	16	5	4	5	5	23	33
LPCAT2	16	0	2	3	0	2	1
GNAO1	16	2	3	1	0	3	0
OGFOD1	16	8	14	12	10	11	13
SH3BP2	4	6	8	5	2	8	6
NOP14	4	8	6	4	5	9	9
ADD1	4	74	56	84	48	80	102
L2HGDH	14	7	5	2	1	4	7
TXNDC16	14	3	8	6	3	11	12
RTRAF	14	205	177	120	121	182	161
NID2	14	59	52	42	34	32	43
GMCL1	2	3	5	3	6	3	7
SF3B2	11	57	51	31	24	82	67
KLHL42	12	8	11	10	6	11	11
GNAS	20	1395	1211	998	906	1357	1396
DNM1L	12	53	34	28	28	27	30
PTHLH	12	0	1	0	0	0	0
PHACTR3	20	1	4	5	19	4	7
ERGIC2	12	43	41	36	32	45	42
TFAP2C	20	0	0	0	0	0	0
AURKA	20	20	26	13	14	21	19
CASS4	20	0	0	0	0	0	0
PIR	X	9	4	1	5	9	4
AAMDC	11	121	115	81	65	130	110
RFX2	19	1	2	1	1	4	3
METTL2A	17	22	16	17	10	12	26
SULT2B1	19	0	0	0	0	0	0
ALG6	1	0	2	0	5	2	5
CNOT3	19	11	14	8	10	15	22
GP6	19	0	0	0	0	0	0
PTPN4	2	7	5	6	7	16	11
DDX18	2	13	13	16	10	28	21
KHSRP	19	41	52	33	33	46	58
GNA11	19	33	31	24	17	40	39
ASAP3	1	26	17	19	13	34	30
EDEM2	20	4	8	7	7	10	12
DNMT3B	20	1	2	1	0	2	2
REM1	20	0	0	0	0	0	0
TPX2	20	23	20	16	15	13	16
FER1L4	20	0	0	0	0	0	2
PDRG1	20	36	32	13	23	25	26
EPB41L1	20	4	5	3	3	8	3
SLC15A1	13	0	0	0	0	0	0
DOCK9	13	1	4	0	0	8	5
ANKRD10	13	8	12	11	11	33	26
TGDS	13	4	6	3	4	4	9
DOCK3	3	5	0	1	1	1	1
C3orf18	3	12	11	8	18	29	20
COQ9	16	69	60	48	31	93	98
TMEM40	3	1	1	0	0	3	5
KIF9	3	7	9	5	6	2	7
ARHGAP28	18	3	1	3	1	6	5
CRLS1	20	160	130	123	126	121	156
DEFB127	20	0	0	0	0	0	0
PPP1R13B	14	16	20	15	16	41	33
ATRN	20	10	25	19	9	25	24
SMOX	20	0	0	0	0	2	1
SIGLEC1	20	0	0	0	0	0	0
FKBP1A	20	120	151	134	115	144	188
NSFL1C	20	49	49	40	36	49	66
SLC4A11	20	0	0	0	0	0	0
C20orf194	20	6	10	4	6	14	11
ZNF343	20	2	3	5	0	1	2
EBF4	20	9	12	4	4	12	18
CPXM1	20	2	1	0	0	4	8
MAVS	20	22	18	11	12	30	37
LZTS3	20	7	7	2	6	9	9
F11	4	0	0	0	0	0	0
XRN2	20	26	34	26	29	32	32
KIZ	20	6	7	4	1	16	13
DYNLL1	12	301	542	399	394	308	446
TESC	12	27	23	20	19	56	54
SNX5	20	37	46	27	28	62	50
RPL6	12	861	1026	671	711	821	1218
SIRPG	20	0	0	0	0	0	0
MAPKAPK5	12	19	13	12	13	17	14
P2RX7	12	0	1	0	1	0	1
ESF1	20	4	2	3	6	4	4
RBBP9	20	7	9	4	7	12	3
ANAPC5	12	31	38	24	30	42	62
SLC23A2	20	5	12	3	11	5	9
SLC8B1	12	2	1	0	1	1	1
TMEM230	20	93	81	55	70	96	80
DZANK1	20	0	2	0	0	0	0
KDM2B	12	8	16	3	10	14	13
CFAP61	20	0	0	0	0	0	0
LHX5	12	0	0	0	0	0	0
TASP1	20	1	4	2	3	3	1
OAS1	12	0	0	0	0	1	3
GCN1	12	15	16	11	10	38	25
RPLP0	12	1897	1758	1139	1301	2096	2791
PXN	12	31	29	18	16	28	46
SIRT4	12	1	2	5	2	3	4
RPH3A	12	0	0	0	0	0	0
KIF16B	20	5	1	2	3	2	4
TRMT6	20	4	6	4	0	10	6
CHGB	20	0	1	0	0	0	2
PEBP1	12	252	201	151	140	294	277
TBX5	12	30	43	19	23	42	50
BRAP	12	19	3	8	3	7	15
ERP29	12	90	69	38	59	85	104
NOS1	12	0	0	0	0	0	0
FUS	16	66	99	47	58	111	126
IGBP1	X	63	39	41	41	62	85
FXYD5	19	0	2	3	2	4	1
ZNF302	19	21	15	17	7	10	29
GRAMD1A	19	19	16	9	12	39	28
FXYD3	19	0	0	0	0	0	0
HEPH	X	200	242	180	160	179	181
CDIP1	16	24	39	26	24	45	54
CMTM1	16	5	1	1	1	5	2
KCNH4	17	0	0	0	0	0	0
GANAB	11	86	66	46	44	84	88
GMIP	19	0	0	0	0	1	2
RBM41	X	1	0	2	1	0	3
BIRC5	17	51	32	27	25	26	26
LAG3	12	0	0	0	0	0	0
MLF2	12	122	143	96	107	154	172
OTUB2	14	1	0	1	0	0	0
DDX24	14	81	91	84	68	108	145
ZBTB25	14	5	11	6	2	10	10
NECAP1	12	18	13	11	9	17	23
ARHGAP4	X	0	6	0	0	2	4
ANKRD24	19	0	0	0	0	0	0
DHX32	10	13	10	19	11	21	23
RCOR1	14	8	13	12	7	14	21
GPATCH2L	14	13	16	8	11	10	14
LTBP4	19	6	8	8	9	21	28
BLVRB	19	63	53	26	40	117	96
SLC9A1	1	5	4	4	2	4	3
SPTLC1	9	15	25	22	14	28	22
PAPOLA	14	77	96	71	68	77	118
CCNK	14	8	5	4	9	14	13
PCBP4	3	57	54	35	35	58	43
RGS1	1	0	0	0	0	0	0
YPEL3	16	17	53	30	30	49	52
MRPS33	7	29	45	26	27	35	38
NDUFB2	7	537	469	352	330	459	435
NUDC	1	76	88	43	45	81	86
MAEA	4	38	21	21	20	39	43
ICAM1	19	0	0	0	0	6	4
STRN4	19	24	51	39	32	43	54
IRAK3	12	0	0	1	0	0	0
LYZ	12	0	0	0	0	0	0
SI	3	0	0	0	0	0	0
MUL1	1	40	30	14	19	38	51
TFAP4	16	1	2	3	2	4	0
PDCD7	15	6	10	3	8	11	10
SPG21	15	21	36	27	36	34	59
FETUB	3	0	0	0	0	0	0
DNAJB11	3	45	37	29	36	48	43
P3H2	3	9	7	10	2	8	13
THPO	3	0	0	0	0	0	0
CHRD	3	0	0	0	0	0	0
FLT3LG	19	0	1	1	0	1	0
RAB11FIP3	16	25	21	14	12	31	24
GNPTG	16	12	20	12	8	20	19
ZNF268	12	5	4	1	2	3	2
GOLGA3	12	9	7	7	9	13	14
PABPC4	1	44	57	49	35	52	47
CD209	19	0	0	0	0	0	0
CERS4	19	19	19	7	17	20	15
MCOLN1	19	7	7	1	4	5	8
USP48	1	18	19	17	10	20	29
EFNB1	X	18	20	11	17	29	23
PDPR	16	11	6	7	6	25	20
AARS	16	24	34	14	26	72	72
GLG1	16	46	36	26	20	53	54
KIF4A	X	6	4	5	4	7	5
TNRC6A	16	9	8	12	6	13	18
PLEKHG2	19	8	6	4	2	10	4
DLL3	19	1	2	1	5	3	5
NAT14	19	30	34	15	15	57	52
PITPNM2	12	4	4	0	5	3	6
EXOC1	4	12	18	5	8	8	6
RBM27	5	10	12	6	11	15	11
POU4F3	5	0	0	0	0	0	0
OSBPL8	12	18	16	8	13	22	34
DTX2	7	3	1	2	3	2	1
NLRC4	2	0	0	0	0	0	0
PUS7	7	2	0	3	0	2	2
LAMB4	7	0	0	0	0	0	0
NRCAM	7	0	2	0	1	0	0
LAMB1	7	35	46	27	42	36	35
SLC26A4	7	0	0	0	0	0	2
SLC26A3	7	0	0	0	0	0	0
DLD	7	90	80	49	64	124	107
WDR7	18	6	8	6	4	5	2
TXNL1	18	71	77	64	52	82	103
IL5RA	3	0	0	0	0	0	0
ABCC6	16	0	0	0	0	0	1
CMTM6	3	9	11	6	8	13	18
ITGA6	2	1	1	1	0	1	1
RAPGEF4	2	11	17	9	7	10	12
MAP3K20	2	97	123	96	78	105	128
SMPX	X	658	915	676	622	551	679
FH	1	158	156	120	107	173	184
SEL1L3	4	3	1	0	0	3	2
TF	3	0	0	0	0	0	0
CDV3	3	71	62	35	64	64	84
MYO15A	17	0	0	1	0	0	0
ALKBH5	17	57	66	38	40	101	85
APOH	17	0	0	0	0	0	0
NLRP1	17	0	0	0	0	0	0
PITPNM3	17	0	0	0	0	3	1
SPAG7	17	78	115	97	69	104	104
ORC6	16	19	16	11	11	12	10
ZFHX4	8	3	3	2	4	5	11
SLC17A6	11	0	0	0	0	0	0
CPA1	7	3	0	0	6	0	0
ZC3HC1	7	16	19	11	18	17	17
ESR1	6	0	0	0	0	0	0
RGS17	6	1	0	0	1	3	2
ANGPT2	8	0	0	0	0	0	0
TMEM101	17	8	10	14	12	38	35
CD200	3	3	13	7	3	3	1
CCDC80	3	4	8	6	4	27	40
CMA1	14	0	0	0	0	0	0
PSME1	14	116	160	115	108	184	225
PPP2R3C	14	47	32	23	25	35	30
HAUS4	14	10	17	11	10	25	29
JPH4	14	0	0	0	0	0	0
MYH7	14	3456	3180	1882	1961	5400	4962
CEBPE	14	0	0	0	0	0	0
SLC7A8	14	3	1	1	0	1	1
OSGEP	14	10	9	8	11	14	11
SLC22A17	14	25	32	19	24	32	42
RNF31	14	11	10	4	11	23	19
SCFD1	14	75	21	31	39	26	28
G2E3	14	4	7	3	7	4	9
HECTD1	14	17	38	24	21	33	38
HNRNPC	14	239	274	162	158	272	366
RPGRIP1	14	0	0	0	1	0	0
SUPT16H	14	37	32	25	30	41	45
TOX4	14	39	31	20	22	41	38
GEMIN2	14	10	15	10	13	12	17
TGM1	14	0	1	0	0	0	0
TINF2	14	24	23	9	8	18	17
DAZL	3	0	0	0	0	0	0
TBL1Y	Y	0	3	0	0	0	0
SEMA6A	5	4	4	7	5	7	5
TRPM7	15	10	7	3	6	11	12
TYRO3	15	9	15	7	8	12	14
WDR76	15	12	8	6	7	14	12
CAPN3	15	1	7	1	1	4	0
SNAP23	15	35	32	18	15	33	18
TBX15	1	0	0	0	0	0	0
PHGDH	1	66	74	54	49	58	55
COL9A3	20	0	1	0	0	4	2
EZR	6	247	246	194	188	244	290
MYL6	12	1208	2150	1471	1368	824	1090
AGO1	1	8	4	3	6	9	6
TEKT2	1	0	0	0	0	2	2
CLSPN	1	2	6	0	2	2	1
RFFL	17	4	1	3	1	3	4
UNC13D	17	2	1	2	1	2	4
MFSD11	17	17	25	17	19	21	30
DPYSL2	8	10	13	12	9	20	20
TGFB2	1	7	17	6	5	15	12
GPATCH2	1	2	6	3	6	2	10
NUP50	22	13	13	7	7	13	10
CDC45	22	3	9	1	4	4	2
COMT	22	9	10	10	8	8	9
ADA2	22	0	0	0	0	0	0
AC016026.1	22	0	0	0	0	0	0
VNN3	6	0	0	0	0	0	0
ECHDC1	6	30	36	19	18	17	47
LRRFIP2	3	43	32	28	22	50	43
[truncated: 58,676 more rows]
