# Supplementary material
Source: HighWire-hosted journal article supplement (doi:10.1101/rna.079727.123)
Supplement: Supplementary_Table_8.xlsx [file Supplementary_Table_8.xlsx]

## Sheet: all
gene	statistic	pval	marker
BAD	-7.7969763113757	2.89956698409233e-12	significant
ZNF195	-1.36469698016639	0.219087530386588	non-significant
TMEM132A	-0.0411599128292222	0.971249144730399	non-significant
USH1C	-5.0851397788871	6.40647486814852e-05	significant
PIK3C2A	-1.45340278974132	0.18972822234275	non-significant
POLA2	0.0614758803739898	0.951882538754238	non-significant
CAPN1	-4.29735792308303	4.42627655839378e-05	significant
PHLDB1	0.929053918277261	0.360184509752204	non-significant
PRDM11	-1.03968177208902	0.343284947086384	non-significant
SYT13	-1.52778314788202	0.146294859828829	non-significant
MRE11	1.50718284016	0.233640021998577	non-significant
PLEKHB1	-6.58253848877825	0.00164072960728847	significant
RNH1	-4.37907733280153	2.76475446997315e-05	significant
NUP160	0.606930461379309	0.553365435142723	non-significant
GAB2	-3.91402675518836	0.00907674604663298	significant
USP2	0.726861510735847	0.471675952850739	non-significant
MED17	-0.288253261010009	0.775700444014251	non-significant
USP28	-0.58797367430128	0.558320702850095	non-significant
RSF1	-1.08017945607882	0.299045145562628	non-significant
RCN1	-2.25987814400565	0.0272908723158885	significant
DKK3	-6.07773180156919	4.3956031918079e-09	significant
TTC17	-2.35940910717	0.0471839753429162	significant
KCNQ1	-2.58282317465012	0.015420639542681	significant
FAM168A	-2.05736003865361	0.0617290086304239	non-significant
QSER1	-1.10724960827103	0.340696283714207	non-significant
SPA17	-1.25870071350595	0.251520923846781	non-significant
CDON	-3.97393079327233	0.0451862635637153	significant
MPPED2	-0.34872488682317	0.731371074430193	non-significant
RASGRP2	0.0268168748557599	0.97959077240689	non-significant
PPP2R5B	-0.231710606783285	0.825726117346091	non-significant
PYGM	-2.88864493951164	0.00736824696408722	significant
PHRF1	-0.454910753109338	0.662951271602955	non-significant
NUCB2	-2.33303048000131	0.0244756427886713	significant
MARK2	-0.731977583694838	0.476467122584232	non-significant
PICALM	-2.13139689042623	0.0368556905452489	significant
CLNS1A	-2.04483007308247	0.0481781002901699	significant
EED	-0.722871401293459	0.480288592329805	non-significant
TSG101	-4.97323500526019	5.82756349955046e-06	significant
ACAT1	-6.09917427899508	2.77601975134894e-08	significant
REXO2	-2.52036178181906	0.0155585211707726	significant
RBM7	-0.879659762751738	0.389725503249789	non-significant
FAM76B	0.224049314260488	0.831590518308906	non-significant
POLD3	-0.705173683795324	0.49549220148564	non-significant
ACER3	-3.77483799044711	0.147707050436185	non-significant
TOLLIP	-1.10363069185399	0.276645473125301	non-significant
IGSF9B	-1.18161998165049	0.2650573616958	non-significant
GSTP1	-9.21459977332912	1.80005319445826e-18	significant
APLP2	-3.77743662409407	0.00019307443214498	significant
CD59	-6.40092764560407	5.73006371063955e-10	significant
CD82	0.132448262836413	0.906358170765134	non-significant
CTTN	-0.239685475491267	0.812338234387696	non-significant
FOLH1	0.151013042754559	0.89580345660257	non-significant
ZW10	-0.306646062072287	0.773746815926795	non-significant
ALG9	-12.4952990937746	2.88787030307039e-10	significant
MTMR2	-2.9032392460169	0.0118904825457519	significant
SF3B2	-1.27262037739672	0.209079770766002	non-significant
AAMDC	-1.19083485617025	0.235925660034002	non-significant
GANAB	-2.79244624326566	0.00648322988535828	significant
ARCN1	-2.59355289077682	0.0129201908431902	significant
RASSF7	-1.48353735872982	0.16538995125357	non-significant
CRYAB	-27.0001563394879	7.61337917130054e-141	significant
HTATIP2	-0.554470215847724	0.658971847970799	non-significant
CTSC	-2.37461887640272	0.0313834057448941	significant
CCDC34	-3.47509734796219	0.0011811966614961	significant
ELP4	0.681520949578041	0.529435168019374	non-significant
ZPR1	-2.36658622514822	0.0294875333052635	significant
MTCH2	-2.79581622589866	0.00606323445869788	significant
FNBP4	-0.215498688689807	0.833119944926483	non-significant
SC5D	-2.94038786849654	0.00536332441113584	significant
HSPA8	-9.6344469977713	1.47590134299907e-20	significant
VWA5A	-2.49960125863411	0.040215811683069	significant
DNAJC4	-4.1252687869782	0.000125278100075524	significant
SIAE	0.753509741640205	0.479066379083697	non-significant
SNX15	-2.84381714215635	0.00999867816577537	significant
ATG2A	0.584003683565833	0.577700107914251	non-significant
EHD1	-2.62866639204702	0.0130442534332718	significant
OSBP	-2.20446090884678	0.0650721249366514	non-significant
PUS3	-1.42535833710381	0.181389756860749	non-significant
DCPS	0.524617253385181	0.610364948292174	non-significant
KMT5B	-1.63550529234966	0.122358621726725	non-significant
FOXRED1	-0.493470410096361	0.643604485501149	non-significant
PPP6R3	-1.98499322956292	0.0642224202461012	non-significant
ST3GAL4	-2.70237890453537	0.00978464874738264	significant
CCND1	1.33175645780918	0.190067496403224	non-significant
CCDC86	0.0781728365217917	0.940800730541075	non-significant
PRPF19	1.09796365229689	0.280152729494798	non-significant
TMEM109	-3.26787893965503	0.0019724043992132	significant
CHORDC1	-3.74210872698297	0.00369195706070383	significant
ANAPC15	-1.50254977578619	0.144570111302891	non-significant
PANX1	0.385568650955677	0.722859022006774	non-significant
ARHGEF17	-2.74054271569274	0.00903421844418581	significant
EIF4G2	-7.83780952702391	2.87589968092336e-14	significant
GALNT18	0.076649382176569	0.944297624530032	non-significant
BIRC2	-0.486333847669617	0.631640849824764	non-significant
UBE4A	-1.07798193782737	0.29818192654684	non-significant
DDX6	0.168833537553703	0.866569949235171	non-significant
CBL	-0.51152702885068	0.657013027977976	non-significant
NECTIN1	-1.20822563851331	0.239787456232445	non-significant
HIPK3	-1.34245108702551	0.182690359081062	non-significant
FBXO3	-1.30281568735234	0.19959560813133	non-significant
PDHX	-4.38327791170623	9.79462299037177e-05	significant
COMMD9	-2.00479516590679	0.057839960145086	non-significant
MDK	-14.626313565365	9.55941453906078e-45	significant
AMBRA1	-3.05459947925256	0.00240677672980537	significant
MADD	-0.350056957229425	0.779142130448273	non-significant
PTPMT1	-2.30940840681573	0.0247955273265897	significant
NAA40	-1.09490542169901	0.29319910244078	non-significant
SLC22A18	-6.97945107471393	0.000136740979372358	significant
CD81	-7.91572371136312	1.8885625300637e-14	significant
C11orf58	-5.52769375245885	9.9922446400929e-08	significant
PITPNM1	0.318212432146291	0.770115206895786	non-significant
RPS13	-17.1163527451668	7.59431465756196e-61	significant
AIP	-3.66333226896648	0.000677810837986195	significant
NUP98	0.0536138646646777	0.957950379699237	non-significant
NDUFS8	-8.23813531880464	2.65111499427589e-14	significant
GTF2H1	-3.48885742176709	0.00165589399620149	significant
CTSD	-4.0256392766491	8.86034917210978e-05	significant
IFT46	-1.80245254715785	0.0856662718462418	non-significant
APOA1	-1.8848348921363	0.0783151379141093	non-significant
RPS25	-8.45925540160147	1.49664330999276e-16	significant
SPCS2	-3.99002635610867	0.000147164741766007	significant
USP35	0.647958012673902	0.599697565870229	non-significant
SNX19	-1.99927750992372	0.0576240609198473	non-significant
KCNJ5	0.129889990672009	0.897135048883853	non-significant
MAPK8IP1	-1.20481581955061	0.31050297521354	non-significant
CRY2	-0.895861793446553	0.38143889181039	non-significant
PEX16	-0.0321008060895062	0.975741730492412	non-significant
CAT	-1.07004994570207	0.302340355518897	non-significant
KBTBD4	-5.56559294990521	1.95955095883366e-05	significant
AHNAK	-3.66196555136795	0.000298602248462463	significant
FRMD8	0.571972676155432	0.5827203638519	non-significant
PRDX5	-10.4122799699072	8.23837705472177e-22	significant
COPB1	-5.73172609524243	1.16620393330036e-06	significant
PSMA1	-7.81109211092922	1.17428540251434e-11	significant
SERGEF	-2.57191347926957	0.0281726172263838	significant
CSRP3	-21.6429921319587	4.28904533331677e-94	significant
E2F8	-1.82788417451173	0.0996623275945219	non-significant
CDKN1C	-2.86761092936909	0.00767208675363092	significant
STK33	-0.67521817656442	0.522688569358276	non-significant
H19	-10.1940893822408	1.38875517747018e-22	significant
PPFIA1	-0.764656656648092	0.504063906647072	non-significant
TRIM21	-2.52663174465664	0.0664294770583494	non-significant
ARFIP2	-0.73958051963468	0.472349630910711	non-significant
TRIM5	-0.910280748055379	0.449555718967312	non-significant
RRP8	-2.11644008596676	0.0566993194816623	non-significant
TIMM10B	0.598856571322831	0.571021633149269	non-significant
IGHMBP2	-0.494494836721225	0.654902539625782	non-significant
MACROD1	-1.6056520479594	0.116024111527895	non-significant
WDR74	-1.03833626430745	0.314204573935943	non-significant
RTN3	-5.28958824901876	3.46209019556962e-07	significant
SWAP70	-0.261953954313822	0.800945803518421	non-significant
SBF2	-1.47672167938495	0.165503813979643	non-significant
MICAL2	-1.05925656862453	0.296137782501322	non-significant
RRAS2	-2.40348344914526	0.0224131797062837	significant
DPF2	-3.35957623939673	0.0020830841602133	significant
LDHA	-11.9306005772368	4.79946070369059e-26	significant
MYBPC3	-1.15318959202807	0.249283604662768	non-significant
DDB2	-3.17191819083135	0.193309849050806	non-significant
ACP2	-1.15607556279477	0.265137723633074	non-significant
TIMM10	0.157513385057762	0.875566447113668	non-significant
FADS2	-3.41056419362363	0.000948949545419092	significant
TMEM258	-2.71583156980185	0.00723369319032231	significant
STT3A	-1.32431238926344	0.197425516596092	non-significant
ADAMTS8	-1.94948225579896	0.0662005826572292	non-significant
PHF21A	-1.89028885030972	0.0683975557275227	non-significant
NAT10	-0.475029831074881	0.648483863786385	non-significant
CAPRIN1	-4.88125639026159	3.67831792541637e-06	significant
FCHSD2	-0.153192368098107	0.880651049010072	non-significant
ARRB1	1.75804607126576	0.269641810886927	non-significant
THAP12	-0.291960449811005	0.774924438647092	non-significant
NUMA1	-0.42205944987635	0.674473692319882	non-significant
CCDC90B	-1.3660543109639	0.188752132562815	non-significant
SYTL2	-0.0935344536797059	0.928776486017772	non-significant
RAB30	0.469646433968173	0.659014949213037	non-significant
CREBZF	-0.452417493769923	0.659076642110951	non-significant
PRCP	-3.39771918236647	0.00174329751476023	significant
NARS2	-0.571645231300648	0.607443257304147	non-significant
RNF121	0.710215807741373	0.486483078773793	non-significant
BUD13	-0.869968063048206	0.418654391902906	non-significant
DCUN1D5	-2.0390589301369	0.0477488152305029	significant
YAP1	-1.63350799374846	0.109577424780863	non-significant
SLC37A4	-0.907651260006642	0.415870911587061	non-significant
RDX	-3.40782282983004	0.0012318877541773	significant
FDX1	-2.56627223791376	0.0159003227932168	significant
C11orf1	-3.98080560876232	0.000356213865236832	significant
FXYD6	-6.69896606288376	1.74501031910695e-10	significant
SIRT3	-3.05115415428548	0.00760470705698143	significant
IFITM3	-4.14399448633947	8.62958781171847e-05	significant
SCYL1	1.49920784679411	0.145772028472309	non-significant
CDCA5	-4.34429880503692	0.0173251284939495	significant
BTBD10	-2.19905692994908	0.0415824891367857	significant
ADM	-2.90991165573332	0.0351744932023137	significant
LIN7C	-0.476302452476793	0.656205416430638	non-significant
IMMP1L	-1.32367767819527	0.195575305068139	non-significant
TUT1	1.49002805094336	0.173320049066581	non-significant
HSD17B12	-7.86550191320776	3.2268059447725e-08	significant
APIP	-1.81098824865801	0.131479969150715	non-significant
DGKZ	-0.870829180172731	0.39311673341981	non-significant
EIF3M	-9.06858325310479	3.27433311772114e-17	significant
TNKS1BP1	-1.28476819020223	0.239119684234253	non-significant
SSRP1	-3.35952114465554	0.00184795492842784	significant
PTPRJ	0.113545313036309	0.914146674900358	non-significant
ARFGAP2	-2.56205372548474	0.016435613871999	significant
CELF1	0.126829018226817	0.900179370068338	non-significant
HIKESHI	-8.14056359920976	6.23893912161874e-12	significant
SESN3	-0.878324142937666	0.410100206206633	non-significant
ENDOD1	27.3413570622245	0.00256822631543878	significant
CCDC82	0.305055826116985	0.78209184539248	non-significant
SERPINH1	-0.887500171034764	0.376086773235875	non-significant
INTS4	-0.859697075684767	0.404471488560254	non-significant
RPS3	-25.9899743817301	6.91226100705317e-122	significant
ZC3H12C	0.414400600617326	0.700342717249229	non-significant
TTC12	-7.53850283024045	0.0638530117868947	non-significant
NCAM1	-1.60173793878726	0.111214084986076	non-significant
ATM	-0.788845567607848	0.473030233769053	non-significant
AASDHPPT	-3.42548748998975	0.00120797941633025	significant
LAMTOR1	-1.94850015916834	0.054927320521976	non-significant
HYOU1	-2.34190389124626	0.030200582279921	significant
MTA2	-0.707445520853204	0.514449463773196	non-significant
TMEM138	-0.681455710877262	0.561514796038046	non-significant
FADS1	-0.853354521297806	0.397759934210396	non-significant
CPSF7	-0.235535134476357	0.816321520286608	non-significant
B3GAT3	-0.08851922510484	0.931112032192645	non-significant
EI24	-2.18396453516073	0.0339325131203728	significant
CHEK1	-1.10936444818402	0.329465733643683	non-significant
FEZ1	-1.71078218180398	0.100672429558048	non-significant
SCN2B	-1.16567968401561	0.312409314957127	non-significant
SIDT2	-0.863206275233178	0.514403809445494	non-significant
TMEM25	1.41614832202495	0.193817096617927	non-significant
TAGLN	-10.6775866996542	1.69395438227951e-23	significant
TRPT1	-3.90802102461742	0.000263595076160398	significant
NUDT22	-1.23172420887287	0.229685918257368	non-significant
MRPL49	-5.03509438578116	1.53581631378486e-05	significant
FAU	-1.43034555735273	0.152911850125606	non-significant
TM7SF2	0.470531733225609	0.64457373936467	non-significant
VPS51	-3.81432596239908	0.000291742189713621	significant
CWC15	-3.09475329581322	0.00269430782167174	significant
TMEM218	-1.06381890907717	0.316287739474254	non-significant
PRSS23	0.155521449496954	0.878926944520103	non-significant
DIXDC1	-2.90452767409663	0.00633746546256875	significant
DLAT	-1.57564787486436	0.119054788022777	non-significant
NKAPD1	-2.59319982059349	0.0169780891010248	significant
TIMM8B	-3.07565549412188	0.00264331531797347	significant
PTS	-5.20276101006867	8.76961097098559e-05	significant
UEVLD	-3.74254872561942	0.0181684633618582	significant
EXT2	-0.965384931949395	0.345822602936673	non-significant
NDUFC2	-9.0097998388312	6.80134036214484e-17	significant
ME3	-1.66165945041499	0.238138130968946	non-significant
ACAD8	-1.28067800823782	0.220153375267772	non-significant
THYN1	-2.86098329081752	0.00677747972488808	significant
VPS26B	-1.37215989107795	0.176916032802805	non-significant
NCAPD3	-1.19234541377277	0.28404374494035	non-significant
ARL14EP	-0.287227939893312	0.777092357738252	non-significant
PDE3B	-1.31923941621544	0.274813910515814	non-significant
GUCY1A2	-0.646796762950506	0.531687203396584	non-significant
TMEM123	-1.44840420809995	0.152647906878235	non-significant
TBCEL	-0.838610124263502	0.421281514437743	non-significant
TBRG1	0.353399585815303	0.731152507021361	non-significant
UBE2L6	-3.09688627263548	0.00356738128239483	significant
ZDHHC5	-1.8067811926673	0.175445068741868	non-significant
MED19	-2.31293059424334	0.0291390905113991	significant
TSPAN18	-2.31023359275593	0.0262860487148813	significant
MRPL17	-1.20273726474064	0.233198384189432	non-significant
EMSY	-1.13285895496768	0.363976749514828	non-significant
ALG8	-1.65112466206254	0.120345937675764	non-significant
SIK3	-1.69223151240038	0.105780247491237	non-significant
PCSK7	-2.49910913430873	0.0200878371209964	significant
VPS11	-0.395646319372935	0.698188643604695	non-significant
NLRX1	-3.10370561089998	0.0193618168744878	significant
NEU3	-0.958472482451478	0.362884188712838	non-significant
CYB561A3	-1.34336379810986	0.217796024286942	non-significant
UBXN1	-2.31111700109172	0.0236617234640473	significant
TAF6L	0.0826002970795288	0.935572075469502	non-significant
NXF1	-0.259800481789329	0.798132093525133	non-significant
STX5	-0.458725929930399	0.653098121735812	non-significant
SLC25A45	0.155287052182658	0.893694308540448	non-significant
SYVN1	0.500594148959612	0.616769355021916	non-significant
ZFPL1	0.46290610661608	0.66924498690093	non-significant
RPS6KA4	-1.74154991036289	0.132820475168416	non-significant
LRP5	-0.951893063717546	0.356293346097129	non-significant
INPPL1	-2.98500072567109	0.00490479133434947	significant
PCF11	-2.35505831820131	0.0340234198044912	significant
RPUSD4	-2.07244604221778	0.0672393310068046	non-significant
ARHGAP42	-1.58026785920154	0.244535769427151	non-significant
PACSIN3	2.03166705324203	0.0467281192184416	significant
SLC39A13	-1.8361591528879	0.0773286684565143	non-significant
PSMC3	-1.21110276134676	0.228213736654841	non-significant
NELL1	-1.51360222932544	0.249854748604679	non-significant
SMCO4	-0.856394674380707	0.548682863754138	non-significant
TAF1D	-0.296101333472151	0.770350927273836	non-significant
ABTB2	-1.03680074862861	0.350826785595981	non-significant
AMOTL1	-1.75792538349912	0.104595695078434	non-significant
CEP57	-3.4419460024342	0.00244174338642779	significant
JAM3	0.0632872628649147	0.955997529966732	non-significant
ADAMTS15	1.29907355862462	0.224953782785247	non-significant
API5	-1.81716245816132	0.0793306927481256	non-significant
ALKBH3	-1.09509809400799	0.318097334956242	non-significant
CUL5	0.0488567712225981	0.96249308145751	non-significant
SMPD1	-2.1023030640346	0.0433647436885838	significant
APBB1	-2.17439173599413	0.0335448259908597	significant
TRIM44	-3.16379605735056	0.0039117981346525	significant
ILK	-3.3646066755712	0.000959516047860883	significant
TAF10	-5.50876001814464	1.57918439767363e-07	significant
DCHS1	-0.294059715202925	0.773012556220623	non-significant
TUB	-0.429919340272914	0.690068433603791	non-significant
RNF169	-0.904171888293993	0.391912910809662	non-significant
RPL27A	-15.525475408133	3.4591158348534e-51	significant
AKIP1	-1.58267532466645	0.124787018937048	non-significant
TMEM41B	-2.08139027576259	0.0504592723913449	non-significant
ZNF143	-1.09500378105276	0.320392256265634	non-significant
WEE1	-2.05271734315957	0.0424262678279371	significant
TMEM135	-2.44281191800413	0.246021260973117	non-significant
PLEKHA7	-2.94590411830083	0.00327707047567601	significant
NAV2	-1.52219934269988	0.146610259230086	non-significant
PATL1	-0.396635266283484	0.702320167059738	non-significant
STX3	-4.73323275296788	0.0144423079084505	significant
MRPL16	-2.50947633495233	0.0175701103658998	significant
IGF2	-0.358936981071861	0.721593722961367	non-significant
RNF214	-2.17272116194037	0.0966841682258682	non-significant
ATP5MG	-10.3541622411358	1.98836027808476e-23	significant
STIM1	-0.946547292936336	0.355360232948365	non-significant
RRM1	-3.53786983305105	0.000740136874213785	significant
OTUB1	-0.985002000328153	0.327792852154298	non-significant
RCOR2	1.24103312292359	0.399284005154585	non-significant
NDUFV1	-7.74631043506365	1.5591226622256e-12	significant
CDK2AP2	-1.6305038045034	0.112697516869723	non-significant
NUDT8	-3.76291527918273	0.00509578217943829	significant
SDHAF2	-0.160191796619455	0.873389290733412	non-significant
DDB1	-7.06203178026941	7.4477464789131e-11	significant
VPS37C	-2.68322903236556	0.0183810559709862	significant
FTH1	-28.5456623115113	5.19482253428545e-145	significant
BSCL2	-1.78240348527027	0.103100359217554	non-significant
POLR2G	-3.64449464920664	0.000471601087256475	significant
SLC3A2	-1.03263031154033	0.310108118675957	non-significant
SPINDOC	-3.51060542089261	0.00278075946150588	significant
FADD	-0.941390797957796	0.361520713778446	non-significant
LTBP3	-2.00666290979246	0.0576108189707902	non-significant
SAC3D1	-0.759522806515386	0.454680628836131	non-significant
SF1	-2.7234083307365	0.00796244139115081	significant
PAFAH1B2	-1.48834267929322	0.147611746942574	non-significant
STIP1	-4.00772094185994	0.000112281442710292	significant
FEN1	-1.60315606210557	0.12145577042807	non-significant
TMEM223	-5.0033576657008	8.84075235026276e-06	significant
ANKRD49	-14.0471633654168	6.50836008319436e-07	significant
METTL15	-0.728629313327774	0.481015789973395	non-significant
SIK2	-0.769634552088736	0.461770983846785	non-significant
USP47	-2.58501712714365	0.0134868871822765	significant
HSPB2	-5.74619819038917	3.96039300298887e-08	significant
NFRKB	0.289207912806456	0.78066166585653	non-significant
SYT9	0.815215364215139	0.445442969249149	non-significant
MSANTD4	-3.06576861606485	0.0355305100077408	significant
DNAJC24	-2.63671084673794	0.0190628616727808	significant
CAVIN3	-3.2463634544816	0.00209469561355194	significant
PDGFD	-1.29062836133977	0.205912172743456	non-significant
C11orf24	0.151971823558225	0.889812785736986	non-significant
TMEM126A	-5.57009704035418	1.01714241348771e-06	significant
TMEM126B	-6.10002382036181	2.99371846998918e-08	significant
MAP6	-0.692347159942842	0.508313580351649	non-significant
ANO5	-2.39284671048869	0.0273054973019332	significant
HINFP	-0.478345174462668	0.650797072291939	non-significant
CLP1	0.302209707501983	0.776728643095643	non-significant
FIBP	-2.27990495424209	0.0269452244653254	significant
PPP1CA	-4.83907475606116	3.72589262016001e-06	significant
RAD9A	-0.000466513980604443	0.99966171647129	non-significant
EFEMP2	-3.79619925361382	0.000207184711488837	significant
TMEM134	-5.32835777111092	2.04591493415221e-06	significant
CORO1B	0.379301528080647	0.71953528865741	non-significant
MUS81	-1.53779033754018	0.139033694715926	non-significant
CFL1	-20.1937859711974	1.69501563503875e-74	significant
SSH3	-0.191002042805206	0.854192970953596	non-significant
NADSYN1	-0.732784869403583	0.511910405785048	non-significant
DHCR7	-1.1288654804955	0.29727194627454	non-significant
RNASEH2C	-0.595857881632519	0.554511494394131	non-significant
ANKRD13D	-2.64109412648888	0.0775812795863078	non-significant
KAT5	0.900729759609215	0.376541086783711	non-significant
GRK2	-2.15516138685987	0.0401773436873716	significant
RELA	-2.54743072859541	0.0153654406309692	significant
TRMT112	-5.24348609655341	7.47215382589068e-07	significant
KDM2A	-0.198599550076695	0.844434447581134	non-significant
ESRRA	-3.6661348241955	0.000489810505792405	significant
RHOD	-2.35383127654783	0.0255738983534529	significant
GPR137	-0.80276560504226	0.429554797650235	non-significant
MAP3K11	0.74957188081444	0.484721297070464	non-significant
EHBP1L1	-0.821333948806965	0.468381482664799	non-significant
RNF26	-1.65939523290599	0.119783848992244	non-significant
PPP1R14B	-3.23208140919888	0.00162923245866669	significant
FKBP2	-0.832594054240747	0.407585675486499	non-significant
VEGFB	-4.548164789284	1.32819794469882e-05	significant
LRFN4	-0.966904265620766	0.404475602103768	non-significant
RCE1	-0.519594849087633	0.618254456339019	non-significant
C11orf80	-0.516177076704421	0.685229896364453	non-significant
RBM4B	-0.639372404269695	0.540479150616842	non-significant
RBM4	-3.56144088759323	0.000590164763575066	significant
CCS	-0.430439469987309	0.671684615318282	non-significant
CTSF	-4.19036966104448	0.000694267872827031	significant
ZNHIT2	-2.42993155763518	0.0612201545864712	non-significant
BBS1	-1.66521704394173	0.171221379108831	non-significant
MRPL11	-4.69553763988811	1.77327331672902e-05	significant
SLC29A2	-2.43577885678097	0.0494489686686308	significant
B4GAT1	-2.11068638513938	0.0429558540640065	significant
BRMS1	-2.48712069415617	0.018804887808092	significant
HRAS	-2.06286376403656	0.0465831909106675	significant
YIF1A	-3.0544887778107	0.00482953379643704	significant
RAB1B	-5.66251362199761	1.01478858827348e-07	significant
PTDSS2	-2.98969107277623	0.0079066000860293	significant
KLC2	-1.63654448017704	0.131988769420827	non-significant
TRAF6	-1.91968472435351	0.0870755186641153	non-significant
PACS1	0.598282164097234	0.551994208602266	non-significant
ZNF408	-0.856214345847976	0.460559060801597	non-significant
CKAP5	-0.933165528843557	0.357086231439826	non-significant
ARHGAP1	-3.11982883277786	0.00296023625115414	significant
ATG13	-2.24693916245278	0.0386936532490792	significant
GAL3ST3	-2.23839155459895	0.0975606115507718	non-significant
TP53I11	-1.77747961203574	0.0857432636877257	non-significant
BANF1	-8.26003567898386	6.58295161980279e-15	significant
TMEM9B	-0.775317354356872	0.44445667839828	non-significant
EIF1AD	-1.56736103781273	0.137915970723555	non-significant
EIF3F	-4.74939567425229	5.43048710068667e-06	significant
SART1	-0.383312413061648	0.703658382506682	non-significant
POLD4	-2.42583483566003	0.0277040801157369	significant
LIPT2	-0.00784037453046487	0.994943449173339	non-significant
DRAP1	-2.71693960356726	0.00765141641737199	significant
UCP2	1.33422116500346	0.311384813733296	non-significant
C11orf68	-4.44061735705312	5.62872597042259e-05	significant
PAAF1	-1.98806136553754	0.0777598183816658	non-significant
MRPL48	-1.96659988223867	0.0734499711083021	non-significant
RAB6A	-2.77090625395433	0.00701768566767774	significant
CCDC85B	-2.69763233195784	0.0145115144019027	significant
RPS6KB2	-0.426176014078442	0.672992250448327	non-significant
CSTF3	-1.06997721954264	0.307525332787854	non-significant
COX8A	-12.0170525244395	1.80005330260029e-29	significant
RPL37AP8	0.605250621010172	0.601914176400048	non-significant
FAM89B	-3.90353237642138	0.000208031337970743	significant
DEAF1	-0.0559489656852105	0.955729365224939	non-significant
TMEM80	-1.86777429778645	0.0858532337005674	non-significant
ZDHHC13	-1.29293880117201	0.225198134404392	non-significant
SCN4B	1.00515487016364	0.354658650170506	non-significant
RHOG	-2.7790304374354	0.015212552208225	significant
TALDO1	-1.85724175317837	0.0671314183462411	non-significant
GATD1	-1.44443596494387	0.246877104144225	non-significant
RPLP2	-8.09705875805003	1.25793698778364e-15	significant
PNPLA2	-2.0664894534915	0.0475936128623904	significant
CD151	-10.2598766865148	4.34828775200889e-21	significant
POLR2L	-8.25443105851508	1.06253582434982e-15	significant
CHID1	-1.14611669200749	0.256157966780818	non-significant
BET1L	-1.58989982152669	0.134197771901794	non-significant
RIC8A	-1.60958189718673	0.11453657056262	non-significant
DDX10	-2.04875756087263	0.0891298010280187	non-significant
SPTY2D1	-0.254847174597907	0.817645383308519	non-significant
LDLRAD3	-3.00347060758546	0.0941997726507867	non-significant
SLC35C1	-0.436366594139067	0.670533779243374	non-significant
COA4	-2.58870436609175	0.0148100359356452	significant
MOB2	-1.95155069474918	0.0597223858445789	non-significant
KCNA4	-1.41168333972177	0.183862800299919	non-significant
KBTBD3	-2.40552948052168	0.0575315130918459	non-significant
C11orf54	-3.6026248186829	0.00369095000575717	significant
SRPRA	-3.94209695934587	0.000434906201504506	significant
CADM1	-1.18811876545882	0.242528358739074	non-significant
AP2A2	-1.62272330951071	0.114221262982043	non-significant
FANCF	-0.661507616842013	0.51874632458549	non-significant
WT1-AS	-0.374557978120834	0.730283928529282	non-significant
DENND5A	-4.13878359465373	6.8252744612404e-05	significant
TSSC4	-2.45158182580277	0.0212256596563165	significant
MAML2	-0.532241458703093	0.649349746422042	non-significant
DUSP8	-1.41458026561078	0.18001994861181	non-significant
WT1	-2.92767782376605	0.00574364171058418	significant
INTS5	-0.82577945387499	0.424389816175355	non-significant
IFITM2	-3.46627763326423	0.00166686206084148	significant
PRMT3	0.0275825282369818	0.981663617204902	non-significant
TMEM179B	-2.32250595618233	0.0280350617189279	significant
PSMD13	0.509775518839097	0.61143617147517	non-significant
BCL9L	-0.143810551175112	0.888772369332089	non-significant
BACE1	-1.51859419336179	0.15780929138378	non-significant
ARAP1	-0.160519764142639	0.873051540171569	non-significant
ZFP91	-0.799075402602833	0.43231241481402	non-significant
TEAD1	0.190498567432949	0.84981733447114	non-significant
KCTD21	0.111119419408933	0.917920142440252	non-significant
FAM111B	-0.465646476212628	0.651154067348194	non-significant
ZBTB44	-1.39613445802294	0.188146014214604	non-significant
TRAPPC4	-1.00565293489826	0.321956361973682	non-significant
ARHGEF12	-2.15664509384208	0.0371951032450292	significant
PCNX3	-0.0511335755915418	0.960684573749653	non-significant
MRPL21	-2.96624406092562	0.00398411465646389	significant
BCO2	-3.11282692259625	0.00526546890174703	significant
FAR1	-1.59846771358462	0.132792546936253	non-significant
PARVA	-2.78677641231361	0.00689756512418118	significant
FAM118B	-2.47780907374117	0.024797434538407	significant
SVIP	-1.83570435593973	0.0779691430033005	non-significant
HYLS1	-3.42680987162574	0.00754754989816217	significant
UVRAG	0.0124011384516363	0.990344838905077	non-significant
CTNND1	-3.28546650266664	0.00147530136992369	significant
CTR9	-0.900941353798653	0.381516262606181	non-significant
SDHD	-6.34984477375899	1.97925208411788e-09	significant
UQCC3	-1.32871260559028	0.204386262178823	non-significant
LGR4	-1.64853005186347	0.101188765079103	non-significant
IPO7	-4.75449271505554	9.07681348022236e-06	significant
NAP1L4	-3.27451862951944	0.00133843824348231	significant
SELENOH	-1.86742419938359	0.0662227011538345	non-significant
SIPA1	1.28882702265842	0.254188742424573	non-significant
ARL2	-7.28975509480263	8.81542334832191e-10	significant
TMX2	-2.15870845418959	0.0348870704576189	significant
NDUFS3	-4.51587079685149	1.05639604055851e-05	significant
MRPL23	0.845887804939912	0.402259234171009	non-significant
TSPAN4	-0.0753479624271009	0.940371754855453	non-significant
PPME1	-1.21236553993075	0.251712639247514	non-significant
STARD10	0.177172186155904	0.860628196289903	non-significant
HNRNPUL2	-0.690910768733012	0.492698872396759	non-significant
FADS3	-2.35802653945364	0.0232525444680836	significant
RPS28P7	-7.18977322116195	2.42532567560235e-12	significant
SRP14P2	0.83244157270159	0.443986018046565	non-significant
FABP5P7	-0.318677053249127	0.799127027307371	non-significant
RPL26P30	-1.2975258063267	0.286634972268951	non-significant
ZBED5	-4.29930569275982	8.26239002477564e-05	significant
RBM14	0.327018337417599	0.747659412868332	non-significant
RPL37P2	-0.768769669710752	0.44764297481097	non-significant
BDNF-AS	-0.00592044150588978	0.995563149607058	non-significant
ZBED5-AS1	-0.553271893579137	0.596952333109868	non-significant
RBM14-RBM4	-3.33876987744937	0.00117651307352444	significant
MALAT1	-1.60694114631975	0.122615575919112	non-significant
NAV2-AS2	-2.45320861320273	0.0217653920095779	significant
AP5B1	0.568365636205823	0.625722499114636	non-significant
EEF1G	-27.2193287814559	2.57747409669058e-140	significant
DPP3	-0.0653682304978579	0.952687621879671	non-significant
FXYD6-FXYD2	-6.78493230734105	1.03487393751904e-10	significant
MIR100HG	0.27527811367911	0.785385047302103	non-significant
SNHG1	0.365285456358399	0.720189957445541	non-significant
HMBS	-1.58854086409732	0.160187303998468	non-significant
SPON1	-3.47299638040295	0.000699536003581066	significant
SRSF8	-3.60980882305136	0.00453292714113013	significant
C11orf98	-2.51276141555537	0.0170686690315773	significant
GSEC	-1.21304732657507	0.308662294586332	non-significant

## Sheet: no_decision
gene	statistic	pval	marker
BAD	-0.0579981090257837	0.954018952296732	non-significant
ZNF195	-0.837583848745442	0.430258770202933	non-significant
USH1C	-2.33932962416042	0.0843021450061581	non-significant
POLA2	0.868248654710307	0.401940392837672	non-significant
CAPN1	-1.37371621704255	0.176382220003996	non-significant
PHLDB1	1.48258835519163	0.150588601474886	non-significant
PRDM11	0.306365810935555	0.777320538268884	non-significant
SYT13	0.399774666187511	0.720989729613955	non-significant
MRE11	1.50718284016	0.233640021998577	non-significant
RNH1	-0.482686249749582	0.631359266490701	non-significant
NUP160	3.37961420207581	0.0190373591570104	significant
USP2	2.47201968622052	0.0247795150956129	significant
MED17	0.298370518510379	0.768526470075409	non-significant
USP28	0.854539368076943	0.396918663045061	non-significant
RSF1	-0.742778832050877	0.473875406753566	non-significant
RCN1	0.761985758282029	0.452290915075136	non-significant
DKK3	1.85046194386253	0.0686211835512329	non-significant
TTC17	-1.72524966247967	0.124926415851674	non-significant
KCNQ1	-0.39992863462709	0.692163480531776	non-significant
FAM168A	-1.07544258471327	0.300412624730432	non-significant
QSER1	-0.595537845495694	0.584002000964948	non-significant
SPA17	0.122233895666702	0.907278486605462	non-significant
CDON	-3.43764479081562	0.0490560866609552	significant
MPPED2	2.28359499370923	0.0353096951445251	significant
RASGRP2	1.01411849205837	0.376957653769357	non-significant
PPP2R5B	0.204396955306328	0.851037138752438	non-significant
PYGM	-1.31701469317999	0.203177024953854	non-significant
PHRF1	-0.454910753109338	0.662951271602955	non-significant
NUCB2	-0.664424359434954	0.510329234090766	non-significant
MARK2	-0.470673987100962	0.645951531974696	non-significant
PICALM	0.436671102171441	0.665177289397915	non-significant
CLNS1A	0.112492338365754	0.911409423250299	non-significant
EED	0.215277922305786	0.833470971845101	non-significant
TSG101	-0.256984733217594	0.800112842961478	non-significant
ACAT1	-0.511434164460444	0.611784373443874	non-significant
REXO2	1.70640042163627	0.111033139418667	non-significant
RBM7	1.21752709137191	0.249152030752261	non-significant
FAM76B	0.224049314260488	0.831590518308906	non-significant
POLD3	-0.16573671669684	0.873679364029353	non-significant
ACER3	-3.77483799044711	0.147707050436185	non-significant
TOLLIP	0.866099322046188	0.396509357247636	non-significant
IGSF9B	-1.18161998165049	0.2650573616958	non-significant
GSTP1	0.0673726252656097	0.946342492479652	non-significant
APLP2	0.000606992072718013	0.999516368160194	non-significant
CD59	-0.134463883963104	0.893286416751957	non-significant
CD82	0.132448262836413	0.906358170765134	non-significant
CTTN	0.461438054053549	0.64836421387072	non-significant
ZW10	3.20415384403935	0.0106728725572254	significant
ALG9	-12.4064835960044	5.54372094423314e-08	significant
MTMR2	-0.711159681536179	0.57571941513894	non-significant
SF3B2	-0.247981693307478	0.8052530449795	non-significant
AAMDC	0.659029535054982	0.511163070430622	non-significant
GANAB	-1.68257717624772	0.0966560529860452	non-significant
ARCN1	0.755137153661569	0.464292133385725	non-significant
RASSF7	0.476623036435214	0.648080704599385	non-significant
CRYAB	0.0576534809470622	0.954036814259581	non-significant
CTSC	-0.512231183240655	0.646487896963751	non-significant
CCDC34	0.208261193865441	0.839164156975945	non-significant
ELP4	0.978651488348239	0.39488592597205	non-significant
ZPR1	-0.461174813747564	0.657441641830479	non-significant
MTCH2	1.58636046568986	0.118469986593824	non-significant
FNBP4	-0.215498688689807	0.833119944926483	non-significant
SC5D	-0.156986058879084	0.877194170965548	non-significant
HSPA8	2.49236535833402	0.0132660837349397	significant
VWA5A	-1.52505112586709	0.159463555396634	non-significant
DNAJC4	-1.40040241895315	0.173276165911128	non-significant
SIAE	1.87362154233596	0.138954632928418	non-significant
SNX15	0.320958843666725	0.772924412150631	non-significant
ATG2A	0.584003683565833	0.577700107914251	non-significant
EHD1	-0.898912265885482	0.384054380237539	non-significant
OSBP	-0.686204298973061	0.51034020732026	non-significant
PUS3	0.282941409509581	0.812891617429532	non-significant
DCPS	2.50118932008273	0.0456709572222916	significant
KMT5B	-0.00924166637337188	0.993026975525664	non-significant
FOXRED1	0.250135807935362	0.815553458120645	non-significant
PPP6R3	-1.204683295779	0.264980480213712	non-significant
ST3GAL4	-0.999790964719934	0.324760148007979	non-significant
CCND1	2.53043637736145	0.01653610097574	significant
CCDC86	0.630922525582819	0.572157134825774	non-significant
PRPF19	1.09796365229689	0.280152729494798	non-significant
TMEM109	0.154603031240232	0.878567311099277	non-significant
CHORDC1	-2.12964847486621	0.0807017685029207	non-significant
ANAPC15	1.43754125836558	0.166990549485636	non-significant
PANX1	0.385568650955677	0.722859022006774	non-significant
ARHGEF17	-1.81874074208247	0.0766376984586	non-significant
EIF4G2	1.00036944475806	0.318618313476929	non-significant
GALNT18	2.70008717152765	0.0538768511404822	non-significant
BIRC2	-0.30816811271325	0.760997833809408	non-significant
UBE4A	0.413263764809503	0.696642665691952	non-significant
DDX6	1.10633524591439	0.275443346144142	non-significant
CBL	-0.36472109050374	0.748302988484392	non-significant
NECTIN1	1.1725851283643	0.290798592388079	non-significant
HIPK3	1.74994490381955	0.0889561300439705	non-significant
FBXO3	1.85002509766606	0.0777184683625309	non-significant
PDHX	-0.778082726532782	0.456686125348987	non-significant
COMMD9	0.392788042550305	0.700655099526062	non-significant
MDK	2.45409869108627	0.0143578350901962	significant
AMBRA1	1.50075638969562	0.134599836732112	non-significant
MADD	-0.0736759929094993	0.951674412062225	non-significant
PTPMT1	0.198296573850644	0.844082744997282	non-significant
NAA40	0.571891447148369	0.58959763454069	non-significant
CD81	-0.0544291794713093	0.956631822128897	non-significant
C11orf58	-0.0899217829816989	0.928579134801164	non-significant
PITPNM1	0.568866893360937	0.606771767179812	non-significant
RPS13	-0.915167768080086	0.360370422165974	non-significant
AIP	-0.3334030496308	0.740867295177959	non-significant
NUP98	0.47614855209387	0.64237475000733	non-significant
NDUFS8	1.11151812860472	0.271744635240781	non-significant
GTF2H1	-0.373421166272006	0.720928152071528	non-significant
CTSD	-0.836305833490862	0.405105790570478	non-significant
IFT46	-0.157782001406515	0.877452250021153	non-significant
APOA1	-0.833044651562174	0.417143194520076	non-significant
RPS25	1.92774542079141	0.0545332914608545	non-significant
SPCS2	0.161399613971883	0.872523163226433	non-significant
SNX19	-1.06333638195806	0.304375763212332	non-significant
KCNJ5	1.38210267686841	0.174981643091615	non-significant
CRY2	-0.020501059821666	0.983960701929824	non-significant
PEX16	0.212756097552686	0.840362524971505	non-significant
CAT	0.21570924413718	0.833667403945993	non-significant
KBTBD4	-0.757463556607233	0.521663060709245	non-significant
AHNAK	0.251357807914034	0.80189265877185	non-significant
FRMD8	1.00511480733004	0.351013179161055	non-significant
PRDX5	0.415146503706617	0.678630553796619	non-significant
COPB1	-1.83509868270603	0.120729326020417	non-significant
PSMA1	-0.771090874208791	0.450586027882084	non-significant
SERGEF	-0.450423805340054	0.720986702814302	non-significant
CSRP3	1.48365486852657	0.138234566009401	non-significant
E2F8	0.156978339434358	0.887581579773736	non-significant
CDKN1C	-0.44049969449669	0.66743679639108	non-significant
STK33	0.95489504848666	0.37334657071864	non-significant
H19	-0.170614747536488	0.864730612021199	non-significant
PPFIA1	-0.764656656648092	0.504063906647072	non-significant
TRIM21	-2.52663174465664	0.0664294770583494	non-significant
ARFIP2	0.400619079673718	0.695320892686602	non-significant
TRIM5	-0.151980040957224	0.888924554135592	non-significant
RRP8	-0.822790732028522	0.427617992335731	non-significant
MACROD1	1.47173540994219	0.160496251559008	non-significant
WDR74	0.216537384852297	0.832071140119362	non-significant
RTN3	1.28449188133737	0.204227679796928	non-significant
SWAP70	2.30681324085365	0.0831265483189191	non-significant
SBF2	-0.457821499318797	0.669608378524689	non-significant
MICAL2	0.543059928837636	0.592541586930463	non-significant
RRAS2	-0.42977471084543	0.671783426947086	non-significant
DPF2	-0.398189507583884	0.698447623103448	non-significant
LDHA	-1.99400778557898	0.0505282199142408	non-significant
MYBPC3	1.64225211341124	0.101126689171838	non-significant
ACP2	-0.769847023512167	0.454637229453288	non-significant
TIMM10	1.92379849328466	0.0626176139528129	non-significant
FADS2	0.373006681238308	0.711946745895748	non-significant
TMEM258	0.1692355858154	0.865943666590781	non-significant
STT3A	-0.423094488582355	0.677038779101363	non-significant
ADAMTS8	-0.826683954096674	0.424180533136669	non-significant
PHF21A	0.133797289876034	0.895514877774231	non-significant
NAT10	0.829899725681956	0.45426508059239	non-significant
CAPRIN1	-1.49232097773039	0.143040265901974	non-significant
FCHSD2	0.641995153985509	0.536957431046544	non-significant
ARRB1	1.75804607126576	0.269641810886927	non-significant
THAP12	1.38510413130965	0.201511386046186	non-significant
NUMA1	1.00567525153889	0.320934795175107	non-significant
CCDC90B	0.927111339439032	0.403781164779388	non-significant
SYTL2	0.450474811504271	0.673370148877465	non-significant
RAB30	0.469646433968173	0.659014949213037	non-significant
CREBZF	-0.0184445500023961	0.985617858470899	non-significant
PRCP	-1.18634267248018	0.248646915018253	non-significant
RNF121	0.710215807741373	0.486483078773793	non-significant
BUD13	1.17769859311301	0.278089561782465	non-significant
DCUN1D5	-0.375593736674111	0.709477087779834	non-significant
YAP1	0.28335332591756	0.779963987313225	non-significant
RDX	-0.900645312618073	0.382014263573807	non-significant
FDX1	1.45846893025462	0.171636444523642	non-significant
C11orf1	-0.00731762597734389	0.994361789261037	non-significant
FXYD6	0.200507215243561	0.841501833460447	non-significant
SIRT3	-0.388678043708259	0.729782252580136	non-significant
IFITM3	-0.153025439421186	0.879074738979576	non-significant
SCYL1	1.82243506553147	0.0804416568813526	non-significant
BTBD10	1.34868223472587	0.201940140343919	non-significant
ADM	-1.83713277340248	0.195803417072312	non-significant
LIN7C	-0.0776933017337144	0.940905093101874	non-significant
IMMP1L	-0.0861004453645224	0.932859133783298	non-significant
TUT1	1.9895908520625	0.0962742032171196	non-significant
HSD17B12	-1.75076909126337	0.307305068369244	non-significant
APIP	-1.25885151883636	0.278302792618808	non-significant
DGKZ	0.328241219582504	0.747477633153952	non-significant
EIF3M	0.708196683011485	0.480838877655753	non-significant
TNKS1BP1	0.0891908979022614	0.941358855716469	non-significant
SSRP1	-1.59661501822417	0.121409637782509	non-significant
PTPRJ	0.65110817817493	0.629561582839416	non-significant
ARFGAP2	-0.353962529540361	0.731312907139486	non-significant
CELF1	1.55204276060723	0.142383430796344	non-significant
HIKESHI	-0.562429102930979	0.580962443954022	non-significant
SESN3	0.155473909457425	0.881674594450448	non-significant
ENDOD1	27.3413570622245	0.00256822631543878	significant
CCDC82	1.72726089321599	0.219985086080396	non-significant
SERPINH1	2.12887458889648	0.0353313695020037	significant
INTS4	0.308711247916278	0.763633028692075	non-significant
RPS3	0.548421640600705	0.583669073895018	non-significant
ZC3H12C	0.862764352032337	0.463755993469098	non-significant
NCAM1	1.70416987243174	0.0920752104397269	non-significant
ATM	-0.181745771640308	0.864641761330207	non-significant
AASDHPPT	0.118798930383686	0.906844844907458	non-significant
LAMTOR1	-0.763264722748887	0.44780612718592	non-significant
HYOU1	-0.950720956372457	0.359657930482993	non-significant
MTA2	-0.622653241469462	0.562555653645763	non-significant
FADS1	1.89561583165611	0.0688890841293722	non-significant
CPSF7	0.0698101575822813	0.945142361877636	non-significant
B3GAT3	0.621073538200799	0.547838878953883	non-significant
EI24	-0.557904826955916	0.581551561760862	non-significant
CHEK1	-0.476091569662106	0.648796588950556	non-significant
FEZ1	0.0873829635982179	0.931994695758276	non-significant
SCN2B	-1.16567968401561	0.312409314957127	non-significant
SIDT2	-0.863206275233178	0.514403809445494	non-significant
TMEM25	1.57145845616986	0.20226908032959	non-significant
TAGLN	-1.77615782387441	0.0775411103480871	non-significant
TRPT1	-0.455454982966948	0.651931268420376	non-significant
NUDT22	0.282775073664707	0.78008793531724	non-significant
MRPL49	-0.578483062206797	0.586532714094171	non-significant
FAU	3.99639422961051	6.87127729919514e-05	significant
TM7SF2	1.69301380820224	0.114370861082849	non-significant
VPS51	0.629051713235712	0.536627083548282	non-significant
CWC15	0.245245396157125	0.806975105495412	non-significant
TMEM218	-0.547205143636182	0.606778140477254	non-significant
PRSS23	0.908699613465176	0.391606805189539	non-significant
DIXDC1	-1.61513389621902	0.118316021704623	non-significant
DLAT	1.19793272601057	0.237690928150652	non-significant
NKAPD1	-1.54731021504661	0.142427033420882	non-significant
TIMM8B	-1.30313246910998	0.194978796499982	non-significant
EXT2	0.588075759442125	0.564777377807344	non-significant
NDUFC2	0.594450256220257	0.553608501470624	non-significant
ME3	-1.66165945041499	0.238138130968946	non-significant
ACAD8	0.322250541262549	0.751900547718223	non-significant
THYN1	0.797236423797512	0.432718206153442	non-significant
VPS26B	0.885179069030643	0.384322988219402	non-significant
NCAPD3	-1.19234541377277	0.28404374494035	non-significant
ARL14EP	0.85442057806758	0.413281611745885	non-significant
GUCY1A2	0.445888010445819	0.681930036196539	non-significant
TMEM123	1.54518207758785	0.135994626059823	non-significant
TBCEL	0.232833832211014	0.828001298317933	non-significant
TBRG1	1.59874641504943	0.17188795836733	non-significant
UBE2L6	0.422332685135467	0.678765240120425	non-significant
ZDHHC5	0.0030720782320047	0.997673398926772	non-significant
MED19	-0.203066055451757	0.841314551514193	non-significant
TSPAN18	0.547051118807977	0.594089835063967	non-significant
MRPL17	1.30270378850132	0.205666186246479	non-significant
EMSY	-0.85419365808515	0.459722992942119	non-significant
ALG8	-0.326972995680068	0.749555647150534	non-significant
SIK3	-0.359545780986995	0.723115204951169	non-significant
PCSK7	-0.905999994868548	0.387330797834337	non-significant
VPS11	0.834219611978325	0.440493412774782	non-significant
NEU3	-0.958472482451478	0.362884188712838	non-significant
CYB561A3	1.91722851051738	0.172405212405011	non-significant
UBXN1	0.17486153973493	0.861996559902621	non-significant
TAF6L	1.08977853316341	0.323740346187541	non-significant
NXF1	0.617946969036577	0.548502254295916	non-significant
STX5	0.696085167055277	0.50872445620337	non-significant
SYVN1	0.712226848716722	0.47649407889545	non-significant
ZFPL1	1.07699992431396	0.37605149747393	non-significant
RPS6KA4	-1.24581494637168	0.301095005309264	non-significant
LRP5	-0.137718736304377	0.894503452850598	non-significant
INPPL1	-2.28482319461503	0.0277035083435886	significant
PCF11	-1.6471751958734	0.124342241408812	non-significant
RPUSD4	-0.0565797522502543	0.963228258610618	non-significant
PACSIN3	2.67745153272304	0.00975583759034029	significant
SLC39A13	-0.273028139563484	0.789465114538617	non-significant
PSMC3	2.14972889937905	0.0340875735910721	significant
SMCO4	-0.856394674380707	0.548682863754138	non-significant
TAF1D	0.751375658372666	0.471933028999763	non-significant
ABTB2	0.169999270190401	0.887941453265361	non-significant
AMOTL1	-0.793938493577956	0.457387471987802	non-significant
CEP57	-1.35038296570555	0.218378660718247	non-significant
JAM3	0.0632872628649147	0.955997529966732	non-significant
ADAMTS15	2.31890180673818	0.0566754942721222	non-significant
API5	-0.302659586243198	0.766858064139539	non-significant
ALKBH3	-1.09509809400799	0.318097334956242	non-significant
CUL5	0.608546952495019	0.591980914535864	non-significant
SMPD1	-0.882274789491169	0.385215510064304	non-significant
APBB1	0.82206679207294	0.418737467460138	non-significant
TRIM44	-1.37507968421019	0.19348225541017	non-significant
ILK	0.350461898610481	0.726621305784567	non-significant
TAF10	-1.27093309552077	0.207137447188478	non-significant
DCHS1	0.827375224233209	0.440356902863438	non-significant
TUB	0.0229322167811487	0.983176595312434	non-significant
RPL27A	0.32295915258787	0.746810038980637	non-significant
AKIP1	0.350745551437574	0.730574762577497	non-significant
TMEM41B	-1.163087388363	0.262276955036168	non-significant
ZNF143	-0.0981879629230497	0.930534992247216	non-significant
WEE1	1.45170998322574	0.152152094958798	non-significant
PLEKHA7	0.868765945405198	0.38520637842985	non-significant
NAV2	0.320103028198655	0.762924059720801	non-significant
PATL1	0.685266800452861	0.552334100544473	non-significant
STX3	-1.8681237488765	0.308848761122578	non-significant
MRPL16	0.500930956219816	0.621728885344397	non-significant
IGF2	1.71383874487696	0.106376387470415	non-significant
ATP5MG	0.524694160559926	0.600317133816033	non-significant
STIM1	1.17237466951189	0.262500857221167	non-significant
RRM1	-0.686015869057877	0.497849247215793	non-significant
OTUB1	1.33154915428691	0.190430224785261	non-significant
RCOR2	1.24103312292359	0.399284005154585	non-significant
NDUFV1	-1.01105558112177	0.315890164181999	non-significant
CDK2AP2	2.02067924860824	0.0678311570241114	non-significant
NUDT8	-2.90120861569085	0.0329712494015588	significant
SDHAF2	1.7649711280405	0.0835790395177745	non-significant
DDB1	-1.41167462335036	0.166814218938702	non-significant
VPS37C	-1.86377997273648	0.0927026755702072	non-significant
FTH1	0.65140022123218	0.515007681741537	non-significant
BSCL2	-0.229494024056598	0.825335012980976	non-significant
POLR2G	-0.377416263193999	0.707098702695839	non-significant
SLC3A2	1.69095195062148	0.106145432377158	non-significant
SPINDOC	-2.35316797618177	0.0401241362458472	significant
FADD	-0.0568907631411205	0.955498372940093	non-significant
LTBP3	-0.548688682321757	0.591269884588241	non-significant
SAC3D1	0.631672959766598	0.533361022656173	non-significant
SF1	-0.887748782524842	0.377832278485354	non-significant
PAFAH1B2	-0.205380059060714	0.840093496003438	non-significant
STIP1	-0.0854098366707824	0.932221764134672	non-significant
FEN1	0.510038216119468	0.617901380762855	non-significant
TMEM223	-0.779662312649175	0.456861278064873	non-significant
METTL15	1.13055530407267	0.331300560255346	non-significant
SIK2	-0.00829198877180134	0.99387002830413	non-significant
USP47	-0.472138718886002	0.640876081107415	non-significant
HSPB2	2.51606537500234	0.0141632403660995	significant
NFRKB	0.51996910904232	0.624197788091344	non-significant
SYT9	1.78268850073685	0.174065314882231	non-significant
MSANTD4	-2.77358018852907	0.039810283035977	significant
DNAJC24	0.644882255730617	0.585400354380784	non-significant
CAVIN3	2.08724500925501	0.0411319491698494	significant
PDGFD	-0.0474065457185865	0.962616160597966	non-significant
C11orf24	0.151971823558225	0.889812785736986	non-significant
TMEM126A	-0.158605976244757	0.877841407776545	non-significant
TMEM126B	0.830626818481451	0.413582789929712	non-significant
MAP6	0.297439364033424	0.803653299702772	non-significant
ANO5	-1.22696858884747	0.248418506997576	non-significant
HINFP	1.2148654791545	0.302799740088869	non-significant
CLP1	1.77851891139005	0.150168445754693	non-significant
FIBP	0.470473638427081	0.642715496557954	non-significant
PPP1CA	0.521876193189043	0.603901099310065	non-significant
EFEMP2	0.283500843942147	0.777444181791878	non-significant
TMEM134	-0.337569646672946	0.739299275003482	non-significant
CORO1B	2.40900487534615	0.0517878575573168	non-significant
MUS81	-0.813040929364209	0.428508790293732	non-significant
CFL1	-0.252273987999637	0.801033698238161	non-significant
SSH3	0.205713032337701	0.846062737514303	non-significant
NADSYN1	-0.369003847861464	0.730925639221257	non-significant
RNASEH2C	-0.0452666162753203	0.964122808180092	non-significant
ANKRD13D	-2.64109412648888	0.0775812795863078	non-significant
KAT5	1.24204540089631	0.226123136505188	non-significant
GRK2	0.396930242091273	0.700055923601611	non-significant
RELA	-0.940125330072177	0.359819239221039	non-significant
TRMT112	-0.0560391779936372	0.95546846659096	non-significant
KDM2A	0.389296756564566	0.702662264200564	non-significant
ESRRA	-1.36508615188909	0.178123575464481	non-significant
RHOD	-0.184973132813771	0.854949765301085	non-significant
GPR137	0.422635149939855	0.676936406610189	non-significant
MAP3K11	1.23354095542678	0.283686547540483	non-significant
EHBP1L1	-0.821333948806965	0.468381482664799	non-significant
RNF26	-0.242249389390908	0.813113993882346	non-significant
PPP1R14B	0.556451551711738	0.579566881340204	non-significant
FKBP2	-0.568388856988825	0.571460475524229	non-significant
VEGFB	0.31698404388553	0.752308191466639	non-significant
LRFN4	-0.966904265620766	0.404475602103768	non-significant
RCE1	1.72773675764443	0.151427917178343	non-significant
RBM4B	0.843352127074648	0.442606611853899	non-significant
RBM4	1.13631455939052	0.26131326060695	non-significant
CCS	0.646033690586327	0.53134887899815	non-significant
CTSF	-1.42783058926195	0.212880652162044	non-significant
ZNHIT2	-0.450270491822008	0.711617533510214	non-significant
BBS1	-1.29354477992394	0.303718675545195	non-significant
MRPL11	0.333861163366698	0.739802655512044	non-significant
SLC29A2	-2.14954759281978	0.0758044597210999	non-significant
B4GAT1	-0.346125607429674	0.734390035895297	non-significant
BRMS1	0.523473201753225	0.613846710323401	non-significant
HRAS	-0.777057187083989	0.443553977443166	non-significant
YIF1A	1.00348219601369	0.33547335958651	non-significant
RAB1B	-0.58034960733555	0.565056872307531	non-significant
PTDSS2	0.0368831527978584	0.973546256299154	non-significant
KLC2	-0.156399425563143	0.878558060613546	non-significant
TRAF6	-0.955076946033147	0.367507786154649	non-significant
PACS1	1.90475633351181	0.0649686771262708	non-significant
ZNF408	-0.197361340628729	0.871470921897038	non-significant
CKAP5	0.969043659703454	0.34751817013382	non-significant
ARHGAP1	-1.06482763950066	0.29461981675051	non-significant
ATG13	0.622585135855388	0.615179627426337	non-significant
GAL3ST3	-1.85418770094474	0.136031593351319	non-significant
TP53I11	-1.53025257398128	0.137298545748518	non-significant
BANF1	-0.0893215676656799	0.928971197382326	non-significant
TMEM9B	0.683030908465774	0.504531079694537	non-significant
EIF1AD	-0.00393141250146059	0.996961369906339	non-significant
EIF3F	-0.108536597876955	0.913950764886267	non-significant
SART1	0.364262459295949	0.717924999483821	non-significant
POLD4	0.171646348303487	0.871412552299233	non-significant
DRAP1	-0.204116322042085	0.83874116534977	non-significant
UCP2	21.9026122862975	0.0218720341599026	significant
C11orf68	-1.50868062479992	0.150650533310403	non-significant
PAAF1	-0.353005578608049	0.745829896863812	non-significant
MRPL48	0.418399037445426	0.691981326713741	non-significant
RAB6A	-0.0517186508198827	0.959011294461652	non-significant
CCDC85B	-1.24085024590209	0.234808578298122	non-significant
RPS6KB2	0.183146336251803	0.855958492296652	non-significant
CSTF3	-0.270038903120067	0.793214098810645	non-significant
COX8A	0.5359558429161	0.592420745401611	non-significant
RPL37AP8	0.605250621010172	0.601914176400048	non-significant
FAM89B	0.815018011168007	0.425392860127628	non-significant
DEAF1	0.770498098437304	0.447800913530638	non-significant
TMEM80	-1.11349448504987	0.292973304367374	non-significant
ZDHHC13	-0.525929862859358	0.615107704813496	non-significant
SCN4B	1.62811357136319	0.170217991599743	non-significant
RHOG	-0.388684958256753	0.719053472054557	non-significant
TALDO1	2.65261344980755	0.00940307185545395	significant
GATD1	-0.784647381723184	0.519165909974486	non-significant
RPLP2	4.90774612983974	1.06848649364145e-06	significant
PNPLA2	0.973457087949925	0.340008563024427	non-significant
CD151	0.944838686980686	0.347144485384246	non-significant
POLR2L	1.22879737086905	0.220419659994468	non-significant
CHID1	1.94680430033982	0.0578802096943002	non-significant
RIC8A	0.43855701129389	0.663750255052479	non-significant
SLC35C1	-0.128874522025827	0.9000487277765	non-significant
COA4	0.23750943282994	0.814369473683272	non-significant
MOB2	-0.717505548804838	0.480205461500454	non-significant
KCNA4	-0.246562606111728	0.813964566009712	non-significant
KBTBD3	-2.40552948052168	0.0575315130918459	non-significant
C11orf54	-2.90522416917813	0.0134673866131154	significant
SRPRA	-1.19656622582698	0.266212330786794	non-significant
CADM1	1.1714844633136	0.259850622839224	non-significant
AP2A2	0.06756567276998	0.946751509390718	non-significant
FANCF	0.888315658743531	0.419432544920646	non-significant
DENND5A	-2.11549364388314	0.0374522595848636	significant
TSSC4	0.179097975468217	0.859787150955019	non-significant
MAML2	-0.532241458703093	0.649349746422042	non-significant
DUSP8	-1.41458026561078	0.18001994861181	non-significant
WT1	-0.110523225500791	0.913501852958618	non-significant
INTS5	-0.133026888817001	0.896382700035757	non-significant
IFITM2	-1.15967503007924	0.269942519738856	non-significant
PRMT3	0.0275825282369818	0.981663617204902	non-significant
TMEM179B	-0.137014153134768	0.892480693056851	non-significant
PSMD13	1.73460240830719	0.0865307152663446	non-significant
BCL9L	0.306675709084833	0.765662454782858	non-significant
BACE1	0.0863660037981935	0.94321113234278	non-significant
ARAP1	0.485421455478802	0.629598909165855	non-significant
ZFP91	0.404949440839877	0.691276856537353	non-significant
TEAD1	1.10726558004178	0.276615044332677	non-significant
FAM111B	0.538272136542288	0.616934091419145	non-significant
ZBTB44	-0.539640760920245	0.607881018140278	non-significant
TRAPPC4	1.66180923534812	0.109940498455263	non-significant
ARHGEF12	0.505463260869439	0.621261373396695	non-significant
PCNX3	1.52332616775085	0.228145373214503	non-significant
MRPL21	1.02037983359429	0.314555264175672	non-significant
BCO2	-1.26095816452045	0.271872663384718	non-significant
FAR1	-1.05388541581645	0.309806349937823	non-significant
PARVA	-1.01510028185549	0.316151285576594	non-significant
FAM118B	0.247077335269986	0.809875512211129	non-significant
SVIP	-0.632645599361635	0.531922505479173	non-significant
UVRAG	0.401864545365258	0.697845466854962	non-significant
CTNND1	-0.783347460661833	0.438300187554237	non-significant
CTR9	-0.269647839207086	0.792396779831159	non-significant
SDHD	0.506086202566404	0.614329941212757	non-significant
UQCC3	0.645145553053134	0.534045629095592	non-significant
LGR4	1.27822814106506	0.204382194198206	non-significant
IPO7	-1.45145870473421	0.161686648757252	non-significant
NAP1L4	0.635019002036809	0.527067981063639	non-significant
SELENOH	-0.827086497357738	0.410849646359453	non-significant
SIPA1	1.28882702265842	0.254188742424573	non-significant
ARL2	-1.41844496410493	0.172041391764129	non-significant
TMX2	0.532349858996625	0.597492776951432	non-significant
NDUFS3	0.117164699286111	0.906868534141372	non-significant
MRPL23	1.61701798617646	0.114406558872477	non-significant
TSPAN4	2.08251515083797	0.0461694611954143	significant
PPME1	-0.117505804647523	0.911952021240482	non-significant
STARD10	0.408180001736139	0.686388735533751	non-significant
HNRNPUL2	0.580586873255878	0.564986435732586	non-significant
FADS3	-0.027201933086501	0.978578520576869	non-significant
RPS28P7	2.24457934986997	0.0255393632210731	significant
SRP14P2	2.41397671671916	0.06077080018854	non-significant
RPL26P30	-0.284237604475172	0.809900427835729	non-significant
ZBED5	-0.47671556591353	0.639390033575671	non-significant
RBM14	0.327018337417599	0.747659412868332	non-significant
RPL37P2	1.03022491664821	0.308568050723075	non-significant
BDNF-AS	-0.00592044150588978	0.995563149607058	non-significant
ZBED5-AS1	1.45977391637185	0.232199135302733	non-significant
RBM14-RBM4	0.90524259197436	0.369495699054811	non-significant
MALAT1	-0.981467446983658	0.338924916170719	non-significant
NAV2-AS2	-0.560196758815037	0.582339379742202	non-significant
AP5B1	1.42537255354797	0.384569400758322	non-significant
EEF1G	-1.09736520168154	0.272822027477575	non-significant
DPP3	2.19010544095457	0.0647626347497201	non-significant
FXYD6-FXYD2	0.0859551546831083	0.931675351194027	non-significant
MIR100HG	1.23416291893941	0.240364688498669	non-significant
SNHG1	0.365285456358399	0.720189957445541	non-significant
HMBS	-0.358646218737231	0.735225716496993	non-significant
SPON1	0.34887349527312	0.72896214931208	non-significant
SRSF8	-2.24541680060513	0.0727671472830232	non-significant
C11orf98	0.0435330995590257	0.96579751970086	non-significant
GSEC	-0.601725611279758	0.607023930997935	non-significant

## Sheet: unblock
gene	statistic	pval	marker
BAD	-20.338973602357	3.65483431438702e-39	significant
ZNF195	-4.02204994008345	0.0490462976539054	significant
USH1C	-6.54912734578391	1.1957117122854e-05	significant
PIK3C2A	-1.72713442753586	0.131186966347819	non-significant
CAPN1	-10.2719463599169	3.26103883882344e-14	significant
PHLDB1	-6.98349508564171	1.66952065815106e-07	significant
PRDM11	-2.24068380471426	0.10579672795733	non-significant
SYT13	-4.24559630272857	0.0020773351873101	significant
PLEKHB1	-6.58253848877825	0.00164072960728847	significant
RNH1	-12.8103938570447	4.62500947901184e-22	significant
NUP160	-2.54036660591056	0.0383270315081643	significant
GAB2	-2.79243480417124	0.110889404075294	non-significant
USP2	-2.37906126372497	0.0257172503772271	significant
MED17	-6.39172486449854	1.35200764857452e-05	significant
USP28	-5.66415536487902	1.60859724304706e-06	significant
RCN1	-7.44918219666378	7.27281580216238e-09	significant
DKK3	-18.363773835539	4.66156198465967e-45	significant
TTC17	-3.41492359349515	0.013931211341946	significant
KCNQ1	-5.56861685093452	4.85258152768744e-05	significant
FAM168A	-2.81514956723818	0.0181784266037695	significant
QSER1	-1.45823470322464	0.240494672900188	non-significant
SPA17	-3.81288873133519	0.00885112366753502	significant
CDON	-4.44315678774457	0.0443539102844743	significant
MPPED2	-4.15222964919814	0.000771322218559343	significant
RASGRP2	-0.973834092062592	0.37548946579756	non-significant
PYGM	-5.6707512229146	5.24706284042856e-05	significant
NUCB2	-6.19602715120279	1.95944810282645e-06	significant
MARK2	-1.41401621666987	0.188564766160115	non-significant
PICALM	-6.90666495971521	7.75581602547163e-08	significant
CLNS1A	-9.15190328340373	4.91475235941528e-10	significant
EED	-4.53261497905657	0.00185799823255992	significant
TSG101	-12.8362680521353	1.31800980198773e-17	significant
ACAT1	-20.3029703575535	8.10166261802228e-37	significant
REXO2	-9.2511324056917	1.90691543798434e-11	significant
RBM7	-5.4931995929368	9.21988310236453e-06	significant
POLD3	-3.45820497977976	0.0105704084614489	significant
TOLLIP	-3.99905960668802	0.000940849421469428	significant
GSTP1	-18.8900983945846	9.71530600646779e-49	significant
APLP2	-19.2080946170832	1.75923475013783e-50	significant
CD59	-16.5190834988809	1.02906097305315e-37	significant
CTTN	-4.00478440601875	0.00102252120515651	significant
ZW10	-4.55932271515697	0.00105808328027679	significant
ALG9	-14.7913130269253	2.48457830013997e-10	significant
MTMR2	-4.9474648233427	0.00078199173873499	significant
SF3B2	-5.90847886121124	2.36112538108716e-06	significant
AAMDC	-6.00456762769735	1.60205572876874e-07	significant
GANAB	-6.81335662586254	1.63851942966975e-08	significant
ARCN1	-7.17244989060357	1.03273155280751e-07	significant
RASSF7	-3.67290923414201	0.014081806512081	significant
CRYAB	-57.4781895641023	0	significant
CTSC	-4.36083791118821	0.00165164761217415	significant
CCDC34	-8.57531757035664	1.45283478307033e-10	significant
ZPR1	-7.8833797926268	1.70170095403882e-07	significant
MTCH2	-12.498029178932	1.34943945155788e-19	significant
SC5D	-9.27483415331327	1.04377652246595e-10	significant
HSPA8	-35.1106683928092	3.96006754785676e-145	significant
VWA5A	-3.50570609079927	0.0163712559165275	significant
DNAJC4	-9.30455881333184	3.24546798895086e-11	significant
SIAE	-1.70766741763734	0.185450546472936	non-significant
SNX15	-6.47128215851689	1.05272257495022e-05	significant
EHD1	-6.66562113213544	1.50666322934214e-06	significant
OSBP	-3.21278529699322	0.0233448570341534	significant
PUS3	-3.20901530346994	0.0101805964246641	significant
DCPS	-7.61415804219437	5.01667254729687e-06	significant
KMT5B	-3.36823139854408	0.0118478488523821	significant
PPP6R3	-4.29192075098138	0.000556195314721057	significant
ST3GAL4	-12.4426715800778	6.87209943958742e-13	significant
CCND1	-6.432521951072	4.37811557842709e-07	significant
TMEM109	-11.5668826044266	1.76738100238128e-14	significant
CHORDC1	-5.55153847806092	0.00215375542456647	significant
ANAPC15	-5.45036059870549	6.3474618442213e-05	significant
ARHGEF17	-6.6059841365544	1.1548308020002e-06	significant
EIF4G2	-21.7665692142424	4.34812467449272e-64	significant
UBE4A	-2.94685342269105	0.0149367257961669	significant
DDX6	-3.53598579371418	0.0016833152222949	significant
NECTIN1	-4.15150367076166	0.000897920412606371	significant
HIPK3	-6.44145353462246	5.64939896870396e-08	significant
FBXO3	-8.40660906047042	6.61477383335505e-09	significant
PDHX	-10.3900218392134	2.30707549989301e-12	significant
COMMD9	-6.63139485636053	3.15752319440962e-06	significant
MDK	-43.6904312737811	1.08197992318964e-212	significant
AMBRA1	-7.86577742676038	1.36784321782147e-13	significant
MADD	-1.07874535611907	0.475467347186208	non-significant
PTPMT1	-8.8633892831656	5.55774329337925e-11	significant
NAA40	-4.58452482221457	0.00224681958744727	significant
SLC22A18	-6.97945107471393	0.000136740979372358	significant
CD81	-26.7169291811937	7.32132307666983e-81	significant
C11orf58	-13.6508789295312	8.78980045031259e-27	significant
RPS13	-27.0856826906921	2.40845021030201e-124	significant
AIP	-14.1235214395079	7.56261025291408e-12	significant
NUP98	-2.78755635935782	0.0286966402159406	significant
NDUFS8	-19.6693390503537	7.19223181777823e-48	significant
GTF2H1	-5.91455750458507	3.47472248658759e-05	significant
CTSD	-12.7564832055594	1.05999197069367e-22	significant
IFT46	-4.00166531551596	0.00197290603960228	significant
APOA1	-2.61337303662435	0.0203512170590684	significant
RPS25	-21.8829121185199	3.35667656506203e-61	significant
SPCS2	-17.665881888922	4.18028800163061e-32	significant
SNX19	-4.19405060581071	0.000932947612125324	significant
KCNJ5	-5.56107789676371	1.48634289350326e-06	significant
CRY2	-6.4910556390465	2.01575698510157e-06	significant
CAT	-5.65106863482961	0.000164043647118275	significant
KBTBD4	-11.79570528068	8.34388826198364e-10	significant
AHNAK	-10.3074493366025	4.88869765088762e-19	significant
PRDX5	-29.0144911514679	1.08706467041883e-82	significant
COPB1	-9.44257294017839	1.52099057836392e-10	significant
PSMA1	-15.1398562658131	1.77271106668927e-24	significant
SERGEF	-4.97488649798238	0.00336898730347293	significant
CSRP3	-57.9634739335742	0	significant
E2F8	-3.21447850248339	0.0225805161871628	significant
CDKN1C	-6.67320125535428	1.66326153227366e-07	significant
STK33	-3.24288814453829	0.0164384987348551	significant
H19	-21.1665106781923	1.62123078740748e-69	significant
ARFIP2	-6.47130945147497	0.000156900793151143	significant
TRIM5	-1.23657457932746	0.340513946391135	non-significant
RRP8	-2.65878823828269	0.0237607557741738	significant
TIMM10B	-0.0727094234818252	0.946798186417053	non-significant
IGHMBP2	-1.05266676281292	0.39833267406476	non-significant
MACROD1	-8.30863479659965	6.11548926921179e-11	significant
WDR74	-5.60083211483216	0.000238258706258081	significant
RTN3	-14.7705321769015	5.15465161113475e-28	significant
SWAP70	-5.2873564002768	0.00271088155451284	significant
SBF2	-4.30718349738721	0.00141968485006024	significant
MICAL2	-6.50837122920988	1.77794563757285e-07	significant
RRAS2	-6.86275364261516	3.03314034676223e-06	significant
DPF2	-7.6425224773364	2.14469318933374e-08	significant
LDHA	-27.1616542326049	2.43680178555659e-71	significant
MYBPC3	-22.7173683771353	1.97945692584516e-70	significant
DDB2	-3.17191819083135	0.193309849050806	non-significant
TIMM10	-3.20702051890982	0.0113806944072781	significant
FADS2	-9.37801388195681	4.35786599796233e-14	significant
TMEM258	-4.81376753281036	1.07168193344814e-05	significant
STT3A	-4.29538059297489	0.000744359561688968	significant
ADAMTS8	-5.1008136925572	0.000522004464351343	significant
PHF21A	-4.46690262649044	0.000371500209441832	significant
NAT10	-2.17742928881636	0.116700048104512	non-significant
CAPRIN1	-10.7467502323887	4.48315475478982e-16	significant
FCHSD2	-4.74838960062493	0.000554014250444844	significant
THAP12	-4.98333923176237	0.00738071820667759	significant
NUMA1	-6.8282799435769	5.02872936463817e-08	significant
CCDC90B	-6.40408487569837	5.68696222908067e-07	significant
PRCP	-10.5715397170729	6.13399514991749e-09	significant
NARS2	-3.33123662718859	0.0207158991073018	significant
BUD13	-6.51444013976668	0.000643865617178217	significant
DCUN1D5	-4.61082056405827	6.31122706966609e-05	significant
YAP1	-8.12252155478255	7.66995259344053e-11	significant
SLC37A4	-2.82712892235179	0.0302175574687512	significant
RDX	-6.34854785946869	3.31406925238979e-07	significant
FDX1	-10.4714350777505	1.60520420369204e-13	significant
C11orf1	-6.82594116441068	3.048926698064e-07	significant
FXYD6	-22.1419890899719	1.93262386640328e-57	significant
SIRT3	-6.77772870313365	3.63327690858209e-06	significant
IFITM3	-9.50799814000366	3.56639025625534e-11	significant
CDCA5	-4.73205671856446	0.017666381344575	significant
BTBD10	-4.90797658214689	0.00105837999258049	significant
ADM	-3.59541757716715	0.0337728821907992	significant
LIN7C	-1.79278542052927	0.20812208418746	non-significant
IMMP1L	-2.87743027937278	0.0102658305078078	significant
TUT1	-2.86767623280553	0.0326309133838545	significant
HSD17B12	-10.4472074762667	5.93995930845662e-09	significant
DGKZ	-5.86910014103412	1.50327841530227e-05	significant
EIF3M	-25.1640935145517	5.06359093618767e-76	significant
TNKS1BP1	-3.81171187424326	0.0145857641579994	significant
SSRP1	-5.31660196520085	1.93403974500889e-05	significant
PTPRJ	-2.66955316462094	0.0525881282615342	non-significant
ARFGAP2	-7.6892419628052	1.2117959540979e-08	significant
CELF1	-3.60505291759383	0.00532326335410241	significant
HIKESHI	-17.2360951348806	1.09424602554451e-30	significant
SESN3	-2.22100712062626	0.0894181349203906	non-significant
SERPINH1	-14.1148515640802	1.75028228884544e-25	significant
INTS4	-3.11547751330144	0.0141925157491825	significant
RPS3	-64.7650893801164	0	significant
TTC12	-7.53850283024045	0.0638530117868947	non-significant
NCAM1	-12.8290506710149	6.56815844061154e-24	significant
ATM	-1.5053679912278	0.226450113531167	non-significant
AASDHPPT	-7.43694519389432	6.7642520266073e-08	significant
LAMTOR1	-4.53014552773898	2.42733190677299e-05	significant
HYOU1	-4.77101215192158	0.000566885666441431	significant
TMEM138	-4.16413914661424	0.0715372351755149	non-significant
FADS1	-8.26400844751829	4.77600303657815e-10	significant
EI24	-5.99475417972837	1.0355329787825e-06	significant
FEZ1	-4.65961175016821	0.000276186051762759	significant
TMEM25	0.230608530684618	0.824615729975464	non-significant
TAGLN	-20.8045013254897	9.58593061643576e-56	significant
TRPT1	-11.7706637833421	4.84597671724618e-14	significant
NUDT22	-9.5539230076494	0.000211361179506944	significant
MRPL49	-10.6269443608299	1.23334008023316e-11	significant
FAU	-13.8995137699919	2.41583708086201e-22	significant
VPS51	-8.06715774560104	9.26678702595613e-10	significant
CWC15	-9.0925794673388	2.4822851050072e-11	significant
PRSS23	-4.65880138360063	0.00135115996700994	significant
DIXDC1	-6.69646951040986	4.24088256429819e-06	significant
DLAT	-9.25976576861101	3.04830400532919e-12	significant
NKAPD1	-3.60120575932021	0.00243351022214499	significant
TIMM8B	-4.52138025968753	1.60550114463639e-05	significant
PTS	-6.1129794721873	3.86138736550669e-05	significant
UEVLD	-3.74254872561942	0.0181684633618582	significant
EXT2	-4.66816649623968	0.00152042195615834	significant
NDUFC2	-17.5517043063075	3.82907160144966e-39	significant
ACAD8	-9.61537792415586	9.78222029779122e-07	significant
THYN1	-9.87448123892695	5.13541763412271e-10	significant
VPS26B	-5.68085230697278	1.71513632208153e-05	significant
ARL14EP	-4.43832524038652	0.000350434838483247	significant
PDE3B	-1.41146067867193	0.246554304889298	non-significant
GUCY1A2	-4.44703654595248	0.000635700947036038	significant
TMEM123	-8.37821124947988	1.48730082406498e-10	significant
TBCEL	-2.78561403536238	0.0377368920768993	significant
TBRG1	-3.97776686432291	0.0466914852613716	significant
UBE2L6	-7.88681838223696	1.93341874498651e-07	significant
ZDHHC5	-2.75083152639233	0.110087948177757	non-significant
MED19	-9.33000622646049	1.58914405135441e-08	significant
TSPAN18	-6.22288230379926	3.62181149682507e-06	significant
MRPL17	-6.90895410860055	1.27871535013809e-08	significant
EMSY	-1.36709442715212	0.303611798232144	non-significant
ALG8	-6.73717603446054	0.000102311273306784	significant
SIK3	-3.13450704624988	0.00852113021496695	significant
PCSK7	-4.38010448222622	0.000687653637696454	significant
VPS11	-2.72062696249634	0.0228021032302122	significant
NLRX1	-3.76147275220556	0.0128974611135232	significant
CYB561A3	-5.94823931566288	0.00029484111735216	significant
UBXN1	-8.25654358814279	1.32898619054666e-11	significant
TAF6L	-2.47733780011663	0.039709586839997	significant
NXF1	-5.9868314204014	2.01334373507113e-05	significant
STX5	-4.54315894021914	0.000668439566507165	significant
SYVN1	-2.63434937985512	0.0171728083559898	significant
LRP5	-3.66744857688441	0.00675650714176801	significant
INPPL1	-5.83006864773069	7.40948528699791e-06	significant
PCF11	-3.39009718976461	0.00672906318351082	significant
RPUSD4	-5.37562904726177	9.55186286260336e-05	significant
ARHGAP42	-2.67476059724064	0.226578861119813	non-significant
PACSIN3	-7.77024345796798	1.41369034439816e-08	significant
SLC39A13	-5.89467587249108	1.30279881979024e-05	significant
PSMC3	-9.66960402618878	3.86481851970573e-15	significant
NELL1	-8.04099833683733	0.0729754688775797	non-significant
TAF1D	-5.08377811443933	3.54153445705746e-05	significant
ABTB2	-5.06403728936444	0.000953981309506216	significant
AMOTL1	-3.60906508400681	0.0105202806149447	significant
CEP57	-8.02050920343579	1.28315148898168e-08	significant
ADAMTS15	-2.52817546978626	0.0353088638568256	significant
API5	-6.46325247597179	4.59171999504463e-07	significant
CUL5	-2.28665278012207	0.0588633796012652	non-significant
SMPD1	-6.07030528775055	8.54500559162537e-06	significant
APBB1	-9.40617028595107	1.93673295868722e-12	significant
TRIM44	-4.53759476772921	0.000243974173055605	significant
ILK	-14.1714872529674	3.13984939938349e-24	significant
TAF10	-11.9845121345161	1.56103416589003e-21	significant
DCHS1	-3.32563169029266	0.00756662453933058	significant
RNF169	-2.21915731858405	0.0670449893034631	non-significant
RPL27A	-28.5634045788995	1.42183807935297e-136	significant
AKIP1	-5.20919680802929	5.96146168390987e-05	significant
TMEM41B	-5.07869357012244	0.00021278005351775	significant
ZNF143	-2.05573141017768	0.13114737489744	non-significant
WEE1	-12.2598326152515	6.5890190480822e-22	significant
TMEM135	-2.44281191800413	0.246021260973117	non-significant
PLEKHA7	-12.3322062169161	3.90055717587233e-32	significant
NAV2	-5.09537025473492	0.000161869767477129	significant
PATL1	-3.87070513235576	0.00283494937306674	significant
STX3	-19.4440313700383	0.000125206252973465	significant
MRPL16	-10.9403655247053	4.30152068014922e-11	significant
IGF2	-5.40257897272406	1.947324624596e-06	significant
ATP5MG	-20.5484393604847	3.70531413613516e-69	significant
STIM1	-5.27537680420677	0.000116733240827515	significant
RRM1	-7.8301010837235	4.17610390504373e-09	significant
OTUB1	-5.66863323074782	6.46904598566454e-07	significant
NDUFV1	-21.8492360125382	2.59468324429186e-44	significant
CDK2AP2	-6.519904996348	3.37196923359058e-06	significant
NUDT8	-11.7915701889741	4.36490607861138e-06	significant
SDHAF2	-6.62806780988857	0.000180734317443708	significant
DDB1	-14.027565618563	1.38282856860952e-23	significant
VPS37C	-5.42289926413936	0.000317827788821984	significant
FTH1	-82.9296525848888	0	significant
BSCL2	-3.5904359833851	0.0109537325693825	significant
POLR2G	-7.16788512509263	1.06267359481217e-09	significant
SLC3A2	-6.06324468448073	2.69104707778411e-05	significant
SPINDOC	-9.52101576993356	7.48262607812147e-07	significant
FADD	-6.14798569943651	0.00039526093596899	significant
LTBP3	-4.0886025505106	0.00178203531050066	significant
SAC3D1	-9.23842550568092	1.0978962188771e-07	significant
SF1	-5.82565196328448	2.73600241183335e-07	significant
PAFAH1B2	-4.77770991445398	0.000178498871371061	significant
STIP1	-10.5809207329673	1.77605146867669e-15	significant
FEN1	-7.40006280820178	8.04752251424157e-08	significant
TMEM223	-8.68447164322351	2.68141124677824e-11	significant
ANKRD49	-17.6735749108334	1.64668883086755e-06	significant
METTL15	-3.91848599583358	0.00433556390606851	significant
SIK2	-3.00863275672753	0.0152658857665092	significant
USP47	-5.53075453884028	1.79607408883322e-05	significant
HSPB2	-16.302898127341	1.24804137971488e-35	significant
SYT9	-1.66714281565629	0.15636281658186	non-significant
MSANTD4	-3.12593422750251	0.0332510537232537	significant
DNAJC24	-5.7305769580125	0.000178590205638848	significant
CAVIN3	-17.3519812434262	8.209814078683e-23	significant
PDGFD	-2.99511075157434	0.00632227774589224	significant
TMEM126A	-8.93778787577926	9.85792370682304e-12	significant
TMEM126B	-15.482938703649	2.17530954407097e-27	significant
MAP6	-2.08619605091447	0.101705999211364	non-significant
ANO5	-4.30375694527389	0.00100424701667976	significant
HINFP	-3.49506696217041	0.0094771046190893	significant
FIBP	-7.72670604014674	6.25045664832321e-09	significant
PPP1CA	-15.7540276331598	1.6756804914446e-31	significant
RAD9A	-2.64566945408305	0.116545212978453	non-significant
EFEMP2	-15.0849072502569	4.39951200976764e-30	significant
TMEM134	-10.3476169481033	3.66019139929895e-12	significant
MUS81	-4.16451954849039	0.00112023869218306	significant
CFL1	-46.7498046735764	8.67506488220249e-241	significant
NADSYN1	-1.10528387559848	0.349553869253608	non-significant
DHCR7	-2.34796150766371	0.0825920379791552	non-significant
RNASEH2C	-5.02210806619026	0.000327215068609422	significant
KAT5	-2.99759955828674	0.0121427646953785	significant
GRK2	-5.0567417233863	0.000213387671677863	significant
RELA	-6.40461502897002	2.19633354925719e-06	significant
TRMT112	-13.3735045168304	1.51506079633528e-17	significant
KDM2A	-3.36934650353685	0.00544088814170688	significant
ESRRA	-10.7668399400568	4.0409542219547e-12	significant
RHOD	-8.55892149442635	2.28219747444068e-07	significant
GPR137	-4.898524967021	0.00036517442174394	significant
RNF26	-3.16180903472288	0.0110883572419781	significant
PPP1R14B	-12.7305486619435	3.58108218422161e-21	significant
FKBP2	-1.30578934192998	0.30944955780649	non-significant
VEGFB	-16.5932219721115	5.60774363186265e-31	significant
RCE1	-3.35329280098394	0.0194599906288982	significant
RBM4B	-2.27706916582159	0.0688780820165557	non-significant
RBM4	-10.8346695723231	7.80831337644495e-15	significant
CCS	-4.97719489982387	0.0003641254189542	significant
CTSF	-9.52427935649975	9.48515536504072e-08	significant
ZNHIT2	-6.49167770436332	0.0574707322186973	non-significant
MRPL11	-13.223952201286	2.60025366563391e-18	significant
B4GAT1	-7.34398586591191	2.20817400017575e-08	significant
BRMS1	-6.4083211094491	5.01862968227204e-06	significant
HRAS	-10.9703529840505	6.5272493983937e-07	significant
YIF1A	-8.28086166517647	1.57693840816883e-09	significant
RAB1B	-12.7762460999898	5.19241057552383e-21	significant
PTDSS2	-6.06484526655185	0.000442549417502407	significant
KLC2	-3.74181410892087	0.0123980879834325	significant
TRAF6	-3.68261481576669	0.0120080692318192	significant
PACS1	-4.36817957088485	0.0001010895559124	significant
CKAP5	-5.00718977723187	4.50134164704524e-05	significant
ARHGAP1	-6.93115105390901	1.17498329925178e-07	significant
ATG13	-4.90243619310821	0.00020578259477625	significant
GAL3ST3	-2.63992796731705	0.0656448213554539	non-significant
BANF1	-16.6093503572989	4.66089076698113e-41	significant
TMEM9B	-4.70993608248146	0.000360281018432112	significant
EIF1AD	-4.34976613845534	0.00232960331069181	significant
EIF3F	-19.0717247830122	8.6579139408559e-42	significant
SART1	-4.46315014247026	0.000229026402155413	significant
POLD4	-7.07531663471802	2.59769634390339e-06	significant
DRAP1	-13.2259674021664	4.78057151303329e-20	significant
C11orf68	-8.88813045732484	1.49011336343575e-10	significant
PAAF1	-6.42602953405808	7.52864272767358e-05	significant
MRPL48	-6.45414342459274	0.000262881486628957	significant
RAB6A	-9.85639100133278	1.48643938008128e-12	significant
CCDC85B	-15.4447955181017	9.36553197410202e-08	significant
RPS6KB2	-5.67006249213785	4.5917497676668e-05	significant
CSTF3	-1.70976037113632	0.121319272255777	non-significant
COX8A	-19.5333003638121	1.25422234036147e-51	significant
FAM89B	-10.8170311077442	2.1868349804737e-17	significant
DEAF1	-4.03035686959334	0.000595461862578133	significant
TMEM80	-3.19516637516905	0.00976972202090604	significant
ZDHHC13	-3.73060880104634	0.0128906984398362	significant
RHOG	-5.22912085136345	0.00043413060167946	significant
TALDO1	-11.2169086015837	1.3221490710647e-11	significant
RPLP2	-24.9948957971687	8.43651260463707e-79	significant
PNPLA2	-15.8207814493109	9.23779581509065e-17	significant
CD151	-29.0029128681798	6.89187442600481e-85	significant
POLR2L	-16.3988673290565	1.24822162623372e-47	significant
CHID1	-7.15947551795567	1.36272637815746e-08	significant
BET1L	-2.7287364671868	0.0205250082452054	significant
RIC8A	-5.77175922205062	8.84125754181221e-06	significant
SPTY2D1	-3.33520884885067	0.0202948298458684	significant
LDLRAD3	-2.94202954147642	0.0986701722130172	non-significant
COA4	-12.550994681405	5.52714493369925e-13	significant
MOB2	-6.48453155385072	1.79546234005231e-05	significant
KCNA4	-4.31241597096854	0.00424372638319937	significant
C11orf54	-4.73700502762927	0.000897588643459296	significant
SRPRA	-6.63733809717917	3.4445223764713e-06	significant
CADM1	-8.25988526363699	1.02288229410114e-09	significant
AP2A2	-4.47183772528835	0.000328934769907551	significant
FANCF	-2.72831456095777	0.0223845095226662	significant
WT1-AS	-0.407192138167978	0.706870344706932	non-significant
DENND5A	-10.8621570208445	3.68909984397121e-16	significant
TSSC4	-7.57263977232563	5.85597113190782e-07	significant
WT1	-8.58672764007665	2.00830262667829e-09	significant
INTS5	-3.02477692515752	0.0215925260573348	significant
IFITM2	-5.13751287647139	0.000162835388796018	significant
TMEM179B	-7.16410152349113	1.58933191410885e-06	significant
PSMD13	-9.89273090608772	1.31687720308801e-09	significant
BCL9L	-2.02476112274658	0.0887732981213543	non-significant
BACE1	-2.94126125428683	0.0285887100056004	significant
ARAP1	-5.18068390447246	1.5610150548572e-05	significant
ZFP91	-5.98261106518473	7.95797614273384e-06	significant
TEAD1	-4.53871092291825	0.000150974494845093	significant
KCTD21	-2.88858422944041	0.0458111859752084	significant
FAM111B	-3.55884751558542	0.00947041334947758	significant
ZBTB44	-4.59832490275348	0.000722365856539227	significant
TRAPPC4	-6.68941209481625	7.10404758858291e-07	significant
ARHGEF12	-4.82583846268496	7.6157390498545e-05	significant
PCNX3	-1.57226387035837	0.212081775063634	non-significant
MRPL21	-9.24739975663948	9.82840643876536e-14	significant
BCO2	-4.41304084256227	0.000355726939668369	significant
FAR1	-3.08648991802532	0.0149493754227962	significant
PARVA	-7.93041938577838	4.39690919380376e-10	significant
FAM118B	-7.3822472872825	0.000593313561016665	significant
SVIP	-3.08466614665533	0.00596922192482762	significant
HYLS1	-2.87929701725367	0.0272360996336759	significant
CTNND1	-8.2934081024801	3.62660092191813e-11	significant
CTR9	-4.0030939317636	0.00303274325920544	significant
SDHD	-16.7374673334068	1.03200711813758e-33	significant
UQCC3	-3.62737973294227	0.00542719743961015	significant
LGR4	-9.72258764029159	2.58148454188816e-16	significant
IPO7	-9.4430646349685	6.34471106813205e-13	significant
NAP1L4	-12.3781561039967	1.26813512396837e-19	significant
SELENOH	-3.59355263353059	0.000682333972318027	significant
ARL2	-18.2168029533765	1.35937290919116e-26	significant
TMX2	-6.42288380189463	1.02460087827938e-07	significant
NDUFS3	-17.3824922654048	2.67901136019725e-36	significant
MRPL23	-2.72187273676906	0.0491048198010884	significant
TSPAN4	-6.44944012949442	1.45767253207357e-06	significant
PPME1	-4.63989219232785	0.00114816655860318	significant
HNRNPUL2	-4.97087741815007	2.26261525439175e-05	significant
FADS3	-7.06992002131853	3.04859047018798e-07	significant
RPS28P7	-13.6864722958248	4.4541355730863e-31	significant
RPL26P30	-1.81536041577051	0.178885675270071	non-significant
ZBED5	-11.5449447543269	1.64021015101179e-13	significant
RPL37P2	-2.01391951988179	0.0532415115684325	non-significant
ZBED5-AS1	-3.69846833374723	0.0124332519435994	significant
RBM14-RBM4	-11.8031246078663	1.5085095880196e-17	significant
MALAT1	-6.17330293595709	3.39821792441357e-05	significant
NAV2-AS2	-5.14569419466034	0.000124353876825643	significant
EEF1G	-79.3432837025672	0	significant
FXYD6-FXYD2	-21.9629130095913	6.4058219319388e-57	significant
MIR100HG	-3.8178129275891	0.000897913926039335	significant
HMBS	-6.8841330445587	0.00151162807286091	significant
SPON1	-9.41244894318544	2.92617196893059e-14	significant
SRSF8	-4.34271053505415	0.00218352049041881	significant
C11orf98	-6.85489132312514	1.32153152964739e-06	significant
