# Supplementary material
Source: HighWire-hosted journal article supplement (doi:10.1101/rna.079727.123)
Supplement: Supplementary_Table_9.xlsx [file Supplementary_Table_9.xlsx]

## Sheet: all
gene	statistic	pval	marker
BAD	6.10713081800411	1.27410834538441e-08	significant
ZNF195	0.883528074847288	0.407746876638745	non-significant
TMEM132A	0.51469369360188	0.615760935492885	non-significant
USH1C	3.86547641891083	0.00146628087326951	significant
PAX6	-1.2275610475122	0.344358230204701	non-significant
PIK3C2A	-0.256699673773775	0.807141561282132	non-significant
POLA2	1.64484679548587	0.115766536607599	non-significant
CAPN1	5.10044840873813	1.54698257055194e-06	significant
PHLDB1	1.9352729262416	0.0580920530537256	non-significant
PRDM11	1.20593942250942	0.254008111686069	non-significant
SYT13	0.401412359513568	0.691230698159125	non-significant
PLEKHB1	1.26645660802099	0.252459842472963	non-significant
OSBPL5	0.795563077600074	0.446870041290658	non-significant
RNH1	4.40368342321551	2.70377936878166e-05	significant
CD44	-0.867864198375509	0.443782385234624	non-significant
NUP160	-0.287439537836461	0.776264350401698	non-significant
GAB2	1.25471237322831	0.327452169714937	non-significant
USP2	1.32739540740345	0.192613189469857	non-significant
MED17	3.24686410019365	0.00241590195013132	significant
USP28	1.47625400291599	0.143090247896925	non-significant
RSF1	0.661572027873097	0.517765036778502	non-significant
RCN1	4.1768289750489	9.84156783011694e-05	significant
DKK3	6.86142700585609	3.02225960171914e-11	significant
TTC17	1.14766854960139	0.260142943667893	non-significant
KCNQ1	1.02458168436497	0.310788808609083	non-significant
FAM168A	2.3052784828633	0.0305677387488873	significant
QSER1	1.23664475289779	0.237761662349811	non-significant
SPA17	1.50769396316484	0.154788675659662	non-significant
TSPAN32	1.03897679957116	0.486701826456892	non-significant
CDON	-0.733617210197363	0.477310785816111	non-significant
MPPED2	2.80974879209108	0.00695890088718193	significant
RASGRP2	2.60957358841092	0.0237553916567372	significant
PPP2R5B	1.73748017288952	0.127248060505638	non-significant
PYGM	1.70926137575396	0.0970635334046013	non-significant
PHRF1	-0.932191388245541	0.374689730095122	non-significant
NUCB2	2.59201644536798	0.0125516582051485	significant
MARK2	1.34860921261837	0.190445174311713	non-significant
PICALM	1.42074826060782	0.159076498399665	non-significant
CLNS1A	5.80075767714885	2.37103481789907e-07	significant
EED	5.44810547795012	7.30623761778674e-06	significant
TSG101	8.41630424341436	1.35107882048404e-13	significant
ACAT1	7.93894192985096	2.88678129708605e-13	significant
REXO2	10.4729209510514	6.12559239625789e-17	significant
RBM7	2.71237139089221	0.0103032686988532	significant
FAM76B	0.718450932940089	0.5850961977517	non-significant
POLD3	0.504729817939376	0.627075240461981	non-significant
ACER3	-0.3455671667472	0.750688074883086	non-significant
TOLLIP	0.176610493264648	0.86046380813284	non-significant
IGSF9B	1.94282796392905	0.0691276835404818	non-significant
PGR	2.58787558314639	0.0693508626252371	non-significant
GSTP1	16.8199849093266	6.35753267996864e-51	significant
APLP2	11.3185300435192	2.75941700850442e-26	significant
CD59	7.4439062382887	7.11617539033069e-13	significant
CD82	2.84930007496031	0.0425389362773104	significant
CTTN	1.07164451226602	0.290218646892515	non-significant
ZW10	0.825824595843351	0.442216686434463	non-significant
ALG9	1.44629086432048	0.162290126962821	non-significant
MTMR2	2.03610607487967	0.0491931740429066	significant
SF3B2	3.41265404682082	0.00103426819036482	significant
AAMDC	4.99065870140938	1.18697604356484e-06	significant
GANAB	2.70762410492224	0.00762020261236685	significant
ARCN1	1.27304537634118	0.207704390334125	non-significant
RASSF7	2.53361374730899	0.0230378456078957	significant
CRYAB	42.2089685973267	2.13711629850603e-311	significant
CTSC	3.70042196133957	0.00200825872224759	significant
CCDC34	7.00981630637817	1.05020645030056e-09	significant
ZBTB16	2.07876537681997	0.0830684464762761	non-significant
ELP4	2.18460918916569	0.0378242257812615	significant
ZPR1	2.87578076394626	0.00684516888047982	significant
MTCH2	5.85724765023575	1.99880553363246e-08	significant
FNBP4	1.98448637748997	0.0563221009186923	non-significant
SC5D	2.91446614001954	0.00513708220616908	significant
HSPA8	14.3328460758891	1.1408026016422e-42	significant
VWA5A	2.82480049157165	0.0143625803038518	significant
DNAJC4	3.26259135818955	0.00158368816887619	significant
SIAE	0.15082108930372	0.883114785081425	non-significant
SNX15	2.41388048577013	0.0217136518991034	significant
ATG2A	-0.136502855574519	0.89398525626579	non-significant
EHD1	3.0143884854919	0.00420893453109141	significant
OSBP	0.979361716533539	0.335517481514052	non-significant
PUS3	1.13659111795295	0.314273673592212	non-significant
DCPS	3.21512664958272	0.00289763077582396	significant
KMT5B	3.1035335543366	0.00360476270228372	significant
FOXRED1	1.31316472077613	0.204113007061278	non-significant
PPP6R3	2.62017671367403	0.011703118881476	significant
ST3GAL4	3.74082788261089	0.000372824062316574	significant
CPT1A	2.51848963395928	0.0737603012337485	non-significant
CCND1	1.94628170276896	0.0566700766545994	non-significant
CCDC86	0.0753574600109552	0.941080495530618	non-significant
PRPF19	4.79956633366925	1.15437790397426e-05	significant
TMEM109	4.69776126004135	1.15958014657754e-05	significant
TRIM3	1.59817626693165	0.232861105524905	non-significant
CHORDC1	2.00455309933322	0.0579468660212675	non-significant
ANAPC15	1.97853577327026	0.0589212874871115	non-significant
PANX1	0.855458740643206	0.441429742915788	non-significant
ARHGEF17	1.47681303691033	0.143901186270875	non-significant
RNF141	2.32506650434269	0.0403798492115902	significant
EIF4G2	8.42915359835248	1.95493472570769e-16	significant
GALNT18	2.66652149477057	0.0217701988057385	significant
BIRC2	2.27524616455625	0.0297391018336917	significant
UBE4A	0.561273631238463	0.579481066034879	non-significant
DDX6	2.92062536590049	0.00490871702492794	significant
CBL	3.88864146820744	0.0047309027580864	significant
NECTIN1	2.13660551052324	0.0454217095572606	significant
HIPK3	2.65162081136494	0.00895164253397693	significant
FBXO3	6.24059463943812	3.36375505718775e-08	significant
PDHX	5.25177843388575	1.74594804568417e-06	significant
COMMD9	5.6039245375262	6.01596686546943e-07	significant
MDK	29.3764662723126	3.20627534474319e-155	significant
AMBRA1	1.53966287616271	0.124563149797861	non-significant
MADD	-0.124597787862197	0.904196364768532	non-significant
PTPMT1	1.86133006392495	0.0670031860822517	non-significant
NAA40	1.24372664385739	0.242311334732717	non-significant
SLC22A18	1.74097718490826	0.0960787261992582	non-significant
CD81	17.5447589103091	1.83641385637719e-55	significant
C11orf21	-1.58121768754691	0.243623447207914	non-significant
SOX6	1.3133872137161	0.248692094737144	non-significant
C11orf58	8.8665947139006	1.54497556199019e-16	significant
PITPNM1	0.40302896980219	0.694682987713056	non-significant
RPS13	38.5984474108483	4.02500404079461e-249	significant
AIP	4.97975670000082	8.36109616943981e-06	significant
NUP98	2.47845595386552	0.0224705422116861	significant
NDUFS8	16.9468697489245	1.7823878493937e-47	significant
CHKA	1.72441798322445	0.13043301417467	non-significant
HPS5	1.43707302965792	0.278485380042071	non-significant
GTF2H1	1.54706307435248	0.136216664339085	non-significant
CTSD	4.82497022582835	2.96253703486571e-06	significant
KMT2A	0.37085290769788	0.769113945597984	non-significant
IFT46	1.37197857934067	0.189740325129122	non-significant
APOA1	1.79936065058427	0.0797617997652816	non-significant
RPS25	66.7581902559384	0	significant
SPCS2	9.8946764201604	9.9320716540343e-19	significant
USP35	1.80876612559373	0.113743291193443	non-significant
SNX19	1.17397463227998	0.256378500363269	non-significant
KCNJ5	1.87385214974533	0.0645575721506585	non-significant
MSANTD2	2.53253588720937	0.0391260638971049	significant
KIF18A	1.04863206381215	0.346813344013037	non-significant
MAPK8IP1	0.900053006701092	0.38337938916848	non-significant
CRY2	2.13153871434435	0.038239510781319	significant
PEX16	1.55999384402786	0.16976561671485	non-significant
CAT	1.93086208428999	0.068123230705179	non-significant
KBTBD4	-0.339683115764613	0.736875397554238	non-significant
MYRF	2.0798259793905	0.0621640689864661	non-significant
AHNAK	2.46868118663576	0.0139157615338245	significant
FRMD8	1.28719842718498	0.232616638539674	non-significant
PRDX5	17.5392992141103	4.98305812033482e-52	significant
COPB1	4.48234534021067	2.26843981767846e-05	significant
PSMA1	4.41751854671703	1.94419170877648e-05	significant
SERGEF	0.0479505843611415	0.962617343588226	non-significant
CSRP3	37.9696014879444	1.30098992242668e-261	significant
E2F8	1.31697690574996	0.241721875468816	non-significant
CDKN1C	2.21066111154328	0.0351777295536111	significant
STK33	0.570062791109387	0.579892490624907	non-significant
H19	14.4881315453973	9.11368643558584e-43	significant
PPFIA1	-0.2808761687683	0.784239450429043	non-significant
TRIM21	0.887053955034723	0.396199139799805	non-significant
ARFIP2	1.89164984556741	0.0737050780395478	non-significant
TRIM5	0.764468099674284	0.479969695040502	non-significant
RRP8	1.18401635346106	0.251456854663895	non-significant
TIMM10B	0.214287511827702	0.832493070563158	non-significant
IGHMBP2	0.16350257129762	0.878042365231758	non-significant
MACROD1	2.76198383137641	0.00820964544670949	significant
WDR74	3.49832577022866	0.00175299511898904	significant
RTN3	7.91918817916935	4.66962786452934e-14	significant
SWAP70	4.01373520495377	0.00326077117982176	significant
SBF2	2.02443928470912	0.0615351714956026	non-significant
MICAL2	3.64504875554064	0.00050778959252552	significant
RRAS2	1.82080668638903	0.077390274963395	non-significant
DPF2	2.64363343769272	0.0109292142870292	significant
MEN1	-1.3896223620052	0.200439004279456	non-significant
LDHA	12.5224061325303	5.18380316526283e-30	significant
LRP4	-0.644724811140679	0.566402840554835	non-significant
MYBPC3	12.4936297693762	3.70177686589368e-33	significant
DDB2	1.21414816982738	0.339801824970297	non-significant
ACP2	2.60374749453616	0.0161364742529304	significant
TIMM10	8.85397907478698	1.25479531798146e-12	significant
FADS2	4.57326940446081	1.08915551485903e-05	significant
TMEM258	14.8064093799355	4.95655748208799e-39	significant
ARHGAP32	3.49150920179152	0.0304803906705747	significant
STT3A	3.28135814555359	0.00190029310346243	significant
ADAMTS8	-0.282978553265369	0.780085330304664	non-significant
ETS1	-0.325099363013235	0.754852129520644	non-significant
PHF21A	1.6637782801511	0.105027598538057	non-significant
NAT10	0.70456325038294	0.492127483571294	non-significant
CAPRIN1	3.51966799887426	0.000601946058585942	significant
FCHSD2	0.294756766799706	0.771703304339968	non-significant
ARRB1	-2.47861672793454	0.11100607144978	non-significant
THAP12	1.4553867038405	0.160117118406305	non-significant
NUMA1	1.356828624664	0.17956000355724	non-significant
CCDC90B	4.62305198344463	1.82673418729508e-05	significant
SYTL2	0.549270513148833	0.592307262734453	non-significant
RAB30	2.70497996865395	0.0405555112907356	significant
CREBZF	2.02968973779747	0.059401783188848	non-significant
PRCP	0.713202509116981	0.481105740489365	non-significant
NARS2	5.81215920310695	0.000329257254641979	significant
RNF121	2.32863653444514	0.0252153186233172	significant
BUD13	1.86019209881099	0.0896237900136601	non-significant
DCUN1D5	8.38902313131069	2.06298631491338e-12	significant
YAP1	3.09339284762359	0.00276269665333571	significant
SLC37A4	0.784910523351253	0.453152515244562	non-significant
RDX	1.91336535415863	0.0589061740063979	non-significant
PPP2R1B	0.182599767765107	0.863625384624133	non-significant
FDX1	4.78983258632668	1.00133806524908e-05	significant
C11orf1	6.40602820159706	1.13725269570958e-07	significant
FXYD6	10.0352526257544	1.10732129401702e-20	significant
ARHGAP20	1.50765857609678	0.261091879415826	non-significant
ALKBH8	-0.0155757722677383	0.989030639110953	non-significant
SIRT3	0.0878458499983917	0.931209028565589	non-significant
IFITM3	15.7149184118622	1.30288104424434e-32	significant
SCYL1	3.35675083122519	0.00157791272578678	significant
CDCA5	1.80152803090092	0.090859245566482	non-significant
BTBD10	3.26296749398362	0.00205875295320474	significant
ADM	-0.136632975148086	0.895217763719961	non-significant
GAS2	1.42423748283269	0.385107980640957	non-significant
LIN7C	-0.169833757334841	0.868921604773837	non-significant
IMMP1L	2.95938776135528	0.00549151018847088	significant
PGAP2	2.64589471599907	0.0285709632561777	significant
TUT1	0.0565610337192462	0.956942252747874	non-significant
HSD17B12	2.52700422259924	0.0141455407862681	significant
APIP	3.13039631510372	0.00746073726074132	significant
DGKZ	2.46834071366988	0.0172344098371798	significant
EIF3M	9.5654934571397	7.95857273455707e-20	significant
TNKS1BP1	2.02080187629917	0.109093510351963	non-significant
SSRP1	2.33419269964435	0.0226118227069856	significant
SLC43A1	0.458968863535098	0.712087773986332	non-significant
PTPRJ	0.914069846969573	0.451037749871906	non-significant
ARFGAP2	2.40891484653193	0.0189113383850771	significant
CELF1	1.97746491938584	0.0602199138993901	non-significant
HIKESHI	5.53221485526809	2.10854514023488e-07	significant
SESN3	2.28004485783174	0.0681819308454487	non-significant
CCDC82	-0.112572855625576	0.911728086190304	non-significant
SERPINH1	7.06932960735529	1.93769604399761e-11	significant
INTS4	5.01738956010161	0.000187115813827198	significant
PAK1	7.05480474788675	0.000350411649726603	significant
RPS3	28.0402936497207	1.40360478984473e-145	significant
ZC3H12C	1.30929976040849	0.21195848030302	non-significant
TTC12	3.34641403547794	0.013539316418532	significant
NCAM1	6.70136558355757	1.07422168823846e-10	significant
NPAT	-1.82978661639022	0.153093019588243	non-significant
ATM	-1.1680734280118	0.317113109401301	non-significant
AASDHPPT	4.8577898785831	4.53519783684339e-06	significant
LAMTOR1	3.33434818113922	0.00117745529148072	significant
HYOU1	1.41792671898656	0.166272524764739	non-significant
TKFC	-0.227648130041188	0.825911271458202	non-significant
MTA2	-0.780968185095114	0.452528304920685	non-significant
TMEM138	5.6693935063777	0.00557782970312967	significant
FADS1	4.45655271103587	2.86225383249702e-05	significant
CPSF7	0.679018073586117	0.501383287389181	non-significant
B3GAT3	2.19210086521948	0.0392051803504602	significant
EI24	3.49869329282298	0.000760024313088384	significant
CHEK1	1.6681824195427	0.115620422148304	non-significant
FEZ1	2.78499528555938	0.0133083185428659	significant
SCN2B	-0.257561768089338	0.800024150415917	non-significant
SIDT2	0.946117416249854	0.3708704006621	non-significant
TMEM25	0.614819097355069	0.563347355660436	non-significant
TAGLN	7.19440158383613	1.84957658149948e-12	significant
TRPT1	7.35766305566846	2.18452958803912e-10	significant
NUDT22	7.74183501988663	1.62594315449155e-10	significant
PLCB3	-0.71387784153652	0.502223183450595	non-significant
MRPL49	5.87187935101233	2.95515235933373e-07	significant
CDC42EP2	-0.96014519582308	0.482897531681618	non-significant
FAU	69.3121162034966	0	significant
TM7SF2	4.09289875265648	0.00020628629961673	significant
VPS51	2.14834094812288	0.0348747825784446	significant
CWC15	7.67728954346457	2.55324107312737e-12	significant
TMEM218	3.11787931551656	0.0146715621607825	significant
TIRAP	0.627867264577961	0.641118585486364	non-significant
PRSS23	1.53633323782532	0.136626902824264	non-significant
DIXDC1	1.09804141414486	0.275747467257854	non-significant
DLAT	4.23933813169835	5.28924794192775e-05	significant
NKAPD1	1.3459982525676	0.189960859931859	non-significant
TIMM8B	8.3327178406759	1.70807576970818e-14	significant
PTS	1.30481234996021	0.20199663126745	non-significant
UEVLD	1.6515590500352	0.167377592006382	non-significant
EXT2	1.74707242620144	0.090341932850787	non-significant
NDUFC2	23.0272005355342	6.40641731079403e-73	significant
ME3	0.966786298485096	0.389954207708394	non-significant
ACAD8	1.78902836020324	0.0826893410841451	non-significant
THYN1	3.90438671141822	0.000253777901076918	significant
VPS26B	1.67602911417244	0.102277662181899	non-significant
NCAPD3	1.93120793484543	0.0687857723808984	non-significant
ARL14EP	2.67667945163406	0.0103104868971312	significant
PDE3B	0.57541704778221	0.579577278379667	non-significant
GUCY1A2	1.85603706909646	0.073314984846133	non-significant
CWF19L2	1.30693863521207	0.32161074269718	non-significant
TMEM123	4.44606476141019	2.03249485022445e-05	significant
TBCEL	1.72454551047612	0.111269754297473	non-significant
TBRG1	2.35491185218558	0.0322823489943923	significant
NRGN	-0.229168799338526	0.856569138894566	non-significant
UBE2L6	4.07415410386997	0.00022429827433931	significant
ZDHHC5	-0.1179632053732	0.906692382612648	non-significant
MED19	3.37135194813084	0.00523950742301567	significant
TSPAN18	3.04794087414587	0.00358544391287208	significant
MRPL17	2.82192073628676	0.0061074362742516	significant
EMSY	0.495641545150533	0.628815238412599	non-significant
ALG8	3.06671241253586	0.0203610168770646	significant
SIK3	2.04907788388057	0.0515489098525375	non-significant
PCSK7	1.69266588754011	0.105073132702207	non-significant
VPS11	2.86318374192684	0.0128742702132021	significant
NLRX1	2.2741518387109	0.0485064345174495	significant
NEU3	0.898661238367214	0.386136996460368	non-significant
CYB561A3	0.219860489772536	0.831811051086327	non-significant
ASRGL1	1.16895218031888	0.305775015143371	non-significant
UBXN1	2.49079459154142	0.0155090679628559	significant
LBHD1	4.45511172251946	5.68432733179905e-05	significant
TTC9C	-0.032215924561738	0.975026786369629	non-significant
TAF6L	-0.0419911232270138	0.967631035513474	non-significant
NXF1	3.15066207459375	0.00387274094427255	significant
STX5	1.42777252346735	0.16529264436413	non-significant
SYVN1	31.6890831676651	1.17818852215455e-156	significant
ZFPL1	6.22460684640246	5.43915575182626e-06	significant
RPS6KA4	0.659083215046495	0.519395311123588	non-significant
LRP5	-1.42802493720986	0.169682112492247	non-significant
TPCN2	-1.20553829456968	0.33670460130822	non-significant
FAT3	1.30583582440632	0.219475780628625	non-significant
INPPL1	1.17547211338673	0.243682596448181	non-significant
PCF11	0.111332750548387	0.915672306034101	non-significant
RPUSD4	1.96296048364716	0.0708030694643457	non-significant
ARHGAP42	0.432994048855006	0.705516593564489	non-significant
PACSIN3	5.73556590674749	2.47549880951562e-07	significant
SLC39A13	1.11268978940101	0.270615448268081	non-significant
PSMC3	7.63914754055739	1.09867758817607e-12	significant
CEP295	0.0165057933802265	0.987533762388937	non-significant
TAF1D	2.0863264504167	0.0424433268537651	significant
ABTB2	0.636989620179396	0.539482203543673	non-significant
AMOTL1	1.36832655762445	0.1884350389228	non-significant
CEP57	2.05854779610762	0.0501012107892415	non-significant
JAM3	1.8268148082394	0.0888637709812118	non-significant
ADAMTS15	-1.67454653935397	0.138091917895628	non-significant
SPATA19	1.19935970080202	0.352269387861851	non-significant
API5	2.67990988125863	0.00972306719401115	significant
ALKBH3	0.819041758341031	0.442389921370052	non-significant
CUL5	1.06267041351037	0.30217053053499	non-significant
SMPD1	2.31771810931915	0.025748879062667	significant
APBB1	3.90118229106304	0.000164792305916704	significant
TRIM44	2.45092878920076	0.0174740475378221	significant
ILK	5.88327405681554	1.78267630267269e-08	significant
TAF10	4.70404953769396	4.42450032996211e-06	significant
TPP1	0.556636395339725	0.585329558493487	non-significant
DCHS1	2.78154264445354	0.013356008239431	significant
TUB	0.936725796314979	0.424085201501935	non-significant
XRRA1	2.72707881986432	0.0259698960893873	significant
RNF169	-0.718948553642396	0.481797486653217	non-significant
RPL27A	28.7803954444179	1.44710164686841e-161	significant
AKIP1	2.08461022118807	0.0446549753887395	significant
TMEM41B	-0.337107185980506	0.738289080559033	non-significant
ZNF143	0.953098592861249	0.350919403645589	non-significant
WEE1	5.7146076345497	3.75454794779757e-08	significant
TMEM135	3.36883535421854	0.0201399175312093	significant
PLEKHA7	8.51217795581536	3.37750349780492e-17	significant
SAAL1	0.587781843580243	0.657818121931604	non-significant
FAM111A	0.56218453544506	0.587939202367088	non-significant
NAV2	0.452943289718477	0.653655477866977	non-significant
PATL1	1.99944907285697	0.0593301934564065	non-significant
STX3	2.48667096662707	0.175042227795545	non-significant
MRPL16	4.59010108409595	2.10732361702388e-05	significant
IGF2	2.86415223180738	0.00514899728896547	significant
RNF214	1.39410063400945	0.183056814912931	non-significant
ATP5MG	23.3986765968262	1.98888500509921e-97	significant
STIM1	2.73747010521586	0.00913095042616099	significant
RRM1	1.86952939230473	0.0650861036461431	non-significant
TRIM68	0.838944180015074	0.55438811772642	non-significant
OTUB1	2.71969520479938	0.00926227284994059	significant
RCOR2	3.55978325893545	0.00225113466353619	significant
NDUFV1	8.52328595762628	3.68229631166813e-15	significant
CDK2AP2	7.11075994369664	1.57420127472596e-07	significant
NUDT8	2.35311157696206	0.0402410364237973	significant
SDHAF2	5.21410084387485	1.57256599567827e-06	significant
DDB1	4.84319112400833	2.61093304835981e-06	significant
VPS37C	2.01376076226333	0.064193306023314	non-significant
RAB3IL1	1.46774063998809	0.16901737328875	non-significant
FTH1	57.8033856273045	0	significant
BSCL2	0.0680374987297234	0.946667634416393	non-significant
POLR2G	4.83925089838351	3.77534813506296e-06	significant
SLC3A2	2.56002023058859	0.0147656311789095	significant
SPINDOC	2.24495289815842	0.0375130746658702	significant
C2CD3	0.96112739623599	0.391129799814296	non-significant
FADD	3.07661389687762	0.0049762822580669	significant
LTBP3	2.85112415000127	0.00649971665227784	significant
SAC3D1	4.8648358584239	3.41637515700481e-05	significant
SF1	1.63575450772768	0.104921397552857	non-significant
PAFAH1B2	1.17905575439319	0.245687766484436	non-significant
STIP1	0.517633797572874	0.605615197310422	non-significant
FEN1	1.68850965686884	0.0993210022044739	non-significant
TMEM223	1.90081060835845	0.0617253555226029	non-significant
ANKRD49	1.90681987460455	0.0860954300095035	non-significant
METTL15	0.0278942485374494	0.97812658133086	non-significant
SIK2	1.91732733220109	0.0694372277268958	non-significant
USP47	1.89298211897976	0.0668648218979698	non-significant
HSPB2	5.55342783336793	7.58418284168912e-08	significant
NFRKB	2.205183211481	0.0459522166576317	significant
PRDM10	-0.360250546844411	0.742594024709308	non-significant
SYT9	0.564448570331595	0.583047934476438	non-significant
MSANTD4	3.87176382513449	0.00277678459291835	significant
DNAJC24	3.99808682514151	0.00088477926801986	significant
CAVIN3	8.1656488661968	6.47097124877109e-12	significant
PDGFD	2.8845913179218	0.00540048219445522	significant
C11orf24	1.49428772642511	0.153543607667599	non-significant
TMEM126A	3.20134581263088	0.00217507769371836	significant
TMEM126B	8.14846638860297	5.70263187675712e-14	significant
MAP6	0.272421936374887	0.79084718077645	non-significant
P2RY6	0.40669519073983	0.725336296392146	non-significant
ANO5	1.21462656880179	0.238536483822052	non-significant
DPAGT1	1.98589123336681	0.0830090990096811	non-significant
HINFP	0.460475687644797	0.654142439940286	non-significant
C2CD2L	2.33724139456333	0.0823251511788883	non-significant
CLP1	2.81967883786884	0.0166879501221562	significant
FIBP	3.77064736555059	0.000290942199719166	significant
PPP1CA	4.40771497987148	1.89681568766996e-05	significant
RAD9A	1.15376600064184	0.365193987188929	non-significant
EFEMP2	4.25166822611079	3.37283834449337e-05	significant
TMEM134	4.6292558150075	1.28126671490584e-05	significant
CORO1B	1.49847497546862	0.151177490697708	non-significant
MUS81	2.04097377284345	0.0570225403811414	non-significant
CFL1	20.8266113047514	7.92401031934598e-81	significant
SSH3	1.27878433449006	0.225401724895018	non-significant
NADSYN1	-0.302059407381493	0.767049538496038	non-significant
DHCR7	1.3168300252115	0.198828875056777	non-significant
RNASEH2C	3.45374897068787	0.00160417813648297	significant
ANKRD13D	1.55775950940133	0.187686264299367	non-significant
KAT5	2.63216044929159	0.0162991166842061	significant
GRK2	1.06328137742729	0.294197905700203	non-significant
RELA	2.76408893726294	0.00740884951929403	significant
TRMT112	26.3684626803341	8.51821217830952e-70	significant
KDM2A	1.79138584774793	0.0954506669074996	non-significant
ESRRA	4.18054389138891	7.22901733439051e-05	significant
RHOD	7.54177933598703	3.16271877481242e-09	significant
GPR137	2.73920808963755	0.0220944561539542	significant
MAP3K11	0.719150806998618	0.482423550400729	non-significant
EHBP1L1	-0.124679907242808	0.910520376971582	non-significant
RNF26	0.74128258859881	0.468784665858383	non-significant
PPP1R14B	7.67226781800682	3.38039411463036e-12	significant
FKBP2	5.86086456895215	3.72752342379138e-08	significant
VEGFB	8.74270003409612	8.77331170941479e-16	significant
LRFN4	0.38134943122001	0.710802410661892	non-significant
RBM4B	1.312053989815	0.213536285971408	non-significant
RBM4	6.45833343013372	3.90714103522593e-09	significant
CCS	2.26677452215271	0.0381933226771073	significant
CTSF	1.14710035802687	0.271323708889957	non-significant
ZDHHC24	-0.26442350788581	0.834356512510801	non-significant
ZNHIT2	3.14856277848655	0.00508651565165916	significant
BBS1	0.924193881482204	0.387404869311983	non-significant
PELI3	-0.237069651575718	0.832046270247111	non-significant
MRPL11	8.69324170305581	2.16186435872679e-12	significant
SLC29A2	1.27348225409096	0.251976152047257	non-significant
B4GAT1	1.17005897342571	0.249679827445785	non-significant
BRMS1	2.29475928716967	0.0313871080756533	significant
HRAS	4.25887253072872	6.40916519666951e-05	significant
YIF1A	2.84837583402423	0.0060655524173485	significant
RAB1B	5.15915178457261	7.13779883424259e-07	significant
PTDSS2	1.54316845833467	0.13180092950118	non-significant
KLC2	1.3861497505643	0.177130692636341	non-significant
TRAF6	1.34851234099809	0.196380190079179	non-significant
PACS1	1.9477524764816	0.0548697977803495	non-significant
CKAP5	2.32171063029387	0.0235856449590655	significant
ARHGAP1	0.763227367091547	0.449140265830814	non-significant
ATG13	0.238692124193912	0.812608866759434	non-significant
GAL3ST3	-1.44551162990891	0.17334799885318	non-significant
TP53I11	3.51943810140401	0.0011323872258603	significant
BANF1	22.0494311385144	4.35265403501354e-66	significant
TMEM9B	3.48149192119028	0.000951162400088767	significant
EIF1AD	1.66443662323283	0.116334320432512	non-significant
EIF3F	9.92576439479589	5.8594605619478e-20	significant
SART1	2.49939678152219	0.0226526289059339	significant
POLD4	0.755480504417046	0.453945058099301	non-significant
DRAP1	2.35296672740567	0.0199086597334532	significant
UCP2	1.19709532125473	0.353387125626333	non-significant
C11orf68	2.68444041034388	0.0113277841630899	significant
PAAF1	2.38577717120822	0.0322274328631851	significant
MRPL48	8.78416336224682	1.93588289579815e-10	significant
RAB6A	3.53044625723177	0.000668158215942277	significant
CCDC85B	1.63431386690572	0.106799683088883	non-significant
RPS6KB2	3.41292256962271	0.00159892574255005	significant
CSTF3	3.99616531868059	0.000335581613613386	significant
COX8A	38.1153506867422	1.24440331590919e-174	significant
BDNF	-1.23538668749221	0.259398195353441	non-significant
FAM89B	2.4968111950427	0.0135320971572262	significant
DEAF1	3.90108916738898	0.000265157979926184	significant
TMEM80	4.76276462858108	2.58318508571639e-05	significant
ZDHHC13	1.18895173150489	0.291933710083359	non-significant
SCN4B	-0.0950111862785445	0.931115618327996	non-significant
RHOG	2.13911464486058	0.0437819521959437	significant
TALDO1	11.689137204617	1.75060651708468e-22	significant
GATD1	3.45318869740159	0.00291560837565218	significant
PIDD1	0.769226453714685	0.476673556285484	non-significant
RPLP2	86.3502460175829	0	significant
PNPLA2	3.85069904094531	0.000283178500123569	significant
CRACR2B	0.178172506590572	0.874344052832844	non-significant
CD151	13.1848428074279	6.79625475348789e-34	significant
POLR2L	26.2395150424511	1.24596440944093e-111	significant
CHID1	3.34935538291526	0.00122983581517976	significant
BET1L	2.55118865843062	0.0170463656896068	significant
RIC8A	3.72887013902163	0.000372324393854231	significant
DDX10	2.55570641838652	0.0307087973704509	significant
SPTY2D1	0.187551747976377	0.853521749333109	non-significant
FJX1	3.1832665599944	0.0133257764101439	significant
HARBI1	-0.807561442333093	0.505379167019459	non-significant
C11orf71	0.641423370590169	0.539854940527996	non-significant
SLC36A4	0.793536187114907	0.442874466339661	non-significant
SLC35C1	-0.583142663664902	0.569169662670056	non-significant
COA4	10.3039785207679	3.25029201305312e-16	significant
MOB2	3.09431944943779	0.00327296297997702	significant
KCNA4	1.04888972889177	0.310119017233024	non-significant
KBTBD3	0.212638888917475	0.838599449523642	non-significant
TSKU	-0.735490117996856	0.530813037033372	non-significant
C11orf54	0.937883935283062	0.353127203203234	non-significant
SRPRA	2.34903667325747	0.0226676817873894	significant
CADM1	2.71985781709656	0.00827156761616927	significant
AP2A2	2.46220341056481	0.0178624452946835	significant
FANCF	3.48281100489801	0.00189752437902322	significant
WT1-AS	0.279826854731741	0.791439438762475	non-significant
JRKL	2.51203975618826	0.0625038501905038	non-significant
DENND5A	4.11303109427235	6.56227067522301e-05	significant
LRTOMT	-0.00789228134737723	0.994142053380628	non-significant
TSSC4	0.763796989315853	0.449066626044964	non-significant
MAML2	-0.501298917149074	0.634098985639401	non-significant
CEND1	1.75616577930839	0.216080159930991	non-significant
DUSP8	5.01346151888116	2.49052554707988e-05	significant
OR7E14P	1.53328261654269	0.185773126322527	non-significant
WT1	5.91474145308194	5.82307289890621e-08	significant
INTS5	1.65513250729348	0.115594756147752	non-significant
SIGIRR	1.62509431644848	0.139826985600853	non-significant
IFITM2	24.203109061552	5.4952991739221e-36	significant
PRMT3	2.83439747759269	0.040638135736493	significant
TMEM179B	5.68431666964567	9.83642847279465e-07	significant
IRF7	0.654858021025511	0.551057616883536	non-significant
PSMD13	6.86396763316881	3.86069357883233e-10	significant
ZBTB3	0.848040623234689	0.439694904400556	non-significant
CYP2R1	0.435223278548698	0.72814596245768	non-significant
BCL9L	1.84134795685089	0.0831640354997392	non-significant
KDM4D	0.682916222197136	0.609272532506314	non-significant
BACE1	2.2256470708394	0.0371735058169065	significant
ARAP1	3.31215466266456	0.00123614849957998	significant
ZFP91	0.865544774787699	0.39070577336373	non-significant
TMEM216	2.0620849312984	0.0825714285243173	non-significant
TEAD1	1.02583280604038	0.308102910600757	non-significant
C11orf96	2.94477405598542	0.208292240868556	non-significant
KCNJ11	1.43878893512556	0.199856409469564	non-significant
KCTD21	1.28691268023354	0.228028547367192	non-significant
FAM111B	2.18006621765772	0.0520148477336245	non-significant
ZBTB44	0.190423756199827	0.850668171199348	non-significant
TRAPPC4	7.29327047854542	8.63546832588349e-09	significant
ARHGEF12	2.45282351235862	0.0168207025146991	significant
PCNX3	0.97613397290828	0.403757906895033	non-significant
MRPL21	6.71215769112787	8.67443866182717e-10	significant
BCO2	0.822182895188145	0.416953827758798	non-significant
FAR1	0.197145670357229	0.845550805305689	non-significant
PARVA	1.60789010924301	0.111314594409108	non-significant
FAM118B	5.37759337858366	0.0002192668136207	significant
SVIP	0.757548939972892	0.452488419922175	non-significant
HYLS1	3.06869097876164	0.0158106899188375	significant
UVRAG	2.83812691946029	0.0106971259570196	significant
CTNND1	2.31054892508696	0.0226205173529064	significant
CTR9	1.04769355586184	0.302433412959526	non-significant
SDHD	8.73931090111042	9.96512317785996e-16	significant
UQCC3	2.60729401370024	0.0151243235351345	significant
LGR4	5.90229290606238	1.20089408668072e-08	significant
IPO7	2.78245410041826	0.00685359404082642	significant
NAP1L4	1.60583324615574	0.110705320986892	non-significant
SELENOH	4.11234558514751	8.94660029905067e-05	significant
ST13P5	8.43201107873769e-05	0.999940374018603	non-significant
SIPA1	0.437563594241886	0.692245910242054	non-significant
ARL2	5.52707332613276	2.68456144820689e-07	significant
TMX2	4.53204474919069	3.3521853712999e-05	significant
NDUFS3	7.86384268163307	1.22456258090472e-13	significant
MRPL23	11.317079209081	2.06957941870297e-20	significant
TSPAN4	1.59294883663563	0.117310023521627	non-significant
PPME1	2.67957521358622	0.0125026573430026	significant
STARD10	5.65560996008182	2.1036992045508e-07	significant
HNRNPUL2	3.09988838723215	0.00363733648825093	significant
FADS3	3.01033181498632	0.00420469011355567	significant
C1QTNF5	-0.00576753793715531	0.995698869565913	non-significant
RPS28P7	52.3187137478728	3.66952454912081e-206	significant
SRP14P2	23.3472810851627	1.95425864688757e-05	significant
FABP5P7	2.08491835693068	0.0914594706029775	non-significant
ZBED5	3.88866633925965	0.000199011928433235	significant
RBM14	2.19677998220403	0.0399628003410159	significant
RPL37P2	6.49648560470042	2.38884329563362e-08	significant
USP2-AS1	1.11931769461393	0.323630579206704	non-significant
MIR210HG	1.21594099230227	0.286360937095082	non-significant
ZBED5-AS1	1.79949425487293	0.0833662122876824	non-significant
RBM14-RBM4	6.22517066105088	7.37973448684008e-09	significant
CCDC153	0.694637790255199	0.55812503547506	non-significant
MALAT1	2.74172953749338	0.00827185992510094	significant
HSPB2-C11orf52	5.59488784085718	6.02176652089892e-08	significant
NAV2-AS2	1.64818177955484	0.10996659883256	non-significant
AP5B1	1.49913528662138	0.230693642889641	non-significant
EEF1G	31.0519959861973	3.65019167705661e-186	significant
TMEM9B-AS1	0.980371117813307	0.411591074270136	non-significant
SCARNA9	0.437703594838359	0.701421268042344	non-significant
DPP3	0.284396352833364	0.788041442032089	non-significant
FXYD6-FXYD2	9.90764148002029	2.87385684729082e-20	significant
MIR100HG	3.41390891960964	0.00130081690095303	significant
SNHG1	3.65684518956278	0.00195664226134433	significant
HMBS	2.06313550287074	0.0567755055020929	non-significant
SPON1	3.88993456419037	0.000141131488047935	significant
SRSF8	3.4595872729738	0.00259178248426652	significant
C11orf98	4.45511172251946	5.68432733179905e-05	significant
GSEC	1.52208694456546	0.199934167262827	non-significant

## Sheet: no_decision
gene	statistic	pval	marker
BAD	7.24157663917048	1.37471991365704e-08	significant
ZNF195	0.789464958816466	0.566691947485976	non-significant
TMEM132A	0.575329899423732	0.618168616536222	non-significant
USH1C	2.50045179800399	0.0647808335312243	non-significant
POLA2	3.23741650803554	0.00690378780844749	significant
CAPN1	4.72761047462559	2.9277615078317e-05	significant
PHLDB1	3.23577930823545	0.00256427032651719	significant
PRDM11	0.774138014664143	0.579766927283021	non-significant
SYT13	1.80170742983011	0.102110757293983	non-significant
PLEKHB1	1.06289965589137	0.369379759736263	non-significant
OSBPL5	1.1775402971323	0.331067615014099	non-significant
RNH1	7.55025270653283	9.93666921445319e-09	significant
CD44	-0.867864198375509	0.443782385234624	non-significant
NUP160	-0.0758711413295311	0.941881500501734	non-significant
GAB2	1.25471237322831	0.327452169714937	non-significant
USP2	1.6140333570901	0.122676493313804	non-significant
MED17	3.38049295407373	0.0036852515908478	significant
USP28	1.53025787058438	0.13590898333619	non-significant
RSF1	1.31900107080351	0.225602130387006	non-significant
RCN1	5.7184359017255	7.1184733897984e-06	significant
DKK3	8.08272456676636	1.11706463848403e-12	significant
TTC17	1.87146943117611	0.102480709985444	non-significant
KCNQ1	3.46329106153868	0.00298664852087176	significant
FAM168A	1.58475367470456	0.134528421054851	non-significant
QSER1	1.4509353692301	0.213810482547857	non-significant
SPA17	5.92408090248152	0.0398352198089922	significant
CDON	0.482263056061544	0.649931261440265	non-significant
MPPED2	4.23349113976351	0.000256816622588448	significant
RASGRP2	6.32892772257303	0.00690498833564007	significant
PPP2R5B	2.59076091266385	0.0424334308848302	significant
PYGM	2.39874519952566	0.0324857870405903	significant
PHRF1	-0.529555651133984	0.610810157937429	non-significant
NUCB2	2.53815623286413	0.0270318424415703	significant
MARK2	2.4857735974932	0.0243312857874661	significant
PICALM	2.01579372788796	0.0526720932095955	non-significant
CLNS1A	4.53848112629813	0.000184509619799094	significant
EED	5.56566518831546	1.75067685271943e-05	significant
TSG101	3.92670647102506	0.000604747630174866	significant
ACAT1	5.67428737622584	2.15709015215411e-06	significant
REXO2	8.76657614477304	2.24753444467503e-10	significant
RBM7	2.97269058087344	0.0179591051105529	significant
FAM76B	0.718450932940089	0.5850961977517	non-significant
POLD3	-0.181604798996331	0.868551383029607	non-significant
TOLLIP	1.00093660820129	0.328745311016553	non-significant
IGSF9B	1.761577184298	0.106640237027724	non-significant
GSTP1	28.0389259150947	4.24075196172787e-73	significant
APLP2	8.87417080771972	8.07446375016523e-16	significant
CD59	7.65470139220318	7.16021589381118e-12	significant
CD82	2.84930007496031	0.0425389362773104	significant
CTTN	1.62834591893377	0.111427676670799	non-significant
ZW10	1.41560459199763	0.21256803355208	non-significant
ALG9	2.05009675454487	0.0811385447673443	non-significant
MTMR2	0.610686572703745	0.556001015357403	non-significant
SF3B2	2.98213068426188	0.00503999930730335	significant
AAMDC	6.57352149808866	5.37852382236777e-10	significant
GANAB	3.3666401433699	0.00109118605386496	significant
ARCN1	1.04718775050177	0.308098501711422	non-significant
RASSF7	2.67458731756262	0.0196648670217661	significant
CRYAB	38.905047774117	5.84927576436239e-172	significant
CTSC	3.39602730319021	0.0234677635445236	significant
CCDC34	3.80023509591846	0.00192102387961445	significant
ZBTB16	3.49763423421804	0.0202438178595556	significant
ELP4	2.29760434774399	0.0450058881145889	significant
ZPR1	4.36459601623339	0.000422710818580567	significant
MTCH2	5.60595521593077	3.02100367543317e-07	significant
FNBP4	1.95955175995621	0.0674923499919884	non-significant
SC5D	3.68101842341255	0.00150779792999904	significant
HSPA8	14.4789730256954	1.55784675522188e-33	significant
VWA5A	2.19834658946584	0.0527208521731415	non-significant
DNAJC4	7.93949735585491	5.17188317694853e-08	significant
SIAE	0.523759492822179	0.622818508941754	non-significant
SNX15	1.6201693497341	0.145448755739127	non-significant
ATG2A	-0.14997004293451	0.884999265428681	non-significant
EHD1	2.38134083974497	0.0250695545627822	significant
OSBP	1.10346294003836	0.303932079365807	non-significant
DCPS	2.99265787913873	0.00815628876371888	significant
KMT5B	3.13815240997282	0.00579613629883561	significant
FOXRED1	2.53661917201815	0.0303676708422142	significant
PPP6R3	3.33067001550641	0.00268495286369861	significant
ST3GAL4	6.32643772761416	9.05228102923401e-08	significant
CPT1A	2.35571264410915	0.2426751711062	non-significant
CCND1	2.99486171228107	0.00498156542913635	significant
PRPF19	6.15851840838118	1.30975320511731e-07	significant
TMEM109	3.76339510938064	0.00134202538778394	significant
CHORDC1	3.7269867204515	0.00549572096479043	significant
ANAPC15	4.41359588946711	0.00688014355768725	significant
ARHGEF17	1.43021474738216	0.160156810187912	non-significant
RNF141	2.2680597013416	0.0586343374975864	non-significant
EIF4G2	7.96731834555833	7.32868912486435e-14	significant
GALNT18	7.64716155340725	2.30924889518364e-06	significant
BIRC2	3.53073900071273	0.00311157477703578	significant
UBE4A	1.86130192173626	0.0982541753586452	non-significant
DDX6	5.06844466456623	8.09594577778349e-05	significant
CBL	3.88864146820744	0.0047309027580864	significant
NECTIN1	2.80373140109904	0.0233582036830042	significant
HIPK3	3.38390475559622	0.00119524162537524	significant
FBXO3	6.33585930460122	3.29779299804183e-06	significant
PDHX	3.81989897892975	0.00141942207844772	significant
COMMD9	5.19758645086809	0.000184592008166223	significant
MDK	43.0317420163286	3.49215149789687e-197	significant
AMBRA1	4.58586649512004	7.31951104721265e-06	significant
MADD	0.104606847646948	0.920879936930985	non-significant
PTPMT1	6.15865566542304	2.94793348008709e-07	significant
NAA40	1.19138378426217	0.294389367743527	non-significant
SLC22A18	1.88681369736164	0.146760697089919	non-significant
CD81	19.9442307270468	2.80127161798035e-51	significant
C11orf21	-1.58121768754691	0.243623447207914	non-significant
SOX6	5.3820760026419	0.0544184741315225	non-significant
C11orf58	5.13179398633393	3.29732810652181e-06	significant
PITPNM1	2.30130297493774	0.0632126548658134	non-significant
RPS13	34.0792886992871	6.66484715279811e-109	significant
AIP	6.11480306676514	1.70590747397598e-06	significant
NUP98	1.87509409819273	0.113557773783749	non-significant
NDUFS8	14.5053909288966	8.34984370065803e-24	significant
CHKA	1.72441798322445	0.13043301417467	non-significant
GTF2H1	1.09401240477544	0.318085021545225	non-significant
CTSD	11.2063134894411	5.87558541278572e-20	significant
KMT2A	0.37085290769788	0.769113945597984	non-significant
IFT46	0.835662427122248	0.453688257808918	non-significant
APOA1	1.23630670823047	0.260044106124311	non-significant
RPS25	46.454413872833	4.32185423983718e-133	significant
SPCS2	8.17657006735486	2.34476788864694e-11	significant
USP35	3.08281484050905	0.0390235925592794	significant
SNX19	4.35031340083675	0.00507794322690658	significant
KCNJ5	3.39539304791635	0.00158854656200503	significant
MSANTD2	1.67526823773212	0.214256611782198	non-significant
MAPK8IP1	1.99751790136373	0.0713544368794323	non-significant
CRY2	2.30416704235301	0.0299934192057262	significant
PEX16	1.29545818449693	0.257094002286345	non-significant
CAT	1.95509257594461	0.0920017735412332	non-significant
KBTBD4	1.16917084728528	0.272570440477198	non-significant
MYRF	2.38562552196725	0.0515998732988203	non-significant
AHNAK	3.79822608182481	0.000205256848983412	significant
FRMD8	2.0506871691363	0.109600648524923	non-significant
PRDX5	20.5874597002917	1.51564097068303e-40	significant
COPB1	3.77287697370712	0.000924876619878078	significant
PSMA1	3.77192237261318	0.000596155180384754	significant
SERGEF	10.1296559930515	0.00186806632228651	significant
CSRP3	23.2709904639506	3.97969585749499e-89	significant
E2F8	0.820207669403091	0.531960323838508	non-significant
CDKN1C	1.75188761759893	0.151256627633969	non-significant
STK33	1.45072059378406	0.204349543339029	non-significant
H19	10.4559814108502	1.24887246462951e-19	significant
PPFIA1	0.318104934377255	0.766858912971281	non-significant
TRIM21	0.19289950014627	0.857514523119853	non-significant
ARFIP2	2.07938798427571	0.0641384622192926	non-significant
RRP8	1.98214210653934	0.0695472937101409	non-significant
TIMM10B	2.09361781267291	0.0729969394149473	non-significant
IGHMBP2	0.16350257129762	0.878042365231758	non-significant
MACROD1	10.10714984646	5.67733616716366e-11	significant
WDR74	13.7220205695893	1.25146280575651e-11	significant
RTN3	6.94819176693904	1.60676012320636e-09	significant
SWAP70	1.80644412325056	0.163242815080085	non-significant
SBF2	1.62611122004581	0.159976431106203	non-significant
MICAL2	3.31904629414898	0.00263036603365323	significant
RRAS2	1.33719176920043	0.224722785085504	non-significant
DPF2	2.3752207672543	0.0289590481655396	significant
LDHA	8.91493613993948	4.56165204655567e-13	significant
MYBPC3	14.3751467553828	3.92731017309001e-41	significant
DDB2	1.21414816982738	0.339801824970297	non-significant
ACP2	2.80444150945986	0.0109464733251638	significant
TIMM10	7.15689670799262	3.44693138412632e-07	significant
FADS2	4.02826382477922	0.000412978428763367	significant
TMEM258	20.1700625562815	3.20336631269923e-42	significant
ARHGAP32	3.49150920179152	0.0304803906705747	significant
STT3A	4.42106293081873	0.000228534120558602	significant
ADAMTS8	1.61968907532862	0.139990789474474	non-significant
ETS1	0.240404899287576	0.830072076910808	non-significant
PHF21A	1.84311678943977	0.0890952496626132	non-significant
NAT10	-0.0715983004211073	0.944324815148478	non-significant
CAPRIN1	3.36164518218318	0.00185145897482324	significant
FCHSD2	1.07733156857495	0.319866155758883	non-significant
THAP12	1.71423991090787	0.10678280643663	non-significant
NUMA1	4.52290719129809	5.80866881918562e-05	significant
CCDC90B	3.18454107995163	0.00598897201047507	significant
SYTL2	0.48332648912342	0.646207766147502	non-significant
CREBZF	2.2101097070196	0.0440184203623376	significant
PRCP	0.138635469162447	0.896021080820832	non-significant
NARS2	3.66938497404344	0.044239685260443	significant
RNF121	2.73905149987129	0.0111378078234506	significant
BUD13	6.9275592647875	0.000369252164642174	significant
DCUN1D5	8.97309006521066	5.37492393762122e-10	significant
YAP1	3.13125558141606	0.00340086215626567	significant
SLC37A4	2.29888468201059	0.085494203667108	non-significant
RDX	2.02315958220668	0.057600789235678	non-significant
PPP2R1B	0.489339064927585	0.650862000377374	non-significant
FDX1	4.76441006939585	7.7278496552225e-05	significant
C11orf1	1.96310311416474	0.141771419417139	non-significant
FXYD6	8.26299024685227	4.04110559512741e-13	significant
ARHGAP20	0.921003628130432	0.522666338807506	non-significant
SIRT3	1.32026200831235	0.246333313943729	non-significant
IFITM3	19.1310769681863	5.2182647402412e-22	significant
SCYL1	4.91781709464441	2.12254352239392e-05	significant
CDCA5	2.33419495232002	0.0579015056504624	non-significant
BTBD10	2.11219585875224	0.0491784603487547	significant
GAS2	1.42423748283269	0.385107980640957	non-significant
LIN7C	0.265548370950995	0.797302225115816	non-significant
IMMP1L	2.89015897574962	0.00615207650762072	significant
PGAP2	5.17575154160699	0.00780510375699869	significant
TUT1	1.09029576611832	0.350920619906729	non-significant
HSD17B12	4.01009249345773	0.000502938720447054	significant
APIP	2.67011113711709	0.0393280246082451	significant
DGKZ	2.642312221957	0.0145977234529481	significant
EIF3M	7.0984095219922	3.8790598806817e-10	significant
TNKS1BP1	2.56106659725368	0.0584154039223978	non-significant
SSRP1	3.37710105233168	0.00323081740144885	significant
ARFGAP2	4.73105366542484	7.58590553231824e-05	significant
CELF1	2.13816725973018	0.0520138929605049	non-significant
HIKESHI	7.29214414795065	1.15750783075868e-07	significant
SESN3	1.18014632977828	0.337601121064373	non-significant
CCDC82	-0.016069738257609	0.987595774621863	non-significant
SERPINH1	8.38546213284667	1.10672090015857e-13	significant
INTS4	12.1348767959573	1.03524472439651e-07	significant
PAK1	4.73967852803971	0.0168577419519704	significant
RPS3	28.4454360556541	7.15863499188681e-103	significant
ZC3H12C	1.59975652972766	0.202429401904496	non-significant
NCAM1	7.05868554475714	1.17970218052832e-10	significant
ATM	-0.63546035336599	0.560617331881997	non-significant
AASDHPPT	5.88014518550971	1.10572456563199e-06	significant
LAMTOR1	3.09170517983907	0.00447482711465352	significant
HYOU1	0.27618096056527	0.787247676926838	non-significant
MTA2	-0.3705898693033	0.718006132395255	non-significant
FADS1	3.94775562621627	0.000773873130387971	significant
CPSF7	0.336541781131271	0.741057459836491	non-significant
B3GAT3	6.05507240522228	9.16027152355649e-06	significant
EI24	3.25468437073652	0.00410485760164836	significant
CHEK1	1.75214746017712	0.162957774034017	non-significant
FEZ1	1.70658008147138	0.187005893964619	non-significant
SCN2B	0.0802523573761564	0.937369207927203	non-significant
SIDT2	1.34537926766696	0.227125936001605	non-significant
TMEM25	0.706394969183636	0.504297992312413	non-significant
TAGLN	11.4442101304684	6.23744276345529e-24	significant
TRPT1	9.04853259475423	8.93727095389674e-10	significant
NUDT22	8.58608983388402	2.60136933607837e-09	significant
PLCB3	-0.0621007208605019	0.954876037844456	non-significant
MRPL49	7.09490118063417	2.22246362073275e-06	significant
FAU	98.5772426313496	0	significant
TM7SF2	3.60943450182209	0.00136091148086178	significant
VPS51	2.228896787529	0.0420105436051238	significant
CWC15	10.3254541481886	2.77900685478473e-16	significant
TMEM218	16.7752357625151	0.000381572677872257	significant
PRSS23	1.73000712953465	0.168368091329377	non-significant
DIXDC1	0.814558262628146	0.42334819984587	non-significant
DLAT	5.24650330118182	9.30811093874079e-06	significant
NKAPD1	1.65172988302938	0.192151706763264	non-significant
TIMM8B	5.74465755200631	1.57891488220502e-07	significant
PTS	1.05119921341802	0.351294290129137	non-significant
UEVLD	1.94779141833122	0.29159592042056	non-significant
EXT2	2.74967075852665	0.01759083945841	significant
NDUFC2	17.170948403149	4.44709662973417e-26	significant
ME3	1.02126245925001	0.473826150702922	non-significant
ACAD8	1.87125023810367	0.0813614759528966	non-significant
THYN1	5.84324333064097	0.000151328102702555	significant
VPS26B	3.1624041992431	0.0105690077821485	significant
NCAPD3	2.51450806314939	0.0255865081836272	significant
ARL14EP	2.08483093784816	0.0489472778731374	significant
PDE3B	0.921474472915671	0.472345561078292	non-significant
GUCY1A2	1.3392500091394	0.193758301236776	non-significant
TMEM123	4.78587969697881	2.75198281164153e-05	significant
TBCEL	1.84214252825539	0.100889257354385	non-significant
TBRG1	1.77171024438324	0.121304067145905	non-significant
UBE2L6	5.16853085960881	0.000136422421150564	significant
ZDHHC5	0.917437643584228	0.381559184981375	non-significant
MED19	2.61655561549148	0.0896994915863299	non-significant
TSPAN18	1.76555371804536	0.116454374667963	non-significant
MRPL17	1.37586184666958	0.196111306349258	non-significant
EMSY	0.41725979677059	0.684421654412981	non-significant
ALG8	1.37686931834565	0.208244694579435	non-significant
SIK3	1.42526686510304	0.181261174120339	non-significant
PCSK7	1.55732864905719	0.150295458421503	non-significant
VPS11	1.38868099504122	0.253711198241467	non-significant
NLRX1	0.461050654942232	0.724102856819143	non-significant
NEU3	1.28925775818835	0.274271712133051	non-significant
CYB561A3	1.48488318096321	0.338870245345726	non-significant
ASRGL1	1.10703880927537	0.382649645443379	non-significant
UBXN1	3.10280238572728	0.00788756957531223	significant
LBHD1	4.14075358288359	0.0016831888448484	significant
TTC9C	0.765532298826224	0.576583293196609	non-significant
TAF6L	0.467798050013438	0.667222553289634	non-significant
NXF1	3.46773367897845	0.0020409714915867	significant
STX5	3.34969528025371	0.0307409586215938	significant
SYVN1	26.5509732942813	1.42350818179827e-109	significant
ZFPL1	4.42025518411081	0.0011751682030227	significant
RPS6KA4	1.2064052544515	0.270305952864491	non-significant
LRP5	-0.356722354681437	0.730345222990022	non-significant
TPCN2	-1.20553829456968	0.33670460130822	non-significant
FAT3	1.63925055631628	0.140317340011669	non-significant
INPPL1	2.16072804201378	0.0358857742589624	significant
PCF11	0.572716443809993	0.606293029992801	non-significant
RPUSD4	5.83627045576901	0.00111000323722876	significant
ARHGAP42	0.631015867641257	0.639825937413496	non-significant
PACSIN3	7.63604845908657	1.81005244772957e-10	significant
SLC39A13	3.70745169886693	0.00138757981778059	significant
PSMC3	12.466841833555	4.91460550521851e-24	significant
CEP295	0.59981845697365	0.623394823310748	non-significant
TAF1D	1.92933906752996	0.115084342018734	non-significant
ABTB2	0.534578392690157	0.636307397738731	non-significant
AMOTL1	2.92865770134534	0.0150486592831787	significant
CEP57	1.59913954717022	0.140387949279643	non-significant
JAM3	1.51588543221943	0.21666075710744	non-significant
ADAMTS15	-1.06987031081277	0.316480743064084	non-significant
SPATA19	2.75403319391583	0.218617484138563	non-significant
API5	1.72311785714378	0.107369025492236	non-significant
ALKBH3	0.819041758341031	0.442389921370052	non-significant
CUL5	-0.0322046626769459	0.974834450071729	non-significant
SMPD1	3.51009167033869	0.0033317775577978	significant
APBB1	5.89213524812876	2.15657042090196e-07	significant
TRIM44	1.73236490954458	0.0967716430150419	non-significant
ILK	8.45149275064376	3.77254069548717e-12	significant
TAF10	3.4360301697254	0.00150887315583215	significant
TPP1	1.12856429741009	0.336796149689548	non-significant
DCHS1	2.48723361593316	0.0368892855281668	significant
TUB	0.936725796314979	0.424085201501935	non-significant
XRRA1	0.878745767166843	0.468575193931714	non-significant
RNF169	-0.335549990886429	0.748424583560317	non-significant
RPL27A	50.2192326662028	6.73127271528647e-314	significant
AKIP1	8.08869585443587	2.60265933417959e-07	significant
TMEM41B	0.284811746374082	0.779580663513798	non-significant
ZNF143	4.13177068683266	0.00152334533436821	significant
WEE1	5.94765768085532	7.17720352054049e-08	significant
TMEM135	3.36883535421854	0.0201399175312093	significant
PLEKHA7	6.33526521679916	5.04125143494257e-10	significant
FAM111A	0.176784923150244	0.866574198746709	non-significant
NAV2	1.27680466245954	0.224241535497772	non-significant
PATL1	0.57248472856482	0.585758260387904	non-significant
STX3	2.48667096662707	0.175042227795545	non-significant
MRPL16	5.6359173234558	3.2630790439962e-06	significant
IGF2	3.02367193934083	0.00487539250845516	significant
RNF214	0.924035558775253	0.439397011707364	non-significant
ATP5MG	14.8164617893473	2.23761201142673e-34	significant
STIM1	3.13815288382608	0.00754978644691232	significant
RRM1	2.50261688887602	0.0191609145888608	significant
OTUB1	6.4599258534078	3.1624440666285e-05	significant
RCOR2	6.18776245849705	2.6077716102952e-05	significant
NDUFV1	9.55904138099813	6.15928723964435e-14	significant
CDK2AP2	10.3492644912587	1.07288886378785e-08	significant
NUDT8	5.99205033880319	0.00360406974757203	significant
SDHAF2	7.44442997666815	2.0137496957901e-09	significant
DDB1	5.05857283911269	2.98232665762067e-06	significant
VPS37C	2.17941089556706	0.077662342158027	non-significant
RAB3IL1	5.46899800666203	0.000985489852531333	significant
FTH1	39.8960966906628	4.21509813183721e-174	significant
BSCL2	0.27815381748136	0.790254133963089	non-significant
POLR2G	9.70063797578903	2.39297412604969e-15	significant
SLC3A2	2.17863628643054	0.0446436826936251	significant
SPINDOC	2.32600153087697	0.0407390188694844	significant
C2CD3	3.69134340076085	0.0775661339825244	non-significant
FADD	2.35071713661899	0.0504907763972795	non-significant
LTBP3	3.64179961230496	0.00112976368005354	significant
SAC3D1	5.6727714366151	5.23154109203377e-06	significant
SF1	2.84632533294345	0.00753723170579744	significant
PAFAH1B2	1.78416434533486	0.0906994956451566	non-significant
STIP1	1.7577475577745	0.0878315800911951	non-significant
FEN1	2.04792220558171	0.0732529023889519	non-significant
TMEM223	1.35400319683531	0.182705171300698	non-significant
ANKRD49	2.09213069828526	0.0902344925572534	non-significant
SIK2	1.41910395579804	0.209462176133551	non-significant
USP47	2.37167888230395	0.0380244794222258	significant
HSPB2	17.9970744817956	3.28770163129473e-31	significant
NFRKB	1.34471281173689	0.219463621396568	non-significant
PRDM10	0.0770897480024473	0.948029455228086	non-significant
MSANTD4	4.34580930412343	0.00830241391199696	significant
DNAJC24	2.94316846637682	0.048166303678194	significant
CAVIN3	9.39472706948684	5.336164109798e-09	significant
PDGFD	3.37727364754942	0.00249450067817044	significant
C11orf24	1.3020178377727	0.402635261796418	non-significant
TMEM126A	2.04518764074521	0.0557139825632914	non-significant
TMEM126B	8.73551760343334	1.08644271130799e-11	significant
MAP6	0.393751202333482	0.758106220073672	non-significant
ANO5	1.41669261113109	0.179514176917266	non-significant
DPAGT1	0.595170827923586	0.590559905906656	non-significant
HINFP	1.15234531488171	0.349239112015232	non-significant
C2CD2L	2.33724139456333	0.0823251511788883	non-significant
CLP1	18.6870264801472	0.00125468405737673	significant
FIBP	5.40953370425495	3.69265994657612e-05	significant
PPP1CA	6.79635357321623	4.69082245743994e-09	significant
RAD9A	1.15376600064184	0.365193987188929	non-significant
EFEMP2	9.52756425558722	3.23727969331601e-15	significant
TMEM134	12.6998030809764	8.39045903815756e-12	significant
CORO1B	0.91088844789884	0.422109930137831	non-significant
MUS81	2.87868385255533	0.019480174933468	significant
CFL1	12.8106940537766	3.3638867164776e-28	significant
SSH3	1.06538795226285	0.459539172427751	non-significant
NADSYN1	0.132922958257835	0.898319269501117	non-significant
DHCR7	2.04078324630208	0.058369610725855	non-significant
RNASEH2C	2.19623429288501	0.0635690462807749	non-significant
ANKRD13D	1.45160875423735	0.208495874387661	non-significant
KAT5	3.30994758715914	0.00413712123094236	significant
GRK2	0.89337553967084	0.387545564699179	non-significant
RELA	4.62837730435558	6.80484807161449e-05	significant
TRMT112	17.8191399008136	4.52241808012289e-25	significant
KDM2A	1.04191354645366	0.346320323473207	non-significant
ESRRA	5.88202926586229	1.40669318121329e-07	significant
RHOD	6.02765375608356	0.000453693177835484	significant
GPR137	8.12326534652989	0.000373229592457841	significant
MAP3K11	3.03575825000628	0.0178504966239735	significant
RNF26	1.24057149676377	0.275060593942086	non-significant
PPP1R14B	6.63577714094481	2.2699695237135e-07	significant
FKBP2	8.52645397432853	1.75991590235543e-13	significant
VEGFB	9.0309342591683	3.169002454214e-13	significant
LRFN4	0.330958810810434	0.749180193471768	non-significant
RBM4B	1.35249157047145	0.229724769338611	non-significant
RBM4	3.09094857272405	0.00727910011303644	significant
CCS	3.06887854126688	0.0177407832923835	significant
CTSF	3.12338345179775	0.0124919070540725	significant
ZNHIT2	7.61887677578361	1.03625959016245e-05	significant
BBS1	0.427264300889847	0.707558069611246	non-significant
MRPL11	12.6670557999985	2.45861854738121e-12	significant
SLC29A2	1.17912065748694	0.315051243739624	non-significant
B4GAT1	10.8318973914662	4.85964721135103e-12	significant
BRMS1	4.81862632169837	0.000173850423790668	significant
HRAS	6.52308101336924	5.34646553507987e-08	significant
YIF1A	2.25251051805097	0.0464267993528694	significant
RAB1B	6.49256850450767	1.32516629229815e-08	significant
PTDSS2	2.59288573509318	0.020537806558465	significant
KLC2	1.25938241593504	0.246956691330109	non-significant
TRAF6	1.06499388822351	0.33755423866184	non-significant
PACS1	2.45138267972175	0.0176106588375219	significant
CKAP5	2.39194066714299	0.0232865487470615	significant
ARHGAP1	0.850581053127588	0.403136286532121	non-significant
ATG13	1.13550198194928	0.280205195989725	non-significant
GAL3ST3	0.125637853066768	0.908361472768467	non-significant
TP53I11	3.20293225448029	0.00351833387566171	significant
BANF1	24.1035257690104	4.20503583910232e-46	significant
TMEM9B	2.00881930551699	0.0704725332242258	non-significant
EIF1AD	2.14202641023582	0.156135993199647	non-significant
EIF3F	7.14648143073894	3.82983144062225e-10	significant
SART1	2.92885083620873	0.018573705202015	significant
POLD4	2.2892165210643	0.0395385305415756	significant
DRAP1	6.34910846429743	3.46779852719763e-07	significant
UCP2	0.38184175791658	0.767479056936507	non-significant
C11orf68	6.78814885714532	5.50803543213246e-06	significant
PAAF1	7.308523541917	7.42209732220257e-05	significant
MRPL48	19.4464602586509	1.14174539764742e-16	significant
RAB6A	3.8817406058467	0.000437024146144063	significant
CCDC85B	6.68376250437347	1.96737736504115e-07	significant
RPS6KB2	2.7953482628347	0.00912210424541959	significant
CSTF3	2.46120502436767	0.046115885872863	significant
COX8A	41.5911647737568	1.98815176087662e-87	significant
FAM89B	4.42460843999271	7.00571711580428e-05	significant
DEAF1	5.27842078953741	1.56966478033875e-05	significant
TMEM80	2.93386283240139	0.0146428137437582	significant
ZDHHC13	3.5380778556761	0.0466844863623809	significant
SCN4B	0.138757674356598	0.910424849189074	non-significant
RHOG	0.154677094938133	0.901520482790924	non-significant
TALDO1	11.3442045134928	9.36579147014205e-17	significant
GATD1	3.92303425902267	0.00133883516670511	significant
PIDD1	0.769226453714685	0.476673556285484	non-significant
RPLP2	99.8102498980337	0	significant
PNPLA2	6.27118987983467	1.94449604494914e-07	significant
CD151	16.6039814921752	2.24499606451228e-34	significant
POLR2L	14.3380461347701	2.14511600318058e-28	significant
CHID1	4.48241413404477	5.48271272638342e-05	significant
BET1L	2.89422782759107	0.00795961717946367	significant
RIC8A	3.55209218732948	0.0016144769335941	significant
SPTY2D1	0.921168517953585	0.397807732693884	non-significant
FJX1	6.76691434396086	0.00245773688543545	significant
C11orf71	0.501430762454113	0.633944797742971	non-significant
SLC36A4	1.91952155612935	0.0967957088664917	non-significant
SLC35C1	-0.0681859961208242	0.946790871298796	non-significant
COA4	9.0026670486352	1.34435454684063e-06	significant
MOB2	4.96163916797477	3.12519530349403e-05	significant
C11orf54	1.19008730754985	0.247150259736791	non-significant
SRPRA	1.38559369297929	0.184172831011965	non-significant
CADM1	2.74719882728721	0.0140065881062767	significant
AP2A2	2.81234099198821	0.0114722744075934	significant
FANCF	2.72674784178743	0.0251149087241404	significant
WT1-AS	0.00159445375122248	0.998825327492103	non-significant
JRKL	3.26802142374073	0.0474981345292053	significant
DENND5A	3.7293618689923	0.000410145437234093	significant
LRTOMT	0.592729687003364	0.62653770457197	non-significant
TSSC4	4.67751981108108	0.000165942993784133	significant
MAML2	-0.0737600443723827	0.945305636718629	non-significant
CEND1	2.8507694858603	0.214574935089554	non-significant
DUSP8	5.95094371823654	9.9506171953852e-06	significant
WT1	6.20225182470983	3.48419596766692e-07	significant
INTS5	7.76978599829277	1.39568595767634e-06	significant
SIGIRR	1.17983628965011	0.437124471552147	non-significant
IFITM2	12.3148892393403	1.76235788962593e-07	significant
TMEM179B	3.43180978469717	0.00355492115890271	significant
PSMD13	11.4101950638019	3.02539917505671e-19	significant
ZBTB3	1.07038525744508	0.344925473366867	non-significant
BCL9L	2.77280672818166	0.0204118193139754	significant
BACE1	5.7304121936641	9.73895541527526e-05	significant
ARAP1	3.87983332760178	0.000232286232932831	significant
ZFP91	1.28877512338613	0.229041119127958	non-significant
TMEM216	2.20296672647231	0.111976793900892	non-significant
TEAD1	3.1131170061644	0.00332702633708838	significant
KCNJ11	0.703681687100859	0.545223309313875	non-significant
KCTD21	0.506539295504196	0.631059996126647	non-significant
FAM111B	1.75013544577788	0.182913516268761	non-significant
ZBTB44	0.602030043472931	0.571895676494015	non-significant
TRAPPC4	21.7258018937393	6.95371026695628e-18	significant
ARHGEF12	3.47741538583859	0.00188475397130366	significant
PCNX3	0.97613397290828	0.403757906895033	non-significant
MRPL21	10.4200932232263	2.81274747707328e-11	significant
BCO2	1.0231990285209	0.320227172765432	non-significant
FAR1	0.847553395551279	0.406474395173405	non-significant
PARVA	1.59749727846192	0.130697845334531	non-significant
FAM118B	4.44928151278812	0.00494890104552942	significant
SVIP	0.515467750522259	0.620580704050385	non-significant
HYLS1	1.88564485172219	0.308141084580816	non-significant
UVRAG	2.56585129260416	0.0297249242159423	significant
CTNND1	2.83608446750755	0.00678854092238919	significant
CTR9	1.67652413434566	0.119277258800157	non-significant
SDHD	8.50844703374051	8.20477935322691e-12	significant
UQCC3	2.70833223312607	0.0268091481744838	significant
LGR4	5.3369105769668	6.04464783196257e-07	significant
IPO7	2.33932819984602	0.0275032792102967	significant
NAP1L4	4.61359218303147	2.89982729397979e-05	significant
SELENOH	2.94082461964644	0.00574200937121837	significant
SIPA1	0.784896626139097	0.495966760603386	non-significant
ARL2	7.08556301411981	2.76425587557984e-07	significant
TMX2	4.85961807132284	5.36472574178603e-05	significant
NDUFS3	15.848616651473	7.29254490537603e-35	significant
MRPL23	11.8822035528964	2.08387593197067e-21	significant
TSPAN4	2.76000160045923	0.00964004330035323	significant
PPME1	13.1541772404167	2.78699321669213e-11	significant
STARD10	6.15628563845018	3.96459989247181e-08	significant
HNRNPUL2	3.26319524703299	0.00290617001696355	significant
FADS3	4.51903278290211	0.000105630140706806	significant
RPS28P7	45.9748437326094	6.37382745639597e-73	significant
ZBED5	3.3881716718004	0.00278393935613423	significant
RBM14	2.71079334733715	0.021873708048999	significant
RPL37P2	3.64108163420993	0.00148024946250734	significant
USP2-AS1	3.02098103950232	0.0307106140217283	significant
MIR210HG	3.23803670562963	0.177581828888157	non-significant
ZBED5-AS1	1.95543060289153	0.0752797700365326	non-significant
RBM14-RBM4	4.26536099424704	0.000382084750914879	significant
MALAT1	3.06193430593505	0.00351812227330441	significant
HSPB2-C11orf52	16.0743201059625	6.66219856144333e-27	significant
NAV2-AS2	1.82514538416457	0.0911987318183218	non-significant
AP5B1	135.916251819222	0.00405321195333081	significant
EEF1G	28.2399384950833	1.45326892671503e-117	significant
FXYD6-FXYD2	8.26299024685227	4.04110559512741e-13	significant
MIR100HG	3.23533764013218	0.00584968513079322	significant
SNHG1	3.90256297880439	0.00337513709861121	significant
HMBS	2.12031558637189	0.0851836766815588	non-significant
SPON1	4.29112845474782	6.44142617970991e-05	significant
SRSF8	1.79445990519015	0.0988456436037046	non-significant
C11orf98	4.14075358288359	0.0016831888448484	significant
GSEC	1.73776904753837	0.221944634046491	non-significant

## Sheet: stop_receiving
gene	statistic	pval	marker
BAD	13.2838071501897	2.96508173166689e-18	significant
ZNF195	1.07056325657335	0.466931355416892	non-significant
TMEM132A	0.877676232039548	0.422521939701291	non-significant
USH1C	6.0155293301614	6.16390168428784e-05	significant
PIK3C2A	-0.256699673773775	0.807141561282132	non-significant
POLA2	0.0108220340687042	0.991848818587226	non-significant
CAPN1	7.54565806199965	3.63006109066873e-09	significant
PHLDB1	0.0660630911910472	0.950902415483067	non-significant
PRDM11	1.965740836084	0.106513878590062	non-significant
SYT13	-0.63325673964157	0.547597924464674	non-significant
PLEKHB1	3.47299144995574	0.0487516109169812	significant
OSBPL5	0.420644231054646	0.706868579022315	non-significant
RNH1	9.90209517126266	1.23644630284042e-12	significant
NUP160	-0.0665968843335941	0.948202767754967	non-significant
USP2	1.28668233431576	0.284910710243209	non-significant
MED17	3.12608154816724	0.00828214799713366	significant
USP28	1.94306280162795	0.0601699503304972	non-significant
RSF1	0.0224032578508415	0.982432214456481	non-significant
RCN1	4.38197255922768	0.000230993193725284	significant
DKK3	8.07742193762211	1.479531625965e-13	significant
TTC17	1.77933385179588	0.103056141782812	non-significant
KCNQ1	1.5461016904196	0.146798430758485	non-significant
FAM168A	1.88669304668608	0.123274783600451	non-significant
QSER1	0.78611512261024	0.480902619478368	non-significant
SPA17	1.33169255217842	0.21454359429462	non-significant
MPPED2	1.45893417196293	0.15599162938658	non-significant
RASGRP2	5.75618981982876	0.0266996405235733	significant
PYGM	2.03687612179353	0.0677998245576206	non-significant
PHRF1	-1.0276959653409	0.43156463255879	non-significant
NUCB2	5.10149096831601	5.82608026349485e-05	significant
PICALM	2.0748933333447	0.0487571330126694	significant
CLNS1A	7.12028206985915	5.75685117303584e-08	significant
EED	8.14586183475832	9.77547437030102e-07	significant
TSG101	10.3873611352559	2.90182720414029e-16	significant
ACAT1	10.6774383341977	9.6728869070463e-19	significant
REXO2	10.8629664322481	2.27260445131991e-13	significant
RBM7	4.06887465060134	0.000998003090698808	significant
POLD3	3.56255913404056	0.117503125894195	non-significant
TOLLIP	0.765750317147851	0.455194234090492	non-significant
IGSF9B	0.945627836515247	0.425951082200187	non-significant
PGR	1.98505504398357	0.17520447498376	non-significant
GSTP1	34.8913377027924	9.28920051086745e-89	significant
APLP2	11.3696293362993	8.78873673230491e-23	significant
CD59	9.40329810489955	1.32333339825257e-16	significant
CTTN	-0.797366207917017	0.447973390428739	non-significant
ALG9	0.916950439741063	0.384548017395735	non-significant
MTMR2	4.27124527156587	0.000297939392263209	significant
SF3B2	4.28765412483541	0.00025913038248053	significant
AAMDC	2.84990849863512	0.00765340720791354	significant
GANAB	2.65946783499412	0.0271915928895201	significant
ARCN1	2.24704009775468	0.0349098139018379	significant
RASSF7	0.604134307255289	0.648933743788612	non-significant
CRYAB	80.6907949083726	0	significant
CTSC	10.4593478445559	8.93264620197469e-07	significant
CCDC34	8.43593030964204	3.38678827019245e-11	significant
ELP4	1.45067851941565	0.171030105668375	non-significant
ZPR1	3.48826945788264	0.00604171216228422	significant
MTCH2	5.6528735087913	3.59712768873913e-07	significant
FNBP4	1.00677978894039	0.338606966951124	non-significant
SC5D	2.64507723790267	0.0152753499152498	significant
HSPA8	19.1957443992632	2.83323236023286e-64	significant
VWA5A	2.7116009429473	0.0730072408263231	non-significant
DNAJC4	5.83827373691903	3.0290116070807e-06	significant
SIAE	2.19945822686648	0.158826760351586	non-significant
SNX15	2.81565404223826	0.0120953732410203	significant
EHD1	3.24194568265079	0.00787941976503083	significant
OSBP	1.31845910858542	0.213387167617292	non-significant
PUS3	1.78385115809894	0.165907228501621	non-significant
DCPS	3.35546838757695	0.00932731534641119	significant
KMT5B	2.19359393087079	0.0446314481980167	significant
FOXRED1	3.26579816787579	0.0470652247475549	significant
PPP6R3	2.75846972606455	0.0152063058652665	significant
ST3GAL4	4.73820221770547	0.00144202494097667	significant
CPT1A	1.97260468992541	0.233568505016636	non-significant
CCND1	1.1341395038625	0.317097034204666	non-significant
CCDC86	2.3290182916931	0.0546453215068487	non-significant
PRPF19	1.11200862325691	0.376126525646585	non-significant
TMEM109	5.29612813872511	3.99170344634606e-06	significant
CHORDC1	2.1860811770014	0.0833159321450052	non-significant
ANAPC15	1.86794940144484	0.0870236329795239	non-significant
PANX1	1.63976813996539	0.319699540456997	non-significant
ARHGEF17	2.1682745203001	0.0443500520213508	significant
RNF141	0.727624285250788	0.538270550282933	non-significant
EIF4G2	8.85333123566143	8.29661876632297e-17	significant
BIRC2	2.20747748483345	0.0615636243793961	non-significant
UBE4A	-0.946413237081668	0.362360656838842	non-significant
DDX6	2.85104145912595	0.0109355565856888	significant
NECTIN1	0.980232910294522	0.361991261773488	non-significant
HIPK3	1.79066990282187	0.0804157291264235	non-significant
FBXO3	7.10714251230934	3.90158543091921e-08	significant
PDHX	6.59977442663225	1.30999142755124e-07	significant
COMMD9	7.88002276265449	4.62680396363781e-09	significant
MDK	57.5451944637514	2.4125639955783e-272	significant
AMBRA1	6.49769887324232	6.600889440269e-10	significant
PTPMT1	2.31173195934618	0.03128817145033	significant
NAA40	0.422767816908335	0.696280096673832	non-significant
SLC22A18	2.78118316235979	0.0187397003415061	significant
CD81	25.7214532175464	5.41067359127477e-75	significant
SOX6	0.599311372175716	0.599316860489905	non-significant
C11orf58	11.218680890175	2.80407730466089e-22	significant
RPS13	95.5325236774529	0	significant
AIP	7.75965634508318	1.92221299513152e-06	significant
NUP98	1.97721230718806	0.0793259653870225	non-significant
NDUFS8	30.8978534004791	8.64174270796951e-84	significant
HPS5	11.5685959187164	4.47690640962227e-07	significant
GTF2H1	2.48980991008935	0.0356392930316716	significant
CTSD	8.91098032898839	1.69231528371035e-09	significant
IFT46	2.24537705567203	0.0639956574882686	non-significant
APOA1	7.07663300854716	1.29312281005137e-06	significant
RPS25	127.766258078552	0	significant
SPCS2	11.2904045817617	2.68599425881193e-19	significant
USP35	0.95186704580986	0.403943331428961	non-significant
SNX19	0.423097941170443	0.707339989110255	non-significant
KCNJ5	0.762518923412149	0.452696831834053	non-significant
MSANTD2	2.5286725419924	0.0653128855382979	non-significant
KIF18A	0.599053961519415	0.596787282577394	non-significant
MAPK8IP1	-1.58192616275363	0.186658887128223	non-significant
CRY2	2.01525004302229	0.0717782283843614	non-significant
CAT	3.35884405177204	0.00927833978851706	significant
KBTBD4	0.398152819085463	0.707281052216393	non-significant
MYRF	1.34077137253138	0.259674378656395	non-significant
AHNAK	2.63020393399854	0.00943942806825332	significant
FRMD8	0.807928552336927	0.554699388202482	non-significant
PRDX5	37.295183154099	7.0321886903174e-110	significant
COPB1	4.82892143988278	1.97341394901485e-05	significant
PSMA1	7.30365969283842	1.94997189776717e-10	significant
SERGEF	8.36793483605717	0.0012794907156219	significant
CSRP3	52.8778159480669	0	significant
E2F8	1.02683894019056	0.402895095598491	non-significant
CDKN1C	3.80057865138837	0.00189361476410003	significant
STK33	0.772236808926806	0.558667959099336	non-significant
H19	17.9872821918453	6.02106855732189e-57	significant
TRIM21	2.99504055414527	0.0393883626163376	significant
ARFIP2	2.25808998556409	0.0964175923289089	non-significant
TRIM5	0.764468099674284	0.479969695040502	non-significant
RRP8	1.78878504434082	0.101262886864585	non-significant
TIMM10B	-1.12733671809134	0.2935136901475	non-significant
MACROD1	22.93964138341	2.48498527323147e-25	significant
WDR74	3.38308746129755	0.00936637977177637	significant
RTN3	9.4355951714962	3.71474788876255e-17	significant
SWAP70	6.4335480906408	0.0016307293800378	significant
SBF2	1.58177326272297	0.14238947161522	non-significant
MICAL2	2.62518640906904	0.0130401282155819	significant
RRAS2	1.91182636390931	0.0701983106036863	non-significant
DPF2	4.06988098538667	0.000724580738934618	significant
MEN1	-3.06817368204069	0.0181111964694496	significant
LDHA	18.6154858520265	1.74713607068362e-48	significant
LRP4	-3.06900190689331	0.0373960400851485	significant
MYBPC3	7.7130662523264	3.1094705853721e-11	significant
ACP2	1.73170732154328	0.180776447460947	non-significant
TIMM10	10.9568139586205	1.75110255926647e-11	significant
FADS2	5.76832593228415	2.58167003191385e-07	significant
TMEM258	12.5323010195141	6.14161328595834e-24	significant
STT3A	3.22807203549152	0.0056258145260852	significant
ADAMTS8	-3.01861568922303	0.10240848279851	non-significant
ETS1	-1.27979646248996	0.305220866219225	non-significant
PHF21A	1.48641427338857	0.163090493672367	non-significant
NAT10	1.0088869994627	0.375183698392307	non-significant
CAPRIN1	4.63143482207778	2.70001130037577e-05	significant
FCHSD2	0.689152868436339	0.558537289744194	non-significant
ARRB1	-2.7419846901132	0.111182121896319	non-significant
THAP12	2.37037524151711	0.0619837838112	non-significant
NUMA1	0.516936388077317	0.639223771975596	non-significant
CCDC90B	5.0882094586509	1.17361068557669e-05	significant
SYTL2	0.400374008632918	0.699609483996572	non-significant
RAB30	2.70497996865395	0.0405555112907356	significant
PRCP	3.42808815738299	0.00392873362120287	significant
NARS2	5.87845171566403	0.000261860530038579	significant
RNF121	2.31550464074055	0.0672198678161705	non-significant
BUD13	1.77227733764936	0.123623989954592	non-significant
DCUN1D5	8.18025557356047	1.91058603244078e-10	significant
YAP1	1.60727466953602	0.120873919876126	non-significant
RDX	2.67546418636255	0.010663653522432	significant
FDX1	4.29344673881572	0.00020083962416234	significant
C11orf1	17.9362718320297	7.71672052286063e-22	significant
FXYD6	13.2656692049054	9.67198049050811e-27	significant
SIRT3	4.68973085187651	0.00993260621557196	significant
IFITM3	39.6321595421595	8.68005451272881e-82	significant
SCYL1	0.736332744262166	0.490533211674374	non-significant
CDCA5	2.5040214754284	0.0896789189768914	non-significant
BTBD10	4.13281937444949	0.000412533282132548	significant
IMMP1L	2.92478796840115	0.00602763450816006	significant
PGAP2	1.60206403769764	0.180115579518628	non-significant
HSD17B12	2.65643132390497	0.0169117513743629	significant
APIP	3.24536779065581	0.0204557820342721	significant
DGKZ	3.40219099759055	0.0105970629400777	significant
EIF3M	15.4619765456664	8.50723058674472e-40	significant
TNKS1BP1	2.00801038522814	0.29091123860479	non-significant
SSRP1	2.87271336134813	0.00896179458160111	significant
ARFGAP2	4.62856664624711	0.000196488563910564	significant
CELF1	0.30927885332801	0.766866063008375	non-significant
HIKESHI	14.6947630677834	1.72671961732077e-20	significant
SESN3	2.81545404764181	0.10242510477998	non-significant
CCDC82	0.160119651411957	0.87536091161428	non-significant
SERPINH1	7.59295480728824	6.23304624775712e-10	significant
INTS4	3.91583304627616	0.00339165497031959	significant
PAK1	10.3789024655489	0.00785333934530118	significant
RPS3	64.852048262318	0	significant
ZC3H12C	1.54379919940452	0.196678660284108	non-significant
TTC12	3.30225359183862	0.019097026654877	significant
NCAM1	5.99615052506218	3.18434803641586e-08	significant
NPAT	-1.74459239601874	0.166416876590379	non-significant
ATM	-1.69776610272151	0.186257649586048	non-significant
AASDHPPT	4.57443043925755	4.17689624380258e-05	significant
LAMTOR1	7.06036759313322	4.45927005648173e-10	significant
HYOU1	2.9953729905797	0.0107116484726616	significant
TKFC	0.993241235054121	0.365372804457812	non-significant
MTA2	-0.463136820296246	0.683669252706585	non-significant
TMEM138	4.5114440292077	0.0351433340624775	significant
FADS1	4.5063311618883	7.09910794240774e-05	significant
CPSF7	1.55924406301779	0.152781867768888	non-significant
EI24	4.88657126075316	1.45341178308315e-05	significant
CHEK1	2.05612465844501	0.0980666360509016	non-significant
FEZ1	3.191268798205	0.00860593185303445	significant
SCN2B	1.6294041001912	0.129828799655305	non-significant
SIDT2	0.594478181252797	0.645274506227321	non-significant
TMEM25	1.24971602188585	0.26709512198064	non-significant
TAGLN	16.5183888235277	4.31999144415556e-46	significant
TRPT1	10.635549977592	4.66165723891868e-12	significant
NUDT22	13.2343670722837	1.13439542968274e-13	significant
MRPL49	4.92218346903084	3.70355252390781e-05	significant
FAU	78.0538204040822	1.24196286611428e-222	significant
TM7SF2	3.56734160774656	0.005484104059036	significant
VPS51	5.34392639478636	6.66469551054021e-06	significant
CWC15	10.7476282287195	2.37883553992657e-16	significant
TMEM218	1.49823178566333	0.204480960607488	non-significant
PRSS23	2.38008658078654	0.0278937586741439	significant
DIXDC1	1.49291785776919	0.143248266133565	non-significant
DLAT	4.63075768294708	7.35532628017478e-05	significant
NKAPD1	0.784936427060552	0.441201767218775	non-significant
TIMM8B	11.2920060984726	1.01507524789852e-16	significant
PTS	1.75291854169827	0.0879487791999542	non-significant
UEVLD	1.05438248133709	0.47948267462591	non-significant
EXT2	2.02128024068581	0.0871355031646148	non-significant
NDUFC2	43.8414008408158	4.9177158357418e-128	significant
ACAD8	1.54646071830308	0.156577725789507	non-significant
THYN1	9.00173097915976	7.58806351859208e-11	significant
VPS26B	1.2811289345503	0.223869466426924	non-significant
NCAPD3	0.845474383519964	0.427829821121765	non-significant
ARL14EP	1.93691474471298	0.0719599971348209	non-significant
PDE3B	0.062130199103023	0.953384750785453	non-significant
GUCY1A2	2.17061247179974	0.0863971816381381	non-significant
TMEM123	4.39966637774103	4.59684889329492e-05	significant
TBCEL	-0.0878439456637466	0.935495558937202	non-significant
TBRG1	1.53704323840452	0.177415547610715	non-significant
UBE2L6	11.1629594329618	9.070142567928e-11	significant
ZDHHC5	1.29195204327525	0.228188040350978	non-significant
MED19	9.6446374505265	1.31627436355083e-07	significant
TSPAN18	4.72549393068614	5.62149349602036e-05	significant
MRPL17	6.24024706265273	4.44937015691917e-08	significant
EMSY	0.377255928867877	0.718639387276344	non-significant
ALG8	3.40240124879109	0.0128425067958782	significant
SIK3	2.47522349003737	0.0515875878959358	non-significant
PCSK7	0.816649805363776	0.442486440989825	non-significant
VPS11	5.42511948946253	0.00025345680160085	significant
NLRX1	2.32534952179013	0.0543305812586519	non-significant
NEU3	1.96807582224506	0.100228846931098	non-significant
CYB561A3	-0.0878323438684645	0.934919727253432	non-significant
ASRGL1	0.97059342282499	0.436000568496481	non-significant
UBXN1	6.62145583627485	9.36469305812157e-07	significant
LBHD1	4.47799730105538	0.00032258227906269	significant
TTC9C	1.14742599857974	0.41197060232814	non-significant
TAF6L	0.03246580539647	0.979248465396509	non-significant
NXF1	0.603003784764002	0.650601169999468	non-significant
STX5	4.27247862035698	0.00157031115275733	significant
SYVN1	19.2593777438133	5.03084663829934e-52	significant
ZFPL1	8.5849592068349	5.4192552170154e-05	significant
RPS6KA4	0.200968277840988	0.855897253658443	non-significant
FAT3	-2.61794860581844	0.0605476366634294	non-significant
INPPL1	1.41358295577742	0.207445941184828	non-significant
RPUSD4	12.9955155760559	2.91705690888927e-10	significant
PACSIN3	0.573377671207685	0.667806185053888	non-significant
SLC39A13	1.63046277722124	0.135982466814031	non-significant
PSMC3	5.30254615255316	1.44104550592544e-05	significant
CEP295	0.0875126964749687	0.938319121117022	non-significant
TAF1D	2.84624908925807	0.00808081443685564	significant
ABTB2	1.2208915281119	0.337585613813288	non-significant
AMOTL1	-2.65971923847857	0.0208024021465662	significant
CEP57	2.09945755600707	0.0690900429944097	non-significant
JAM3	2.11788034308856	0.0865273047685601	non-significant
API5	3.033969003471	0.0049965123302671	significant
CUL5	1.30017810040562	0.244026562366341	non-significant
SMPD1	2.68799962774892	0.0183271795016587	significant
APBB1	4.06846664016212	0.000467967097176524	significant
TRIM44	2.62407575474899	0.015817711354859	significant
ILK	12.8449151727149	3.75910862642462e-20	significant
TAF10	7.05254298445309	4.91810298963013e-11	significant
TPP1	0.577595389905563	0.578805709849956	non-significant
DCHS1	1.94419793602164	0.145061030383252	non-significant
XRRA1	7.73013194594544	0.00292604085338583	significant
RNF169	0.128594844480288	0.900016592626807	non-significant
RPL27A	52.9334635117825	3.5172516074666e-314	significant
AKIP1	1.7888067051812	0.135940233965346	non-significant
TMEM41B	-0.502959478072292	0.631775893657624	non-significant
ZNF143	0.5129109173485	0.617187812227066	non-significant
WEE1	6.38269459406652	1.37214147420936e-08	significant
PLEKHA7	7.72571997698078	2.2852047527903e-14	significant
SAAL1	0.587781843580243	0.657818121931604	non-significant
FAM111A	0.796024996407809	0.539934877914631	non-significant
NAV2	-1.4770403526881	0.155431753797478	non-significant
PATL1	3.28153272611948	0.00664878069076098	significant
MRPL16	5.33469401948535	7.84017817006782e-05	significant
IGF2	2.57099869940656	0.0146362476384189	significant
RNF214	3.4344868721789	0.00560296902597871	significant
ATP5MG	26.0766890441714	6.83746161032598e-98	significant
STIM1	2.0220739508682	0.0578843686400798	non-significant
RRM1	3.27415615857147	0.00329352013836091	significant
OTUB1	3.91498896143309	0.00137163017184196	significant
NDUFV1	12.5684013518597	2.49757324897957e-22	significant
CDK2AP2	7.90123966539384	1.11026489312054e-06	significant
NUDT8	6.01309237517359	0.00370487458452571	significant
SDHAF2	4.08782080431277	0.000654124700087183	significant
DDB1	6.57962201072027	1.13579097861062e-08	significant
VPS37C	3.02409212771673	0.0574151320563007	non-significant
RAB3IL1	0.0498871494284252	0.963322004900686	non-significant
FTH1	87.0592079637402	0	significant
BSCL2	2.68924764620895	0.0275287022503271	significant
POLR2G	7.70795277514595	7.05092591812329e-10	significant
SLC3A2	3.47347561769968	0.0045844581216757	significant
SPINDOC	1.60546769502436	0.239320579505433	non-significant
FADD	4.88951676648659	0.000382901888128025	significant
LTBP3	3.33295659675619	0.0349333488693314	significant
SAC3D1	2.37109242052352	0.23639937704166	non-significant
SF1	2.77427888044499	0.00895272792886821	significant
PAFAH1B2	0.740314730386312	0.474620362062237	non-significant
STIP1	2.86158386933825	0.00718447506933527	significant
FEN1	3.45552967263349	0.00319710592368631	significant
TMEM223	3.81076089505958	0.00163576985340743	significant
ANKRD49	1.09359843154586	0.446431272819696	non-significant
METTL15	0.472586551770545	0.645722851087265	non-significant
SIK2	2.38732438190155	0.0410215724521486	significant
USP47	1.46723350459166	0.167957945744085	non-significant
HSPB2	14.4153829791347	2.57947140393838e-22	significant
NFRKB	2.44066614379695	0.0854958770653132	non-significant
SYT9	1.37040421987619	0.203788853149616	non-significant
MSANTD4	1.99557726882608	0.128468186926965	non-significant
DNAJC24	3.09486893127919	0.00973513651010609	significant
CAVIN3	11.3670608657174	2.40911939837395e-14	significant
PDGFD	3.32293237253375	0.00354964925184438	significant
C11orf24	2.50085604997183	0.033485153687589	significant
TMEM126A	11.1752916348342	1.16773585928904e-12	significant
TMEM126B	10.4714379041199	1.61987893921725e-17	significant
MAP6	2.29158819902166	0.0748041121548591	non-significant
P2RY6	0.40669519073983	0.725336296392146	non-significant
ANO5	1.26166170932909	0.226434452150286	non-significant
DPAGT1	4.75168203905791	0.0175893320339031	significant
HINFP	5.60528846779895	0.000247303512173509	significant
CLP1	3.32550650790775	0.0109019551033664	significant
FIBP	11.0768691747501	3.71396043754699e-15	significant
PPP1CA	11.883488290609	1.37333509692308e-15	significant
EFEMP2	4.95751636931033	1.38511831529288e-05	significant
TMEM134	8.90608699751417	2.33405343621714e-11	significant
CORO1B	2.76004152587335	0.0263485389867485	significant
MUS81	1.42421332736643	0.275292773201564	non-significant
CFL1	46.9028457113993	1.26428155074659e-230	significant
SSH3	1.95095784846356	0.0990909528898083	non-significant
NADSYN1	-0.199781678830223	0.85419632490588	non-significant
DHCR7	0.893915090394512	0.407666573383664	non-significant
RNASEH2C	14.8656940258775	1.79268954519755e-15	significant
GRK2	3.06170428711194	0.0135352664047245	significant
RELA	3.60627741919453	0.00199761510591556	significant
TRMT112	34.4357243403506	1.11599469362949e-78	significant
KDM2A	3.29749872018565	0.033903012613391	significant
ESRRA	1.2127379481711	0.275893239465707	non-significant
RHOD	13.835515043782	1.9873341786723e-16	significant
GPR137	7.81240612033519	0.000741132214017249	significant
RNF26	1.28405034466291	0.25540277457411	non-significant
PPP1R14B	18.4681698283399	1.09536098535308e-31	significant
VEGFB	16.5903339317287	2.4477623131401e-31	significant
LRFN4	4.66384695873956	0.018606032546455	significant
RBM4B	2.0042379089498	0.26771991053726	non-significant
RBM4	9.79270341864402	5.00533788876785e-15	significant
CCS	33.0466112511586	1.55572711550725e-10	significant
ZNHIT2	12.1788330333594	3.28358421518212e-09	significant
BBS1	0.978913221091262	0.409780064019057	non-significant
MRPL11	15.8845812099817	4.97152857771461e-20	significant
B4GAT1	15.0796463019598	2.94783369842913e-15	significant
BRMS1	0.442403206787343	0.733457066954535	non-significant
HRAS	16.1672837843664	4.16302525035099e-16	significant
YIF1A	6.82243160672664	1.37792932663831e-08	significant
RAB1B	7.15130163139883	3.047540118929e-09	significant
PTDSS2	4.52874584457787	0.00136774434683268	significant
KLC2	2.54233576179551	0.0372455486466791	significant
TRAF6	2.01531364127293	0.0743232562319749	non-significant
PACS1	1.43168884784139	0.186786738822318	non-significant
CKAP5	2.21297411537224	0.0405719518965992	significant
ARHGAP1	1.56941516320971	0.156404422984549	non-significant
ATG13	0.835878915067252	0.415793131163642	non-significant
TP53I11	3.55366780582693	0.0141677427526623	significant
BANF1	33.0694564915795	7.11762900940694e-81	significant
TMEM9B	5.27523770402827	5.30474011727292e-06	significant
EIF1AD	1.72306426514755	0.117436870745514	non-significant
EIF3F	9.95302113064522	5.66944112083109e-18	significant
SART1	1.32802609276391	0.236969002241205	non-significant
POLD4	3.04317439779482	0.0103729248014309	significant
DRAP1	7.4050034486465	8.71204206016798e-09	significant
C11orf68	4.54150111706875	0.00129437878300836	significant
PAAF1	9.15163896136413	1.29497097397583e-06	significant
MRPL48	9.58138482348779	2.72851042851424e-10	significant
RAB6A	3.15968507565323	0.00389795998866726	significant
CCDC85B	18.257613799947	1.1107144921329e-13	significant
RPS6KB2	2.99466907858968	0.0486932967282795	significant
CSTF3	4.24086180995663	0.000550526695428888	significant
COX8A	100.167503569672	0	significant
FAM89B	10.5389775996112	1.9343947299143e-17	significant
DEAF1	5.14557888170821	5.30734557373001e-05	significant
TMEM80	5.64891886532049	1.03336736156272e-05	significant
ZDHHC13	-1.01651424784983	0.470085035326486	non-significant
RHOG	5.61791724327771	3.11276687037915e-05	significant
TALDO1	16.5013029153293	2.6707763372946e-27	significant
RPLP2	111.810464500884	0	significant
PNPLA2	3.05707380065319	0.0140274296173756	significant
CD151	17.732249941559	7.09439079027624e-46	significant
POLR2L	33.2013528054026	8.28920110848084e-133	significant
CHID1	5.22080497539368	2.55422328691714e-05	significant
BET1L	1.55218472601834	0.176432905758623	non-significant
RIC8A	5.8910349942289	1.52809795727874e-06	significant
DDX10	2.87746945981877	0.0208779562446385	significant
SPTY2D1	0.637451800910723	0.583254765300701	non-significant
FJX1	1.8147690742595	0.129561967364476	non-significant
SLC36A4	1.30486167085834	0.228226841286802	non-significant
COA4	16.4327341612581	7.26069813958738e-26	significant
MOB2	2.84674683661252	0.0170516410219999	significant
KCNA4	0.916707330387674	0.374821264153007	non-significant
KBTBD3	0.212638888917475	0.838599449523642	non-significant
C11orf54	2.75691934754507	0.0112235562295786	significant
SRPRA	3.18348740532347	0.00316285618955386	significant
CADM1	3.22501927647417	0.00349596685199251	significant
AP2A2	3.30040832951874	0.00790677988156896	significant
FANCF	2.46064382875361	0.0342470567527148	significant
JRKL	1.3520504454611	0.322586546431785	non-significant
DENND5A	3.70087467884915	0.000564256221651759	significant
TSSC4	5.40139376151766	0.00851531414062933	significant
DUSP8	6.56084431103292	0.00159477946548954	significant
OR7E14P	3.54437920691541	0.0380297423225441	significant
WT1	4.28696391425889	0.000101201340946727	significant
INTS5	0.519945450650303	0.634847326753364	non-significant
SIGIRR	6.51966211903425	0.00240602846301533	significant
IFITM2	21.962732419453	9.10233073794826e-28	significant
PRMT3	2.27196249196126	0.123715072183532	non-significant
TMEM179B	10.5324122583791	7.23971352032674e-12	significant
PSMD13	3.21775069416527	0.00826150316845535	significant
BCL9L	-0.172065622029189	0.874543024632866	non-significant
KDM4D	0.682916222197136	0.609272532506314	non-significant
BACE1	2.12119480642538	0.10196997513177	non-significant
ARAP1	2.73729336506838	0.0137441262358089	significant
ZFP91	2.64746410490523	0.0159596057874318	significant
TMEM216	3.15263783813447	0.183825302007046	non-significant
TEAD1	-1.52794118251867	0.135591114711883	non-significant
KCNJ11	4.00697286176298	0.00961851558346203	significant
KCTD21	1.30736589314054	0.31220131469853	non-significant
FAM111B	1.53660959983984	0.178360917279614	non-significant
ZBTB44	0.567971568838036	0.589190643014622	non-significant
TRAPPC4	8.90431389316166	8.87702922644323e-10	significant
ARHGEF12	2.30221362802619	0.0326968658901379	significant
MRPL21	11.3157963806218	1.01412244904355e-14	significant
BCO2	1.0106125884003	0.359196391775554	non-significant
FAR1	-0.099400913189268	0.921987924648076	non-significant
PARVA	1.88825684039124	0.0642648643909356	non-significant
FAM118B	3.02764570295571	0.0808948049988524	non-significant
SVIP	1.02420417007597	0.316069116145344	non-significant
HYLS1	3.07896986078548	0.0205271569112812	significant
UVRAG	1.69270381791151	0.137566925513747	non-significant
CTNND1	2.07366733000047	0.0449391023710627	significant
CTR9	0.577766948933264	0.573723123018657	non-significant
SDHD	12.1842478904482	2.09053861451293e-21	significant
UQCC3	3.21807895190246	0.00621208560880444	significant
LGR4	4.82616156681808	4.94966250440118e-06	significant
IPO7	2.99285974714869	0.00602701630161866	significant
NAP1L4	4.14985153992692	0.000565120713947892	significant
SELENOH	15.38107577822	2.1256302168554e-22	significant
ARL2	17.0597066900125	6.22988459596849e-24	significant
TMX2	3.23328714416201	0.00451573245134153	significant
NDUFS3	6.72599879350159	6.68987616363417e-09	significant
MRPL23	2.28105466958905	0.0995523922309837	non-significant
TSPAN4	2.86392502327793	0.0185514618347721	significant
PPME1	2.28551106094415	0.0375951259558292	significant
STARD10	3.60667597084691	0.00327922639115094	significant
HNRNPUL2	2.78054592768719	0.0989809071134427	non-significant
FADS3	3.84905891400462	0.012831712927356	significant
RPS28P7	130.123688124466	5.24123567405881e-296	significant
SRP14P2	23.3472810851627	1.95425864688757e-05	significant
FABP5P7	95.3512958184555	4.55990471269426e-08	significant
ZBED5	3.50986935395186	0.000928782771664221	significant
RBM14	1.19213767766073	0.271445491891703	non-significant
RPL37P2	2.03093618211597	0.173695959232177	non-significant
ZBED5-AS1	4.52832723800138	0.000496504259937511	significant
RBM14-RBM4	8.82006143095118	4.70377798782175e-14	significant
HSPB2-C11orf52	14.4290999503746	1.24874526688031e-22	significant
NAV2-AS2	4.15727090812861	0.000821509164149038	significant
EEF1G	58.7913776352494	0	significant
SCARNA9	-0.0337769073464619	0.976193726522334	non-significant
DPP3	8.94091843284022	1.90857601970846e-05	significant
FXYD6-FXYD2	13.2656692049054	9.67198049050811e-27	significant
MIR100HG	2.89481851044138	0.00934802660714965	significant
SNHG1	7.65151042615003	0.00196591375972886	significant
HMBS	1.92630733211061	0.0962963881691662	non-significant
SPON1	5.10463657710971	3.28165720085125e-06	significant
SRSF8	4.70114808392209	0.000256897725215985	significant
C11orf98	4.47799730105538	0.00032258227906269	significant

## Sheet: unblock
gene	statistic	pval	marker
BAD	-20.3739804670774	4.0713086013228e-37	significant
ZNF195	-2.45961505036359	0.0624809305298801	non-significant
TMEM132A	-5.25591637106029	0.000503229022020556	significant
POLA2	-7.07154150794262	3.3545619436819e-06	significant
CAPN1	-12.3176181372857	1.56065081497833e-19	significant
PHLDB1	-8.18624028036234	2.13586838755874e-10	significant
PRDM11	-4.07929854929211	0.000986545741139742	significant
SYT13	-5.59274670076367	6.39763315847466e-05	significant
RNH1	-21.6488739647476	7.56981530101132e-37	significant
USP2	-3.59428027787465	0.00156093779643108	significant
MED17	-8.0262588916811	5.97506474205601e-08	significant
USP28	-8.61646449336466	5.74027845540402e-12	significant
RCN1	-11.2851900848026	1.38972355987329e-13	significant
DKK3	-27.7148190596504	9.99124113067517e-75	significant
TTC17	-6.99954838348489	2.83762051202775e-06	significant
KCNQ1	-6.67429364358419	1.93665044749459e-06	significant
QSER1	-3.67098698625759	0.00419092427145562	significant
SPA17	-2.27578222509265	0.0677482004176411	non-significant
CDON	-3.38302528901874	0.0195281668802234	significant
RASGRP2	-2.69296871959493	0.0439504370722075	significant
PYGM	-13.6618087036239	1.35391481884224e-14	significant
NUCB2	-8.74879127179961	5.18341563700852e-11	significant
MARK2	-3.17457551535449	0.00612022309516269	significant
PICALM	-11.4078423736959	2.04670073308404e-16	significant
CLNS1A	-12.1296250983979	8.87070435038297e-16	significant
TSG101	-17.3866950356475	6.68072225752897e-19	significant
ACAT1	-19.3875146726484	8.28145450894377e-37	significant
REXO2	-9.25897830780788	0.00134020302346736	significant
RBM7	-6.08849460026078	2.27742381853302e-06	significant
POLD3	-3.91599396221348	0.00349845967121492	significant
TOLLIP	-7.05121773165503	2.15875713241972e-07	significant
GSTP1	-20.5765361755373	4.01919578208762e-60	significant
APLP2	-22.0283172564002	2.43356484637439e-66	significant
CD59	-17.9304546703658	1.75558345969464e-48	significant
ZW10	-2.0886872738279	0.127570846923823	non-significant
ALG9	-5.29537100983852	0.000208978079375499	significant
MTMR2	-5.15416808551676	0.000128834826183385	significant
SF3B2	-11.747423974425	2.28480517530049e-16	significant
AAMDC	-3.04006780261124	0.00286173125677963	significant
GANAB	-7.6413438574156	1.40061058748249e-10	significant
ARCN1	-7.97514746161869	2.00313154900438e-09	significant
CRYAB	-51.8754224904623	0	significant
CTSC	-4.95063366018911	0.000568764170784118	significant
CCDC34	-8.20427398587169	1.99875564825896e-07	significant
ZPR1	-7.78238984978476	9.23999194349748e-08	significant
MTCH2	-12.7505923999289	9.66897653504331e-24	significant
SC5D	-9.44785241550215	1.07007125106293e-12	significant
HSPA8	-46.1478284362646	1.72480519236117e-215	significant
DNAJC4	-9.84269069409835	6.19787064942818e-14	significant
SIAE	-60.3231282574292	0.00816839283392846	significant
SNX15	-5.78913546166876	3.95808011663468e-05	significant
EHD1	-8.08133168239288	3.20472739190708e-09	significant
OSBP	-5.41326599340392	6.33960059798198e-05	significant
DCPS	-3.70598392958314	0.0124558499633748	significant
FOXRED1	-5.47027273985867	0.000296209607234879	significant
PPP6R3	-3.9893879547517	0.00151607593942531	significant
ST3GAL4	-12.8065502655956	3.49256057426197e-15	significant
CCND1	-7.82524721433123	1.50166616678138e-09	significant
CCDC86	-3.64055337361774	0.0132533635688895	significant
PRPF19	-6.11601808725569	1.17974020545465e-06	significant
TMEM109	-13.6501426595238	6.14076881657494e-17	significant
CHORDC1	-4.69113975758224	0.000245622898684318	significant
ANAPC15	-5.57711074771564	3.02670006389176e-05	significant
ARHGEF17	-6.70896579100508	1.32279853817818e-07	significant
EIF4G2	-29.0970063900807	9.02210278596548e-105	significant
GALNT18	-4.75213422695682	0.000779219086304982	significant
BIRC2	-8.01435024588879	8.06247490975545e-09	significant
UBE4A	-4.52313785771269	0.00184684415817928	significant
DDX6	-6.63207200346951	1.73930168349344e-08	significant
NECTIN1	-5.94619598740816	2.887587911055e-06	significant
HIPK3	-6.72170295231522	1.06817244563954e-08	significant
FBXO3	-11.0684254763312	1.03435992567719e-15	significant
PDHX	-7.74725279214185	5.85444114859844e-10	significant
COMMD9	-12.4923709248195	2.28960372740849e-16	significant
MDK	-57.0652790299061	0	significant
AMBRA1	-3.70424413957255	0.000270141788232956	significant
PTPMT1	-5.09699917362579	1.27428520860384e-05	significant
SLC22A18	-7.10830389296736	3.54237764466249e-05	significant
CD81	-44.3795900864526	4.49419929412249e-167	significant
C11orf58	-14.9761179810221	8.37840512747109e-30	significant
PITPNM1	-4.63058154383024	0.00979918875131527	significant
RPS13	-6.73117271176034	2.60699695116654e-11	significant
AIP	-21.8723497087525	3.34537053426972e-24	significant
NDUFS8	-15.4696173258713	2.6588079875558e-27	significant
GTF2H1	-7.25067075524399	2.22163393669223e-07	significant
CTSD	-17.4320382403247	2.14315601027862e-30	significant
IFT46	-5.91720838883227	0.000248384859453027	significant
APOA1	-8.23029130709853	3.67244564844708e-09	significant
RPS25	9.8211962933705	5.08065044413306e-20	significant
SPCS2	-12.8293948549079	1.47023662900507e-15	significant
SNX19	-4.05214577662903	0.00189722473429987	significant
KCNJ5	-6.16002689915684	8.69657173901295e-07	significant
MAPK8IP1	-2.34726342471275	0.0770547495308656	non-significant
CRY2	-7.21026704876309	1.53109785661863e-07	significant
CAT	-12.8685763542381	1.84348572896604e-10	significant
KBTBD4	-5.03263212320791	0.000997136707384297	significant
AHNAK	-9.27579167712459	2.11366323790767e-17	significant
PRDX5	-25.0864357871868	9.27745042219045e-63	significant
COPB1	-10.1040719912133	2.19241872942666e-14	significant
PSMA1	-12.2251621056613	5.2788714514104e-22	significant
SERGEF	-6.42732361609747	0.0059082257399003	significant
CSRP3	-49.4212388450191	1.13879562225049e-317	significant
CDKN1C	-7.31539562062582	3.60841210926299e-08	significant
STK33	-6.45288846596159	0.00131386219494175	significant
H19	-25.8756810520136	5.27185005179627e-96	significant
PPFIA1	-3.48122174467822	0.00442888762385762	significant
ARFIP2	-8.55669814892211	1.84240075162915e-09	significant
RRP8	-3.19669497786398	0.0124324555071014	significant
TIMM10B	-3.55920874573024	0.00906118405146704	significant
MACROD1	-10.7915568749644	7.26998319801249e-15	significant
WDR74	-7.97417475186791	2.77977530077858e-07	significant
RTN3	-20.1049382486294	3.59926573843934e-47	significant
MICAL2	-7.87756168326742	1.15591247644341e-08	significant
RRAS2	-8.36196716393801	3.06048148694618e-07	significant
DPF2	-11.371529557259	2.00717594231815e-13	significant
MEN1	-3.96822011796682	0.00445075625818046	significant
LDHA	-31.9892274609511	8.70516491182163e-87	significant
MYBPC3	-28.9534886356351	7.83631374750885e-109	significant
TIMM10	-2.28083665310702	0.029222829807722	significant
FADS2	-10.4534308645184	2.17991737569993e-17	significant
TMEM258	6.45073482244945	1.28726009133238e-09	significant
STT3A	-5.69092845493894	1.4040591377444e-05	significant
ADAMTS8	-7.12910737730446	4.57932856671467e-06	significant
PHF21A	-6.14115313221319	1.59883247100281e-06	significant
CAPRIN1	-11.583049333679	3.10542043681124e-19	significant
FCHSD2	-7.54511591392726	1.46992728796395e-07	significant
ARRB1	-3.04861094639429	0.0928342601933659	non-significant
THAP12	-3.6969523280992	0.00767307917581036	significant
NUMA1	-9.35845070834052	7.31963451503223e-13	significant
CCDC90B	-8.33512852691058	1.07976605484578e-09	significant
PRCP	-9.91070557829962	1.20652655709557e-10	significant
RNF121	-6.72781596477689	2.02452111063449e-06	significant
DCUN1D5	-8.49942767966211	1.10841695391951e-07	significant
YAP1	-7.7230140984661	2.48528271498695e-10	significant
SLC37A4	-6.07798545060263	4.76890079740405e-05	significant
RDX	-8.14826099131708	5.4451114037201e-11	significant
FDX1	-12.4826511880461	6.48291633411639e-17	significant
C11orf1	-4.07454744887558	0.00396315124556865	significant
FXYD6	-30.3381604671304	4.61570682301228e-75	significant
SIRT3	-5.60992160112328	0.000102392777860137	significant
IFITM3	-8.24939213825614	6.26991189264693e-09	significant
SCYL1	-7.72106191919937	1.3533080931862e-07	significant
CDCA5	-2.59651003648899	0.0403846721544468	significant
BTBD10	-7.56044865419017	6.60836690193692e-07	significant
ADM	-3.13034584297775	0.0864655877351317	non-significant
IMMP1L	0.280131171671742	0.781671022551738	non-significant
TUT1	-11.2173263783154	0.056385775535397	non-significant
HSD17B12	-6.53288747404025	8.29639084861582e-07	significant
DGKZ	-5.3500778028029	1.47420684253379e-05	significant
EIF3M	-23.5942756167894	3.01803504226287e-73	significant
SSRP1	-8.47471872439045	7.32685909691917e-11	significant
ARFGAP2	-12.1601503613818	4.76226310583385e-16	significant
HIKESHI	-15.9974915265583	3.39760832899433e-30	significant
SERPINH1	-20.0852425655279	2.54400986865685e-45	significant
RPS3	-61.3317331917747	0	significant
ZC3H12C	-2.94135936038796	0.0588795089757057	non-significant
NCAM1	-13.8162937622494	1.07943594300403e-28	significant
AASDHPPT	-7.87776698756516	4.04132803104302e-10	significant
LAMTOR1	-8.64234673253498	1.81829255654675e-13	significant
HYOU1	-8.03978992528568	1.90645250812152e-08	significant
MTA2	-1.99207947967285	0.0864429289006523	non-significant
FADS1	-7.02727822293975	1.30843781399684e-08	significant
CPSF7	-5.38381985634125	2.39326977409757e-05	significant
B3GAT3	-6.90371274127614	3.67909515345197e-05	significant
EI24	-11.2447197724199	4.86921721931309e-14	significant
CHEK1	-3.9660106248354	0.00348880232697363	significant
SCN2B	-3.26362799506627	0.0113036729150715	significant
TMEM25	-2.65070067609384	0.117280042163023	non-significant
TAGLN	-16.9621352221021	3.58385181715769e-47	significant
TRPT1	-8.32083885547595	1.28004566958374e-08	significant
NUDT22	-14.128250397491	3.32459889460499e-20	significant
PLCB3	-2.98246901579151	0.0944306939447949	non-significant
MRPL49	-9.54227242315667	6.74030809062502e-08	significant
FAU	-1.96820570176825	0.0515220259368944	non-significant
VPS51	-13.2857563746539	2.91212999010806e-18	significant
CWC15	-8.43620405796748	2.55351834097181e-11	significant
PRSS23	-3.20285648945968	0.0106294594369749	significant
DIXDC1	-6.05672623061307	7.06274232657286e-07	significant
DLAT	-10.2198569121998	7.88935336915473e-16	significant
TIMM8B	-0.15076054795532	0.880729304127639	non-significant
PTS	-2.66232924143261	0.0126235450224992	significant
EXT2	-5.04294960720179	6.73023010297367e-05	significant
NDUFC2	-10.9510761905869	4.16072760659874e-16	significant
ACAD8	-4.72219893623239	0.000163315825421794	significant
THYN1	-14.5416149595784	5.71103191272917e-17	significant
VPS26B	-6.55481938105832	1.8032334807446e-07	significant
GUCY1A2	-2.77247683427474	0.0196211152989959	significant
TMEM123	-8.19519402951426	1.32984821111365e-10	significant
UBE2L6	-14.997098104459	8.37833445735649e-18	significant
ZDHHC5	-5.4365003674064	1.71163219746323e-05	significant
TSPAN18	-7.89952396579705	3.54327068066088e-09	significant
MRPL17	-8.22249755716181	4.98399021012031e-12	significant
SIK3	-4.22432266650173	0.000347226757999937	significant
NEU3	-2.11951622050221	0.0873069996365871	non-significant
UBXN1	-13.174811166368	2.14506690883648e-21	significant
LBHD1	-2.1302491763978	0.0429670133930666	significant
TTC9C	-4.78852529028171	0.00124949138936642	significant
STX5	-8.66777136631892	5.38806762935831e-08	significant
SYVN1	-0.218315147845786	0.847303832431801	non-significant
RPS6KA4	-3.84621747299514	0.00294980886764383	significant
LRP5	-4.51052095446778	0.000704002293825578	significant
INPPL1	-7.41189548257145	3.59123449386323e-08	significant
RPUSD4	-7.27850691162698	6.67916340066184e-07	significant
PACSIN3	-7.77107853912701	5.77167262561814e-09	significant
SLC39A13	-8.31113662292571	1.78288442829285e-09	significant
PSMC3	-19.0860463763272	1.02797848073063e-38	significant
CEP295	-1.3725059851896	0.303092254291778	non-significant
TAF1D	-3.39760735877281	0.00273357508420713	significant
ABTB2	-4.6593717567139	0.00552424280771848	significant
CEP57	-6.30406319279997	3.19148892146985e-06	significant
JAM3	-3.99617536218726	0.00205312872487312	significant
ADAMTS15	-2.55673515228311	0.0430776734793009	significant
API5	-7.40535342197897	2.75592795717245e-08	significant
SMPD1	-5.96574852954493	3.20892125469439e-05	significant
APBB1	-13.1201552440042	3.62699616785935e-20	significant
TRIM44	-5.60033922229623	8.43275516466748e-06	significant
ILK	-24.6705980854883	1.05241216017886e-57	significant
TAF10	-5.7930817073042	5.66214165527158e-08	significant
TPP1	-9.41751089490471	7.95633029007228e-06	significant
DCHS1	-3.27315531464987	0.00557202007293255	significant
RNF169	-2.58262730045297	0.0271345489214851	significant
RPL27A	-3.73921270429004	0.000190110413688946	significant
AKIP1	-5.2582684260915	6.80582233218095e-05	significant
TMEM41B	-4.45279066854461	0.000370002437579518	significant
ZNF143	-4.10044000384875	0.00213589546818579	significant
WEE1	-12.9321352300945	1.38584625754005e-24	significant
PLEKHA7	-0.985610031991127	0.324547307117863	non-significant
NAV2	-4.18647064114588	0.000365868451973093	significant
MRPL16	-11.696039298794	1.58313670791577e-16	significant
IGF2	-6.88605288298658	3.95289018618574e-09	significant
RNF214	-4.1436407157604	0.00308563886013306	significant
ATP5MG	1.22718304110727	0.220707297867606	non-significant
STIM1	-6.17141901529141	5.14051214392359e-06	significant
RRM1	-7.0000657280018	2.50196747507316e-08	significant
OTUB1	-10.9745630211316	3.63313422270777e-17	significant
RCOR2	-2.85722893570527	0.023643183614294	significant
NDUFV1	-28.9504795720877	3.69592121867076e-65	significant
NUDT8	-13.4514674097179	1.26255802629377e-08	significant
SDHAF2	-9.7808523060257	2.86618601262604e-10	significant
DDB1	-13.9843756373789	1.40783151932389e-25	significant
VPS37C	-3.75361135709986	0.00531574965176568	significant
FTH1	-66.7592825308688	6.77837855400339e-215	significant
BSCL2	-3.19140669316977	0.0114812021956348	significant
POLR2G	-8.95653535595326	2.48905373697502e-14	significant
SLC3A2	-11.826643490191	8.60755482539163e-11	significant
SPINDOC	-4.9734417083069	0.000408088213872258	significant
FADD	-8.92686157201249	5.32305387785535e-09	significant
LTBP3	-5.26749874389852	1.33720177327346e-05	significant
SF1	-14.2752140063624	6.31471061918701e-23	significant
PAFAH1B2	-4.45251332955856	0.00023106493381362	significant
STIP1	-14.0572608653472	2.77937008311627e-25	significant
FEN1	-9.16103987471452	1.83285518040156e-09	significant
TMEM223	-3.84940187106252	0.000483910236007428	significant
SIK2	-4.62763140114718	0.000240138382792692	significant
USP47	-6.55394207693728	7.63328120445846e-08	significant
HSPB2	-19.0854128913224	1.077761078369e-47	significant
SYT9	-4.04091402384623	0.00846737259575447	significant
CAVIN3	-17.5910094529834	2.22065330383416e-18	significant
PDGFD	-9.7469594144196	2.8611536893326e-11	significant
C11orf24	-4.49158038176864	0.00102830720161608	significant
TMEM126A	-8.11993178365465	4.11823321993129e-07	significant
TMEM126B	-13.5993082822222	3.87019225021774e-23	significant
MAP6	-2.86128145156415	0.0623786586083093	non-significant
ANO5	-2.05026411968197	0.0743242791640039	non-significant
HINFP	-6.8162624871769	4.50086405112104e-05	significant
FIBP	-17.0402740512126	3.20429590780249e-26	significant
PPP1CA	-22.7500086375295	3.10440684296176e-48	significant
EFEMP2	-24.2052626502602	2.55598541981629e-55	significant
TMEM134	-11.5750457920505	4.78710190653639e-17	significant
CORO1B	-3.88752066204698	0.00348718002412279	significant
MUS81	-5.32714994923945	0.000116749743120506	significant
CFL1	-52.7972803779689	2.91512879990293e-258	significant
SSH3	-2.13624836843596	0.0852761084197745	non-significant
DHCR7	-9.54778778148006	7.81186424423285e-07	significant
RNASEH2C	-3.45429003512979	0.00193178140629983	significant
KAT5	-9.83034137528797	1.48004956992454e-08	significant
GRK2	-5.96429942009313	9.01888844535723e-06	significant
RELA	-7.45390117829795	4.1632836050065e-08	significant
TRMT112	-2.21056233309967	0.0659217175048456	non-significant
KDM2A	-4.20610654690273	0.000898283073681887	significant
ESRRA	-8.83649085027622	4.06367413187196e-11	significant
RHOD	-12.8141101852691	2.14581348883351e-11	significant
GPR137	-7.15105472014934	1.89373929445455e-06	significant
MAP3K11	-4.31235498072818	0.0122099856987749	significant
RNF26	-6.99680021963326	4.14479911648541e-06	significant
PPP1R14B	-15.616419197477	3.00674549717648e-25	significant
FKBP2	-3.59375588246588	0.000581779174042701	significant
VEGFB	-24.3047465529053	2.86614407279025e-54	significant
LRFN4	-3.41120423098528	0.0420874514703386	significant
RBM4B	-3.52759795612935	0.00370013518911191	significant
RBM4	-12.6377218388137	3.59914454676736e-19	significant
CCS	-11.5676809117915	0.000113874405483236	significant
CTSF	-7.18603302508139	9.03284933931093e-07	significant
ZNHIT2	-5.43164859880529	8.75927163217872e-05	significant
PELI3	-4.31480342255826	0.131537153387353	non-significant
MRPL11	-11.9881695209748	4.9720324206018e-15	significant
B4GAT1	-9.30544511370404	3.87675316872173e-10	significant
BRMS1	-3.79629574201608	0.0015850854727538	significant
HRAS	-10.6180822049575	4.5041866637833e-13	significant
YIF1A	-7.65968018005776	6.89392919648187e-09	significant
RAB1B	-17.0450239162985	8.47859542377285e-31	significant
PTDSS2	-7.65803395332458	1.29947515636704e-07	significant
KLC2	-3.41486632511842	0.00500975469938066	significant
TRAF6	-3.57337979175254	0.0159845827853647	significant
PACS1	-8.62068363785415	1.27412059378124e-11	significant
CKAP5	-4.88643947005239	4.83009733089071e-05	significant
ARHGAP1	-8.72797001970897	9.52615238726805e-11	significant
ATG13	-9.2314069323697	1.52734517214169e-07	significant
GAL3ST3	-4.27464570038814	0.00255663448811271	significant
BANF1	-16.9528552874853	3.3213054691609e-22	significant
TMEM9B	-8.27261891249042	9.51934029834778e-09	significant
EIF1AD	-2.322350214311	0.0665156910624581	non-significant
EIF3F	-20.4858598179972	4.63298685594798e-46	significant
POLD4	-9.32101658152939	7.14457632192206e-10	significant
DRAP1	-16.9218217310872	4.80318964902312e-37	significant
C11orf68	-15.0106555425998	2.51044948366539e-19	significant
PAAF1	-5.4955332814143	0.000237355461517758	significant
RAB6A	-10.3364881454269	1.07729061257158e-14	significant
CCDC85B	-9.55318353241599	3.29917499341547e-11	significant
CSTF3	-2.37495787502037	0.0383335868721731	significant
COX8A	-4.99482062531613	1.60349989881414e-06	significant
FAM89B	-12.2850355097236	1.3657603358765e-20	significant
DEAF1	-7.04140985833855	1.95861365692503e-07	significant
RHOG	-10.3088595430566	5.40558112016224e-08	significant
TALDO1	-16.0235834528482	6.82889433070506e-15	significant
GATD1	-1.89185952795265	0.13769200670603	non-significant
RPLP2	5.15540025351855	4.73750237970101e-07	significant
PNPLA2	-12.8102484824462	6.30628947533052e-19	significant
CRACR2B	-5.30628958659523	0.000300019150184822	significant
CD151	-39.6722606484445	4.52155436753779e-133	significant
POLR2L	8.2165307906346	4.93524644938117e-15	significant
CHID1	-8.10913756630991	1.43020637563668e-10	significant
BET1L	-3.33551636677875	0.00871624992108882	significant
RIC8A	-9.44816410679282	2.10133337854341e-12	significant
SPTY2D1	-2.37159309808085	0.0413804891634545	significant
COA4	-9.0212970427171	1.56660500423064e-07	significant
MOB2	-13.3546006387414	8.69278577494287e-14	significant
C11orf54	-5.36648891225857	4.11290454461403e-05	significant
SRPRA	-6.56632333982624	4.36917484574454e-06	significant
CADM1	-6.51445574545391	6.98999950549779e-08	significant
AP2A2	-5.91683997671238	4.07135470228801e-06	significant
DENND5A	-14.7177261769316	1.12969183336057e-26	significant
TSSC4	-10.298493760522	6.57177750167525e-10	significant
DUSP8	-5.28876467163028	5.35908636109459e-05	significant
WT1	-7.0825556186903	1.97529195202916e-08	significant
INTS5	-5.06973809750786	0.000463750781343277	significant
SIGIRR	-5.59624333782188	0.0247223282810288	significant
TMEM179B	-8.42362439198566	9.29841372810583e-09	significant
IRF7	-0.941517260616149	0.51906073281059	non-significant
PSMD13	-15.8813712724566	7.8226905368202e-27	significant
BCL9L	-5.08175279559755	2.91280361922016e-05	significant
BACE1	-2.26301321007575	0.0579235364268614	non-significant
ARAP1	-8.95440354958389	2.023919501936e-12	significant
ZFP91	-6.85830885494011	4.07309727980338e-07	significant
TEAD1	-5.85463714201133	1.6170823150399e-06	significant
ZBTB44	-3.76501010226301	0.001630900912012	significant
TRAPPC4	-15.9356132635981	1.44594609056566e-14	significant
ARHGEF12	-6.12830134868796	1.28631918722744e-06	significant
MRPL21	-7.15683461372624	2.56259754002478e-10	significant
BCO2	-5.37775942681288	0.000110198355992072	significant
FAR1	-3.11056830189426	0.0109454881102259	significant
PARVA	-7.231095035917	5.41047180052751e-09	significant
SVIP	-3.84127494726961	0.000426904910326069	significant
CTNND1	-12.7916337947464	9.07670423442084e-22	significant
CTR9	-4.64410841648803	0.000220706501118897	significant
SDHD	-22.2278255645387	6.46120289836688e-51	significant
UQCC3	-2.18979148499783	0.0526025521344608	non-significant
LGR4	-12.4810492173172	2.17325779698281e-23	significant
IPO7	-7.43765886166153	8.64720661725996e-10	significant
NAP1L4	-14.9740892105862	1.02199199760074e-24	significant
SELENOH	-6.53397204797035	7.29213277300908e-08	significant
ST13P5	-43.0623356854009	0.000829847159535547	significant
ARL2	-16.194148622145	6.78348412797929e-27	significant
TMX2	-11.41458096538	4.84017701923259e-13	significant
NDUFS3	-14.6229711347748	7.63555644698563e-31	significant
TSPAN4	-6.74788143848055	2.68690208261112e-07	significant
PPME1	-12.4721049336699	2.31168158436518e-10	significant
STARD10	-9.15494680316357	1.41440880085777e-05	significant
HNRNPUL2	-5.75977948702717	3.43490394283393e-06	significant
FADS3	-8.96153918255256	5.62481825292082e-10	significant
C1QTNF5	-1.43428392196675	0.371905185502972	non-significant
RPS28P7	14.045944388301	3.02394855321929e-27	significant
FABP5P7	-3.97439637417699	0.155540373411197	non-significant
ZBED5	-8.33315891399214	5.23433777093923e-06	significant
RPL37P2	6.25782890411071	1.77287188388598e-07	significant
MIR210HG	-1.43346995466507	0.274785030662178	non-significant
ZBED5-AS1	-4.11171921528356	0.00129954063941307	significant
RBM14-RBM4	-11.782446390104	2.95270843965502e-19	significant
MALAT1	-4.84598516763335	7.72925794987854e-05	significant
HSPB2-C11orf52	-18.753980715122	5.15511993336488e-47	significant
NAV2-AS2	-3.10884880017867	0.00808084396538411	significant
AP5B1	-9.80517246746806	0.0620979370185558	non-significant
EEF1G	-99.1638292511911	0	significant
DPP3	-4.31243622548615	0.00238042598826767	significant
FXYD6-FXYD2	-30.6149147991381	1.08314304809458e-77	significant
MIR100HG	-4.82212358690244	1.81947322336986e-05	significant
SNHG1	-7.90277682917394	9.64469973749986e-06	significant
HMBS	-5.78469745670839	8.6462118274197e-05	significant
SPON1	-10.7176128615959	2.98835571246052e-17	significant
C11orf98	-2.1302491763978	0.0429670133930666	significant
