# Supplementary material
Source: HighWire-hosted journal article supplement (doi:10.1101/rna.079727.123)
Supplement: Supplementary_Table_10.xlsx [file Supplementary_Table_10.xlsx]

## Sheet: all
gene	statistic	pval	marker
BAD	14.208796487031	3.0009261679976e-32	significant
ZNF195	-2.00735672327544	0.0639552731348173	non-significant
TMEM132A	2.24493524721556	0.0321264705118109	significant
ALDH3B1	-0.327416775459213	0.775985429267938	non-significant
USH1C	2.22853472565124	0.0323441516742065	significant
PIK3C2A	1.22762340598945	0.232572580718145	non-significant
POLA2	2.88143330910313	0.00782611175254279	significant
CAPN1	4.0519021531688	9.89646458628577e-05	significant
PHLDB1	3.88004715877013	0.000292094845777	significant
PRDM11	1.30084405862572	0.21000396864128	non-significant
SYT13	3.67535571550588	0.00056618880732248	significant
MRE11	-0.393943971084314	0.711245427490781	non-significant
PLEKHB1	2.28617370973801	0.0335173073456991	significant
OSBPL5	0.484596642133017	0.63608361978803	non-significant
GRAMD1B	-2.40554584526872	0.0614691175998212	non-significant
RNH1	10.1391353072136	1.4281638708661e-19	significant
NR1H3	1.55547803281664	0.165351818847979	non-significant
NUP160	-1.05292780873112	0.301734826026328	non-significant
GAB2	0.0111588392180642	0.991219246137597	non-significant
USP2	2.00024371136191	0.0516668587262195	non-significant
MED17	0.877781308386124	0.390196706622629	non-significant
USP28	4.07881416276711	7.36544345573572e-05	significant
RSF1	2.65439020906624	0.0152466334249934	significant
RCN1	0.767342577412552	0.444339802168633	non-significant
DKK3	8.32343914251891	1.07416252478107e-15	significant
TTC17	1.94536207745071	0.0637633333410023	non-significant
KCNQ1	3.30662278025103	0.00140577000025651	significant
FAM168A	2.07827805959687	0.0457192489369121	significant
RELT	0.526692591713646	0.687412363635624	non-significant
QSER1	0.371452749883238	0.712408052983444	non-significant
DGAT2	1.08261605649557	0.310790744802212	non-significant
TSPAN32	4.92055878378436	0.0624379317300969	non-significant
MPPED2	2.20336319639374	0.0337436485876179	significant
RASGRP2	7.34951644533657	7.32022328200402e-07	significant
PPP2R5B	4.95386392183442	0.00104449474529248	significant
PYGM	5.50559005319092	2.91635139291314e-07	significant
PHRF1	1.31260449406218	0.221825431950759	non-significant
NUCB2	5.79581033847719	1.30121999043384e-07	significant
MARK2	2.64049841456937	0.0125805409444317	significant
PICALM	2.45514102046113	0.0159157268713508	significant
CLNS1A	2.12150064286888	0.0369670780180733	significant
EED	0.487591988192489	0.630575660358552	non-significant
TSG101	9.81397064229043	5.00587466738794e-18	significant
ACAT1	11.1888968895913	4.97680899175313e-24	significant
REXO2	10.1652466318214	2.41929767399861e-18	significant
RBM7	0.862106503251125	0.396663763984822	non-significant
FAM76B	1.73379188464916	0.179075647480132	non-significant
POLD3	1.41082228218373	0.176115893398629	non-significant
NAALAD2	1.47885663808461	0.248477061303196	non-significant
ACER3	6.98214897182548	0.000460990203018554	significant
TOLLIP	3.3824071667057	0.0012608561319474	significant
IGSF9B	2.52440000703237	0.0185705076340524	significant
PGR	0.934834658391256	0.443212543415648	non-significant
GSTP1	23.6293378961364	2.86355385346168e-92	significant
APLP2	8.99597565930664	1.27364211049485e-17	significant
CD59	7.12824088505651	4.8943140112471e-12	significant
CD82	1.49274452944481	0.164418978315916	non-significant
CTTN	1.6566522951579	0.106629767174344	non-significant
WNT11	1.61886432222466	0.133991899550303	non-significant
ZW10	2.35405184021879	0.031164573506386	significant
ALG9	2.91963243435983	0.00713049874471064	significant
MTMR2	1.30939279424052	0.199629848957812	non-significant
SF3B2	6.04749223342088	1.26500937251939e-08	significant
AAMDC	13.2138584673683	1.30700399993826e-29	significant
GANAB	2.67694727405729	0.00827108191566184	significant
ARCN1	4.66300955169585	9.21466226576085e-06	significant
RASSF7	-0.628519237935042	0.563270753944838	non-significant
CRYAB	66.9336011628832	0	significant
CTSC	2.68341189615846	0.00980833734936128	significant
CCDC34	5.63472388497423	1.97252146075959e-07	significant
ZBTB16	-0.734890768652151	0.494793244764694	non-significant
ELP4	3.21492846969368	0.00602988634303216	significant
ZPR1	1.15335197077301	0.254920723726362	non-significant
MTCH2	3.84008648483253	0.000162330650177946	significant
FNBP4	3.11858043529831	0.00512107080306974	significant
SC5D	5.85191601199314	3.64317843572021e-07	significant
HSPA8	0.406389888802936	0.684619785469186	non-significant
VWA5A	0.474895701451575	0.638716045590611	non-significant
DNAJC4	7.29844916476721	1.8368243249426e-11	significant
SIAE	-0.478571609947897	0.662069726478393	non-significant
SNX15	3.2362486156382	0.00315939667719398	significant
LPXN	1.44010407380458	0.209423914409493	non-significant
DTX4	-0.138228603982097	0.903298610372146	non-significant
ATG2A	1.295627270831	0.229652713884925	non-significant
EHD1	3.30347966244317	0.0015275645506376	significant
OSBP	3.25876122198641	0.00217064176366816	significant
UNC93B1	1.08561662762398	0.322110022127995	non-significant
PUS3	1.87507008739644	0.115658871319482	non-significant
DCPS	5.49890377348951	2.55574457663208e-06	significant
KMT5B	2.66532117710684	0.0118010283939262	significant
FOXRED1	3.62516376335911	0.000947892385686503	significant
PPP6R3	1.38272746148304	0.171798580031616	non-significant
NRXN2	-2.07761006853212	0.129300098668086	non-significant
ST3GAL4	6.29252850488954	6.76125705936865e-09	significant
CPT1A	1.13521454426698	0.285159888164516	non-significant
CCND1	3.85601263718446	0.000174189966748445	significant
CCDC86	-0.554709913790874	0.584773660648603	non-significant
PRPF19	5.3576389359892	1.265945564564e-06	significant
TMEM109	5.73656470570206	2.03805010475637e-07	significant
TRIM3	-0.0858894151952085	0.933682168367489	non-significant
CHORDC1	-2.32883018074216	0.0298279391777104	significant
ANAPC15	3.22026655177988	0.00357028244959039	significant
PANX1	1.38679137703579	0.201301686353045	non-significant
ARHGEF17	2.24314852716907	0.0276155170639176	significant
CEP164	0.479704281840825	0.68722524050102	non-significant
RNF141	1.47148418747763	0.161026664981368	non-significant
EIF4G2	9.44886359592964	6.92053151856999e-20	significant
GALNT18	2.87185397498434	0.0214589196947439	significant
BIRC2	2.92422085435894	0.00660417210316968	significant
UBE4A	2.07874013129325	0.0495015074163928	significant
DDX6	2.8766047791161	0.00504629372607157	significant
CBL	2.30703974702717	0.0415310013886019	significant
NECTIN1	3.59428063646417	0.000901528310682633	significant
HIPK3	5.6931033668859	5.13775712941191e-08	significant
FBXO3	1.86500645348624	0.0662188908511789	non-significant
PDHX	1.84145009107339	0.0699436486447301	non-significant
COMMD9	4.90322826923799	6.1250534665249e-06	significant
MDK	51.2488670063626	0	significant
AMBRA1	5.18796343870648	2.65565105734713e-07	significant
MADD	2.97340936535331	0.00687430992412324	significant
PTPMT1	5.00642333644904	2.39491949153749e-06	significant
NAA40	2.9337125169412	0.00794299250372915	significant
SLC22A18	4.47581393369412	4.56921621050455e-05	significant
CD81	18.6210540130331	1.6324742816904e-65	significant
C11orf21	0.40347269083944	0.743047507511594	non-significant
C11orf58	3.49547892374124	0.000555336741446647	significant
PITPNM1	1.42120382753891	0.164623752284961	non-significant
RPS13	20.8955037570122	8.89804358716914e-90	significant
AIP	10.0473591497589	2.3821120062206e-18	significant
NUP98	2.68801855547192	0.0178542149305647	significant
NDUFS8	26.7803104284232	3.63943707115127e-102	significant
TCIRG1	1.52106597279676	0.346115946053348	non-significant
CHKA	0.964480988860896	0.34981716012737	non-significant
HPS5	-0.389971630553692	0.718222745892352	non-significant
GTF2H1	0.594752008823588	0.555872476810696	non-significant
CTSD	8.58028090477143	1.79045055166119e-15	significant
KMT2A	1.33004825828974	0.208688942439209	non-significant
IFT46	4.69749047669986	0.000128382812651455	significant
APOA1	7.50529390878112	9.7431642265129e-08	significant
RPS25	37.8821751497268	1.49464009294572e-197	significant
SPCS2	2.19371375646972	0.0305765028121375	significant
USP35	3.06539042784967	0.0095060131696527	significant
SNX19	2.16700974068148	0.0367746206806963	significant
KCNJ5	5.19134686499488	2.43765781765209e-06	significant
MSANTD2	0.709474025942689	0.525593030920579	non-significant
KIF18A	-0.187683985683477	0.860260906194237	non-significant
CRY2	3.56184600254033	0.000593049489731122	significant
PEX16	1.43087731552835	0.168323692798902	non-significant
CAT	3.47421082596088	0.00099618512063747	significant
KBTBD4	2.21083778175007	0.0380254696666916	significant
MYRF	2.06545096508588	0.0588722165700439	non-significant
AHNAK	5.73090415025471	2.23071907986808e-08	significant
FRMD8	1.41745680094042	0.180241391180164	non-significant
PRDX5	16.8902006268553	1.09229342942077e-51	significant
COPB1	3.36987412060888	0.00107486273514428	significant
PSMA1	3.67194538117348	0.000314067078883607	significant
SERGEF	4.83592634204271	0.000250545506757418	significant
CSRP3	42.2796408676857	2.02665228849777e-307	significant
E2F8	1.44293020771978	0.171442304442457	non-significant
CDKN1C	2.18410011449586	0.0350180862701147	significant
STK33	2.66101270022822	0.0116811298195307	significant
H19	4.94762757583477	8.33114644140323e-07	significant
PPFIA1	0.364852170158946	0.721676704474091	non-significant
TRIM21	3.65338952262217	0.00390512830248024	significant
ARFIP2	5.07855408448374	1.0103958297183e-05	significant
TRIM5	0.89171699546221	0.399938306831956	non-significant
RRP8	4.15415966050479	0.000300491971490052	significant
TIMM10B	3.26931300822022	0.00208566801804209	significant
IGHMBP2	-0.52645276515087	0.609664136442397	non-significant
TESMIN	2.72443007943038	0.0370186110576772	significant
MACROD1	10.2898808111673	1.18225943817901e-19	significant
WDR74	4.00380175454616	0.000361125395900985	significant
RTN3	0.376013771283914	0.707166347127981	non-significant
SWAP70	3.19105935014754	0.00811971562858008	significant
SBF2	1.87931246801383	0.088335851921327	non-significant
MICAL2	3.98775641383811	0.000163092161778105	significant
RRAS2	-0.485961306509473	0.629568718028352	non-significant
DPF2	0.00661607669437804	0.994739281625253	non-significant
MEN1	0.710441238424962	0.499153896298867	non-significant
LDHA	-2.21222283295427	0.0271057773765274	significant
MYBPC3	12.1229350659059	8.8654022413824e-32	significant
DDB2	2.50862239499168	0.0793160205554498	non-significant
ACP2	0.540665605309351	0.593553501975913	non-significant
DAGLA	2.4691482744557	0.0900779733162934	non-significant
TIMM10	9.07383327926451	3.94284099362418e-12	significant
FADS2	6.55347809762113	2.98865654179121e-09	significant
TMEM258	27.9455085508558	9.91842053944605e-98	significant
ARHGAP32	1.721980738564	0.161006596453609	non-significant
STT3A	2.79388009906795	0.00697620378930096	significant
ADAMTS8	4.3459565668048	2.78731083547921e-05	significant
ETS1	4.41203166989442	0.00530273402606729	significant
LMO2	3.14773372474135	0.132430393541422	non-significant
PHF21A	2.93311178343434	0.00530545169872164	significant
NAT10	1.8264582484292	0.0908674959054187	non-significant
CAPRIN1	2.76206638509456	0.0064212799260429	significant
FCHSD2	2.29136953585484	0.0303995448890975	significant
ARRB1	1.16626404873153	0.257898275969296	non-significant
THAP12	-0.0708957545479598	0.944090855812405	non-significant
NUMA1	2.85033453584499	0.00515623802476982	significant
CCDC90B	1.64897869539264	0.103061010954481	non-significant
SYTL2	1.62442062011926	0.139622030876602	non-significant
RAB30	-0.374540621195152	0.720311484456462	non-significant
CREBZF	2.86215107755798	0.0101251816935792	significant
PRCP	2.49224355929312	0.0145794607533694	significant
NARS2	0.925890049668559	0.364111891615728	non-significant
RNF121	3.52634805576231	0.00101794919252399	significant
BUD13	3.31888480410157	0.00832441137059925	significant
DCUN1D5	5.5258629235437	6.03445490713212e-07	significant
YAP1	2.3113466944163	0.0229724173561169	significant
SLC37A4	1.33783561974341	0.199702143890104	non-significant
RDX	0.558330796163521	0.577811965965574	non-significant
FDX1	-0.676584735595674	0.500294177124381	non-significant
C11orf1	6.52530030932319	1.79434140567945e-07	significant
FXYD6	13.9035443573693	3.4211161947465e-38	significant
SIRT3	2.10072444684386	0.0420658411896902	significant
IFITM3	10.1182403963137	2.04497163181074e-20	significant
SCYL1	4.49733945006503	2.12516460469522e-05	significant
CDCA5	0.666474382970282	0.516275954461464	non-significant
BTBD10	-0.135040534377387	0.893186396863563	non-significant
ADM	1.78016020572088	0.112380470040875	non-significant
GAS2	0.972493348817065	0.361747339027475	non-significant
LIN7C	1.06488128603913	0.312736452980028	non-significant
IMMP1L	2.81681163279112	0.00857401044516326	significant
PGAP2	3.05310373964223	0.0552956685809511	non-significant
TUT1	1.37816963913376	0.196905512718885	non-significant
HSD17B12	1.13149812813075	0.261045149029692	non-significant
APIP	-3.71604473436423	0.000633487777229095	significant
DGKZ	2.54253016527646	0.0130878962025389	significant
EIF3M	7.46767286756591	2.46505265563741e-13	significant
TNKS1BP1	1.39319713933232	0.18212716790556	non-significant
SERPING1	1.94429462095413	0.137301777609973	non-significant
SSRP1	5.64561999376915	1.17449217948056e-07	significant
PTPRJ	1.96174702102424	0.0861362477304594	non-significant
ARFGAP2	7.60430136310535	4.46442695224821e-12	significant
CELF1	2.55917512908356	0.0159028711934755	significant
HIKESHI	1.4071652338214	0.161720317050352	non-significant
SESN3	1.00846951642496	0.320542670868686	non-significant
CCDC82	1.97147326076729	0.111984170769229	non-significant
SERPINH1	6.44324245204773	3.13028645599098e-10	significant
INTS4	2.01111166195025	0.0519126719619986	non-significant
PAK1	2.82538768452469	0.0513216343273227	non-significant
RPS3	5.27527233659378	1.40810658451656e-07	significant
ZC3H12C	0.833724838165316	0.418420929449376	non-significant
TTC12	2.96653036193502	0.0108454229059235	significant
NCAM1	7.58544064141466	2.20304809917844e-13	significant
NPAT	0.684573033697754	0.50419223095863	non-significant
ATM	1.42472913419453	0.170880007762068	non-significant
AASDHPPT	2.50112307415251	0.0139714824856561	significant
LAMTOR1	10.217078012803	7.34838497200948e-18	significant
HYOU1	2.26721352501044	0.0266763619939778	significant
TKFC	1.25830519166601	0.271966152076011	non-significant
MTA2	0.397138074423997	0.700250560243615	non-significant
TMEM138	3.38789572704451	0.00574267657538774	significant
FADS1	2.78282124943739	0.00634108101087194	significant
ROM1	1.37137272066279	0.222615837880657	non-significant
EML3	2.02697192351865	0.120220634922357	non-significant
CPSF7	2.81034764511413	0.00692384170841551	significant
B3GAT3	3.14578012908619	0.00355577953996172	significant
EI24	0.518996976640832	0.605075803472809	non-significant
CHEK1	1.29650100198581	0.229749587342656	non-significant
FEZ1	1.99825703008673	0.0567364080850903	non-significant
MPZL2	0.130251246143844	0.909245092569203	non-significant
SCN2B	-0.816122150425179	0.42529239349971	non-significant
SIDT2	3.08426291361546	0.00598442167672625	significant
TMEM25	3.45721407864391	0.00124297938385332	significant
TAGLN	8.81675022340153	1.61038524154904e-16	significant
LTO1	0.418919285603907	0.68986463186006	non-significant
TRPT1	8.801263118094	6.35622383679856e-14	significant
NUDT22	11.8769502184404	5.78158959902278e-23	significant
PLCB3	0.964278480529406	0.379897546237813	non-significant
MRPL49	-0.161057724489696	0.872444937469705	non-significant
FAU	82.0718864490266	0	significant
TM7SF2	3.97201697605872	0.000185244531539082	significant
VPS51	4.94354405265865	1.74049960261724e-06	significant
CWC15	11.4299642934722	2.80025795138842e-21	significant
TMEM218	-0.358572955091354	0.738654072032981	non-significant
DLG2	0.829908520891397	0.447772554758693	non-significant
PRSS23	2.52745301225577	0.0172352691531919	significant
DIXDC1	1.56868352573035	0.12560110907428	non-significant
DLAT	6.2991682988269	2.48884309398414e-09	significant
NKAPD1	1.75175944958142	0.092187505128729	non-significant
TIMM8B	6.66664691697044	2.04018249465985e-10	significant
PTS	11.1947099504316	1.10908721469477e-12	significant
UEVLD	1.96672401958307	0.0771094143741114	non-significant
TMEM86A	-0.935647496233616	0.386972718162375	non-significant
EXT2	2.5463535358764	0.0156194033439362	significant
NDUFC2	28.7248180960269	3.48875433880737e-106	significant
ME3	1.90968443518471	0.124498479669199	non-significant
ACAD8	3.94110463076346	0.000268327372026105	significant
THYN1	8.85150637784742	3.46674483044758e-14	significant
VPS26B	1.46389802170323	0.146605528998477	non-significant
NCAPD3	0.452315452316244	0.668727435346043	non-significant
ARL14EP	1.61139931812127	0.113791835333417	non-significant
GUCY1A2	2.74922197983197	0.0106110398398875	significant
CWF19L2	4.00748913062513	0.0849250819358181	non-significant
TMEM123	7.15044348492307	3.47922089657594e-11	significant
THY1	-0.803583025766677	0.440475287389686	non-significant
TBCEL	2.76869184360151	0.0153384215201973	significant
TBRG1	0.518327140424524	0.615120523373894	non-significant
UBE2L6	7.03292946141151	4.272539678614e-11	significant
ZDHHC5	1.97598320960517	0.0551316251849955	non-significant
MED19	9.04866265721191	5.09452638413273e-11	significant
TSPAN18	3.91288544102313	0.000241737823843942	significant
CREB3L1	3.0019179147219	0.0215406341856514	significant
MRPL17	8.78884447726213	5.33332811091244e-16	significant
EMSY	1.73038599129898	0.110363133357931	non-significant
ALG8	1.71982292846225	0.107725262772872	non-significant
SIK3	-0.469242008979409	0.640493194954934	non-significant
PCSK7	2.67630423511563	0.0111183121184748	significant
VPS11	1.11387964409227	0.281095572401991	non-significant
NLRX1	1.70465638754794	0.116371268433887	non-significant
CLPB	1.18931864453239	0.282609860262851	non-significant
NEU3	0.411000426441366	0.686597692943975	non-significant
CYB561A3	0.809583550413179	0.458985201002391	non-significant
ASRGL1	3.45650457710759	0.00867502837261201	significant
UBXN1	10.5227736938008	3.67499458518731e-20	significant
LBHD1	5.34512342627663	7.92753479626955e-07	significant
TTC9C	6.20555266593954	1.95347900705363e-06	significant
TAF6L	0.900949645688604	0.379018329021854	non-significant
NXF1	2.22098889739142	0.0317755525679731	significant
STX5	5.5282755874278	4.49480531231232e-07	significant
SYVN1	56.273570949639	0	significant
ZFPL1	3.89166622660633	0.000265180614498804	significant
RPS6KA4	2.14296496607353	0.0446006541609456	significant
LRP5	1.29493163254306	0.208074535889792	non-significant
TPCN2	2.25498749099137	0.200492253313642	non-significant
FAT3	0.809026953247545	0.458300647111506	non-significant
INPPL1	3.78364738623598	0.000258810772698597	significant
DDIAS	-2.14536674819227	0.150545474543173	non-significant
PCF11	1.7865136848825	0.0959384921359574	non-significant
RPUSD4	1.98326592996108	0.074166813582022	non-significant
ARHGAP42	1.63344425951088	0.145210128645783	non-significant
PACSIN3	6.05289991421332	1.79206438157042e-08	significant
SLC39A13	4.24367393551668	5.70300813345801e-05	significant
PSMC3	6.4323211983215	8.24176711647963e-10	significant
NELL1	5.96294908480259	0.00366049594437789	significant
SMCO4	2.91847656462071	0.0155336311798784	significant
CEP295	1.16848656666485	0.300793217252879	non-significant
TAF1D	2.07571192501553	0.0431552450797884	significant
ABTB2	1.28182569918828	0.226605183502806	non-significant
AMOTL1	1.64097812470597	0.151570554343212	non-significant
CEP57	1.91043720411078	0.0597104915898689	non-significant
JAM3	3.13860916929795	0.00468294326139526	significant
ADAMTS15	2.94957077545887	0.00477042043173723	significant
API5	-0.34835339906732	0.728604891141342	non-significant
ALKBH3	-0.425934025101772	0.69061465679024	non-significant
ZNF202	0.920029474557107	0.403243604788353	non-significant
CUL5	1.75331539287005	0.0868498296663438	non-significant
SMPD1	4.3550818402035	9.85010582352278e-05	significant
APBB1	8.28312760673454	2.49651330633457e-14	significant
TRIM44	4.13516835559287	0.000109476406858957	significant
ILK	8.03575657508003	3.38891200083276e-14	significant
TAF10	7.71777361581129	2.74859194336061e-12	significant
TPP1	2.73481625389264	0.00998661142288251	significant
DCHS1	2.06079899451674	0.0543632900602926	non-significant
TUB	3.98553955621732	0.00293394162659357	significant
RNF169	1.55183529894818	0.15032266722332	non-significant
RPL27A	36.2759054334982	1.78769796690487e-247	significant
AKIP1	2.67685452048385	0.0110593415363222	significant
TMEM41B	0.658969934805801	0.514155642451716	non-significant
ZNF143	2.01316775161211	0.0795924932530853	non-significant
WEE1	3.41369618795301	0.000735570935969985	significant
TMEM135	2.4926333503548	0.0292540855832282	significant
PLEKHA7	15.4136295787832	2.15122025034139e-51	significant
NNMT	4.80958868465994	0.000517154592583079	significant
FAM111A	-0.747908772552647	0.520919618440017	non-significant
NAV2	2.23190525557636	0.0322691381622026	significant
PATL1	1.36512141192454	0.182372561283312	non-significant
STX3	-0.0418793727759834	0.968266374616508	non-significant
MRPL16	9.97838967319268	5.27019519584232e-17	significant
IGF2	15.0913970132139	1.98472571762112e-44	significant
RNF214	3.65984755399568	0.00755150995489554	significant
ATP5MG	15.2406745168495	8.1724174872441e-47	significant
STIM1	1.966167221617	0.0577218674548525	non-significant
RRM1	1.98579400933378	0.0498069846644452	significant
TRIM68	2.17671643193608	0.053014301387439	non-significant
OTUB1	7.23591735548692	7.39618268629268e-11	significant
RCOR2	3.08370652516096	0.00698680595994734	significant
NDUFV1	13.8141626502551	6.96913944942793e-36	significant
CDK2AP2	0.592164065021861	0.555456177882353	non-significant
NUDT8	3.84688245199783	0.000837639507801861	significant
SDHAF2	8.72357020483824	3.99124913315874e-13	significant
DDB1	7.10386066474118	1.29514565057622e-11	significant
VPS37C	1.23782028868938	0.231319267784046	non-significant
RAB3IL1	1.28543605922565	0.278939400674457	non-significant
FTH1	13.1018991895167	4.57300460476256e-38	significant
BSCL2	3.17517614141559	0.00324764476519256	significant
POLR2G	12.6997605267648	2.71481790685648e-27	significant
SLC3A2	4.40751812133209	4.78735868028173e-05	significant
SPINDOC	1.87333048653988	0.0949664371342617	non-significant
ATG16L2	0.803322845821554	0.518976891572166	non-significant
C2CD3	-0.991887623588916	0.36987091705716	non-significant
FADD	2.59979758128343	0.018405025606794	significant
LTBP3	4.31127762980319	3.49500787494673e-05	significant
SAC3D1	3.00438758480607	0.00492505733377794	significant
SF1	5.37663290196448	3.6919084099035e-07	significant
MAP4K2	2.65791340573691	0.0310071952089665	significant
PAFAH1B2	0.692582070892793	0.493428420742391	non-significant
STIP1	2.09121351106214	0.0379704683973591	significant
FEN1	3.20237537659755	0.00318510126556871	significant
TMEM223	7.52072651449714	2.38364145362307e-11	significant
ANKRD49	-0.212725208267043	0.836987499100861	non-significant
METTL15	0.286752175505124	0.776833893626789	non-significant
SIK2	1.38839100732974	0.172539082924962	non-significant
USP47	2.34287787208668	0.0220557252549413	significant
HSPB2	23.3062015596918	5.36901834486422e-80	significant
SLN	3.89119071661399	0.159089784394979	non-significant
NFRKB	1.48307677837802	0.151396659390931	non-significant
SYT9	2.00303350411619	0.0814301255064661	non-significant
MSANTD4	0.688303455280292	0.494568515523157	non-significant
DNAJC24	2.91894415563061	0.00673133168719302	significant
CAVIN3	9.07493635328857	8.08057608478659e-14	significant
PDGFD	3.16910167426987	0.0021088410942447	significant
C11orf24	1.69037987288771	0.106121792330924	non-significant
TMEM126A	10.650368280615	8.85296883099834e-19	significant
TMEM126B	10.8277482330503	6.92027698971187e-19	significant
MAP6	0.373959877959628	0.716759771087957	non-significant
ANO5	2.0989110837004	0.0412963739361189	significant
C1QTNF4	2.95287782867458	0.200755775967204	non-significant
DPAGT1	1.55660656217091	0.133020115094231	non-significant
HINFP	2.26993735422093	0.0345684524857104	significant
C2CD2L	2.01128072062802	0.137314800555364	non-significant
CLP1	1.483994334799	0.161481626747745	non-significant
FIBP	8.19284613915214	2.20762945529146e-13	significant
PPP1CA	6.40318005573099	2.42871038136679e-09	significant
RAD9A	1.57532950603162	0.141543629142545	non-significant
EFEMP2	8.94404888738108	7.64258119829306e-17	significant
TMEM134	11.7584079271712	1.3255155113954e-22	significant
CORO1B	0.958204698000545	0.346866476057671	non-significant
MUS81	3.50180835482129	0.00117471902676257	significant
CFL1	6.43913054031912	1.75863034259675e-10	significant
SSH3	2.14711142548344	0.0560290976265989	non-significant
NADSYN1	0.863983468870034	0.400364312169277	non-significant
DHCR7	2.7960499644262	0.00850698102349418	significant
RNASEH2C	6.35261298180846	5.20796081084457e-09	significant
ANKRD13D	1.24367266102567	0.256298074243252	non-significant
MRGPRF	11.7634160016456	0.016104687635806	significant
KAT5	3.75543589194797	0.000550420635983984	significant
GRK2	2.65863139156599	0.00998176250987711	significant
RELA	1.76630302779154	0.0809479923839384	non-significant
TRMT112	10.2243153192655	2.33361167164708e-20	significant
KDM2A	-0.0694731016130315	0.945380729024356	non-significant
ESRRA	2.97505387096892	0.00398098869232511	significant
RHOD	8.03704692089052	1.83620308126259e-11	significant
GPR137	3.05599328663696	0.00402238884836743	significant
MAP3K11	2.27013661373372	0.0321895029453188	significant
EHBP1L1	1.34575687553635	0.196150876255605	non-significant
RNF26	1.72845843624807	0.110048509134789	non-significant
PPP1R14B	4.3900051117905	1.93390665488579e-05	significant
FKBP2	11.9587823947997	1.82275427099922e-23	significant
VEGFB	16.8559135147428	3.25234653071224e-51	significant
PC	1.52361774911628	0.251957622676519	non-significant
LRFN4	2.85303773363805	0.00883713423141481	significant
RCE1	3.39321831578046	0.00567281040646523	significant
C11orf80	3.24374665861858	0.0151434571188854	significant
RBM4B	0.169913224921751	0.866924728591193	non-significant
RBM4	2.38171266180019	0.0193277595580219	significant
CCS	7.90739554194087	5.2893300216672e-11	significant
CTSF	3.33744347421657	0.00211377484820524	significant
ZDHHC24	2.43471757822193	0.0532135192867889	non-significant
ZNHIT2	2.86151456871063	0.00784478706770513	significant
BBS1	1.87991817450185	0.0885906264147679	non-significant
PELI3	1.81900727365985	0.0923573101223181	non-significant
MRPL11	3.75100827415508	0.000311730393315399	significant
SLC29A2	1.85560381652591	0.0704964678060886	non-significant
B4GAT1	3.864334521311	0.000188364311830173	significant
BRMS1	3.20015857863058	0.00353095791644318	significant
HRAS	6.57284202167289	3.28120969881343e-08	significant
CD248	-0.700079687739685	0.515436481738527	non-significant
YIF1A	6.92184040158312	6.40177676659604e-10	significant
CNIH2	2.74083799319498	0.0159679474467875	significant
RAB1B	-0.389373187169922	0.697437083975619	non-significant
PTDSS2	3.78734001672361	0.000461984026627754	significant
KLC2	0.285512811361803	0.777355612532363	non-significant
TRAF6	1.43943927562093	0.160900281428556	non-significant
PACS1	4.13089638392178	6.90813100810263e-05	significant
ZNF408	2.67352337802541	0.0277304519837242	significant
CKAP5	2.8979236172843	0.0046774179841165	significant
ARHGAP1	4.04537727303537	0.000168713011628452	significant
ATG13	2.37247666080232	0.0223409485118522	significant
GAL3ST3	1.76579076098423	0.102036016469348	non-significant
TP53I11	2.9211822847334	0.00699662663455323	significant
BANF1	6.73893948864307	1.26408095584306e-10	significant
TMEM9B	4.98331941257637	1.04614876741375e-05	significant
EIF1AD	3.50656348729632	0.00189749330476704	significant
EIF3F	1.62405089599914	0.105697343595397	non-significant
SART1	3.14525432767263	0.00315572779244771	significant
POLD4	7.8591557093347	5.42976088015959e-09	significant
LIPT2	2.22627917296212	0.0767561649978384	non-significant
DRAP1	14.2521836390047	1.55169109666239e-32	significant
UCP2	2.46984162782449	0.0274009930974479	significant
C11orf68	5.06178049179292	2.84674630496208e-06	significant
PAAF1	1.29457608568146	0.20654418349882	non-significant
MRPL48	2.77097584467121	0.00827772857253346	significant
RAB6A	0.892769465945701	0.3741495642447	non-significant
CCDC85B	10.7409924537127	1.05681794565257e-19	significant
RPS6KB2	2.98163209439525	0.00554797623064797	significant
CSTF3	1.38807714491432	0.172965619794049	non-significant
TCP11L1	2.27669794672246	0.16320084818373	non-significant
COX8A	88.9724216119094	0	significant
BDNF	1.72891021642245	0.125278767936593	non-significant
FIBIN	1.29010084396276	0.237456623038358	non-significant
FAM89B	1.92075313415871	0.0576185490775821	non-significant
DEAF1	3.88115061917665	0.000239457608772768	significant
TMEM80	4.01781589161861	0.000708086389882328	significant
ZDHHC13	2.14170111994465	0.0610038805298864	non-significant
RHOG	4.19283265547096	0.00014649707138275	significant
EPS8L2	3.84202451230913	0.0009514042138664	significant
TALDO1	6.96413767083999	6.10477307782191e-11	significant
GATD1	5.20929495105998	1.48596326972361e-05	significant
PIDD1	3.23529186335792	0.0127294276639197	significant
RPLP2	96.4438437569846	0	significant
PNPLA2	6.44108843498129	2.59595176592512e-09	significant
CRACR2B	1.53368332988373	0.154570878335131	non-significant
CD151	16.6905762422579	1.1184803358916e-50	significant
POLR2L	29.1303368642132	1.35017217322165e-121	significant
CHID1	6.85880799125514	8.44747922844439e-10	significant
BET1L	1.56622961855046	0.125241672816401	non-significant
RIC8A	6.17978032506162	1.13792985586694e-08	significant
DDX10	0.677789574714318	0.514434157425016	non-significant
SPTY2D1	2.15902548866008	0.0646253795831022	non-significant
GVQW3	-0.123808644797117	0.913079611638025	non-significant
LDLRAD3	1.50830714387189	0.155799761806315	non-significant
FJX1	1.48590147376826	0.159461287017709	non-significant
C11orf71	0.0720828927670223	0.948764308606997	non-significant
SLC36A4	2.62113553951245	0.0271880101805371	significant
OR51E1	0.300356016987462	0.784473016784371	non-significant
SLC35C1	1.54135557677264	0.144353215051269	non-significant
COA4	13.8868065545814	1.63645022125356e-24	significant
MOB2	6.34795176036321	1.56616599954533e-08	significant
KCNA4	0.20296213444955	0.841118278867827	non-significant
KBTBD3	3.52185187246549	0.00178381321612265	significant
TSKU	2.55347841329263	0.0153432845492683	significant
C11orf54	3.61461349233503	0.000933220895078256	significant
SRPRA	1.18672822829105	0.239633509842839	non-significant
CADM1	2.94133203585176	0.00382294381628086	significant
AP2A2	0.975239151707062	0.333386514019149	non-significant
FANCF	0.733946480726979	0.467897624546706	non-significant
WT1-AS	1.41123619200501	0.277753493329734	non-significant
JRKL	1.59776174194454	0.19939513432472	non-significant
DENND5A	4.9325305921065	1.62359155380063e-06	significant
LRTOMT	0.848246978011878	0.457499277628181	non-significant
OAF	1.34248336100831	0.213906385023086	non-significant
TSSC4	4.3071222621183	7.53954746021242e-05	significant
DUSP8	3.65769147074711	0.000786255998415269	significant
OR7E14P	-2.48936623692781	0.152457925435052	non-significant
ATL3	1.61807301180431	0.24641746293554	non-significant
WT1	3.17217423770215	0.00320029793996602	significant
INTS5	4.10908344038018	0.000434894471735899	significant
SIGIRR	3.15323910555333	0.00976924722200567	significant
IFITM2	11.7368880505818	8.54700726361966e-24	significant
PRMT3	1.04859643220529	0.31239977901572	non-significant
TMEM179B	4.54601668776436	2.35939433194448e-05	significant
PSMD13	7.29448040800656	3.52806016513225e-11	significant
ZBTB3	2.3225417520936	0.0950636106159708	non-significant
IFITM1	6.21861393744979	7.12664333667802e-08	significant
CYP2R1	0.480483088340388	0.649531824226919	non-significant
BCL9L	0.814487171672639	0.429680072150856	non-significant
BACE1	1.84552006732882	0.0732842000516183	non-significant
ARAP1	7.34413142683134	6.37935268274966e-12	significant
ZFP91	1.70213336073989	0.0930144959064908	non-significant
TMEM216	5.28819741659069	0.00395855712075109	significant
TEAD1	1.33707679889189	0.184195632655911	non-significant
LUZP2	1.14203734654694	0.387990926522315	non-significant
C11orf96	10.2784939553598	6.80780261203461e-06	significant
KCNJ11	3.53208017711185	0.00414575159622826	significant
KCTD21	1.21439098125352	0.267460914449957	non-significant
FAM111B	0.0380937802467055	0.970582546474536	non-significant
ZBTB44	3.35070645177553	0.00156713304988163	significant
TRAPPC4	7.55298598887569	4.40791986240289e-11	significant
ARHGEF12	3.8381853623662	0.000288489420346938	significant
CASP4	11.9017786589213	0.00698565092125655	significant
PCNX3	1.88606822552333	0.0819031698301708	non-significant
MRPL21	9.15454790478207	4.04647492796119e-16	significant
BCO2	3.72141568805458	0.000369482114873882	significant
FAR1	1.91912467209655	0.0636265542328541	non-significant
PARVA	3.91838639998208	0.000246179203931155	significant
FAM118B	4.1554983090846	0.000289701327995346	significant
SVIP	3.21982944459846	0.00212931506351121	significant
HYLS1	1.0908184612552	0.318552013310959	non-significant
UVRAG	1.75258459272007	0.104628623866732	non-significant
CTNND1	0.722056979477828	0.471490787549721	non-significant
CTR9	2.56377294106729	0.0199422922971205	significant
MIR210	3.01508830292258	0.0293145948331602	significant
SDHD	-0.442070635353959	0.658834444832995	non-significant
UQCC3	3.12145661960121	0.00289583804997004	significant
LGR4	6.03527817149043	6.47231865770318e-09	significant
IPO7	0.82002896446166	0.413561079705056	non-significant
NAP1L4	3.69045646923604	0.000293970686166778	significant
SELENOH	13.3907157424137	1.81019151885996e-28	significant
SIPA1	1.19267476133288	0.24323605328321	non-significant
ARL2	10.9443574304951	9.58833414768198e-22	significant
TMX2	1.98903173498565	0.0488778314177233	significant
NDUFS3	15.5853874074827	3.42026514733211e-41	significant
MRPL23	10.5182744420129	3.78287871055636e-18	significant
TSPAN4	3.08473308602778	0.00311966336027226	significant
PPME1	4.78515104845199	8.99666621202607e-06	significant
STARD10	7.40518629418635	5.40407958625775e-11	significant
HNRNPUL2	4.50624914065219	1.92332459600777e-05	significant
CSKMT	2.43343559332208	0.0398647827208158	significant
FADS3	1.69259252517515	0.101064048499152	non-significant
RPS28P7	41.7278185790708	2.6223538156009e-211	significant
FABP5P7	1.98040662358915	0.0597023001911527	non-significant
ZBED5	5.24709337097365	2.1021992668822e-06	significant
RBM14	3.22704532297139	0.0025938755588881	significant
RPL37P2	3.61720753741227	0.000476546419564194	significant
IFITM10	1.55869438000303	0.163030635183177	non-significant
USP2-AS1	0.889038161524784	0.458915284488607	non-significant
NEAT1	4.94057980873002	0.000497814780683624	significant
KCTD21-AS1	0.707456549486022	0.53440624342694	non-significant
SBF2-AS1	3.47259481732294	0.131738658339316	non-significant
MIR210HG	2.06213959215439	0.058898618440754	non-significant
ZBED5-AS1	1.70125483562013	0.110192136179658	non-significant
MALAT1	2.86939922895286	0.00582298995569271	significant
HSPB2-C11orf52	23.4845858768646	4.15055338477511e-81	significant
OR7E11P	0.152823666575331	0.89377722233934	non-significant
NAV2-AS2	4.18253694757159	0.000231081603225333	significant
AP5B1	1.99888213609851	0.0631313140866982	non-significant
EEF1G	-4.21624619718616	2.53421902244466e-05	significant
DPP3	1.83234445210954	0.0916635292733752	non-significant
FXYD6-FXYD2	13.8137481768164	8.28677730609461e-38	significant
MIR100HG	3.56863216288445	0.000725863997199227	significant
UVRAG-DT	2.64241452927686	0.230170604417152	non-significant
FDXACB1	4.02834275259506	0.0202465223416092	significant
SNHG1	4.98638868290482	2.15152379014331e-05	significant
HMBS	5.51666617560469	1.24477870914649e-05	significant
SPON1	2.34001399140557	0.0233323995931551	significant
SRSF8	1.48769464404567	0.144137273646711	non-significant
C11orf98	5.25304957971112	1.1568265373967e-06	significant
BACE1-AS	2.32594071591507	0.129601372924803	non-significant
GSEC	1.32169425300112	0.228371386548959	non-significant

## Sheet: no_decision
gene	statistic	pval	marker
BAD	14.208796487031	3.0009261679976e-32	significant
ZNF195	-2.07967001352989	0.0621930020829626	non-significant
TMEM132A	2.24493524721556	0.0321264705118109	significant
ALDH3B1	-0.327416775459213	0.775985429267938	non-significant
USH1C	2.22853472565124	0.0323441516742065	significant
PIK3C2A	1.22762340598945	0.232572580718145	non-significant
POLA2	2.88143330910313	0.00782611175254279	significant
CAPN1	4.0519021531688	9.89646458628577e-05	significant
PHLDB1	3.88004715877013	0.000292094845777	significant
PRDM11	1.30084405862572	0.21000396864128	non-significant
SYT13	3.67535571550588	0.00056618880732248	significant
PLEKHB1	2.28617370973801	0.0335173073456991	significant
OSBPL5	0.484596642133017	0.63608361978803	non-significant
GRAMD1B	-2.40554584526872	0.0614691175998212	non-significant
RNH1	10.1391353072136	1.4281638708661e-19	significant
NR1H3	1.55547803281664	0.165351818847979	non-significant
NUP160	0.383912493683371	0.715042529890012	non-significant
GAB2	0.0111588392180642	0.991219246137597	non-significant
USP2	2.00024371136191	0.0516668587262195	non-significant
MED17	0.877781308386124	0.390196706622629	non-significant
USP28	4.07881416276711	7.36544345573572e-05	significant
RSF1	2.65439020906624	0.0152466334249934	significant
RCN1	3.03867537214593	0.00363646188119339	significant
DKK3	8.32343914251891	1.07416252478107e-15	significant
TTC17	1.94536207745071	0.0637633333410023	non-significant
KCNQ1	3.30662278025103	0.00140577000025651	significant
FAM168A	2.07827805959687	0.0457192489369121	significant
RELT	0.526692591713646	0.687412363635624	non-significant
QSER1	0.0928274505534788	0.926571107632929	non-significant
DGAT2	1.08261605649557	0.310790744802212	non-significant
TSPAN32	4.92055878378436	0.0624379317300969	non-significant
MPPED2	2.20336319639374	0.0337436485876179	significant
RASGRP2	7.34951644533657	7.32022328200402e-07	significant
PPP2R5B	4.95386392183442	0.00104449474529248	significant
PYGM	5.50559005319092	2.91635139291314e-07	significant
PHRF1	1.31260449406218	0.221825431950759	non-significant
NUCB2	6.20982299186032	2.41669595660238e-08	significant
MARK2	2.64049841456937	0.0125805409444317	significant
PICALM	2.45514102046113	0.0159157268713508	significant
CLNS1A	3.60047455152625	0.000914512774015296	significant
EED	1.23379413899502	0.249890573337242	non-significant
TSG101	9.81397064229043	5.00587466738794e-18	significant
ACAT1	11.1888968895913	4.97680899175313e-24	significant
REXO2	10.1652466318214	2.41929767399861e-18	significant
RBM7	1.39254552554405	0.199402955288424	non-significant
FAM76B	1.73379188464916	0.179075647480132	non-significant
POLD3	1.41082228218373	0.176115893398629	non-significant
NAALAD2	1.47885663808461	0.248477061303196	non-significant
ACER3	6.98214897182548	0.000460990203018554	significant
TOLLIP	3.3824071667057	0.0012608561319474	significant
IGSF9B	2.52440000703237	0.0185705076340524	significant
PGR	0.934834658391256	0.443212543415648	non-significant
GSTP1	27.5793044912824	2.93001505322931e-108	significant
APLP2	8.99597565930664	1.27364211049485e-17	significant
CD59	7.12824088505651	4.8943140112471e-12	significant
CD82	1.49274452944481	0.164418978315916	non-significant
CTTN	1.6566522951579	0.106629767174344	non-significant
WNT11	1.61886432222466	0.133991899550303	non-significant
ZW10	2.35405184021879	0.031164573506386	significant
ALG9	2.91963243435983	0.00713049874471064	significant
MTMR2	1.30939279424052	0.199629848957812	non-significant
SF3B2	6.04749223342088	1.26500937251939e-08	significant
AAMDC	13.3921914461602	4.43261076209974e-30	significant
GANAB	3.33321958179229	0.0011683472413246	significant
ARCN1	4.56313118099223	1.39435948769699e-05	significant
RASSF7	-0.628519237935042	0.563270753944838	non-significant
CRYAB	66.9336011628832	0	significant
CTSC	2.68341189615846	0.00980833734936128	significant
CCDC34	5.72816038557184	1.50907222515592e-07	significant
ZBTB16	-0.734890768652151	0.494793244764694	non-significant
ELP4	3.21492846969368	0.00602988634303216	significant
ZPR1	1.872534485056	0.0737170748945245	non-significant
MTCH2	4.95469183710031	2.00961413375919e-06	significant
FNBP4	3.11858043529831	0.00512107080306974	significant
SC5D	5.85191601199314	3.64317843572021e-07	significant
HSPA8	8.56325709993877	3.19973638002896e-15	significant
VWA5A	0.474895701451575	0.638716045590611	non-significant
DNAJC4	7.29844916476721	1.8368243249426e-11	significant
SIAE	-0.478571609947897	0.662069726478393	non-significant
SNX15	3.2362486156382	0.00315939667719398	significant
LPXN	1.44010407380458	0.209423914409493	non-significant
DTX4	-0.138228603982097	0.903298610372146	non-significant
ATG2A	1.295627270831	0.229652713884925	non-significant
EHD1	3.30347966244317	0.0015275645506376	significant
OSBP	3.25876122198641	0.00217064176366816	significant
UNC93B1	1.31092428628049	0.259150494500854	non-significant
PUS3	1.87507008739644	0.115658871319482	non-significant
DCPS	5.49890377348951	2.55574457663208e-06	significant
KMT5B	2.66532117710684	0.0118010283939262	significant
FOXRED1	3.62516376335911	0.000947892385686503	significant
PPP6R3	1.76555496320541	0.084466620022087	non-significant
NRXN2	-2.07761006853212	0.129300098668086	non-significant
ST3GAL4	6.29252850488954	6.76125705936865e-09	significant
CPT1A	1.13521454426698	0.285159888164516	non-significant
CCND1	3.85601263718446	0.000174189966748445	significant
CCDC86	0.193536745606495	0.851815588009597	non-significant
PRPF19	5.46755748394135	8.90898228720073e-07	significant
TMEM109	5.73656470570206	2.03805010475637e-07	significant
TRIM3	-0.0858894151952085	0.933682168367489	non-significant
CHORDC1	0.323269162541254	0.757905395083522	non-significant
ANAPC15	4.83420110677384	0.000315470331017946	significant
PANX1	1.38679137703579	0.201301686353045	non-significant
ARHGEF17	2.24314852716907	0.0276155170639176	significant
CEP164	0.479704281840825	0.68722524050102	non-significant
RNF141	1.27762221360574	0.227603140612341	non-significant
EIF4G2	9.7415856137236	6.97812266045967e-21	significant
GALNT18	3.15220733624374	0.0172754599558263	significant
BIRC2	2.92422085435894	0.00660417210316968	significant
UBE4A	2.52607844174348	0.0225608724845495	significant
DDX6	3.43146927709664	0.00110146318338473	significant
CBL	2.30703974702717	0.0415310013886019	significant
NECTIN1	3.59428063646417	0.000901528310682633	significant
HIPK3	5.6931033668859	5.13775712941191e-08	significant
FBXO3	4.05446593002956	0.000393017587306586	significant
PDHX	3.38991088503977	0.00152355556987687	significant
COMMD9	4.90322826923799	6.1250534665249e-06	significant
MDK	51.2488670063626	0	significant
AMBRA1	9.73526736932131	3.10603945065686e-20	significant
MADD	2.97340936535331	0.00687430992412324	significant
PTPMT1	5.00642333644904	2.39491949153749e-06	significant
NAA40	2.9337125169412	0.00794299250372915	significant
SLC22A18	4.47581393369412	4.56921621050455e-05	significant
CD81	18.5719578608743	3.30534332996866e-65	significant
C11orf21	0.40347269083944	0.743047507511594	non-significant
C11orf58	7.73688853940606	1.60460816631822e-12	significant
PITPNM1	1.42120382753891	0.164623752284961	non-significant
RPS13	21.0416413411396	9.6334425773897e-75	significant
AIP	10.0473591497589	2.3821120062206e-18	significant
NUP98	2.68801855547192	0.0178542149305647	significant
NDUFS8	26.7803104284232	3.63943707115127e-102	significant
TCIRG1	1.52106597279676	0.346115946053348	non-significant
CHKA	0.964480988860896	0.34981716012737	non-significant
HPS5	-0.389971630553692	0.718222745892352	non-significant
GTF2H1	1.03923970906221	0.309745901247898	non-significant
CTSD	8.58028090477143	1.79045055166119e-15	significant
KMT2A	1.33004825828974	0.208688942439209	non-significant
IFT46	4.69749047669986	0.000128382812651455	significant
APOA1	7.50529390878112	9.7431642265129e-08	significant
RPS25	56.2236826526308	3.18058642300886e-226	significant
SPCS2	5.04648540540451	8.75766867707349e-06	significant
USP35	3.06539042784967	0.0095060131696527	significant
SNX19	2.02821665295252	0.0507184408401849	non-significant
KCNJ5	5.19134686499488	2.43765781765209e-06	significant
KIF18A	-0.187683985683477	0.860260906194237	non-significant
CRY2	3.56184600254033	0.000593049489731122	significant
PEX16	1.43087731552835	0.168323692798902	non-significant
CAT	3.47421082596088	0.00099618512063747	significant
KBTBD4	2.21083778175007	0.0380254696666916	significant
MYRF	2.06545096508588	0.0588722165700439	non-significant
AHNAK	5.73090415025471	2.23071907986808e-08	significant
FRMD8	1.57549740249203	0.142238091163469	non-significant
PRDX5	20.9766315961138	5.18872309578986e-69	significant
COPB1	3.44697468007165	0.00083937794781522	significant
PSMA1	5.86949686192314	1.12586605611646e-07	significant
SERGEF	4.83592634204271	0.000250545506757418	significant
CSRP3	42.2815088309165	2.11034208838421e-307	significant
E2F8	1.44293020771978	0.171442304442457	non-significant
CDKN1C	2.18410011449586	0.0350180862701147	significant
STK33	2.66101270022822	0.0116811298195307	significant
H19	16.2688365910926	4.58761119396399e-49	significant
PPFIA1	0.364852170158946	0.721676704474091	non-significant
TRIM21	3.65338952262217	0.00390512830248024	significant
ARFIP2	5.07855408448374	1.0103958297183e-05	significant
TRIM5	1.26134613083886	0.276002727858096	non-significant
RRP8	4.15415966050479	0.000300491971490052	significant
TIMM10B	3.26931300822022	0.00208566801804209	significant
IGHMBP2	-0.52645276515087	0.609664136442397	non-significant
TESMIN	2.72443007943038	0.0370186110576772	significant
MACROD1	10.2898808111673	1.18225943817901e-19	significant
WDR74	4.00380175454616	0.000361125395900985	significant
RTN3	5.64633515709872	2.68318826633178e-07	significant
SWAP70	3.19105935014754	0.00811971562858008	significant
SBF2	1.87931246801383	0.088335851921327	non-significant
MICAL2	3.98775641383811	0.000163092161778105	significant
RRAS2	0.966358736003801	0.35066005561087	non-significant
DPF2	1.43570243008617	0.162065278804943	non-significant
MEN1	0.710441238424962	0.499153896298867	non-significant
LDHA	12.1004835863669	3.06383623124259e-29	significant
MYBPC3	12.1229350659059	8.8654022413824e-32	significant
DDB2	2.50862239499168	0.0793160205554498	non-significant
ACP2	0.540665605309351	0.593553501975913	non-significant
DAGLA	2.4691482744557	0.0900779733162934	non-significant
TIMM10	9.07383327926451	3.94284099362418e-12	significant
FADS2	6.75857375292649	1.30848102366652e-09	significant
TMEM258	27.9455085508558	9.91842053944605e-98	significant
ARHGAP32	1.721980738564	0.161006596453609	non-significant
STT3A	2.79388009906795	0.00697620378930096	significant
ADAMTS8	4.33356746237902	2.95914864833603e-05	significant
ETS1	4.41203166989442	0.00530273402606729	significant
LMO2	3.14773372474135	0.132430393541422	non-significant
PHF21A	2.93311178343434	0.00530545169872164	significant
NAT10	2.06718596831236	0.0689099619193961	non-significant
CAPRIN1	3.58062457755392	0.000545831595381592	significant
FCHSD2	2.29136953585484	0.0303995448890975	significant
ARRB1	1.16626404873153	0.257898275969296	non-significant
THAP12	0.62738716891969	0.538993210448531	non-significant
NUMA1	2.85033453584499	0.00515623802476982	significant
CCDC90B	2.67286423106308	0.0138010345268127	significant
SYTL2	1.62442062011926	0.139622030876602	non-significant
RAB30	-0.374540621195152	0.720311484456462	non-significant
CREBZF	2.86215107755798	0.0101251816935792	significant
PRCP	2.03829997038499	0.0450244424005098	significant
NARS2	0.925890049668559	0.364111891615728	non-significant
RNF121	3.52634805576231	0.00101794919252399	significant
BUD13	3.31888480410157	0.00832441137059925	significant
DCUN1D5	5.5258629235437	6.03445490713212e-07	significant
YAP1	3.54650224436162	0.000809672200102284	significant
SLC37A4	1.33783561974341	0.199702143890104	non-significant
RDX	2.6519537897159	0.0109013910776868	significant
FDX1	1.81630608210777	0.0812683749763242	non-significant
C11orf1	6.52530030932319	1.79434140567945e-07	significant
FXYD6	13.3506821424406	2.00006476846781e-35	significant
SIRT3	2.10072444684386	0.0420658411896902	significant
IFITM3	16.8425299775084	2.89371282234791e-34	significant
SCYL1	4.49733945006503	2.12516460469522e-05	significant
CDCA5	0.666474382970282	0.516275954461464	non-significant
BTBD10	2.28725940055153	0.0388295721820282	significant
ADM	1.78016020572088	0.112380470040875	non-significant
GAS2	0.972493348817065	0.361747339027475	non-significant
LIN7C	1.06488128603913	0.312736452980028	non-significant
IMMP1L	2.64522322005539	0.0168017048769758	significant
PGAP2	3.05310373964223	0.0552956685809511	non-significant
TUT1	1.37816963913376	0.196905512718885	non-significant
HSD17B12	3.08897700084379	0.00424879526825782	significant
APIP	-1.26388835596735	0.276864152947714	non-significant
DGKZ	3.17815365931955	0.00261064238410338	significant
EIF3M	12.3012185740048	1.14084154792744e-29	significant
TNKS1BP1	1.39319713933232	0.18212716790556	non-significant
SERPING1	1.94429462095413	0.137301777609973	non-significant
SSRP1	5.64561999376915	1.17449217948056e-07	significant
PTPRJ	2.3140325131288	0.058244400212494	non-significant
ARFGAP2	7.60430136310535	4.46442695224821e-12	significant
CELF1	3.70566838554135	0.00146423022135989	significant
HIKESHI	6.81436982557395	1.36638686573755e-08	significant
SESN3	1.28132165368672	0.213899616983154	non-significant
CCDC82	1.97147326076729	0.111984170769229	non-significant
SERPINH1	7.79069409032444	1.02005406521637e-13	significant
INTS4	2.31863330974764	0.0283174806268409	significant
PAK1	2.82538768452469	0.0513216343273227	non-significant
RPS3	34.5600043996335	6.56343468257853e-178	significant
ZC3H12C	0.833724838165316	0.418420929449376	non-significant
TTC12	2.96653036193502	0.0108454229059235	significant
NCAM1	7.60334196170947	1.96958234325082e-13	significant
NPAT	0.684573033697754	0.50419223095863	non-significant
ATM	1.42472913419453	0.170880007762068	non-significant
AASDHPPT	3.9096604236405	0.000237594111049638	significant
LAMTOR1	10.217078012803	7.34838497200948e-18	significant
HYOU1	2.74979746807146	0.00810048805200272	significant
TKFC	1.25830519166601	0.271966152076011	non-significant
MTA2	0.397138074423997	0.700250560243615	non-significant
TMEM138	3.38789572704451	0.00574267657538774	significant
FADS1	2.80005729608672	0.00605373349427175	significant
ROM1	1.37137272066279	0.222615837880657	non-significant
EML3	2.02697192351865	0.120220634922357	non-significant
CPSF7	2.81034764511413	0.00692384170841551	significant
B3GAT3	4.55253089607843	9.57498217733764e-05	significant
EI24	1.72644982810894	0.0891852251102473	non-significant
CHEK1	1.29650100198581	0.229749587342656	non-significant
FEZ1	1.99825703008673	0.0567364080850903	non-significant
MPZL2	0.130251246143844	0.909245092569203	non-significant
SCN2B	-0.816122150425179	0.42529239349971	non-significant
SIDT2	3.08426291361546	0.00598442167672625	significant
TMEM25	3.45721407864391	0.00124297938385332	significant
TAGLN	10.6540997964677	1.06969569725927e-21	significant
LTO1	0.418919285603907	0.68986463186006	non-significant
TRPT1	8.801263118094	6.35622383679856e-14	significant
NUDT22	11.8769502184404	5.78158959902278e-23	significant
PLCB3	0.964278480529406	0.379897546237813	non-significant
MRPL49	1.21941151829887	0.230134581370243	non-significant
FAU	106.39290723085	0	significant
TM7SF2	3.97201697605872	0.000185244531539082	significant
VPS51	4.94354405265865	1.74049960261724e-06	significant
CWC15	11.4299642934722	2.80025795138842e-21	significant
TMEM218	-0.358572955091354	0.738654072032981	non-significant
DLG2	0.829908520891397	0.447772554758693	non-significant
PRSS23	2.52745301225577	0.0172352691531919	significant
DIXDC1	2.15160006652872	0.0416766208797743	significant
DLAT	6.2991682988269	2.48884309398414e-09	significant
NKAPD1	1.75175944958142	0.092187505128729	non-significant
TIMM8B	6.71490738300067	6.78538373366585e-10	significant
PTS	11.1947099504316	1.10908721469477e-12	significant
UEVLD	1.96672401958307	0.0771094143741114	non-significant
TMEM86A	-0.935647496233616	0.386972718162375	non-significant
EXT2	2.5463535358764	0.0156194033439362	significant
NDUFC2	28.7248180960269	3.48875433880737e-106	significant
ME3	1.90968443518471	0.124498479669199	non-significant
ACAD8	3.83086516373857	0.000385254715345801	significant
THYN1	8.85150637784742	3.46674483044758e-14	significant
VPS26B	2.0754905157154	0.0420216064379361	significant
NCAPD3	0.452315452316244	0.668727435346043	non-significant
ARL14EP	2.24784138770573	0.0344221588722304	significant
GUCY1A2	2.74922197983197	0.0106110398398875	significant
CWF19L2	4.00748913062513	0.0849250819358181	non-significant
TMEM123	7.15044348492307	3.47922089657594e-11	significant
THY1	-0.803583025766677	0.440475287389686	non-significant
TBCEL	2.76869184360151	0.0153384215201973	significant
TBRG1	0.518327140424524	0.615120523373894	non-significant
UBE2L6	7.03292946141151	4.272539678614e-11	significant
ZDHHC5	1.97598320960517	0.0551316251849955	non-significant
MED19	9.04866265721191	5.09452638413273e-11	significant
TSPAN18	3.91288544102313	0.000241737823843942	significant
CREB3L1	3.0019179147219	0.0215406341856514	significant
MRPL17	8.78884447726213	5.33332811091244e-16	significant
EMSY	1.73038599129898	0.110363133357931	non-significant
ALG8	1.71982292846225	0.107725262772872	non-significant
SIK3	1.3102760233653	0.196935607814744	non-significant
PCSK7	2.67630423511563	0.0111183121184748	significant
VPS11	1.11387964409227	0.281095572401991	non-significant
NLRX1	1.70465638754794	0.116371268433887	non-significant
CLPB	1.18931864453239	0.282609860262851	non-significant
NEU3	0.411000426441366	0.686597692943975	non-significant
CYB561A3	0.809583550413179	0.458985201002391	non-significant
ASRGL1	3.45650457710759	0.00867502837261201	significant
UBXN1	10.5227736938008	3.67499458518731e-20	significant
LBHD1	5.25147443614592	2.89539356047922e-06	significant
TTC9C	6.20555266593954	1.95347900705363e-06	significant
TAF6L	0.900949645688604	0.379018329021854	non-significant
NXF1	2.22098889739142	0.0317755525679731	significant
STX5	5.5282755874278	4.49480531231232e-07	significant
SYVN1	55.2090990971837	0	significant
ZFPL1	3.89166622660633	0.000265180614498804	significant
RPS6KA4	2.14296496607353	0.0446006541609456	significant
LRP5	1.29493163254306	0.208074535889792	non-significant
TPCN2	2.25498749099137	0.200492253313642	non-significant
FAT3	0.809026953247545	0.458300647111506	non-significant
INPPL1	3.78364738623598	0.000258810772698597	significant
DDIAS	-2.14536674819227	0.150545474543173	non-significant
PCF11	1.7865136848825	0.0959384921359574	non-significant
RPUSD4	1.98326592996108	0.074166813582022	non-significant
ARHGAP42	1.42634344033503	0.206042635325945	non-significant
PACSIN3	6.05289991421332	1.79206438157042e-08	significant
SLC39A13	4.24367393551668	5.70300813345801e-05	significant
PSMC3	8.28118024974676	2.87829123523444e-14	significant
NELL1	5.96294908480259	0.00366049594437789	significant
SMCO4	5.63092829209419	8.34122485817429e-05	significant
CEP295	1.16848656666485	0.300793217252879	non-significant
TAF1D	3.19803218944444	0.00367539875964623	significant
ABTB2	1.28182569918828	0.226605183502806	non-significant
AMOTL1	1.64097812470597	0.151570554343212	non-significant
CEP57	1.55076262565843	0.125417909236982	non-significant
JAM3	3.13860916929795	0.00468294326139526	significant
ADAMTS15	2.94957077545887	0.00477042043173723	significant
API5	1.3732813648995	0.184944313528177	non-significant
ALKBH3	-0.425934025101772	0.69061465679024	non-significant
ZNF202	0.920029474557107	0.403243604788353	non-significant
CUL5	2.16358414717042	0.0376179757695171	significant
SMPD1	4.3550818402035	9.85010582352278e-05	significant
APBB1	8.28312760673454	2.49651330633457e-14	significant
TRIM44	4.13516835559287	0.000109476406858957	significant
ILK	8.03575657508003	3.38891200083276e-14	significant
TAF10	7.67100034482927	4.38089162508976e-12	significant
TPP1	2.73481625389264	0.00998661142288251	significant
DCHS1	2.06079899451674	0.0543632900602926	non-significant
TUB	4.89662932738871	0.00103480574732004	significant
RNF169	1.55183529894818	0.15032266722332	non-significant
RPL27A	40.2409257834085	1.18208930890816e-228	significant
AKIP1	2.14531842722747	0.0400637201389854	significant
TMEM41B	1.17877616848346	0.252169071604125	non-significant
ZNF143	2.83718662540797	0.0255747001636451	significant
WEE1	3.35072750289814	0.00100675845966324	significant
TMEM135	2.4926333503548	0.0292540855832282	significant
PLEKHA7	16.9576873057384	1.12151425641304e-58	significant
NNMT	4.80958868465994	0.000517154592583079	significant
FAM111A	-0.747908772552647	0.520919618440017	non-significant
NAV2	2.23190525557636	0.0322691381622026	significant
PATL1	1.19504720369038	0.241875982434418	non-significant
STX3	-0.0418793727759834	0.968266374616508	non-significant
MRPL16	9.97838967319268	5.27019519584232e-17	significant
IGF2	15.156666713376	1.02563871840789e-44	significant
RNF214	3.65984755399568	0.00755150995489554	significant
ATP5MG	17.514364930206	1.56345360694055e-49	significant
STIM1	1.966167221617	0.0577218674548525	non-significant
RRM1	1.98579400933378	0.0498069846644452	significant
TRIM68	2.17671643193608	0.053014301387439	non-significant
OTUB1	7.23591735548692	7.39618268629268e-11	significant
RCOR2	3.08370652516096	0.00698680595994734	significant
NDUFV1	13.8326299564189	6.205352627886e-36	significant
CDK2AP2	2.0772152042076	0.0494315307475205	significant
NUDT8	3.84688245199783	0.000837639507801861	significant
SDHAF2	8.72357020483824	3.99124913315874e-13	significant
DDB1	7.0043416037415	2.33649916560207e-11	significant
VPS37C	1.23782028868938	0.231319267784046	non-significant
RAB3IL1	1.28543605922565	0.278939400674457	non-significant
FTH1	42.1839143000448	5.67027734977014e-240	significant
BSCL2	3.17517614141559	0.00324764476519256	significant
POLR2G	12.6997605267648	2.71481790685648e-27	significant
SLC3A2	4.40751812133209	4.78735868028173e-05	significant
SPINDOC	1.87333048653988	0.0949664371342617	non-significant
ATG16L2	0.803322845821554	0.518976891572166	non-significant
C2CD3	-1.27490475334779	0.268059935635571	non-significant
FADD	2.59979758128343	0.018405025606794	significant
LTBP3	4.31127762980319	3.49500787494673e-05	significant
SAC3D1	3.00438758480607	0.00492505733377794	significant
SF1	5.37663290196448	3.6919084099035e-07	significant
MAP4K2	2.65791340573691	0.0310071952089665	significant
PAFAH1B2	1.29343616082405	0.204340598934181	non-significant
STIP1	3.63793206294003	0.000443218850338546	significant
FEN1	3.75916505822736	0.00081416732959393	significant
TMEM223	7.26914462238788	9.66637710104181e-11	significant
ANKRD49	-2.13204304610867	0.0862746529621739	non-significant
METTL15	1.19232188633523	0.277331888940431	non-significant
SIK2	1.56854783944046	0.124873999506842	non-significant
USP47	2.0960904234099	0.0394935689312634	significant
HSPB2	23.2383975059273	1.4530284658212e-79	significant
SLN	3.89119071661399	0.159089784394979	non-significant
NFRKB	1.48307677837802	0.151396659390931	non-significant
SYT9	2.00303350411619	0.0814301255064661	non-significant
MSANTD4	0.688303455280292	0.494568515523157	non-significant
DNAJC24	3.24602336035628	0.0039700492318649	significant
CAVIN3	9.07493635328857	8.08057608478659e-14	significant
PDGFD	3.16910167426987	0.0021088410942447	significant
C11orf24	1.69037987288771	0.106121792330924	non-significant
TMEM126A	8.2246913447056	1.78331766736177e-11	significant
TMEM126B	10.8708718184564	6.90672052664922e-19	significant
MAP6	0.373959877959628	0.716759771087957	non-significant
ANO5	2.0989110837004	0.0412963739361189	significant
C1QTNF4	2.95287782867458	0.200755775967204	non-significant
DPAGT1	1.55660656217091	0.133020115094231	non-significant
HINFP	2.26993735422093	0.0345684524857104	significant
C2CD2L	2.01128072062802	0.137314800555364	non-significant
CLP1	1.483994334799	0.161481626747745	non-significant
FIBP	8.32639963366933	1.12957424583944e-13	significant
PPP1CA	6.40318005573099	2.42871038136679e-09	significant
RAD9A	1.57532950603162	0.141543629142545	non-significant
EFEMP2	8.94404888738108	7.64258119829306e-17	significant
TMEM134	11.7584079271712	1.3255155113954e-22	significant
CORO1B	0.958204698000545	0.346866476057671	non-significant
MUS81	3.50180835482129	0.00117471902676257	significant
CFL1	13.8190453645773	2.32572054380662e-35	significant
SSH3	2.14711142548344	0.0560290976265989	non-significant
NADSYN1	0.863983468870034	0.400364312169277	non-significant
DHCR7	2.7960499644262	0.00850698102349418	significant
RNASEH2C	6.35261298180846	5.20796081084457e-09	significant
ANKRD13D	1.24367266102567	0.256298074243252	non-significant
MRGPRF	11.7634160016456	0.016104687635806	significant
KAT5	3.75543589194797	0.000550420635983984	significant
GRK2	2.65863139156599	0.00998176250987711	significant
RELA	1.7833709650671	0.0807228330300499	non-significant
TRMT112	18.4985605040996	1.70361861656775e-37	significant
KDM2A	-0.0694731016130315	0.945380729024356	non-significant
ESRRA	4.36572057351072	6.77659916777029e-05	significant
RHOD	8.03704692089052	1.83620308126259e-11	significant
GPR137	3.05599328663696	0.00402238884836743	significant
MAP3K11	2.27013661373372	0.0321895029453188	significant
EHBP1L1	1.34575687553635	0.196150876255605	non-significant
RNF26	1.72845843624807	0.110048509134789	non-significant
PPP1R14B	7.79543484459157	6.09513191892961e-12	significant
FKBP2	11.9587823947997	1.82275427099922e-23	significant
VEGFB	16.8559135147428	3.25234653071224e-51	significant
PC	1.52361774911628	0.251957622676519	non-significant
LRFN4	2.85303773363805	0.00883713423141481	significant
RCE1	3.39321831578046	0.00567281040646523	significant
C11orf80	3.24374665861858	0.0151434571188854	significant
RBM4B	0.300076100447678	0.770504347058858	non-significant
RBM4	4.82523526374601	1.95573456660891e-05	significant
CCS	7.90739554194087	5.2893300216672e-11	significant
CTSF	3.33744347421657	0.00211377484820524	significant
ZDHHC24	2.43471757822193	0.0532135192867889	non-significant
ZNHIT2	2.86151456871063	0.00784478706770513	significant
BBS1	1.87991817450185	0.0885906264147679	non-significant
PELI3	1.81900727365985	0.0923573101223181	non-significant
MRPL11	6.01914612920912	1.6453391849013e-07	significant
SLC29A2	1.85560381652591	0.0704964678060886	non-significant
B4GAT1	3.864334521311	0.000188364311830173	significant
BRMS1	3.20015857863058	0.00353095791644318	significant
HRAS	6.57284202167289	3.28120969881343e-08	significant
CD248	-0.700079687739685	0.515436481738527	non-significant
YIF1A	6.92184040158312	6.40177676659604e-10	significant
CNIH2	2.74083799319498	0.0159679474467875	significant
RAB1B	3.40021699541806	0.00109103270853885	significant
PTDSS2	3.78734001672361	0.000461984026627754	significant
KLC2	0.285512811361803	0.777355612532363	non-significant
TRAF6	1.46673460889537	0.154337918534537	non-significant
PACS1	3.97213362468321	0.000124317627083641	significant
ZNF408	2.67352337802541	0.0277304519837242	significant
CKAP5	2.8979236172843	0.0046774179841165	significant
ARHGAP1	4.04537727303537	0.000168713011628452	significant
ATG13	2.37247666080232	0.0223409485118522	significant
GAL3ST3	1.76579076098423	0.102036016469348	non-significant
TP53I11	2.9211822847334	0.00699662663455323	significant
BANF1	10.1519094719736	1.94686117755584e-17	significant
TMEM9B	4.98331941257637	1.04614876741375e-05	significant
EIF1AD	3.50656348729632	0.00189749330476704	significant
EIF3F	7.37836217047268	2.71799915178592e-11	significant
SART1	3.14525432767263	0.00315572779244771	significant
POLD4	7.8591557093347	5.42976088015959e-09	significant
LIPT2	2.22627917296212	0.0767561649978384	non-significant
DRAP1	14.2521836390047	1.55169109666239e-32	significant
UCP2	2.46984162782449	0.0274009930974479	significant
C11orf68	5.06178049179292	2.84674630496208e-06	significant
PAAF1	2.60750573909054	0.0199804525750499	significant
MRPL48	3.66737848955269	0.00145216720020585	significant
RAB6A	2.87072428010646	0.00676732452519087	significant
CCDC85B	10.7409924537127	1.05681794565257e-19	significant
RPS6KB2	2.98163209439525	0.00554797623064797	significant
CSTF3	1.3722821432486	0.178289223657064	non-significant
TCP11L1	2.27669794672246	0.16320084818373	non-significant
COX8A	89.5947815517848	0	significant
BDNF	1.72891021642245	0.125278767936593	non-significant
FIBIN	1.29010084396276	0.237456623038358	non-significant
FAM89B	2.625495442433	0.0121758386100696	significant
DEAF1	3.94915822147029	0.00019494498160571	significant
TMEM80	3.99237216509164	0.000873412212572588	significant
ZDHHC13	2.14170111994465	0.0610038805298864	non-significant
RHOG	4.19283265547096	0.00014649707138275	significant
EPS8L2	3.8107801305695	0.00116091510832343	significant
TALDO1	9.13273801924391	3.24668213206005e-16	significant
GATD1	5.20929495105998	1.48596326972361e-05	significant
PIDD1	3.23529186335792	0.0127294276639197	significant
RPLP2	116.779118597046	0	significant
PNPLA2	6.44108843498129	2.59595176592512e-09	significant
CRACR2B	1.53368332988373	0.154570878335131	non-significant
CD151	16.6905762422579	1.1184803358916e-50	significant
POLR2L	29.0417905176231	6.56939088365658e-121	significant
CHID1	6.85880799125514	8.44747922844439e-10	significant
BET1L	1.56622961855046	0.125241672816401	non-significant
RIC8A	6.17978032506162	1.13792985586694e-08	significant
DDX10	1.85118048430671	0.160336485308392	non-significant
SPTY2D1	2.15902548866008	0.0646253795831022	non-significant
GVQW3	-0.123808644797117	0.913079611638025	non-significant
LDLRAD3	1.50830714387189	0.155799761806315	non-significant
FJX1	1.48590147376826	0.159461287017709	non-significant
C11orf71	0.0720828927670223	0.948764308606997	non-significant
SLC36A4	2.62113553951245	0.0271880101805371	significant
OR51E1	0.300356016987462	0.784473016784371	non-significant
SLC35C1	1.54135557677264	0.144353215051269	non-significant
COA4	13.8868065545814	1.63645022125356e-24	significant
MOB2	6.34795176036321	1.56616599954533e-08	significant
KCNA4	0.20296213444955	0.841118278867827	non-significant
KBTBD3	3.52185187246549	0.00178381321612265	significant
TSKU	2.55347841329263	0.0153432845492683	significant
C11orf54	3.61461349233503	0.000933220895078256	significant
SRPRA	1.18672822829105	0.239633509842839	non-significant
CADM1	2.74665581231757	0.00679255699248411	significant
AP2A2	0.975239151707062	0.333386514019149	non-significant
FANCF	0.509322588457649	0.613824076083385	non-significant
WT1-AS	1.41123619200501	0.277753493329734	non-significant
JRKL	1.59776174194454	0.19939513432472	non-significant
DENND5A	4.9325305921065	1.62359155380063e-06	significant
LRTOMT	0.848246978011878	0.457499277628181	non-significant
OAF	1.34248336100831	0.213906385023086	non-significant
TSSC4	4.3071222621183	7.53954746021242e-05	significant
DUSP8	3.65658188619614	0.000970816496457683	significant
OR7E14P	-1.37751521088842	0.359680999494743	non-significant
ATL3	1.61807301180431	0.24641746293554	non-significant
WT1	3.17217423770215	0.00320029793996602	significant
INTS5	4.10908344038018	0.000434894471735899	significant
SIGIRR	3.15323910555333	0.00976924722200567	significant
IFITM2	12.0096972484427	1.1534884908314e-20	significant
PRMT3	1.04859643220529	0.31239977901572	non-significant
TMEM179B	4.54601668776436	2.35939433194448e-05	significant
PSMD13	7.29448040800656	3.52806016513225e-11	significant
ZBTB3	2.3225417520936	0.0950636106159708	non-significant
IFITM1	5.8535219152665	8.55557002728658e-07	significant
CYP2R1	0.480483088340388	0.649531824226919	non-significant
BCL9L	0.814487171672639	0.429680072150856	non-significant
BACE1	1.84552006732882	0.0732842000516183	non-significant
ARAP1	7.34413142683134	6.37935268274966e-12	significant
ZFP91	1.89205788186956	0.0625193458217123	non-significant
TMEM216	5.28819741659069	0.00395855712075109	significant
TEAD1	1.91324107494106	0.0600607652635268	non-significant
LUZP2	1.14203734654694	0.387990926522315	non-significant
C11orf96	10.2784939553598	6.80780261203461e-06	significant
KCNJ11	3.53208017711185	0.00414575159622826	significant
KCTD21	1.21439098125352	0.267460914449957	non-significant
FAM111B	-0.162801852319094	0.876132835037266	non-significant
ZBTB44	4.2648693129539	0.000149227271847677	significant
TRAPPC4	7.55298598887569	4.40791986240289e-11	significant
ARHGEF12	3.8381853623662	0.000288489420346938	significant
CASP4	11.9017786589213	0.00698565092125655	significant
PCNX3	2.28541807276616	0.0412721148426284	significant
MRPL21	14.615089258847	1.46441903173878e-27	significant
BCO2	4.05351881544234	0.00012394308000187	significant
FAR1	2.2933333945939	0.0298023934471564	significant
PARVA	3.91838639998208	0.000246179203931155	significant
FAM118B	4.1554983090846	0.000289701327995346	significant
SVIP	3.21982944459846	0.00212931506351121	significant
HYLS1	1.0908184612552	0.318552013310959	non-significant
UVRAG	1.75258459272007	0.104628623866732	non-significant
CTNND1	1.4819877746294	0.142742118749714	non-significant
CTR9	2.56377294106729	0.0199422922971205	significant
MIR210	3.01508830292258	0.0293145948331602	significant
SDHD	4.27261280235223	6.84444174573045e-05	significant
UQCC3	3.12145661960121	0.00289583804997004	significant
LGR4	5.96152494360425	9.38705095969698e-09	significant
IPO7	1.90090357922776	0.0620451385866436	non-significant
NAP1L4	4.9403043180402	2.42803897371689e-06	significant
SELENOH	13.3907157424137	1.81019151885996e-28	significant
SIPA1	1.19267476133288	0.24323605328321	non-significant
ARL2	10.9443574304951	9.58833414768198e-22	significant
TMX2	5.38597201744941	1.71883656957335e-06	significant
NDUFS3	15.5853874074827	3.42026514733211e-41	significant
MRPL23	11.0367611863213	8.55835430397034e-19	significant
TSPAN4	3.08473308602778	0.00311966336027226	significant
PPME1	4.78515104845199	8.99666621202607e-06	significant
STARD10	7.40518629418635	5.40407958625775e-11	significant
HNRNPUL2	4.50624914065219	1.92332459600777e-05	significant
CSKMT	2.43343559332208	0.0398647827208158	significant
FADS3	1.69259252517515	0.101064048499152	non-significant
RPS28P7	51.8351819536777	3.61034172932362e-181	significant
FABP5P7	3.75667564336521	0.00461840438248772	significant
ZBED5	5.21077341711163	2.58751463124347e-06	significant
RBM14	3.22704532297139	0.0025938755588881	significant
RPL37P2	5.33302463480296	3.96030975582149e-07	significant
IFITM10	1.55869438000303	0.163030635183177	non-significant
USP2-AS1	0.889038161524784	0.458915284488607	non-significant
NEAT1	4.94057980873002	0.000497814780683624	significant
KCTD21-AS1	0.707456549486022	0.53440624342694	non-significant
SBF2-AS1	3.47259481732294	0.131738658339316	non-significant
MIR210HG	2.06213959215439	0.058898618440754	non-significant
ZBED5-AS1	1.70125483562013	0.110192136179658	non-significant
MALAT1	2.86939922895286	0.00582298995569271	significant
HSPB2-C11orf52	23.4175435183382	1.11930728017567e-80	significant
OR7E11P	0.785532922029404	0.566980336681186	non-significant
NAV2-AS2	4.18253694757159	0.000231081603225333	significant
AP5B1	2.34183427952886	0.0338681872132776	significant
EEF1G	23.089437266197	2.45883528126489e-100	significant
DPP3	2.73220437421686	0.0223089583356939	significant
FXYD6-FXYD2	13.2654232145191	4.49158868238596e-35	significant
MIR100HG	3.56863216288445	0.000725863997199227	significant
UVRAG-DT	2.64241452927686	0.230170604417152	non-significant
FDXACB1	4.02834275259506	0.0202465223416092	significant
SNHG1	4.98638868290482	2.15152379014331e-05	significant
HMBS	5.51666617560469	1.24477870914649e-05	significant
SPON1	2.34001399140557	0.0233323995931551	significant
SRSF8	2.01226701630606	0.0533282388791971	non-significant
C11orf98	5.17707791891809	3.76636226849385e-06	significant
BACE1-AS	2.32594071591507	0.129601372924803	non-significant
GSEC	1.32169425300112	0.228371386548959	non-significant

## Sheet: unblock
gene	statistic	pval	marker
MRE11	-0.0566472053853762	0.957726375389409	non-significant
NUP160	-2.41901196510439	0.026375349700513	significant
RCN1	-5.06306259523437	2.74706218613064e-06	significant
QSER1	3.05827437223993	0.00711017402610525	significant
NUCB2	-2.85044191600679	0.0987423440719066	non-significant
CLNS1A	-2.28138411934518	0.0260389552847514	significant
EED	-2.05002058852195	0.0526478874493614	non-significant
RBM7	-0.354584381915464	0.72840933673282	non-significant
GSTP1	3.47679331384443	0.000711156558611389	significant
AAMDC	0.355976145233892	0.762925600940248	non-significant
GANAB	-2.86606074836683	0.0052586493233625	significant
CCDC34	0.686225576530675	0.559810168450485	non-significant
ZPR1	-1.44399970771268	0.160719008511813	non-significant
MTCH2	0.679638916198458	0.499210252206465	non-significant
HSPA8	-19.5315678387378	1.90472228486363e-68	significant
PPP6R3	-2.06231309438548	0.0472054047003389	significant
CCDC86	-2.60949956163786	0.0228725769857406	significant
CHORDC1	-4.19719146221342	0.00118277614006631	significant
ANAPC15	0.478327183825634	0.644503524748616	non-significant
RNF141	2.44417118947337	0.0297832468468886	significant
EIF4G2	-1.10022442644662	0.284540794028636	non-significant
UBE4A	-2.40375469414368	0.0317112205630152	significant
DDX6	0.211719056706157	0.833726242513612	non-significant
FBXO3	-2.97464671828012	0.00411287490127022	significant
PDHX	-6.18494042384434	7.19323352521197e-08	significant
AMBRA1	-0.816933886138455	0.414327541007852	non-significant
C11orf58	-9.3840955611322	4.38358477259608e-18	significant
RPS13	11.4364035919205	1.9772515561915e-29	significant
GTF2H1	-0.922159147700044	0.367614229565386	non-significant
RPS25	16.1463598957859	2.49683676048302e-47	significant
SPCS2	-6.7913016386589	2.25685814366752e-10	significant
SNX19	4.00750444225039	0.000925430765380853	significant
MSANTD2	-0.288939688366227	0.798389712242913	non-significant
PRDX5	-1.3355423572918	0.185963590373277	non-significant
PSMA1	-0.65334375022341	0.514805844646277	non-significant
H19	-17.8060050873697	5.74090489317058e-65	significant
TRIM5	-1.14296349430192	0.315934519688425	non-significant
RTN3	-8.57131508466259	4.93600361828857e-15	significant
RRAS2	-3.64104573201652	0.00118276527830335	significant
DPF2	-2.84683828283751	0.00624420100619921	significant
LDHA	-29.4526458933097	4.69378373914429e-154	significant
FADS2	-3.37293925219359	0.0076734223866303	significant
NAT10	-1.05207294074758	0.309928047329616	non-significant
CAPRIN1	-1.35883984122872	0.178911468239388	non-significant
THAP12	-1.76314772508908	0.106820518713184	non-significant
CCDC90B	-0.541829782782514	0.589873326982038	non-significant
PRCP	3.14550969721342	0.00532186291291722	significant
YAP1	-3.76022683721896	0.000339072416024868	significant
RDX	-3.47427789657366	0.000958627282166879	significant
FDX1	-5.53604599132457	3.75372577841462e-07	significant
FXYD6	6.67260587934094	3.43738663873835e-06	significant
IFITM3	0.403500587880648	0.687287845077489	non-significant
BTBD10	-4.42728680029315	8.22545629580628e-05	significant
IMMP1L	1.3334487907214	0.238420164600605	non-significant
HSD17B12	-2.44256892743257	0.0182965374812727	significant
APIP	-4.52238893212935	7.35597129307106e-05	significant
DGKZ	-1.03813832323077	0.307253441110725	non-significant
EIF3M	-5.69148976413966	2.67102166309836e-08	significant
CELF1	-2.31128221109274	0.029231926057092	significant
HIKESHI	-6.68092307490296	6.54629330870132e-10	significant
SESN3	-0.978641441473662	0.340334847175963	non-significant
SERPINH1	-3.09107566695593	0.00223349512154719	significant
INTS4	-0.223062640609261	0.826258062661728	non-significant
RPS3	-33.5760056468156	4.32286176266934e-213	significant
AASDHPPT	-1.9185493925149	0.060319200040229	non-significant
HYOU1	-4.15953877909367	0.000152240438896941	significant
B3GAT3	-3.73393276517283	0.00188676688850877	significant
EI24	-2.52353192673935	0.0157363912401718	significant
TAGLN	-4.68804295135036	1.01098938683823e-05	significant
MRPL49	-3.89809486405986	0.000277333893175247	significant
FAU	13.4311189823324	6.87651356334666e-32	significant
DIXDC1	-3.2935332678281	0.00255580933008414	significant
TIMM8B	3.30916025352501	0.00116815153841372	significant
VPS26B	-1.03910907918089	0.303198366604519	non-significant
ARL14EP	-1.5628593469159	0.127270945597665	non-significant
SIK3	-3.38899237967464	0.00214996262474231	significant
LBHD1	2.88110461766005	0.00720847425987349	significant
SYVN1	43.9142481713185	3.56114935292609e-57	significant
PSMC3	-5.57954389376986	5.22046765084285e-07	significant
TAF1D	-2.54677476513963	0.0140843486888948	significant
CEP57	1.74957597376591	0.120606042685286	non-significant
API5	-3.61021725181674	0.000705667005344561	significant
CUL5	-2.58486984450217	0.0162792838074896	significant
TAF10	2.66363479791787	0.0494583564898816	significant
RPL27A	20.2187204833627	1.62554732928114e-84	significant
AKIP1	5.47196844390766	0.00201086995514769	significant
TMEM41B	-1.10716161444767	0.291057004416123	non-significant
WEE1	2.07737979565378	0.0391574341641839	significant
PLEKHA7	1.62391936179249	0.104519508291118	non-significant
IGF2	-0.971622093690073	0.499923385553933	non-significant
ATP5MG	6.58506909742861	1.24200196693469e-10	significant
CDK2AP2	-2.0010720192191	0.0496403641545076	significant
FTH1	-33.4949887001602	7.91739732448741e-201	significant
PAFAH1B2	-0.400167702792596	0.692069575457156	non-significant
STIP1	-4.50283489345672	1.43482439935498e-05	significant
FEN1	-3.40659661984279	0.00295288044416403	significant
TMEM223	23.5035750023126	4.16797099155829e-31	significant
ANKRD49	0.72776811278875	0.495979135506744	non-significant
METTL15	-1.50931710538551	0.14462582090395	non-significant
DNAJC24	0.880162157734636	0.393774434342355	non-significant
TMEM126A	11.6228120803356	6.32260348107594e-17	significant
CFL1	-5.4853793363231	5.30588243100139e-08	significant
RELA	0.813429128894975	0.419806619945302	non-significant
TRMT112	-1.65194125602995	0.101403797490722	non-significant
ESRRA	-4.33124337866409	5.70945653686087e-05	significant
PPP1R14B	-5.5103427154748	1.69038602047199e-07	significant
RBM4B	-0.0256399870081835	0.980086089777407	non-significant
RBM4	-3.43946909715426	0.000989350586388396	significant
MRPL11	-1.26671008195064	0.214885253204541	non-significant
RAB1B	-8.93266181686533	1.10091091448647e-14	significant
BANF1	-1.56370968643626	0.120361488327512	non-significant
EIF3F	-12.2212480441609	1.84552265356809e-26	significant
PAAF1	-3.16731752168067	0.00441519294263239	significant
MRPL48	-0.521659156771142	0.607143797421812	non-significant
RAB6A	-5.08512365428969	2.38885830267702e-06	significant
COX8A	1.24963408660889	0.337812019668967	non-significant
FAM89B	-0.284784190158995	0.776689012799176	non-significant
TALDO1	-4.37735433677621	0.000193841459265604	significant
RPLP2	33.3208003535551	1.62277411323028e-159	significant
POLR2L	41.2154944600986	1.46309910929713e-30	significant
DDX10	-3.12596228114867	0.0185073668075617	significant
DUSP8	2.64162856568619	0.0146994950542172	significant
OR7E14P	-3.56336630682958	0.115647241607603	non-significant
IFITM2	6.00458699601694	9.85619206674383e-08	significant
IFITM1	2.95696476166444	0.0166881688288021	significant
ZFP91	-2.16155633248804	0.0378051040582607	significant
TEAD1	-1.71779295807678	0.0910863289523575	non-significant
ZBTB44	0.21993006745362	0.829528500534038	non-significant
MRPL21	-0.93982920630869	0.351624399472015	non-significant
BCO2	-0.634356420300131	0.584374922499539	non-significant
FAR1	-1.91192571277585	0.0713374806415953	non-significant
CTNND1	-2.1850325018521	0.0311581404630408	significant
SDHD	-8.10562477513725	2.65455100862214e-14	significant
IPO7	-1.4561061823759	0.149399449949332	non-significant
NAP1L4	-2.4618805816957	0.0154122000027018	significant
TMX2	-4.72154451534425	1.01166063635872e-05	significant
MRPL23	1.764492700356	0.107756100070533	non-significant
RPS28P7	24.2288949325571	4.75667733633262e-83	significant
FABP5P7	-0.797306976247179	0.43838208485485	non-significant
RPL37P2	2.21888859320874	0.0290209808599188	significant
EEF1G	-59.6393100090758	0	significant
DPP3	-2.49822733721184	0.0446555850648335	significant
FXYD6-FXYD2	6.64902624267682	3.57053172310805e-06	significant
SRSF8	-2.09199616575065	0.0475042126407508	significant
C11orf98	2.76886047254153	0.0095055211303916	significant
